# Supplementary material for: Disruption of Reelin signaling in a dual-hit mouse model of schizophrenia: impact of postnatal Δ9-tetrahydrocannabinol exposure in a maternal immune activation model
Source: Research Square preprint supplement (doi:10.21203/rs.3.rs-7299003/v1), 2026-01-13
Supplement: Supplementary file 1 [file 4c170dd2bbd9702115962850.xlsx]

## Sheet: Sheet1
							Male S+V					Male P+V					Male S+T					Male P+T					Female S+V				Female P+V					Female S+T				Female P+T
Sample							1	2	3	4	5	6	7	8	9	10	11	12	13	14	15	16	17	18	19	20	21	22	23	24	25	26	27	28	29	30	31	32	33	34	35	36	37	38	Male average				Macho Salino
Accession	Description	ΣCoverage	Σ# Proteins	Σ# Unique Peptides	Σ# Peptides	Σ# PSMs	A5: Area	I5: Area	Q5: Area	Y5: Area	AG5: Area	B5: Area	J5: Area	R5: Area	Z5: Area	AH5: Area	C5: Area	K5: Area	S5: Area	AA5: Area	AI5: Area	D5: Area	L5: Area	T5: Area	AB5: Area	AJ5: Area	E5: Area	M5: Area	U5: Area	AC5: Area	F5: Area	N5: Area	V5: Area	AD5: Area	AK5: Area	G5: Area	O5: Area	W5: Area	AE5: Area	H5: Area	P5: Area	X5: Area	AF5: Area	AL5: Area	S+V	P+V	S+T	P+T	Ratio(n)
P63242	Eukaryotic translation initiation factor 5A-1 OS=Mus musculus OX=10090 GN=Eif5a PE=1 SV=2 - [IF5A1_MOUSE]	100	2	12	22	445	8.21748e+08	4.5082e+08	5.30593e+08	6.85227e+08	5.04149e+08	7.54773e+08	7.91092e+08	5.6045e+08	7.61532e+08	4.14677e+08	1.20792e+09	7.70055e+08	6.06406e+08	8.1749e+08	6.97776e+08	6.86769e+08	5.60661e+08	6.52005e+08	723379625	8.41922e+08	1136940386	5.9705e+08	6.483e+08	5.29448e+08	6.73125e+08	6.27187e+08	8.51955e+08	8.21785e+08	9.80342e+08	6.98567e+08	545986363	7.15635e+08	8.10603e+08	7.62845e+08	6.40655e+08	1111055432	7.46978e+08	8.17705e+08	5.98508e+08	6.56505e+08	8.19929e+08	6.92947e+08	1.36996
P29595	NEDD8 OS=Mus musculus OX=10090 GN=Nedd8 PE=1 SV=2 - [NEDD8_MOUSE]	100	1	4	17	250	3.98401e+08	2.57178e+08	2.42969e+08	4.39881e+08	2.2718e+08	3.71996e+08	3.69312e+08	4.75668e+08	3.42896e+08	1.7404e+08	3.24736e+08	4.68886e+08	4.23713e+08	4.09435e+08	3.55977e+08	2.95878e+08	2.96678e+08	2.99839e+08	4.33179e+08	4.28253e+08	247940597	2.53252e+08	3.02275e+08	4.20945e+08	2.58898e+08	3.6908e+08	4.43586e+08	3.72343e+08	5.0471e+08	2.89905e+08	3.54253e+08	3.61451e+08	3.73568e+08	4.11512e+08	3.2281e+08	6.22254e+08	3.85891e+08	4.17354e+08	3.13122e+08	3.46782e+08	3.96549e+08	3.50765e+08	1.26644
P60710	Actin, cytoplasmic 1 OS=Mus musculus OX=10090 GN=Actb PE=1 SV=1 - [ACTB_MOUSE]	100	2	13	56	9348	5.85614e+10	3.25504e+10	37269113090	47506193623	3.0827e+10	5.25508e+10	5.36058e+10	4.44188e+10	4.66128e+10	3.36242e+10	52307981218	5.64231e+10	40358740335	5.9487e+10	4.92192e+10	4.16767e+10	3.88192e+10	4.22899e+10	5.2927e+10	6.15954e+10	4.38746e+10	44068800866	4.00841e+10	3.36875e+10	4.46829e+10	3.85705e+10	5.21479e+10	48295058271	5.72062e+10	4.81148e+10	4.24422e+10	5.44109e+10	6.1108e+10	56137245758	4.44602e+10	67784840592	5.26342e+10	5.01938e+10	4.13428e+10	4.61625e+10	5.15592e+10	4.74616e+10	1.24711
P0DP27	Calmodulin-2 OS=Mus musculus OX=10090 GN=Calm2 PE=1 SV=1 - [CALM2_MOUSE]	100	2	8	26	3674	2.28277e+10	1.41022e+10	1.58995e+10	2.26717e+10	1.44802e+10	2.02877e+10	2.21367e+10	1.88964e+10	2.28941e+10	1.23221e+10	2.00029e+10	25418763043	1.94337e+10	2.74856e+10	2.20428e+10	1.73473e+10	1.99539e+10	1.8517e+10	22644375783	24109609538	17756382955	2.24303e+10	1.66182e+10	1.81978e+10	17907593521	18885825486	28452523228	1.95273e+10	2.40501e+10	1.96464e+10	1.77796e+10	2.19189e+10	2.93758e+10	2.41781e+10	1.85354e+10	3.16248e+10	2.55443e+10	2.68193e+10	1.79963e+10	1.93074e+10	2.28767e+10	2.05144e+10	1.27119
P84089	Enhancer of rudimentary homolog OS=Mus musculus OX=10090 GN=Erh PE=1 SV=1 - [ERH_MOUSE]	100	1	5	15	132	3.62439e+08	1.37356e+08	1.24318e+08	1.33512e+08	9.80232e+07	2.16694e+08	2.38143e+08	1.48442e+08	2.24336e+08	7.32179e+07	1.94795e+08	279499046	1.96897e+08	1.86877e+08	1.73467e+08	1.6244e+08	1.36591e+08	1.93179e+08	1.55245e+08	1.99781e+08	1.15299e+08	1.75717e+08	1.74773e+08	1.38241e+08	2.30549e+08	1.79293e+08	2.08332e+08	1.56879e+08	2.04055e+08	1.86416e+08	154802973	1.29299e+08	1.96172e+08	2.06654e+08	1.70929e+08	245080906	2.60407e+08	2.01796e+08	1.7113e+08	1.80167e+08	2.06307e+08	1.69447e+08	1.20556
Q60605	Myosin light polypeptide 6 OS=Mus musculus OX=10090 GN=Myl6 PE=1 SV=3 - [MYL6_MOUSE]	100	1	6	27	361	6.28317e+08	4.04891e+08	2.31094e+08	3.46867e+08	2.61205e+08	6.16905e+08	5.48194e+08	3.6467e+08	2.77884e+08	2.86178e+08	5.45047e+08	6.30686e+08	2.5975e+08	4.24437e+08	3.75687e+08	4.06406e+08	3.61406e+08	3.80367e+08	4.46599e+08	6.24063e+08	4.22661e+08	3.51499e+08	4.03501e+08	1.86644e+08	5.15306e+08	447477666	4.70859e+08	4.51077e+08	5.98852e+08	5.14367e+08	4.31322e+08	5.10368e+08	5.13455e+08	7.01192e+08	5.16127e+08	673957596	3.8226e+08	3.58849e+08	3.74475e+08	4.18766e+08	4.47121e+08	4.43768e+08	1.194
P61021	Ras-related protein Rab-5B OS=Mus musculus OX=10090 GN=Rab5b PE=1 SV=1 - [RAB5B_MOUSE]	100	1	5	27	212	1.8067e+08	6.11632e+07	3.0332e+09	3.56789e+09	9.90586e+07	1.36781e+08	4.9304e+09	1.57034e+08	3.53995e+09	2.2596e+09	4.29152e+08	6.08849e+09	1.87953e+08	4.46647e+09	9.37072e+07	3526116222	9.47372e+07	3.36636e+09	4367049537	4.46903e+09	3.33183e+09	2.09325e+08	3.19146e+09	3.32912e+09	1.03548e+08	4.50675e+09	2.20848e+08	3.80671e+09	4.16478e+09	4.02222e+09	3.12919e+09	3.74581e+09	3.77812e+09	6.07787e+09	1.98975e+08	6.95233e+09	3.65462e+09	1.99974e+08	1.3884e+09	2.20475e+09	2.25315e+09	3.16466e+09	1.62285
Q8BU31	Ras-related protein Rap-2c OS=Mus musculus OX=10090 GN=Rap2c PE=1 SV=1 - [RAP2C_MOUSE]	100	1	1	21	140	1.37544e+09	6.13281e+07	5.13902e+08	132021212	4.10306e+08	6.49195e+08	7.95666e+08	2.37391e+08	1.10552e+09	5.37607e+08	1.18484e+09	3.9508e+08	101608233	8.64374e+08	6.2586e+08	8.82414e+08	8.35866e+07	6.28684e+08	7.98209e+08	7.1999e+08	4.57686e+08	3.71525e+08	5.73645e+08	5.94355e+07	9.48935e+08	2.38482e+08	4.83862e+08	1.62499e+09	1.19166e+09	5.46709e+08	5.75529e+08	4.82975e+08	8.29338e+08	3.15962e+08	6.79361e+08	3.65705e+08	9.03632e+08	359663958	4.986e+08	6.65076e+08	6.34352e+08	6.22577e+08	1.27227
P62889	60S ribosomal protein L30 OS=Mus musculus OX=10090 GN=Rpl30 PE=1 SV=2 - [RL30_MOUSE]	100	1	5	22	249	3.4999e+08	1.96591e+08	3.49677e+08	2.80467e+08	2.02123e+08	3.85717e+08	3.35176e+08	4.4694e+08	3.08341e+08	2.08998e+08	3.2605e+08	3.92467e+08	3.89383e+08	579878996	2.76444e+08	2.80536e+08	356658481	269675935	4.01012e+08	5.28709e+08	3.61887e+08	2.60942e+08	2.64515e+08	2.54486e+08	3.0859e+08	4.63928e+08	4.09764e+08	4.52808e+08	5.23031e+08	2.95243e+08	2.35437e+08	4.25997e+08	3.35151e+08	3.78602e+08	4.26932e+08	8.45237e+08	339440073	3.5882e+08	2.7577e+08	3.37034e+08	3.92844e+08	3.67318e+08	1.42454
Q923G2	DNA-directed RNA polymerases I, II, and III subunit RPABC3 OS=Mus musculus OX=10090 GN=Polr2h PE=1 SV=3 - [RPAB3_MOUSE]	100	1	3	13	83	2.42222e+08	1.00151e+08	9.56525e+07	1.25366e+08	1.30046e+08	1.74967e+07	2.02144e+08	9.90717e+06	1.77183e+08	2.58705e+08	7.96774e+07	2.46306e+08	2.80367e+08	3.00063e+08	1.93147e+08	1.59774e+08	187131391	1.79795e+08	1.91719e+08	299633342	8.61975e+06	7.11848e+07	1.19881e+07	1.77702e+07	7.67807e+07	3.59235e+07	4.00908e+08	1.4139e+08	149342243	1.88835e+08	1.00754e+08	227177530	1.35936e+07	4.7884e+06	3.76602e+08	1.62902e+07	2.30935e+08	2.24825e+07	1.38688e+08	1.33087e+08	2.19912e+08	2.03611e+08	1.58567
P62309	Small nuclear ribonucleoprotein G OS=Mus musculus OX=10090 GN=Snrpg PE=1 SV=1 - [RUXG_MOUSE]	100	1	3	9	93	98187021	29439931	8.61154e+07	1.39929e+08	9.952e+07	4.55056e+07	7.89463e+07	4.42193e+07	7.86721e+07	3.66014e+07	2.3117e+07	52106108	1.14467e+08	9.53201e+07	9.21433e+07	100303925	5.52862e+07	8.36488e+07	1.36359e+08	1.04418e+08	148963908	6.89577e+07	1.15382e+08	95445519	4.45457e+07	5.86879e+07	7.32049e+07	7.5734e+07	1.23844e+08	5.52204e+07	7.55004e+07	9.73757e+07	8.21466e+07	4.68031e+07	7.8892e+07	1.13452e+08	7.71028e+07	2.85362e+07	9.06382e+07	5.67889e+07	7.54308e+07	9.60032e+07	0.832219
P17742	Peptidyl-prolyl cis-trans isomerase A OS=Mus musculus OX=10090 GN=Ppia PE=1 SV=2 - [PPIA_MOUSE]	100	1	12	30	1333	1.44919e+10	9.46726e+09	8.6963e+09	9632590168	7.98522e+09	1.42664e+10	1.36167e+10	1.33346e+10	1.03276e+10	7.23113e+09	11482832590	1.56748e+10	9961580607	1.3768e+10	1.25163e+10	1.1232e+10	1.20269e+10	1.03036e+10	1.14441e+10	1.30894e+10	1.04551e+10	1.08312e+10	9.94387e+09	11260273872	1.17564e+10	1.18244e+10	1.58195e+10	1.20182e+10	1.25323e+10	1.13118e+10	9525931573	1.35152e+10	1.49424e+10	13580607186	11647698922	1.78764e+10	1.22338e+10	13790607869	1.00547e+10	1.17553e+10	1.26807e+10	1.16192e+10	1.26118
P52760	2-iminobutanoate/2-iminopropanoate deaminase OS=Mus musculus OX=10090 GN=Rida PE=1 SV=3 - [RIDA_MOUSE]	100	1	8	18	231	3.68716e+08	2.6516e+08	1.71335e+08	2.02928e+08	1.50972e+08	4.15158e+08	345949992	2.62833e+08	202534291	1.12883e+08	3.00125e+08	4.0184e+08	1.76663e+08	5.95657e+08	4.622e+08	2.65171e+08	2.30615e+08	1.83717e+08	8.19262e+08	564219817	2.26646e+08	2.51529e+08	1.7168e+08	2.58746e+08	4.04158e+08	3.52896e+08	3.39774e+08	1.9794e+08	2.55036e+08	5.57908e+08	1.55813e+08	1.82074e+08	1.99145e+08	418404016	2.12753e+08	5.61093e+08	2.36348e+08	2.66653e+08	2.31822e+08	2.67872e+08	3.87297e+08	4.12597e+08	1.67066
P08228	Superoxide dismutase [Cu-Zn] OS=Mus musculus OX=10090 GN=Sod1 PE=1 SV=2 - [SODC_MOUSE]	100	1	14	19	293	1.41315e+09	4.55237e+08	8.55978e+08	9.70675e+08	3.8309e+08	1.11803e+09	1.02075e+09	5.78738e+08	1.05132e+09	5.27398e+08	1.16388e+09	8.74653e+08	6.83103e+08	8.71928e+08	5.78515e+08	7.53149e+08	6.4969e+08	940754486	7.54761e+08	9.08029e+08	9.05404e+08	6.4045e+08	7.06874e+08	3.55328e+08	1.08369e+09	7.07307e+08	8.24588e+08	6.69576e+08	1.29061e+09	9.62881e+08	6.39964e+08	8.02837e+08	6.64205e+08	6.98519e+08	7.24321e+08	633355286	7.54393e+08	5.43942e+08	8.15626e+08	8.59246e+08	8.34417e+08	8.01277e+08	1.02304
Q91ZR1	Ras-related protein Rab-4B OS=Mus musculus OX=10090 GN=Rab4b PE=1 SV=2 - [RAB4B_MOUSE]	100	4	4	25	206	1.50803e+09	1.37511e+09	1.29433e+09	1.30292e+09	6.79044e+08	4181808576	2.24934e+09	1.27473e+09	1.09171e+09	8.5587e+08	1.1661e+09	2.30462e+09	1300798659	1.33225e+09	1.03062e+09	1.34632e+09	909687665	1.19266e+09	1.19377e+09	1.16587e+09	9.85729e+08	1336248727	9.79235e+08	1.56146e+09	8.7821e+08	1.64549e+09	1.88587e+09	1.32552e+09	1.3749e+09	1.13567e+09	7.30848e+08	8.74296e+08	1.1723e+09	1.22276e+09	1.09786e+09	2.22188e+09	1.77695e+09	1494177165	1.23189e+09	1.93069e+09	1.42688e+09	1.16166e+09	1.15828
P62075	Mitochondrial import inner membrane translocase subunit Tim13 OS=Mus musculus OX=10090 GN=Timm13 PE=1 SV=1 - [TIM13_MOUSE]	100	1	3	16	125	1.2619e+08	7.9021e+07	54332514	1.03226e+08	7.39821e+07	1.49039e+08	1.21187e+08	1.41588e+08	9.85287e+07	3.84892e+07	1.34055e+08	128377131	7.31442e+07	162574791	1.16197e+08	7.74198e+07	9.01951e+07	8.8665e+07	8.69757e+07	149963346	8.8822e+07	1.01369e+08	71364166	1.79489e+08	1.11591e+08	9.93592e+07	1.9041e+08	1.1699e+08	92833172	1.27534e+08	7.60838e+07	1.91742e+08	1.37796e+08	145843685	9.32342e+07	2.72433e+08	2.1419e+08	1.76413e+08	8.73503e+07	1.09766e+08	1.2287e+08	9.86438e+07	1.40663
Q9CR98	Protein FAM136A OS=Mus musculus OX=10090 GN=Fam136a PE=1 SV=1 - [F136A_MOUSE]	100	1	4	27	164	125396098	2.99485e+07	0	5.20759e+07	36664296	2.45623e+07	8.6702e+07	3.6263e+07	6.3186e+08	6.12895e+07	82354720	0	1.42436e+07	1.34736e+08	3.52409e+07	75965996	0	1.77084e+07	1.27889e+08	1.1851e+08	5.71459e+07	4.26483e+07	0	4.01137e+07	91971879	3.58467e+07	1.30087e+08	7.97265e+07	8.67044e+07	1.36356e+07	737841527	91548607	4.88425e+07	8.08662e+07	7.09522e+06	8.4399e+07	5.95072e+07	5.47204e+07	4.88169e+07	1.68135e+08	5.3315e+07	6.80147e+07	1.09214
Q9CQX2	Cytochrome b5 type B OS=Mus musculus OX=10090 GN=Cyb5b PE=1 SV=1 - [CYB5B_MOUSE]	100	1	5	12	78	1.38268e+08	2.086e+07	2.16032e+07	6.56836e+07	2.13737e+07	1.31922e+08	5.95583e+07	2.05363e+07	0	6.75559e+07	135853188	2.44865e+08	1.68972e+07	1.01242e+08	3.2405e+07	6.89286e+07	0	2.82408e+07	61499196	1.58146e+08	1.15311e+08	0	34485688	4.51752e+07	8.35731e+07	7.08917e+07	5.93438e+07	1.73169e+07	4.23618e+07	31625091	0	57083729	33758121	1.31903e+08	1.8843e+08	1.49864e+08	3.91812e+07	5.07772e+07	5.35578e+07	5.59145e+07	1.06252e+08	6.3363e+07	1.98388
Q9QUI0	Transforming protein RhoA OS=Mus musculus OX=10090 GN=Rhoa PE=1 SV=1 - [RHOA_MOUSE]	100	2	9	33	384	3.01609e+08	173195651	1.49019e+08	6.58451e+07	1.30349e+08	2.5121e+08	2.74305e+08	1.61457e+08	1.78495e+08	1.08006e+08	2.58198e+08	9.52223e+07	1.85682e+08	1.9516e+08	1.94941e+08	7.1332e+08	124387662	1.53857e+08	1.16994e+08	5.44554e+09	1.66975e+08	133461283	1.56065e+08	1.93344e+08	2.05066e+08	1.99542e+08	1.91478e+09	2.18386e+08	1.47352e+08	2.20093e+08	1.57485e+08	1.59918e+08	2.32941e+08	7.95105e+08	1.12691e+08	3410972071	1.40852e+08	3261552594	1.64003e+08	1.94694e+08	1.85841e+08	1.31082e+09	1.13315
P70444	BH3-interacting domain death agonist OS=Mus musculus OX=10090 GN=Bid PE=1 SV=2 - [BID_MOUSE]	100	1	2	23	93	8.84678e+08	9.96038e+06	0	5.93949e+07	6.03824e+07	1.08163e+08	2.57253e+08	2.43583e+08	3.9304e+07	1.03611e+08	1.16797e+08	1.97384e+07	5.3487e+07	2.78416e+08	5.40496e+07	1.92793e+07	9.84474e+07	1.1769e+08	2.3625e+08	1.01411e+08	7.65134e+07	83360785	6.08497e+07	267358351	3.98704e+07	9.21397e+07	6.73515e+07	0	7.39917e+07	8.62637e+07	0	3.02647e+06	8.28118e+07	3.37606e+09	3.71976e+07	0	3.27626e+08	1.00868e+08	2.02883e+08	1.50383e+08	1.04498e+08	1.14616e+08	0.515063
Q9D258	Acyl-CoA-binding domain-containing protein 7 OS=Mus musculus OX=10090 GN=Acbd7 PE=3 SV=2 - [ACBD7_MOUSE]	100	1	1	16	247	6.26653e+08	4.81976e+08	2.5435e+08	6.10503e+08	5.24594e+08	2.17567e+08	9.08515e+08	9.71862e+08	893454618	6.63392e+08	4.43499e+08	8.42753e+08	6.23052e+08	9.18451e+08	6.84696e+08	1.17065e+08	1.18872e+09	1856760669	1.54919e+09	837329495	6.06351e+08	3.1225e+08	5.70885e+08	4.33214e+08	324351075	2.08669e+08	2.72938e+08	2.07086e+09	7.51672e+08	7.71275e+08	3.07968e+08	7.71334e+08	6.97117e+08	7.33639e+08	6.13381e+08	9.79862e+08	2.29585e+09	7.7107e+08	4.99615e+08	7.30958e+08	7.0249e+08	1.10981e+09	1.40606
O35639	Annexin A3 OS=Mus musculus OX=10090 GN=Anxa3 PE=1 SV=4 - [ANXA3_MOUSE]	100	2	14	56	326	2.99467e+09	70281070	9.15875e+07	1.01607e+08	6.59001e+07	8.75135e+07	1.40557e+08	1.30853e+08	143878388	1.00909e+08	1.01827e+08	8.80152e+07	8.35107e+07	1.02673e+08	6.89976e+07	1.29458e+08	9.14983e+07	5.24968e+07	9.18438e+07	8.6569e+07	2156674053	1.02082e+08	6.39249e+07	9.35422e+07	3.08054e+09	9.65407e+07	1.54177e+08	8.88822e+07	1.06503e+08	7.96781e+07	6.72245e+07	7.35086e+07	2.9329e+09	8.65215e+07	1.03923e+08	1.60136e+08	8.26275e+08	1.29398e+08	6.64808e+08	1.20742e+08	8.90048e+07	9.03731e+07	0.13388
P09813	Apolipoprotein A-II OS=Mus musculus OX=10090 GN=Apoa2 PE=1 SV=2 - [APOA2_MOUSE]	100	1	1	11	22	0	0	0	0	0	0	0	0	0	8.37084e+07	0	0	0	42834070	0	3.1052e+07	50170312	0	4.19632e+07	43672064	0	5.29782e+07	7.56387e+07	0	5.53037e+07	4.19455e+07	0	0	3.40271e+07	0	6.47522e+07	0	51325773	0	0	0	0	0	0	1.67417e+07	8566814	3.33715e+07	#DIV/0!
Q9D898	Actin-related protein 2/3 complex subunit 5-like protein OS=Mus musculus OX=10090 GN=Arpc5l PE=1 SV=1 - [ARP5L_MOUSE]	100	1	7	23	245	5.03266e+08	3.67783e+08	3.35853e+08	4.40798e+08	3.23465e+08	486020330	5.06812e+08	6.53309e+08	434823619	2.95391e+08	491561953	6.16601e+08	4.57324e+08	6.74308e+08	4.76955e+08	3.47811e+08	4.33103e+08	4.09537e+08	5.59936e+08	5.87913e+08	3.79743e+08	4.86695e+08	4.08395e+08	3.80155e+08	4.17359e+08	3.52077e+08	7.65741e+08	5.53294e+08	5.75062e+08	4.77369e+08	3.76444e+08	5.21542e+08	6.42754e+08	446328973	3.55067e+08	7.25974e+08	5.63894e+08	6.9212e+08	3.94233e+08	4.75271e+08	5.4335e+08	4.6766e+08	1.37825
O08997	Copper transport protein ATOX1 OS=Mus musculus OX=10090 GN=Atox1 PE=1 SV=1 - [ATOX1_MOUSE]	100	1	4	9	165	2.38544e+08	274727429	1.2807e+08	1.51793e+08	217068685	1.90768e+08	2.29414e+08	1.28933e+08	1.75147e+08	8.32539e+07	181322780	220905478	116406448	1.84709e+08	2.71534e+08	2.24995e+08	3.2549e+08	9.12695e+07	3.32019e+08	2.84274e+08	1.38498e+08	1.3684e+08	1.25484e+08	3.76741e+08	1.53813e+08	1.63231e+08	1.70389e+08	2.03416e+08	2.65526e+08	1.51146e+08	1.44231e+08	1.47721e+08	243370738	3.41659e+08	1.59321e+08	2.87414e+08	177018651	1.1075e+08	2.02041e+08	1.61503e+08	194975511	2.5161e+08	0.965031
O54962	Barrier-to-autointegration factor OS=Mus musculus OX=10090 GN=Banf1 PE=1 SV=1 - [BAF_MOUSE]	100	1	3	13	80	1357248529	271869378	1.66642e+08	1.41954e+08	1.13431e+08	1.80816e+08	1.46142e+08	1.81898e+08	7.91826e+07	7.90541e+07	8.10193e+07	446647754	7.2304e+07	1.7427e+08	1.29945e+08	1.26774e+08	342453333	176034313	1.63117e+08	3.76663e+08	0	2.53051e+08	101604323	2.17705e+08	2574621997	3.38103e+08	283040165	3.45464e+08	2.53432e+08	1.89346e+08	1.60568e+08	87358405	1.50811e+08	3.8114e+08	177244378	4.07852e+08	102388310	194812569	4.10229e+08	1.33419e+08	1.80837e+08	2.37008e+08	0.44082
Q9D6P8	Calmodulin-like protein 3 OS=Mus musculus OX=10090 GN=Calml3 PE=2 SV=1 - [CALL3_MOUSE]	100	1	1	23	1804	3.64851e+09	1.12851e+09	1.59582e+09	2473036570	1.27401e+09	2.49123e+09	3.13701e+09	1.31439e+09	3.09164e+09	1.15201e+09	2.94035e+09	1.72014e+09	2.46039e+09	3.10681e+09	1.67234e+09	1.92587e+09	1.49723e+09	1.78418e+09	2.75791e+09	2.42425e+09	1.49728e+09	1.55106e+09	1.63952e+09	2.0016e+09	2.68708e+09	1.36701e+09	2.70599e+09	1.74651e+09	3.92408e+09	1824999273	1.61333e+09	1.47678e+09	2.00358e+09	1.65728e+09	1.90867e+09	2.3533e+09	4.4784e+09	3.85467e+09	2.02398e+09	2.23725e+09	2.38e+09	2.07789e+09	1.17591
P60824	Cold-inducible RNA-binding protein OS=Mus musculus OX=10090 GN=Cirbp PE=1 SV=1 - [CIRBP_MOUSE]	100	1	6	36	272	2.31471e+08	2.17181e+08	5.60986e+07	6.26441e+07	7.15291e+07	2.54484e+08	1.312e+08	9.08584e+07	1.1273e+08	6.11595e+07	2.44484e+08	302410923	9.2822e+07	1.33062e+08	6.74365e+07	1.069e+08	6.5256e+07	1.70697e+08	6.37099e+07	164328509	7.59635e+07	9.57076e+07	1.45496e+08	4.81745e+07	1.0146e+08	1.00857e+08	7.95159e+07	1.75917e+07	1.01371e+08	1.15003e+08	5.5846e+07	1.02223e+08	7.75017e+07	2.27404e+08	1.03898e+08	1.45445e+08	5.01886e+07	4.31841e+07	1.27785e+08	1.30087e+08	1.68043e+08	1.14178e+08	1.31505
Q62426	Cystatin-B OS=Mus musculus OX=10090 GN=Cstb PE=1 SV=1 - [CYTB_MOUSE]	100	1	3	15	136	2.69111e+08	9.44643e+07	185282785	3.2241e+08	7.95765e+07	3.42626e+07	2.78363e+08	9.9195e+07	592256976	3.86094e+08	0	122148083	1.83564e+08	2.81622e+08	128494536	2.15365e+08	9.08656e+08	2.34886e+08	617249461	8.45293e+07	7.79128e+07	7.47271e+07	2.17904e+08	3.93731e+06	2.32901e+08	1.02645e+08	194181184	3.28137e+08	2.30557e+08	2.21904e+08	2.79952e+08	2.62423e+08	2.78904e+08	1.58089e+08	1.26268e+08	1.4943e+08	5.13171e+08	1.85044e+08	1.90169e+08	2.78034e+08	1.43166e+08	4.12137e+08	0.752835
P56387	Dynein light chain Tctex-type 3 OS=Mus musculus OX=10090 GN=Dynlt3 PE=1 SV=1 - [DYLT3_MOUSE]	100	1	3	10	59	163948668	8.653e+07	62347702	8.31809e+07	5.90929e+07	213434663	178636500	107954110	9.83391e+07	43413885	4.97308e+07	190245274	1.02032e+08	8.93098e+07	65808782	9.6413e+07	1.02332e+08	6.28062e+07	104795959	1.51278e+07	4.70995e+07	76193849	9.45407e+07	1.0265e+08	9.26895e+07	158697070	161466628	104209948	1.18038e+08	6.51222e+07	7.85631e+07	8.4355e+07	9.94467e+07	178705778	1.03241e+08	218952084	9.9892e+07	1.49083e+08	9.102e+07	1.28356e+08	99425334	7.6295e+07	1.09235
P51880	Fatty acid-binding protein, brain OS=Mus musculus OX=10090 GN=Fabp7 PE=1 SV=2 - [FABP7_MOUSE]	100	1	5	14	74	1.46764e+08	2.15565e+08	3.35495e+08	3.28693e+08	1.859e+08	6.00871e+07	1.09034e+08	4.04459e+06	6.95867e+06	131438034	1.20291e+08	7.55271e+06	1.06184e+07	205400401	1.82545e+08	4.98254e+07	7.23523e+06	9234998	1.197e+08	489583829	2.61176e+08	3.1133e+06	1.95246e+08	6880735	8.79935e+07	3.49051e+06	3.64992e+06	7.03274e+07	4.87773e+08	3.37362e+08	4.54133e+07	3.79642e+08	1.06227e+08	2.88634e+07	5.13756e+06	436859804	1.48808e+08	1.11148e+07	2.42484e+08	6.23124e+07	1.05281e+08	1.35116e+08	0.43418
P11404	Fatty acid-binding protein, heart OS=Mus musculus OX=10090 GN=Fabp3 PE=1 SV=5 - [FABPH_MOUSE]	100	1	5	17	384	2.04649e+09	7.02146e+08	8.43145e+08	1.18137e+09	8.84666e+08	1.32939e+09	1.6129e+09	809049087	1597716928	9.44946e+08	1.69294e+09	1.15893e+09	1.07631e+09	2.07777e+09	1.29105e+09	1.2833e+09	9.05121e+08	1.30467e+09	1.6185e+09	1.91825e+09	1.38319e+09	1.28518e+09	1.20357e+09	9.42287e+08	1160899778	1.0552e+09	1.73568e+09	1.53762e+09	1771827101	1.0997e+09	1.32096e+09	1.60864e+09	1.77863e+09	1.17762e+09	1.33577e+09	1.49973e+09	1.65551e+09	1.27723e+09	1.13156e+09	1.2588e+09	1.4594e+09	1.40597e+09	1.28972
P16858	Glyceraldehyde-3-phosphate dehydrogenase OS=Mus musculus OX=10090 GN=Gapdh PE=1 SV=2 - [G3P_MOUSE]	100	1	25	55	11111	32213784922	2.05111e+10	2.09624e+10	2.39546e+10	21891305170	3.19253e+10	3.00222e+10	2.33273e+10	2.44516e+10	2.0346e+10	2.91082e+10	30403996304	23109677881	3.63402e+10	2.54274e+10	22421129002	2.08213e+10	2.7328e+10	30884743732	4.23238e+10	2.31084e+10	24046822264	2.96904e+10	18997378192	2.55554e+10	2.50231e+10	30124714739	34693296580	3.72667e+10	29031437686	2.58835e+10	3.26658e+10	32060588133	2.88295e+10	2.35789e+10	3.67462e+10	2.51238e+10	2.51213e+10	2.39066e+10	2.60145e+10	2.88779e+10	2.87558e+10	1.20795
P48774	Glutathione S-transferase Mu 5 OS=Mus musculus OX=10090 GN=Gstm5 PE=1 SV=1 - [GSTM5_MOUSE]	100	1	18	40	730	1.18552e+09	6.88037e+08	5.80385e+08	635555880	4.67593e+08	1.58467e+09	1315407598	5.7999e+08	1069276922	4.78282e+08	1.29442e+09	1.62635e+09	6.79644e+08	9.92369e+08	7.44893e+08	8.89603e+08	7.30415e+08	6.24944e+08	9.22003e+08	5.34445e+08	8.74607e+08	9.91984e+08	5.53343e+08	6.43997e+08	9.60013e+08	788323129	1.15575e+09	7.42051e+08	7.59492e+08	9.54416e+08	542013468	5.96731e+08	8.40972e+08	947628793	9.05815e+08	1.21043e+09	9.0857e+08	9.24109e+08	7.11419e+08	1.00552e+09	1.06753e+09	7.40282e+08	1.50057
P01942	Hemoglobin subunit alpha OS=Mus musculus OX=10090 GN=Hba PE=1 SV=2 - [HBA_MOUSE]	100	2	9	16	3165	4.67448e+10	1.64669e+10	1.64957e+10	2.13482e+10	1.80448e+10	33257302480	2.4341e+10	3.07416e+10	2.45945e+10	2.25245e+10	2.66122e+10	28882652542	1.81477e+10	3.63653e+10	2.40057e+10	2.10487e+10	3.864e+10	4.07239e+10	55654269677	3.61926e+10	1.97208e+10	2.47895e+10	1.9128e+10	17723899919	2.15721e+10	1.60695e+10	2.4709e+10	2.78634e+10	2.58563e+10	2.75095e+10	2.01166e+10	3.02777e+10	3.39889e+10	21706532333	2.28448e+10	3.2818e+10	3.21675e+10	24310189880	2.38201e+10	2.70918e+10	2.68027e+10	3.84519e+10	1.12522
O08756	3-hydroxyacyl-CoA dehydrogenase type-2 OS=Mus musculus OX=10090 GN=Hsd17b10 PE=1 SV=4 - [HCD2_MOUSE]	100	1	8	31	172	3.02377e+08	9.20409e+07	4.31041e+07	1.49691e+08	5.65691e+07	1.3352e+08	4.79172e+08	6.19427e+07	6.61425e+07	6.8913e+07	8.53418e+07	5.17332e+08	5.40513e+07	2.2262e+08	5.84473e+07	5.07707e+07	6.63252e+07	4.21269e+07	7.90973e+07	9.25714e+07	4.09853e+07	45627597	6.63387e+07	8.60792e+07	6.13006e+07	4.52532e+07	4.55397e+08	1.02503e+08	3.06799e+08	5.86138e+07	3.67581e+07	1.07685e+08	1.06945e+08	2.00435e+08	1.97125e+08	1.71266e+08	114500045	43272072	1.28756e+08	1.61938e+08	1.87558e+08	6.61783e+07	1.45669
P62748	Hippocalcin-like protein 1 OS=Mus musculus OX=10090 GN=Hpcal1 PE=1 SV=2 - [HPCL1_MOUSE]	100	1	3	36	568	3.02408e+09	373541799	2.6599e+08	4.67044e+08	3.19617e+08	521786860	4.61719e+08	5.4192e+08	5.01454e+08	2.34478e+08	6.79921e+08	598421118	4.78581e+08	6.63166e+08	4.36753e+08	3.52598e+08	4.52059e+08	3.02399e+08	5.3024e+08	5.19017e+08	3.93842e+08	4.69036e+08	322248514	5.48679e+08	3.41038e+08	4.45833e+08	864481638	4.47046e+08	4.64565e+08	462445226	3.88093e+08	5.0149e+08	6.0505e+08	6.79148e+08	3.47323e+08	8.20928e+08	581903108	7.07955e+08	8.90054e+08	4.52272e+08	5.71368e+08	4.31263e+08	0.641948
Q9D892	Inosine triphosphate pyrophosphatase OS=Mus musculus OX=10090 GN=Itpa PE=1 SV=2 - [ITPA_MOUSE]	100	1	7	24	294	3.22193e+08	2.14408e+08	2.01222e+08	2.45365e+08	2.03535e+08	3.11107e+08	3.23183e+08	4.96765e+08	2.78913e+08	183902559	3.07951e+08	3.75766e+08	3.90347e+08	3.5004e+08	2.72509e+08	2.15588e+08	2.54857e+08	2.27716e+08	5.09039e+08	5.65566e+08	2.21454e+08	2.31097e+08	2.38029e+08	1.89548e+08	2.82715e+08	2.57783e+08	4.05756e+08	3.0066e+08	577840230	2.7726e+08	2.09694e+08	296973185	4.0697e+08	3.37731e+08	4.53751e+08	4.14788e+08	3.1788e+08	4.04856e+08	2.37344e+08	3.18774e+08	3.39323e+08	3.54553e+08	1.42966
Q9R0Y5	Adenylate kinase isoenzyme 1 OS=Mus musculus OX=10090 GN=Ak1 PE=1 SV=1 - [KAD1_MOUSE]	100	1	19	37	979	1953671442	1313653714	1.30429e+09	1.43248e+09	1.0491e+09	2.12602e+09	1.87023e+09	1.40796e+09	1.65478e+09	9.46086e+08	1.42636e+09	1.94387e+09	1.55035e+09	1.94659e+09	1.71779e+09	1339244036	1.19558e+09	1.52924e+09	1546623983	2.06289e+09	1.11786e+09	1.15992e+09	1.69361e+09	1.48747e+09	1.37777e+09	1.60435e+09	2.34309e+09	1.8474e+09	2.4706e+09	1.60804e+09	1.12605e+09	1.52902e+09	1.71137e+09	2.19722e+09	1.60235e+09	2.99063e+09	1.64751e+09	2.12031e+09	1.41064e+09	1.60101e+09	1.71699e+09	1.53471e+09	1.21717
Q9WVL0	Maleylacetoacetate isomerase OS=Mus musculus OX=10090 GN=Gstz1 PE=1 SV=1 - [MAAI_MOUSE]	100	1	7	27	217	35693796	1.80969e+07	3.17127e+07	4.94467e+07	3.25467e+07	4.76434e+07	6.73578e+07	3.56996e+07	4.07475e+07	2.10373e+07	4.12929e+07	6.13466e+07	3.97067e+07	8.00909e+07	48866756	4.4616e+07	4.352e+07	4.37977e+07	4.70861e+07	4.39839e+07	2.69801e+07	3.06345e+07	3.57517e+07	4.67091e+07	3.70216e+07	7.08986e+07	4.7496e+07	5.44717e+07	5.30369e+07	8.15089e+07	3.90077e+07	5.22748e+07	4.78391e+07	7.28884e+07	5.11727e+07	8.82453e+07	5.36423e+07	3.13284e+07	3.34994e+07	4.24971e+07	5.42608e+07	4.46007e+07	1.61976
Q3U898	COP9 signalosome complex subunit 9 OS=Mus musculus OX=10090 GN=Cops9 PE=1 SV=1 - [CSN9_MOUSE]	100	1	2	2	51	3.06528e+07	4.44338e+07	3.07008e+07	0	0	0	6.1978e+07	9.69564e+06	0	0	5.03848e+07	22951680	2.37993e+07	4.50546e+07	0	0	2.23733e+07	4.83355e+07	3.56776e+07	6.18426e+07	1.77871e+07	0	3.9595e+07	1.95324e+07	4.08193e+07	6.53501e+07	4.97498e+07	7.43971e+07	8.24173e+07	4.55724e+07	2.15437e+07	3.55931e+07	2.30781e+07	82200030	7.09889e+07	68375363	1.21857e+07	4.21774e+07	2.11575e+07	1.43347e+07	2.84381e+07	3.36458e+07	1.34412
Q62048	Astrocytic phosphoprotein PEA-15 OS=Mus musculus OX=10090 GN=Pea15 PE=1 SV=1 - [PEA15_MOUSE]	100	1	11	22	555	9.98591e+08	4.1669e+08	6.04444e+08	7.57705e+08	5.4871e+08	932757446	8.78617e+08	6.2857e+08	8.19757e+08	6.85876e+08	8.72541e+08	704542563	7.06318e+08	1.01311e+09	8.68272e+08	678741014	6.191e+08	7.98679e+08	8.78144e+08	1.03857e+09	6.50074e+08	6.09074e+08	7.17237e+08	6.27006e+08	7.89236e+08	6.90546e+08	765564388	9.37005e+08	1.16524e+09	7.95081e+08	6.07903e+08	8.07785e+08	9.34866e+08	7.99653e+08	6.77807e+08	968992534	9.64765e+08	9.18728e+08	6.65228e+08	7.89116e+08	8.32957e+08	8.02648e+08	1.25214
O70591	Prefoldin subunit 2 OS=Mus musculus OX=10090 GN=Pfdn2 PE=1 SV=2 - [PFD2_MOUSE]	100	1	7	25	175	2.42329e+08	1.41343e+08	1.27104e+08	1.53581e+08	1.03652e+08	227678811	2.00342e+08	160619390	2.99444e+08	8.70335e+07	1.92289e+08	2.53666e+08	1.26383e+08	1.30401e+08	1.02744e+08	1.38983e+08	1.6058e+08	8.14609e+07	1.72098e+08	2.09769e+08	1.4404e+08	1.57369e+08	1.3884e+08	1.47909e+08	1.86117e+08	1.85424e+08	2.31855e+08	1.04674e+08	1.19374e+08	1.86273e+08	1.30504e+08	1.68702e+08	1.00583e+08	2.36672e+08	1.74172e+08	2.25194e+08	4.00112e+08	1.82679e+08	1.53602e+08	1.95024e+08	1.61097e+08	1.52578e+08	1.0488
Q9WU28	Prefoldin subunit 5 OS=Mus musculus OX=10090 GN=Pfdn5 PE=1 SV=1 - [PFD5_MOUSE]	100	1	9	21	236	1.30504e+08	7.51361e+07	2.68859e+08	1.44445e+08	4.5547e+07	1.91038e+08	7.81743e+07	1.44917e+08	7.24991e+07	90240803	1.61374e+08	1.33003e+08	6.37963e+07	1.70277e+08	1.33283e+08	9.14636e+07	1.15888e+08	1.33267e+08	1.45112e+08	2.34009e+08	119751910	1.12551e+08	7.41879e+07	1.55353e+08	1.12872e+08	1.18558e+08	2.318e+08	6.79784e+07	1.09016e+08	1.16137e+08	7.40946e+07	1.65349e+08	1.99234e+08	223491970	7.37908e+07	2.25865e+08	1.70952e+08	2.06423e+08	1.32898e+08	1.15374e+08	1.32347e+08	1.43948e+08	0.99585
Q9CWW6	Peptidyl-prolyl cis-trans isomerase NIMA-interacting 4 OS=Mus musculus OX=10090 GN=Pin4 PE=1 SV=1 - [PIN4_MOUSE]	100	1	2	22	61	4.66201e+08	1.14065e+07	6.77404e+07	4.46604e+07	3.69143e+07	8.39871e+06	1.19281e+08	5.11081e+07	1.70756e+08	3.93068e+07	420477592	6.33526e+07	6.23635e+07	92528739	43842535	1.01402e+07	6.69307e+07	7.65437e+07	1.43136e+08	38044390	1.90319e+07	1.44985e+07	4.28289e+07	6.99012e+07	0	1.01191e+08	1.20001e+08	1.12538e+08	37268694	20967818	21262684	2.47093e+07	1.62901e+07	2.9386e+08	9.43568e+07	8.5473e+07	4.72332e+07	26299297	1.25384e+08	77770063	1.36513e+08	6.69589e+07	1.08876
Q60829	Protein phosphatase 1 regulatory subunit 1B OS=Mus musculus OX=10090 GN=Ppp1r1b PE=1 SV=2 - [PPR1B_MOUSE]	100	2	12	26	299	8.19262e+08	490067484	1.52807e+08	2.12658e+08	1.48532e+08	7.87159e+08	5.02895e+08	3.5424e+08	1.64458e+08	9.33671e+07	7.52625e+08	7.95518e+08	1.84062e+08	3.06944e+08	5.43763e+08	5.47347e+08	3.21948e+08	203023506	441712568	2.58108e+08	1.67193e+08	2.37332e+08	1.20685e+08	231340825	7.23758e+08	8.67434e+08	4.10794e+08	1.7745e+08	5.19614e+08	8.58522e+08	1.35127e+08	2.03842e+08	2.35117e+08	9.02615e+08	7.03545e+08	6.95273e+08	5.33018e+08	5.09232e+08	3.64665e+08	3.80424e+08	5.16582e+08	3.54428e+08	1.41659
O08709	Peroxiredoxin-6 OS=Mus musculus OX=10090 GN=Prdx6 PE=1 SV=3 - [PRDX6_MOUSE]	100	1	17	36	1063	2.88204e+09	1811087251	1.79533e+09	2296556059	1.71899e+09	2.91787e+09	2.7881e+09	2.25531e+09	2.40089e+09	1.3823e+09	2.45425e+09	3.26644e+09	2.06953e+09	3.2009e+09	2.69764e+09	2.28156e+09	1945225601	2.05141e+09	2.54602e+09	2.907e+09	2.10779e+09	2.30412e+09	2.07732e+09	2.21065e+09	2.53869e+09	2.84711e+09	3.33948e+09	2743105299	2.88914e+09	2.65422e+09	1.98722e+09	2.60506e+09	2.79221e+09	3.28205e+09	2.37536e+09	4.2241e+09	2.63247e+09	2.5703e+09	2.1008e+09	2.3489e+09	2.73775e+09	2.34625e+09	1.30319
P35282	Ras-related protein Rab-21 OS=Mus musculus OX=10090 GN=Rab21 PE=1 SV=4 - [RAB21_MOUSE]	100	1	3	29	91	8.87783e+07	1.90125e+07	7.06259e+07	103803299	4.55376e+07	3.66593e+08	5.49224e+07	8.06907e+07	91104000	0	5.33715e+07	1.33274e+08	8.62497e+07	4.24044e+07	0	4.46622e+07	5.75149e+07	1.03906e+08	0	3.67874e+07	6.9755e+07	2.31262e+08	1.21162e+08	4.81867e+07	4.3934e+07	71340509	2.32608e+07	1.15001e+07	7.8309e+06	43117553	5.4994e+07	27435951	7.34592e+07	4.43351e+07	4.39132e+07	4.38114e+07	2.83048e+07	2.31707e+08	6.55515e+07	1.18662e+08	6.306e+07	4.85742e+07	0.961991
P35278	Ras-related protein Rab-5C OS=Mus musculus OX=10090 GN=Rab5c PE=1 SV=2 - [RAB5C_MOUSE]	100	1	6	31	263	1.92212e+08	1.23508e+08	1.14422e+08	1.34942e+08	7.36383e+07	1.96477e+08	212306396	1.35183e+08	1.22888e+08	6.33327e+07	1.51018e+08	2.44337e+08	1.39441e+08	1.53128e+08	1.70061e+08	1.50479e+08	1.11838e+08	1.33706e+08	152746216	1.3436e+08	2.0293e+08	1.25341e+08	9.82734e+07	6.73993e+08	1.25086e+08	1.65855e+08	184390420	1.49218e+08	3.12361e+08	1.38183e+08	4.18638e+08	1.04531e+08	1.339e+08	1.89026e+08	544415990	2.75523e+08	1.30972e+08	2.14217e+08	1.27744e+08	1.46037e+08	1.71597e+08	1.36626e+08	1.34328
Q9CZX8	40S ribosomal protein S19 OS=Mus musculus OX=10090 GN=Rps19 PE=1 SV=3 - [RS19_MOUSE]	100	1	10	40	912	8.60414e+08	4.18429e+09	3.9628e+09	1.18632e+09	1.21389e+09	6.53365e+09	5.0572e+09	2.06463e+09	4.64062e+09	2.7576e+09	9.62968e+08	2.25828e+08	1.18833e+09	2052010836	1.57354e+09	2.24609e+09	1.08526e+09	2.04501e+08	2.46264e+08	5.09285e+09	1.13123e+09	7.15343e+08	1.97397e+08	4.11032e+08	4.29737e+08	4.58899e+09	9.20159e+09	7.34251e+09	7.1597e+09	1414548287	1.64833e+08	1.65906e+09	5.50555e+09	2.19211e+08	3.85386e+09	4.55317e+08	3.95285e+09	1.41484e+09	2.28154e+09	4.21074e+09	1.20054e+09	1.77499e+09	0.526195
Q9CQR2	40S ribosomal protein S21 OS=Mus musculus OX=10090 GN=Rps21 PE=1 SV=1 - [RS21_MOUSE]	100	1	5	15	154	2.66515e+08	1.97405e+08	2.57593e+08	1.94538e+08	1.24901e+08	2.76098e+08	3.95301e+08	2.72852e+08	2.02503e+08	9.68e+07	1.84186e+08	2.28046e+08	1.68372e+08	2.36752e+08	238461190	552441093	3.14537e+08	2.70472e+08	2.30206e+08	2.63412e+08	1.27608e+08	1.74529e+08	1.54291e+08	1.91433e+08	1.26203e+08	3.13543e+08	2.67461e+08	1.90657e+08	2.35825e+08	3.1559e+08	1.19479e+08	2.16737e+08	2.28886e+08	1.86469e+08	1.23562e+08	3.16626e+08	2.25885e+08	2.46259e+08	2.0819e+08	2.48711e+08	2.11163e+08	3.26214e+08	1.01428
P36536	GTP-binding protein SAR1a OS=Mus musculus OX=10090 GN=Sar1a PE=1 SV=1 - [SAR1A_MOUSE]	100	1	3	22	136	64666984	2.34146e+08	6.40303e+07	8.93678e+07	7.0858e+07	7.36553e+07	1.05525e+08	4.5262e+07	2.15834e+08	5.91577e+07	8.26051e+07	8.9064e+07	5.38155e+07	7.85852e+07	8.46705e+07	6.10488e+07	2.06834e+07	6.64237e+07	140190354	1.20861e+08	4.84827e+07	3.69592e+07	3.28138e+08	5.7996e+07	5.44784e+07	9.04703e+07	9.54514e+07	92857619	91580115	106401030	5.21293e+07	3.5585e+08	5576968	1.0855e+08	87588063	1.61151e+08	1.04708e+08	8.37633e+07	1.04614e+08	9.98868e+07	7.77481e+07	8.18414e+07	0.743192
Q9JJU8	SH3 domain-binding glutamic acid-rich-like protein OS=Mus musculus OX=10090 GN=Sh3bgrl PE=1 SV=1 - [SH3L1_MOUSE]	100	1	9	16	215	2.12776e+08	1.27111e+08	7.72943e+07	1.16788e+08	5.06205e+07	2.04738e+08	1.09905e+08	1.37263e+08	9.61375e+07	9.17118e+07	9.89691e+07	1.0675e+08	9.03608e+07	1.68323e+08	1.4087e+08	1.3496e+08	1.43438e+08	8.53991e+07	1.55992e+08	2.10614e+08	8.66573e+07	1.20846e+08	9.9075e+07	145736934	1.25154e+08	144503164	1.78114e+08	101682069	1.84218e+08	1.32177e+08	6.5195e+07	9.94496e+07	1.55683e+08	183174304	1.4356e+08	2.14343e+08	1.80469e+08	1.6228e+08	1.16918e+08	1.27951e+08	1.21055e+08	1.46081e+08	1.03538
Q91VW3	SH3 domain-binding glutamic acid-rich-like protein 3 OS=Mus musculus OX=10090 GN=Sh3bgrl3 PE=1 SV=1 - [SH3L3_MOUSE]	100	1	4	14	176	1095988799	3.73982e+08	5.22309e+08	6.89867e+08	4.56482e+08	9.23101e+08	4.50781e+08	5.37384e+08	4.82601e+08	2.85057e+08	9.67272e+08	934070994	4.03313e+08	881126289	2.34405e+09	7.07764e+08	5.94497e+08	4.43731e+08	8.13093e+08	2.95064e+09	0	4.33748e+08	409910317	4.87657e+08	3.71061e+08	7.60033e+08	9.31014e+08	5.08336e+08	6.53378e+08	362642099	4.19611e+08	551470263	5.47816e+08	6.92331e+08	547861192	1.11423e+09	6.63312e+08	9.88704e+08	6.27726e+08	5.35785e+08	1.10597e+09	1.10194e+09	1.76186
P61957	Small ubiquitin-related modifier 2 OS=Mus musculus OX=10090 GN=Sumo2 PE=1 SV=1 - [SUMO2_MOUSE]	100	1	2	16	144	3.9747e+08	1.89202e+08	2.25082e+08	3.3769e+08	4.1487e+08	4.65376e+08	3.39524e+08	2.04102e+08	3.77562e+08	4.51623e+08	3.3852e+08	2.99194e+08	2.20117e+08	4.62169e+08	3.70801e+08	3.64831e+08	3.63772e+08	2.90762e+08	4.21889e+08	1.20242e+09	2.17416e+08	2.45443e+08	2.4891e+08	2.36405e+08	3.24825e+08	2.48025e+08	3.55678e+08	3.22051e+08	3.04651e+08	3.88168e+08	2.85477e+08	2.598e+08	7.052e+08	3.544e+08	2.89457e+08	3.69594e+08	4.63988e+08	3.0366e+08	3.12863e+08	3.67637e+08	3.3816e+08	5.28735e+08	1.08086
O55042	Alpha-synuclein OS=Mus musculus OX=10090 GN=Snca PE=1 SV=2 - [SYUA_MOUSE]	100	1	9	26	1022	5.52507e+09	3.06843e+09	2.42687e+09	3622970568	2.97855e+09	5551282556	6.04091e+09	3.55549e+09	3.99862e+09	2.98766e+09	5.79018e+09	6.05459e+09	3.08683e+09	4.29051e+09	2.70908e+09	4.15339e+09	2.88295e+09	3.73838e+09	4632758547	5.78952e+09	3722137937	4.326e+09	2.7024e+09	2.96035e+09	4919688676	4.54598e+09	5.62436e+09	4.15667e+09	5542457379	5014107681	3.85937e+09	4067983408	4.38198e+09	5288103305	3.9429e+09	5.90412e+09	4925709115	4.23893e+09	3.52438e+09	4.42679e+09	4.38624e+09	4.2394e+09	1.24454
P11031	Activated RNA polymerase II transcriptional coactivator p15 OS=Mus musculus OX=10090 GN=Sub1 PE=1 SV=3 - [TCP4_MOUSE]	100	1	5	34	231	5.99196e+08	3.13292e+08	2.30779e+08	2.73492e+08	1.91859e+08	535301481	5.09661e+08	3.52389e+08	3.13328e+08	1.83195e+08	4.59831e+08	5.27481e+08	3.27931e+08	4.73914e+08	2.77644e+08	3.02848e+08	3.76647e+08	3.24586e+08	3.93457e+08	3.27781e+08	263637890	3.65401e+08	3.14953e+08	3.84033e+08	3.50163e+08	3.74256e+08	5.61713e+08	2.7043e+08	4.69886e+08	3.72386e+08	2.45333e+08	2.8457e+08	3.44234e+08	4.79096e+08	3.94801e+08	530945949	4.05827e+08	4.87586e+08	3.21724e+08	3.78775e+08	4.1336e+08	3.45064e+08	1.28483
Q9JME7	Trafficking protein particle complex subunit 2-like protein OS=Mus musculus OX=10090 GN=Trappc2l PE=1 SV=1 - [TPC2L_MOUSE]	100	1	2	14	42	3.77807e+07	1.2535e+08	0	4.38107e+07	3.03726e+07	5.13511e+07	24760220	0	5.16002e+07	0	0	1.14214e+08	2.10716e+07	0	4.73885e+07	3.09011e+07	3.59219e+07	3.49223e+07	4.35181e+06	0	2.94651e+07	0	0	206091963	1.12685e+08	6.43328e+07	9.67403e+07	52454759	3.94802e+07	2.02917e+07	0	0	118564927	9.67899e+06	31622536	8.62361e+07	208554024	0	4.74628e+07	2.55423e+07	3.65348e+07	2.12194e+07	0.769756
Q9Z1G3	V-type proton ATPase subunit C 1 OS=Mus musculus OX=10090 GN=Atp6v1c1 PE=1 SV=4 - [VATC1_MOUSE]	100	2	36	79	1327	9.02876e+08	6.8272e+08	5.54358e+08	6.9494e+08	506341364	9.43971e+08	9.81796e+08	1.33227e+09	6.24617e+08	4.24086e+08	7.92878e+08	1.10111e+09	7.06287e+08	7.6908e+08	5.90697e+08	6.5573e+08	5.02868e+08	5.82141e+08	644291545	8.54436e+08	542666263	5.32208e+08	6.87069e+08	7.46832e+08	6.33334e+08	6.9301e+08	1.02799e+09	8.86246e+08	8.66187e+08	7.3877e+08	5.78486e+08	6.50619e+08	7.56044e+08	1.20472e+09	7.82982e+08	1.44309e+09	7.12772e+08	8.78471e+08	6.68247e+08	8.61348e+08	7.9201e+08	6.47893e+08	1.1852
Q9D1K2	V-type proton ATPase subunit F OS=Mus musculus OX=10090 GN=Atp6v1f PE=1 SV=2 - [VATF_MOUSE]	100	1	11	19	643	8.02267e+08	5.35994e+08	443251635	6.03472e+08	3.99175e+08	7.57117e+08	7.21684e+08	604313976	5.94726e+08	3.50257e+08	6.18473e+08	796975814	5.60996e+08	6.59837e+08	4.38711e+08	6.01435e+08	4.78118e+08	4.71091e+08	6.32704e+08	7.48585e+08	4.89647e+08	5.00008e+08	4.57623e+08	6.5825e+08	5.98573e+08	5.12302e+08	7.97923e+08	7.26001e+08	7.78738e+08	6.39531e+08	5.12652e+08	659404199	6.66515e+08	7.40532e+08	564601490	1.10839e+09	7.82298e+08	7.77086e+08	5.56832e+08	6.0562e+08	6.14999e+08	5.86386e+08	1.10446
O70139	cAMP-dependent protein kinase inhibitor gamma OS=Mus musculus OX=10090 GN=Pkig PE=1 SV=1 - [IPKG_MOUSE]	100	1	1	7	29	0	36251391	0	0	0	0	4.50454e+06	0	0	0	0	60129786	12356021	0	2.08134e+06	2.92685e+07	0	0	0	4.41079e+07	0	46392310	0	2.33555e+07	0	50061502	6.36893e+07	0	8.0286e+06	41233315	0	2.08904e+07	0	6.49842e+07	4.06961e+07	87138714	39479781	1.2392e+07	7.25028e+06	900908	1.49134e+07	1.46753e+07	2.05695
P08207	Protein S100-A10 OS=Mus musculus OX=10090 GN=S100a10 PE=1 SV=2 - [S10AA_MOUSE]	100	1	1	11	36	0	0	2.7951e+06	3.67893e+06	2.52673e+07	0	0	0	4.93891e+06	4.98941e+07	0	1.09435e+07	5.332e+06	8.58106e+06	0	0	5.69051e+07	1.26551e+07	5.59636e+06	55005958	1.41957e+06	2.30751e+06	3.07985e+07	550330	0	0	0	46507842	154207125	0	2.2668e+06	2.22215e+06	2.99841e+06	0	0	8.07962e+07	42442968	7.13833e+07	6.34826e+06	1.09666e+07	4.97131e+06	2.60325e+07	0.783098
Q91VM5	RNA binding motif protein, X-linked-like-1 OS=Mus musculus OX=10090 GN=Rbmxl1 PE=2 SV=1 - [RMXL1_MOUSE]	99.74	1	3	89	868	628376739	4.09677e+08	3.34069e+08	4.57884e+08	207317623	574637848	8.39854e+08	3.799e+08	3.06199e+08	2.22621e+08	4.30714e+08	6.12536e+08	6.03604e+08	4.85587e+08	4.83422e+08	4.2282e+08	4.25442e+08	3.88388e+08	3.88638e+08	621253795	3.47779e+08	3.89619e+08	4.48039e+08	3.79556e+08	3.74599e+08	4.92549e+08	1.02763e+09	4.14769e+08	4.45507e+08	6.99101e+08	2.4429e+08	3.08861e+08	5.44366e+08	9.88627e+08	5.79669e+08	6.68091e+08	4.29858e+08	477560279	4.07465e+08	4.64642e+08	5.23173e+08	4.49308e+08	1.28397
O88809	Neuronal migration protein doublecortin OS=Mus musculus OX=10090 GN=Dcx PE=1 SV=1 - [DCX_MOUSE]	99.73	1	2	58	288	3.8137e+08	1.06952e+08	1.20923e+08	1.6059e+08	1.00106e+08	2.35537e+08	2.45464e+08	1.47641e+08	1.23835e+08	146585823	3.06303e+08	2.53491e+08	3.07164e+08	2.00138e+08	1.96757e+08	3.7922e+08	1.12241e+08	1.62401e+08	1.83403e+08	2.40759e+08	1.75499e+08	61512600	1.66058e+08	1.15662e+08	2.55585e+08	1.65916e+08	2.56369e+08	1.88836e+08	2.24776e+08	2.07048e+08	1.39728e+08	2.25172e+08	1.93755e+08	2.26937e+08	1.46137e+08	3.53271e+08	1.79713e+08	1.75763e+08	1.73988e+08	1.79812e+08	2.52771e+08	2.15605e+08	1.4528
Q9D020	Cytosolic 5'-nucleotidase 3A OS=Mus musculus OX=10090 GN=Nt5c3a PE=1 SV=4 - [5NT3A_MOUSE]	99.7	1	10	38	173	1.26787e+09	5.53611e+08	3.46973e+07	4.27652e+07	4.32837e+08	8.3633e+08	8.40493e+08	1.94369e+08	5.64997e+08	3.18554e+07	1.0824e+09	804850017	195974337	769283988	6.13095e+08	2.23108e+07	4.69101e+07	2.59233e+08	7.23214e+08	1.03978e+09	1.39393e+09	1.43649e+08	2.36769e+08	6.94903e+08	7.24186e+08	7.49591e+08	7.98468e+08	6.51477e+08	9.71442e+08	7.27862e+08	3.30079e+07	1.4711e+08	5.59194e+07	1.53818e+08	1.7992e+08	9.40398e+08	1.10922e+09	8.46733e+08	4.66355e+08	4.93609e+08	6.93121e+08	4.1829e+08	1.48625
Q8C854	Myelin expression factor 2 OS=Mus musculus OX=10090 GN=Myef2 PE=1 SV=1 - [MYEF2_MOUSE]	99.66	2	25	89	801	4.07069e+08	2.74274e+08	3.19431e+08	2.48727e+08	1.58241e+08	3.76738e+08	3.36952e+08	3.79518e+08	1.9594e+08	2.46896e+08	2.70422e+08	4.87688e+08	1.61606e+08	2.55703e+08	4.12177e+08	2.6862e+08	2.59847e+08	2.2524e+08	5.89978e+08	2.99437e+08	1.99908e+08	2.1632e+08	2.0611e+08	2.54551e+08	2.52644e+08	3.36067e+08	6.31984e+08	5.38294e+08	2.7657e+08	4.14456e+08	2.8619e+08	4.1756e+08	2.56572e+08	3.85393e+08	2.97022e+08	4.80191e+08	2.56228e+08	2.95105e+08	2.81548e+08	3.07209e+08	3.17519e+08	3.28625e+08	1.12776
O35658	Complement component 1 Q subcomponent-binding protein, mitochondrial OS=Mus musculus OX=10090 GN=C1qbp PE=1 SV=1 - [C1QBP_MOUSE]	99.64	1	3	25	190	2.55794e+08	2.65823e+08	3.11434e+08	2.57863e+08	3.00357e+08	2.59292e+08	470561100	228214180	4.25644e+08	1.32446e+08	2.24819e+08	2.63772e+08	1.65786e+08	3.02922e+08	391302149	1.78117e+08	1.21661e+08	176499076	2.28876e+08	2.35189e+08	3.67902e+08	1.25053e+08	1.80442e+08	286381022	410771553	4.38048e+08	504762348	1.528e+09	272434704	1.33121e+08	1.91546e+08	2.39976e+08	1.54784e+08	2.26652e+08	1.68755e+08	834131960	1052883602	2.30608e+08	2.78254e+08	3.03231e+08	2.6972e+08	1.88068e+08	0.96933
P68510	14-3-3 protein eta OS=Mus musculus OX=10090 GN=Ywhah PE=1 SV=2 - [1433F_MOUSE]	99.59	2	19	42	2184	2.65187e+10	1.59423e+10	1.75815e+10	21818681506	1.5552e+10	2.29781e+10	2.35539e+10	1.96161e+10	2.44468e+10	1.30849e+10	2.32673e+10	2.4853e+10	2.09641e+10	2.6761e+10	2.07338e+10	1.79422e+10	1.81804e+10	1.83401e+10	2.57754e+10	2.64442e+10	1.76852e+10	1.93199e+10	18641620081	2.20422e+10	2.16286e+10	1.83083e+10	3.20535e+10	22267407653	2.71036e+10	19968238938	1.70764e+10	2.10739e+10	2.36483e+10	2.06737e+10	1.76526e+10	2.8485e+10	2.83758e+10	2.71223e+10	1.94826e+10	2.07359e+10	2.33158e+10	2.13365e+10	1.19675
P63101	14-3-3 protein zeta/delta OS=Mus musculus OX=10090 GN=Ywhaz PE=1 SV=1 - [1433Z_MOUSE]	99.59	1	21	49	4056	2.78782e+10	1.88914e+10	1.96878e+10	24140748439	1.73096e+10	2.63366e+10	2.5897e+10	2.32016e+10	2.72606e+10	1.52532e+10	2.55387e+10	2.96281e+10	2.36852e+10	3.00783e+10	2.29177e+10	2.0123e+10	2.16736e+10	2.06414e+10	2.84362e+10	30729386143	2.06198e+10	2.27775e+10	2.04712e+10	2.57486e+10	2.34834e+10	2.19423e+10	3.78861e+10	2.50742e+10	2.88836e+10	2.26647e+10	1.92799e+10	2.4126e+10	2.73378e+10	2.45672e+10	1.97672e+10	3.36534e+10	3.07826e+10	3.09576e+10	2.15816e+10	2.35898e+10	2.63696e+10	2.43207e+10	1.22186
P09411	Phosphoglycerate kinase 1 OS=Mus musculus OX=10090 GN=Pgk1 PE=1 SV=4 - [PGK1_MOUSE]	99.52	2	34	68	2342	7068091603	4.37853e+09	4.4066e+09	5347724128	4324590755	6.56659e+09	6.76214e+09	5389575605	5.39266e+09	3.72139e+09	6.16037e+09	7.70737e+09	5.04667e+09	7.14089e+09	6.24127e+09	5260924838	5.60442e+09	5.31209e+09	6.38034e+09	7.01656e+09	4.97781e+09	6.18534e+09	4.96559e+09	4.8072e+09	5.66954e+09	5.82028e+09	7071435000	6.43371e+09	6.75366e+09	6.22089e+09	4.96974e+09	6.29178e+09	6.81395e+09	7.05458e+09	5.53894e+09	8.76259e+09	6.01075e+09	6.37936e+09	5.10511e+09	5.56647e+09	6.45932e+09	5.91487e+09	1.26527
P61027	Ras-related protein Rab-10 OS=Mus musculus OX=10090 GN=Rab10 PE=1 SV=1 - [RAB10_MOUSE]	99.5	7	6	32	397	1.96687e+09	1252212783	1.09719e+09	1.34575e+09	8.96883e+08	1.91353e+09	2.36969e+09	1.42616e+09	1.38544e+09	6.1657e+08	1905665749	2.72363e+09	1.42785e+09	1.89916e+09	1307937052	1.41104e+09	1.0332e+09	1.15669e+09	1502239676	1.51625e+09	9.69804e+08	1.11483e+09	9.72626e+08	1.51045e+09	1.63589e+09	1.44148e+09	1.93404e+09	1.52566e+09	1.87756e+09	1.52885e+09	9.15313e+08	1.07351e+09	1.4343e+09	1661219976	1.48809e+09	3.00222e+09	1.59164e+09	1.8195e+09	1.31178e+09	1.54228e+09	1.85285e+09	1.32388e+09	1.41247
Q9CQW2	ADP-ribosylation factor-like protein 8B OS=Mus musculus OX=10090 GN=Arl8b PE=1 SV=1 - [ARL8B_MOUSE]	99.46	1	4	26	130	1.78487e+07	7.64781e+07	94242668	1.17377e+08	9.5533e+07	1.57805e+08	44472995	61211443	1.23358e+08	6.15171e+07	1.05405e+08	2.17789e+07	1.12589e+08	1.85312e+08	5.91139e+07	2.17237e+07	90061833	5.74236e+07	1.39994e+08	1.58105e+08	62208936	0	8.6884e+07	1.3015e+08	1.0311e+08	158721319	1.58565e+08	1.27825e+08	8.75303e+07	9.1969e+07	4.59893e+07	8.38509e+07	1.00303e+08	1.30455e+08	190311712	2.74575e+08	3.73228e+06	8.55827e+07	8.0296e+07	8.9673e+07	9.68398e+07	9.34616e+07	1.20604
P62141	Serine/threonine-protein phosphatase PP1-beta catalytic subunit OS=Mus musculus OX=10090 GN=Ppp1cb PE=1 SV=3 - [PP1B_MOUSE]	99.39	1	6	38	477	7.95766e+08	3.57378e+08	3.91528e+08	4.45301e+08	3.14355e+08	8.05305e+08	6.28304e+08	4.36788e+08	5.10387e+08	2.82263e+08	6.94552e+08	6.09281e+08	5.33451e+08	6.14332e+08	5.17478e+08	5.16125e+08	4.34639e+08	4.54107e+08	4.43132e+08	6.99705e+08	4.74078e+08	3.23085e+08	4.68706e+08	4.92785e+08	4.93797e+08	4.79434e+08	7.28683e+08	5.55288e+08	6.7403e+08	4.86713e+08	3.91346e+08	5.08979e+08	6.81237e+08	6.62636e+08	4.14393e+08	8.59569e+08	5.60342e+08	6.55406e+08	4.60866e+08	5.32609e+08	5.93819e+08	5.09541e+08	1.28849
Q9R0P5	Destrin OS=Mus musculus OX=10090 GN=Dstn PE=1 SV=3 - [DEST_MOUSE]	99.39	1	16	32	771	1.59925e+09	1.04097e+09	6.48779e+08	7.95118e+08	5.38534e+08	1.54821e+09	1.14302e+09	6.95177e+08	9.19983e+08	652948872	1.21939e+09	1.10593e+09	7.61863e+08	1.28325e+09	8.15215e+08	1.083e+09	7.11507e+08	9.37801e+08	1093780355	1.30495e+09	9.07829e+08	9.25882e+08	1.0005e+09	1.14902e+09	1.0778e+09	8.72608e+08	1.15078e+09	1.24854e+09	1.2067e+09	8.55626e+08	7.08737e+08	7.06447e+08	1.26772e+09	1.64118e+09	8.52848e+08	1.72908e+09	1.37951e+09	1444603714	9.24529e+08	9.91869e+08	1.03713e+09	1.02621e+09	1.12179
Q8C4W3	Neuritin-like protein OS=Mus musculus OX=10090 GN=Nrn1l PE=2 SV=2 - [NRN1L_MOUSE]	99.38	1	1	14	59	3870678	2980862	0	0	77974988	168860113	158439061	0	1.50051e+08	64767802	0	299063841	0	0	0	0	6.87973e+07	156895461	137115551	1.25806e+07	15204144	0	0	2.12721e+08	0	0	0	0	0	0	0	0	5.22529e+07	0	2.42563e+08	0	2.76322e+08	183754954	1.69653e+07	1.08424e+08	5.98128e+07	7.50778e+07	3.52559
Q9CQ25	Mitotic-spindle organizing protein 2 OS=Mus musculus OX=10090 GN=Mzt2 PE=1 SV=1 - [MZT2_MOUSE]	99.37	1	1	19	90	215029037	1.03904e+08	3.31685e+07	1.97569e+07	3.21289e+07	2.02115e+08	2.04142e+07	1.38261e+08	1.04039e+08	268640816	1.95693e+08	259790527	0	1.60308e+08	2.27016e+08	9.66712e+07	182208568	0	1.91754e+08	1.22457e+08	7.74076e+07	326438885	0	2.02985e+08	223390585	6.17408e+07	1.21963e+08	1.07843e+08	1.85784e+06	1.24193e+08	1.43393e+08	4.39212e+07	208204755	8.36489e+07	2.50793e+08	7.29418e+07	9.93408e+07	286979667	8.07975e+07	1.46694e+08	1.68561e+08	1.18618e+08	2.08622
P56380	Bis(5'-nucleosyl)-tetraphosphatase [asymmetrical] OS=Mus musculus OX=10090 GN=Nudt2 PE=1 SV=3 - [AP4A_MOUSE]	99.32	1	7	17	127	6.03454e+07	2.87132e+07	5.5739e+07	6.61705e+07	3.28039e+07	3.5546e+07	96530244	4.56361e+07	6.8e+07	5.16681e+07	1.06437e+08	1.9386e+07	6.18778e+07	9.78095e+07	7.12459e+07	6.38338e+07	3.66183e+07	6.14135e+07	6.97843e+07	1.13029e+08	4.39789e+07	4.72465e+07	4.85268e+07	4.17335e+07	6.21593e+07	1.68786e+07	4.66117e+07	9.78236e+07	1.1182e+08	6.20447e+07	6.06897e+07	55274934	3.52334e+07	2.1596e+06	0	1.06662e+08	5.40816e+07	6.67935e+07	4.87544e+07	5.94761e+07	7.13512e+07	6.89358e+07	1.46348
Q61316	Heat shock 70 kDa protein 4 OS=Mus musculus OX=10090 GN=Hspa4 PE=1 SV=1 - [HSP74_MOUSE]	99.29	1	51	140	2251	1.27446e+09	8.88163e+08	1.45187e+09	1642960312	2.26123e+09	1.17189e+09	2.9446e+09	9.23095e+08	2.1938e+09	1774836361	2.7035e+09	1.69445e+09	6.48574e+08	1.25746e+09	8.02451e+08	2.86531e+09	8.25366e+08	679222150	2.25857e+09	2210346461	1.55262e+09	8.33482e+08	720508089	1.51042e+09	1968860212	3.13059e+09	2.33002e+09	2.19964e+09	1160032052	2.27138e+09	1.48521e+09	1.55844e+09	1822585010	2.912e+09	2.12215e+09	4.10941e+09	2.28172e+09	1.06874e+09	1.50374e+09	1.80164e+09	1.42129e+09	1.76776e+09	0.945169
Q9QXA5	U6 snRNA-associated Sm-like protein LSm4 OS=Mus musculus OX=10090 GN=Lsm4 PE=1 SV=1 - [LSM4_MOUSE]	99.27	1	4	24	141	8.89144e+07	1.05262e+08	4.10935e+07	7.32889e+07	3.05155e+07	7.43448e+07	1.2809e+08	4.7529e+07	9.63023e+07	3.08947e+07	7.49113e+07	7.63134e+07	3.48125e+07	6.09638e+07	57376345	7.19009e+07	8.5117e+07	6.35233e+07	5.37393e+07	8.19826e+07	5.46051e+07	100753590	2.61065e+07	9.16112e+07	4.84639e+07	7.2363e+07	6.67736e+07	5.40516e+07	5.37757e+07	131291174	5.23302e+07	1.05625e+08	4.8488e+07	9.16918e+07	6.46388e+07	9.18736e+07	8.21892e+07	87897440	6.78148e+07	7.54322e+07	6.08755e+07	7.12526e+07	0.897673
P63040	Complexin-1 OS=Mus musculus OX=10090 GN=Cplx1 PE=1 SV=1 - [CPLX1_MOUSE]	99.25	1	6	26	740	2.36659e+09	1.64409e+09	1.279e+09	1.78238e+09	1.32822e+09	2.76715e+09	2.79927e+09	1.9343e+09	1.85958e+09	1.06256e+09	2098215803	2913707699	1.55494e+09	2.37896e+09	1.78327e+09	2142814763	2.09945e+09	1.60231e+09	2.13588e+09	2.45284e+09	1659311400	1.87683e+09	1.47305e+09	1.79776e+09	2.15982e+09	2.31525e+09	2.96053e+09	1.93304e+09	2.3202e+09	2.04129e+09	1.60599e+09	2.03233e+09	2.17917e+09	2890404069	2.15902e+09	3.52819e+09	1.77257e+09	2.45436e+09	1680056290	2.08457e+09	2.14582e+09	2.08666e+09	1.27723
Q9JMA1	Ubiquitin carboxyl-terminal hydrolase 14 OS=Mus musculus OX=10090 GN=Usp14 PE=1 SV=3 - [UBP14_MOUSE]	99.19	2	25	75	698	2.48943e+08	1.85146e+08	1.51399e+08	2.62662e+08	1.67871e+08	3.26159e+08	3.29224e+08	2.6034e+08	8.32424e+08	3.78716e+08	2.13695e+08	3.91328e+08	2.50787e+08	3.00634e+08	2.71453e+08	1.26647e+08	2.44695e+08	148716108	287777706	2.79701e+08	1.67705e+08	1.73567e+08	6.22061e+08	7.79805e+08	1.8005e+08	3.06921e+08	3.88433e+08	2.5953e+08	313508169	2.58056e+08	1.185e+08	1.73016e+08	8.04123e+08	281118984	2.47294e+08	4.14849e+08	2.95909e+08	301078839	2.03204e+08	4.25373e+08	2.8558e+08	2.17507e+08	1.40538
P17182	Alpha-enolase OS=Mus musculus OX=10090 GN=Eno1 PE=1 SV=3 - [ENOA_MOUSE]	99.08	1	29	70	8401	15411925070	1.4567e+10	1.16799e+10	1.28102e+10	9.37341e+09	1.86185e+10	1.65125e+10	16723211192	1.38023e+10	8.76498e+09	1.43843e+10	2.27278e+10	1.25647e+10	1.68806e+10	1.30056e+10	1.26762e+10	1.58064e+10	1.21665e+10	1.57603e+10	1.66824e+10	1.21846e+10	14098686449	1.17064e+10	1.58209e+10	1.29278e+10	17253761528	2.16141e+10	1.35952e+10	1.67036e+10	1.52556e+10	11090180617	1.38115e+10	1.44988e+10	2.10584e+10	13980056292	2.41917e+10	1.58135e+10	17636178182	1.27685e+10	1.48843e+10	1.59126e+10	1.46184e+10	1.24624
P61294	Ras-related protein Rab-6B OS=Mus musculus OX=10090 GN=Rab6b PE=1 SV=1 - [RAB6B_MOUSE]	99.04	4	5	32	473	1.92343e+09	1.1463e+09	1.02909e+09	1265072735	7.72833e+08	1.90692e+09	1.88933e+09	1.28155e+09	1.2177e+09	5.78551e+08	1.29811e+09	2.08057e+09	1.25891e+09	1.43286e+09	1.2037e+09	1.35948e+09	9.30907e+08	1.07756e+09	1304444537	1.43848e+09	9.15336e+08	1.06064e+09	9.09452e+08	1.3658e+09	1032561490	1.38286e+09	1.65341e+09	1.13459e+09	1.29887e+09	1.44081e+09	8.63025e+08	1.00242e+09	1.29336e+09	1.5784e+09	1.39552e+09	2.62703e+09	1.4865e+09	1.69561e+09	1.22734e+09	1.37481e+09	1.45483e+09	1.22217e+09	1.18535
P30275	Creatine kinase U-type, mitochondrial OS=Mus musculus OX=10090 GN=Ckmt1 PE=1 SV=1 - [KCRU_MOUSE]	99.04	2	18	61	866	4.27437e+09	1.63911e+09	1.83095e+09	2.7563e+09	1.66561e+09	3019602069	4.15872e+09	1.99269e+09	2635112625	2.04278e+09	3.45333e+09	2.38613e+09	2.53505e+09	3.78928e+09	2873516513	2.49049e+09	2.18996e+09	2.73004e+09	2.62571e+09	3.34368e+09	2.2781e+09	1.71776e+09	2.03923e+09	2.63726e+09	3.42395e+09	2.27698e+09	3.15026e+09	4.01909e+09	3.89819e+09	2.2192e+09	1.98237e+09	2.09664e+09	3.50401e+09	2.55817e+09	2.9439e+09	2.75684e+09	4015273088	4.32239e+09	2.43327e+09	2.76978e+09	3.00746e+09	2.67598e+09	1.23598
P35279	Ras-related protein Rab-6A OS=Mus musculus OX=10090 GN=Rab6a PE=1 SV=4 - [RAB6A_MOUSE]	99.04	4	6	35	436	1.92343e+09	1.1463e+09	1.02909e+09	1265072735	7.72833e+08	1.79986e+09	2.49168e+09	1.28155e+09	1.2177e+09	5.78551e+08	1.29811e+09	2.08057e+09	1.25891e+09	1.43286e+09	1.2037e+09	1.33537e+09	9.30907e+08	1.07756e+09	1304444537	1.43848e+09	9.15336e+08	1.06064e+09	9.09452e+08	1.3658e+09	1032561490	1.38286e+09	1636717918	1.13459e+09	1.29887e+09	1.44081e+09	8.63025e+08	9.75424e+08	1.29295e+09	1.5784e+09	1.39552e+09	2.62703e+09	1.4865e+09	1.69561e+09	1.22734e+09	1.47387e+09	1.45483e+09	1.21735e+09	1.18535
P46660	Alpha-internexin OS=Mus musculus OX=10090 GN=Ina PE=1 SV=3 - [AINX_MOUSE]	99	1	26	77	957	4.05666e+08	1135341199	6.42735e+08	9.03194e+08	7.9562e+08	1930043271	1.20395e+09	755603765	3.82597e+08	7.95904e+08	2.50912e+08	6.41504e+08	1.03084e+09	1.45928e+09	4.5186e+08	1.32383e+09	3.92986e+08	2.55741e+08	4.69818e+08	6.38265e+08	2.11319e+08	9.0107e+08	543325865	2.01885e+08	5.61307e+08	1.2503e+09	4.85756e+08	7.30003e+08	6.40908e+08	9.78134e+08	3.0702e+08	5.37164e+08	3.42268e+08	9.37835e+08	1.1864e+09	1.42991e+09	1.16243e+09	3.44935e+08	7.76511e+08	1.01362e+09	7.66881e+08	6.16127e+08	0.987598
P37804	Transgelin OS=Mus musculus OX=10090 GN=Tagln PE=1 SV=3 - [TAGL_MOUSE]	99	1	8	28	288	6.95984e+07	7.66637e+07	1.16591e+08	1.4101e+08	7.24631e+07	8.31291e+07	1.78341e+08	1.31193e+08	9.91772e+07	1.08603e+08	1.70248e+08	228799522	1.29402e+08	1.71105e+08	7.46033e+07	4.78993e+07	4.55213e+07	8.51291e+07	1.4381e+08	1.14515e+08	7.6626e+07	2.83558e+07	9.00147e+07	1.19679e+08	85178014	95296105	1.33826e+08	1.19329e+09	2.47671e+08	1.27123e+08	7.57036e+07	1.25736e+08	1.55772e+08	2.86007e+08	1.67546e+08	2.27498e+08	2.02705e+08	2.40277e+08	9.52653e+07	1.20089e+08	1.54832e+08	8.7375e+07	1.62527
Q3SXD3	5'-deoxynucleotidase HDDC2 OS=Mus musculus OX=10090 GN=Hddc2 PE=1 SV=1 - [HDDC2_MOUSE]	98.99	1	2	27	124	7.01017e+08	1.06962e+09	2152282720	1.5786e+09	1.35927e+09	1.85464e+09	9.57158e+07	3.16372e+07	1.23058e+09	4.18337e+08	1.57595e+08	2.34206e+09	1287958995	3285956691	1.50341e+09	7.64688e+06	1.57743e+09	1.93978e+09	5250990260	2.66508e+09	1991455650	1.8106e+07	3.53795e+08	6.86607e+07	1.56018e+09	3.20653e+07	9.25211e+08	2.26126e+09	2.10162e+09	2.88484e+08	2.63108e+09	1.11376e+09	1.25881e+09	2.2783e+09	3471692197	9.07352e+07	2.57104e+09	1.059e+09	1.37216e+09	7.26182e+08	1.71539e+09	2.28819e+09	1.25014
Q9CYY7	PRELI domain containing protein 3B OS=Mus musculus OX=10090 GN=Prelid3b PE=1 SV=2 - [PLD3B_MOUSE]	98.97	1	1	19	80	3.17155e+08	2.45682e+08	3.75806e+08	1.43984e+09	3.71191e+07	1.96619e+08	2.04381e+09	395541815	8.23344e+09	2.80731e+09	2.68718e+09	3.23728e+09	5135141977	2.4128e+09	6.51569e+08	1.90923e+08	354331465	1.45221e+08	282237312	9094427756	4.32301e+08	5594167227	4.13623e+08	2.28806e+09	1.20003e+09	2.16777e+08	2.87317e+08	1.09753e+09	2.0685e+09	4.23434e+08	1.61371e+09	2.03115e+09	2.59282e+09	2.13412e+08	2.0469e+08	2.21234e+08	2.49755e+09	5.1854e+08	4.8312e+08	2.73534e+09	2.8248e+09	2.01343e+09	5.84698
Q61937	Nucleophosmin OS=Mus musculus OX=10090 GN=Npm1 PE=1 SV=1 - [NPM_MOUSE]	98.97	1	12	43	534	4.35338e+08	2.47449e+08	3.28425e+08	3.40405e+08	2.39873e+08	3.84102e+08	4.80953e+08	2.94073e+08	3.48145e+08	2.88261e+08	3.65512e+08	4.00968e+08	3.31979e+08	5.60623e+08	4.88732e+08	3.19131e+08	3.50556e+08	2.9884e+08	4.65227e+08	5.79599e+08	3.24645e+08	3.30679e+08	3.74745e+08	3.11609e+08	3.32347e+08	3.41404e+08	5.01795e+08	3.82207e+08	5.33134e+08	3.6528e+08	2.67743e+08	4.26762e+08	5.53268e+08	4.82884e+08	2.96658e+08	6.64366e+08	4.59744e+08	446520704	3.18298e+08	3.59107e+08	4.29563e+08	4.02671e+08	1.34956
O35900	U6 snRNA-associated Sm-like protein LSm2 OS=Mus musculus OX=10090 GN=Lsm2 PE=1 SV=1 - [LSM2_MOUSE]	98.95	1	2	10	82	59326907	63298161	3.92541e+07	3.64801e+07	2.44104e+08	7.61529e+07	7.79622e+07	6.50032e+07	3.88861e+07	2.5127e+08	4.11434e+07	1.05928e+08	4.09667e+07	4.57367e+07	3.88701e+07	4.67105e+07	6.77126e+07	3.71156e+07	4.34827e+07	3.26966e+07	2.12897e+07	2.41143e+07	4.07712e+07	8.16646e+07	3.28916e+07	5.79493e+07	6.98952e+07	2.97446e+07	4.49635e+07	5.13681e+07	2.90433e+07	3.37611e+07	3.18211e+07	8.85317e+07	5.14351e+07	9.38795e+07	4.47709e+07	5.18622e+07	8.84927e+07	1.01855e+08	5.45291e+07	4.55436e+07	0.616198
P50114	Protein S100-B OS=Mus musculus OX=10090 GN=S100b PE=1 SV=2 - [S100B_MOUSE]	98.91	1	3	9	207	307452025	218954252	5.56143e+08	5.26947e+08	5.23829e+08	2.35089e+08	3.48919e+08	2.19484e+08	5.10015e+08	2.65839e+08	3.46103e+08	2.45719e+08	584529201	8.90423e+08	5.21611e+08	7.50628e+08	2.19965e+08	5.87075e+08	7.25173e+08	7.41769e+08	2.81732e+08	3.87855e+08	7.21377e+08	4.50609e+08	673418845	2.2935e+08	4.80073e+08	6.12661e+08	1.18507e+09	4.68524e+08	3.0108e+08	967725925	4.80007e+08	2.3857e+08	2.66882e+08	5.15422e+08	481584972	7.56139e+08	4.26665e+08	3.15869e+08	5.17677e+08	6.04922e+08	1.21331
Q9DC07	LIM zinc-binding domain-containing Nebulette OS=Mus musculus OX=10090 GN=Nebl PE=1 SV=1 - [LNEBL_MOUSE]	98.89	1	16	39	600	2.18865e+08	1.24171e+08	1.25192e+08	1.54637e+08	9.71356e+07	1.6911e+08	1.70187e+08	170229846	1.16493e+09	1.02634e+08	2.04338e+08	188884419	1.48914e+08	226802126	1.4944e+08	1.5516e+08	1.42442e+08	1.51034e+08	1.86198e+08	2.00307e+08	1.57412e+08	1.61499e+08	1.16361e+08	1.94683e+09	1.60316e+08	1.46645e+08	2.2421e+08	1.47307e+09	1.82283e+08	1.39459e+08	1.20733e+08	1.70671e+08	1.83296e+08	1.71782e+08	1.37854e+08	2.46113e+08	1.9636e+09	1.92333e+08	1.44e+08	3.55419e+08	1.83676e+08	1.67028e+08	1.27552
P62814	V-type proton ATPase subunit B, brain isoform OS=Mus musculus OX=10090 GN=Atp6v1b2 PE=1 SV=1 - [VATB2_MOUSE]	98.83	1	26	65	2905	3.61782e+09	2.46213e+09	2.3027e+09	2.75388e+09	2.07902e+09	3.41605e+09	3.3933e+09	2.93356e+09	2.72597e+09	1.74182e+09	3.05948e+09	4130977440	3.0964e+09	3.41704e+09	2.55437e+09	2.46254e+09	2.33271e+09	2.32681e+09	3129183067	3422128338	2592425584	2.82454e+09	2.37547e+09	2.90472e+09	2696122473	2.71482e+09	3.55335e+09	3274477147	3.57645e+09	3.14349e+09	2.62578e+09	3.1739e+09	3.59438e+09	5529039543	2.43204e+09	5.21823e+09	3.47282e+09	3.31e+09	2.64311e+09	2.84214e+09	3.25165e+09	2.73467e+09	1.23024
Q91WK5	Glycine cleavage system H protein, mitochondrial OS=Mus musculus OX=10090 GN=Gcsh PE=1 SV=2 - [GCSH_MOUSE]	98.82	1	3	17	84	1.5349e+08	9.40186e+07	6.68791e+07	69243335	53794226	1.89623e+08	173781819	1.12502e+08	1.15538e+08	51397236	133420532	254736719	6.20491e+07	6.23281e+07	1.03754e+08	107116335	7.26603e+07	5.58875e+07	9.13887e+07	1.22128e+08	0	108276149	6.93226e+07	1.55182e+08	1.41371e+08	1.16944e+08	1.11382e+08	6.72399e+07	5.46217e+07	2.69921e+08	6.24926e+07	7.92807e+07	115874777	2.71849e+08	7.76645e+07	1.74422e+08	1.39047e+08	1.24246e+08	8.74851e+07	1.28568e+08	1.23258e+08	8.98362e+07	1.4089
Q9CY57	Chromatin target of PRMT1 protein OS=Mus musculus OX=10090 GN=Chtop PE=1 SV=2 - [CHTOP_MOUSE]	98.8	1	3	57	295	1.45101e+08	9.74148e+07	1.69255e+07	4.1621e+08	8.28469e+07	213700709	1.15201e+08	3.02659e+08	4.03397e+08	2.05124e+08	3.73329e+08	500625338	1.95326e+07	3.95896e+08	6.90818e+08	4.13263e+08	1.11492e+08	2.83641e+08	3.42198e+08	1.51723e+09	1.02848e+08	2.22062e+08	2.51077e+08	2.69429e+08	3.08723e+08	2.65205e+08	1.94494e+08	3.12305e+08	1173879790	2.87566e+08	3.24521e+08	674024791	4.49926e+08	4.43602e+08	2.9653e+08	8.41211e+08	454823476	5.83061e+08	1.517e+08	2.48017e+08	3.9604e+08	5.33564e+08	2.61068
Q9D328	Novel acetylcholine receptor chaperone OS=Mus musculus OX=10090 GN=Tmem35a PE=1 SV=1 - [NACHO_MOUSE]	98.8	1	1	29	110	0	2.94279e+06	4.47216e+07	7.02202e+07	4.51206e+07	0	7.81073e+07	3.01038e+07	7.53074e+07	1.87646e+07	5.33032e+07	5.66295e+07	6.486e+07	7.14264e+07	7.69048e+07	2.58492e+07	2.29562e+07	3.20931e+08	1.22204e+08	9.936e+07	3.96537e+07	28643351	59815680	3.54893e+07	6.68389e+07	3.63114e+07	8.45721e+07	1.04798e+08	8.83451e+07	5.70389e+07	5.77896e+07	7.64206e+07	116077849	104911608	3.74112e+07	8.17534e+07	6.09396e+07	72763299	3.2601e+07	4.04566e+07	6.46248e+07	1.1826e+08	1.98229
Q9WUK2	Eukaryotic translation initiation factor 4H OS=Mus musculus OX=10090 GN=Eif4h PE=1 SV=3 - [IF4H_MOUSE]	98.79	1	12	43	525	5.86245e+08	5.38079e+08	4.18892e+08	4.31492e+08	3.42244e+08	5.56259e+08	8.00651e+08	2.20506e+08	5.84966e+08	1.56278e+08	5.08687e+08	7.50128e+08	4.36781e+08	6.78767e+08	5.08023e+08	5.09846e+08	2.72097e+08	4.40103e+08	3.85718e+08	5.84539e+08	2.72165e+08	2.80499e+08	4.66192e+08	2.7792e+08	517631522	4.69886e+08	1.00363e+09	6.27678e+08	7.0561e+08	6.19212e+08	495407765	5.67106e+08	6.14396e+08	8.29335e+08	6.3181e+08	1.28968e+09	3.73843e+08	8.24945e+08	4.6339e+08	4.63732e+08	5.76477e+08	4.38461e+08	1.24404
Q9R0Q7	Prostaglandin E synthase 3 OS=Mus musculus OX=10090 GN=Ptges3 PE=1 SV=1 - [TEBP_MOUSE]	98.75	1	6	15	205	3.76397e+08	8.42459e+07	5.05985e+07	9.75147e+07	1.08549e+08	3.35121e+08	2.50556e+08	1.68459e+08	1.55615e+08	7.47539e+07	345947865	8.62436e+07	1.52904e+08	1.27906e+08	8.81033e+07	2.97448e+08	1.24993e+08	1.11604e+08	1.62377e+08	1.41649e+08	2.36246e+08	7.73835e+07	1.50326e+08	1.28312e+08	2.05066e+08	1.339e+08	1.4626e+08	1.763e+08	2.00323e+08	298876433	1.36972e+08	1.44617e+08	1.6075e+08	1.16138e+08	1.16546e+08	1.43295e+08	1.12421e+08	1.88806e+08	1.43461e+08	1.96901e+08	1.60221e+08	1.67614e+08	1.11683
Q9CYT6	Adenylyl cyclase-associated protein 2 OS=Mus musculus OX=10090 GN=Cap2 PE=1 SV=1 - [CAP2_MOUSE]	98.74	1	27	57	920	9.24286e+08	7.09033e+08	5.11969e+08	6.83833e+08	4.72217e+08	9.96645e+08	8.14818e+08	871611250	6.94474e+08	431273998	8.04e+08	1.28615e+09	6.4639e+08	9.64633e+08	6.70913e+08	6.17681e+08	7.62391e+08	6.36956e+08	1.34755e+09	1.078e+09	7.79002e+08	7.93006e+08	5.06552e+08	7.946e+08	7.10764e+08	8.53285e+08	1.86927e+09	7.42817e+08	9.10386e+08	6.83227e+08	663280098	7.18401e+08	9.34345e+08	1.00292e+09	8.1767e+08	1282857321	9.43313e+08	9.48486e+08	6.60268e+08	7.61765e+08	8.74417e+08	8.88516e+08	1.32434
Q8CAY6	Acetyl-CoA acetyltransferase, cytosolic OS=Mus musculus OX=10090 GN=Acat2 PE=1 SV=2 - [THIC_MOUSE]	98.74	1	14	36	457	8.35776e+08	406120658	1.23838e+08	2.90238e+08	362700222	2.29129e+08	4.23904e+08	330515878	5.58583e+08	2.64308e+08	4.79294e+08	4.93855e+08	2.54194e+08	4.16166e+08	4.73529e+08	2.07248e+08	3.60622e+08	2.97379e+08	648859221	8.23155e+08	2.56743e+08	2.30039e+08	274429099	2.44657e+08	3.68947e+08	3.56658e+08	4.88705e+08	9.47373e+08	4.53989e+08	5.78745e+08	221103353	421263272	5.05543e+08	3.88426e+08	4.63009e+08	5.87843e+08	3.98738e+08	3.70853e+08	4.03735e+08	3.61288e+08	4.23408e+08	4.67453e+08	1.04873
Q8WTY4	Anamorsin OS=Mus musculus OX=10090 GN=Ciapin1 PE=1 SV=1 - [CPIN1_MOUSE]	98.71	1	9	34	258	126429970	7.22958e+07	9.98862e+07	1.2962e+08	7.98149e+07	1.42885e+08	1.57309e+08	8.12428e+07	80856127	9.28789e+07	1.41581e+08	7.15511e+07	1.37402e+08	1.53476e+08	1.06066e+08	1.11349e+08	63703972	1.13307e+08	1.29051e+08	9.48416e+07	1.01709e+08	8.9388e+07	8.72726e+07	6.81498e+07	1.15131e+08	1.09811e+08	119274941	1.37997e+08	1.75994e+08	1.35809e+08	8.68767e+07	1.17996e+08	2.76884e+08	2.04633e+08	1.22957e+08	2.3046e+08	1.17172e+08	1.28614e+08	1.01609e+08	1.11035e+08	1.22015e+08	1.02451e+08	1.20083
Q9CQZ1	Heat shock factor-binding protein 1 OS=Mus musculus OX=10090 GN=Hsbp1 PE=1 SV=1 - [HSBP1_MOUSE]	98.68	1	3	13	174	8.50589e+07	1.23627e+08	6.68692e+07	3.90964e+06	4.4793e+07	1.57658e+08	106705795	5.49488e+06	1.08991e+08	9529506	1.09142e+08	1.47586e+08	6.97091e+07	1.39274e+08	9.02541e+07	1.33587e+08	1.23887e+08	3.94255e+07	1.20259e+08	1.19801e+08	8.97509e+06	9.19438e+07	7.77068e+07	5.78982e+07	6.33875e+07	9.47156e+07	1.20982e+08	1.2945e+08	9.81766e+07	4.27038e+07	6.96036e+07	1.00956e+08	1.31377e+08	7.94325e+08	137600755	2.76912e+08	4.95751e+07	1.47685e+08	6.48515e+07	7.76759e+07	1.11193e+08	1.07392e+08	1.71458
P63248	cAMP-dependent protein kinase inhibitor alpha OS=Mus musculus OX=10090 GN=Pkia PE=1 SV=2 - [IPKA_MOUSE]	98.68	1	3	7	93	40796021	1.25425e+08	200871308	7.08744e+07	4.26619e+06	1.05692e+08	2.60878e+08	4.7808e+07	64382653	4.40671e+07	1.01715e+08	2.32831e+08	5.69846e+07	76066284	1.0324e+08	7.1839e+07	154138475	54054919	8.66294e+07	0	9.41706e+07	9.16809e+07	5.4948e+07	6.59649e+06	147227778	1.18921e+08	1.56222e+08	8.20035e+07	1.26668e+08	1.78464e+08	179132267	4.77373e+07	4.53013e+07	2.1784e+08	47989228	3.17035e+08	9.7347e+07	3.90857e+08	8.84466e+07	1.04566e+08	1.14167e+08	7.33324e+07	1.2908
P43276	Histone H1.5 OS=Mus musculus OX=10090 GN=H1-5 PE=1 SV=2 - [H15_MOUSE]	98.65	1	5	54	321	3.87338e+08	1.76098e+08	241716475	228549828	1.4479e+08	2.63563e+08	3.04724e+08	1.67128e+08	2.31413e+08	2.01742e+08	2.40552e+08	4.21923e+08	2.02575e+08	2.95569e+08	3.64202e+08	2.30451e+08	7.55525e+07	2.37392e+08	2.76312e+08	3.40544e+08	3.8621e+08	2.15274e+08	3.07712e+08	1.08577e+08	1.97598e+08	2.45269e+08	2.91962e+08	3.83343e+08	3.36644e+08	5.00509e+08	1.80818e+08	2.4748e+08	2.91931e+08	2.91137e+08	2.63911e+08	1.59104e+09	3.19502e+08	2.39368e+08	2.35698e+08	2.33714e+08	3.04964e+08	2.3205e+08	1.29387
Q9R0P9	Ubiquitin carboxyl-terminal hydrolase isozyme L1 OS=Mus musculus OX=10090 GN=Uchl1 PE=1 SV=1 - [UCHL1_MOUSE]	98.65	2	17	27	1293	8.18097e+09	4.1942e+09	4073476569	5.31084e+09	3.94192e+09	7.56004e+09	7.26127e+09	5.10593e+09	5.88924e+09	3.60105e+09	6.7162e+09	7.79062e+09	4.6761e+09	7.35584e+09	6390431309	5.234e+09	5.25244e+09	5.09424e+09	6.27436e+09	7.44324e+09	5.35798e+09	5.67464e+09	4.64035e+09	4.76329e+09	6.144e+09	6147599362	6.82953e+09	6.09026e+09	7.30293e+09	6.59867e+09	4.73781e+09	5.93585e+09	7.00659e+09	7.28662e+09	6.1348e+09	8.88457e+09	6.7234e+09	6.94063e+09	5.14028e+09	5.88351e+09	6.58584e+09	5.85966e+09	1.28122
P05064	Fructose-bisphosphate aldolase A OS=Mus musculus OX=10090 GN=Aldoa PE=1 SV=2 - [ALDOA_MOUSE]	98.63	2	28	56	4799	1.78184e+10	1.04445e+10	10037768413	1.27814e+10	9.34575e+09	1.49723e+10	1.53532e+10	1.19482e+10	1.43108e+10	9.1105e+09	1.59109e+10	1.70292e+10	1.13339e+10	1.78596e+10	1.28874e+10	1.15708e+10	1.2446e+10	12084355398	1.59361e+10	1.67924e+10	1.23153e+10	1.30439e+10	1.13369e+10	1.25539e+10	1.3361e+10	1.34778e+10	1.84004e+10	1.40802e+10	1.60783e+10	1.40317e+10	1.16494e+10	1.45555e+10	1.62831e+10	15410167465	1.31016e+10	2.01916e+10	1.51837e+10	1.54826e+10	1.20856e+10	1.3139e+10	1.50042e+10	1.37659e+10	1.2415
P05063	Fructose-bisphosphate aldolase C OS=Mus musculus OX=10090 GN=Aldoc PE=1 SV=4 - [ALDOC_MOUSE]	98.62	2	26	61	2037	7.8021e+09	3.08564e+09	3.13827e+09	4.16187e+09	3.13716e+09	5.43194e+09	5876714525	3.6147e+09	4698346583	3.90512e+09	5.90487e+09	5.17982e+09	3799891162	5.89823e+09	5.50987e+09	4.243e+09	4.00558e+09	3.76223e+09	5.11546e+09	5712381989	4.21222e+09	3.62508e+09	3.72515e+09	4.28671e+09	5.6515e+09	4294257943	6132321370	4.6999e+09	6.03797e+09	4.40468e+09	3.96443e+09	4.74847e+09	6.89981e+09	4.58581e+09	4.86552e+09	6.03004e+09	5.57788e+09	5.3753e+09	4.26501e+09	4.70536e+09	5.25854e+09	4.56773e+09	1.23295
P21107	Tropomyosin alpha-3 chain OS=Mus musculus OX=10090 GN=Tpm3 PE=1 SV=3 - [TPM3_MOUSE]	98.6	1	7	69	1106	2.61735e+09	1.04059e+09	1.12005e+09	1.64272e+09	8.80249e+08	1.30298e+09	1.96859e+09	1.38429e+09	1757728704	9.5439e+08	1127819107	1.72536e+09	1.27252e+09	1.97438e+09	1237344246	6026572500	1.10141e+09	1.11484e+09	1.48343e+09	2.04956e+09	1.202e+09	1.25443e+09	1.19029e+09	1.36495e+09	1.02792e+09	1.53366e+09	2.40798e+09	1.60535e+09	1.93003e+09	1.87209e+09	1.33982e+09	1.26452e+09	1.58913e+09	1332621426	1.02744e+09	1.00708e+10	1.78364e+09	1.8269e+09	1.46019e+09	1.4736e+09	1.46748e+09	2.35516e+09	1.00499
Q01730	Ras suppressor protein 1 OS=Mus musculus OX=10090 GN=Rsu1 PE=1 SV=3 - [RSU1_MOUSE]	98.56	1	6	27	137	4.66303e+07	3.88417e+07	5.82073e+07	4.38324e+07	5.80361e+07	48678429	8.15823e+07	24618771	4.80589e+07	6.25829e+07	8.40798e+07	5.94024e+07	7.24749e+07	1.12057e+08	5.76922e+07	6.33784e+07	9.99728e+06	7.49827e+07	2.05405e+07	1.19543e+08	5.29079e+07	6.06142e+07	7.58435e+07	3.49522e+07	6.68734e+07	3.62871e+07	7.9887e+07	1.10184e+08	7.51599e+07	8.08011e+07	6.90338e+07	43566708	1.18826e+08	6.75556e+07	6.79553e+07	133092443	2.68751e+07	5.49958e+07	4.91096e+07	5.31043e+07	7.71412e+07	5.76885e+07	1.5708
Q9Z108	Double-stranded RNA-binding protein Staufen homolog 1 OS=Mus musculus OX=10090 GN=Stau1 PE=1 SV=1 - [STAU1_MOUSE]	98.56	1	2	61	246	551513504	1.43272e+08	2.43755e+08	3.01007e+08	7.21219e+08	5.8016e+08	418042224	1.02406e+08	1.2038e+08	1.50704e+08	2.44175e+08	3.41679e+08	1.19637e+09	1.62127e+08	1.40358e+09	1.75145e+08	8.92192e+08	1.30102e+08	2.46284e+07	1.88352e+08	2.40904e+08	9.03133e+07	7.8025e+08	2.20868e+08	4.84137e+08	652599576	3.64426e+07	2.4766e+07	916501003	1.85801e+08	2.62859e+08	4.11507e+08	411525007	1.94515e+08	6.28107e+08	3.6931e+08	4.46899e+07	3.44605e+08	3.92153e+08	2.74339e+08	6.69587e+08	2.82084e+08	1.70746
P63005	Platelet-activating factor acetylhydrolase IB subunit beta OS=Mus musculus OX=10090 GN=Pafah1b1 PE=1 SV=2 - [LIS1_MOUSE]	98.54	1	21	60	772	7.50241e+08	5.51055e+08	3.86203e+08	4.81208e+08	3.38622e+08	8.07497e+08	7.16739e+08	4.62238e+08	5.3508e+08	336379396	7.03793e+08	7.91366e+08	4.50097e+08	6.73338e+08	7.74088e+08	514676112	5.36107e+08	454539794	5.72119e+08	7.4379e+08	5.84142e+08	4.7172e+08	4.24143e+08	5.04381e+08	5.77195e+08	5.93171e+08	8.20615e+08	4.98165e+08	5.93404e+08	6.53965e+08	479599297	555198419	5.63971e+08	7.52558e+08	5.40791e+08	8.80848e+08	602176245	6.16945e+08	5.01466e+08	5.71587e+08	6.78536e+08	564246454	1.35311
Q05816	Fatty acid-binding protein 5 OS=Mus musculus OX=10090 GN=Fabp5 PE=1 SV=3 - [FABP5_MOUSE]	98.52	1	10	24	467	7.42984e+08	4.11919e+08	4.3509e+08	6.53798e+08	485346513	1003973100	972811537	6.76319e+08	7.4127e+08	3.74617e+08	6.10043e+08	1.05877e+09	6.22599e+08	9.05721e+08	4.72672e+08	5.44238e+08	6.48286e+08	578240742	7.36179e+08	8.19987e+08	5.15775e+08	7.10718e+08	5.86864e+08	5.04971e+08	7.91537e+08	8.07256e+08	1.02356e+09	7.19435e+08	9.07144e+08	7.80679e+08	4.04326e+08	7.07797e+08	7.98884e+08	952005460	7.44006e+08	1.21615e+09	8.37747e+08	8.26011e+08	5.45828e+08	7.53798e+08	7.3396e+08	6.65386e+08	1.34467
Q61166	Microtubule-associated protein RP/EB family member 1 OS=Mus musculus OX=10090 GN=Mapre1 PE=1 SV=3 - [MARE1_MOUSE]	98.51	1	15	36	520	5.15955e+08	2.04109e+08	4.18036e+08	3.44859e+08	3.17143e+08	3.50833e+08	5.89526e+08	4.51659e+08	499441064	4.00896e+08	4.53364e+08	2.68703e+08	3.55019e+08	4.26877e+08	5.10677e+08	382148016	2.14934e+08	4.08816e+08	3.98444e+08	6.29907e+08	466060576	3.4234e+08	3.63527e+08	2.5301e+08	561468312	222784472	3.54192e+08	5.98037e+08	7.94045e+08	4.41294e+08	4.03345e+08	507272853	9.68218e+08	3.19457e+08	379685352	2.90521e+08	5.68648e+08	2.84449e+08	3.6002e+08	4.58471e+08	4.02928e+08	4.0685e+08	1.11918
Q99J08	SEC14-like protein 2 OS=Mus musculus OX=10090 GN=Sec14l2 PE=1 SV=1 - [S14L2_MOUSE]	98.51	1	11	47	357	1.96918e+08	8.97851e+08	1.21441e+08	3.441e+08	1.09078e+08	2.50163e+08	3.88535e+08	2.45962e+08	7.64752e+07	2.09476e+08	3.78858e+08	3.18726e+08	2.66918e+08	1.69348e+08	3.60415e+08	3.3557e+08	7.22218e+07	1.11922e+08	334538154	4.13746e+08	3.66509e+08	2.0602e+08	1.09295e+08	9.36721e+07	4.16664e+08	1.11433e+09	286863210	1.57865e+08	3.52236e+08	1.14826e+09	3.14667e+08	4.45455e+08	1.5808e+08	1.82211e+08	748964711	3.02598e+08	7.47205e+07	2.15439e+08	3.33878e+08	2.34122e+08	2.98853e+08	2.536e+08	0.895097
P14152	Malate dehydrogenase, cytoplasmic OS=Mus musculus OX=10090 GN=Mdh1 PE=1 SV=3 - [MDHC_MOUSE]	98.5	1	22	47	1437	1.01797e+10	6.42422e+09	5.26133e+09	6.74983e+09	4979291608	8.39386e+09	8.94015e+09	7380976238	6.75085e+09	5086145082	8464375446	8.40572e+09	6055229283	9.01038e+09	6.59687e+09	7.26325e+09	7.08217e+09	6.38234e+09	7.7031e+09	8.94985e+09	4.90321e+09	6.7252e+09	6151178828	7.84297e+09	7.53904e+09	8.30538e+09	1.03453e+10	7.83271e+09	8.45574e+09	6.31057e+09	5.89473e+09	7541102266	7.93991e+09	1.00757e+10	8.13234e+09	1.17979e+10	8.70716e+09	9.09072e+09	6.71887e+09	7.3104e+09	7.70652e+09	7.47614e+09	1.147
Q8R0A5	Transcription elongation factor A protein-like 3 OS=Mus musculus OX=10090 GN=Tceal3 PE=1 SV=2 - [TCAL3_MOUSE]	98.5	1	4	42	640	8.22858e+08	2.15713e+08	3.44764e+08	3746469513	2.94824e+08	5.76802e+08	5.46358e+08	2.55973e+08	4.4398e+08	3.25348e+08	6.49722e+08	4.76994e+08	3.18591e+08	5.29339e+08	5.19531e+08	4.46152e+08	3.37589e+08	4.62274e+08	3.76315e+08	6.65628e+08	3.58293e+08	3.54691e+08	3.47032e+08	1.82227e+08	5.41646e+08	3.73441e+08	4.4337e+08	4.42111e+08	6.28797e+08	5.07767e+08	3.82104e+08	5.06527e+08	5.82273e+08	5.50888e+08	5.49231e+08	6.09684e+08	4.6486e+08	3.65976e+08	1.08493e+09	4.29692e+08	4.98836e+08	4.57592e+08	0.459788
Q8CCT4	Transcription elongation factor A protein-like 5 OS=Mus musculus OX=10090 GN=Tceal5 PE=1 SV=1 - [TCAL5_MOUSE]	98.5	1	7	40	667	604191480	2.01075e+08	3.30959e+08	3746469513	2.74635e+08	5.21529e+08	5.08032e+08	1.7643e+08	3.82844e+08	2.41216e+08	5.83966e+08	3.83339e+08	3.18591e+08	5.29339e+08	4.06672e+08	4.08248e+08	2.07778e+08	4.04107e+08	3.67909e+08	571617003	3.52141e+08	3.36657e+08	2.79138e+08	1.91632e+08	4.27008e+08	2.60072e+08	4.09421e+08	4.14114e+08	5.62091e+08	4.95747e+08	3.54373e+08	4.23073e+08	4.53764e+08	4.60828e+08	4.8196e+08	4.72337e+08	4.30672e+08	3.2673e+08	1.03147e+09	3.6601e+08	4.44381e+08	3.91932e+08	0.430825
Q64105	Sepiapterin reductase OS=Mus musculus OX=10090 GN=Spr PE=1 SV=1 - [SPRE_MOUSE]	98.47	1	11	30	452	2.62586e+08	1.9485e+08	1.79279e+08	2.96708e+08	2.10817e+08	2.72562e+08	251974647	211742342	1.94676e+08	1.38184e+08	3.20453e+08	3.40188e+08	1.67656e+08	2.45594e+08	2.10334e+08	1.98846e+08	2.08022e+08	1.73279e+08	2.1457e+08	3.45294e+08	1.73945e+08	1.88912e+08	1.53877e+08	2.26513e+08	2.18883e+08	2.40509e+08	300300656	1.99054e+08	4.13561e+08	2.27633e+08	1.57046e+08	3.06027e+08	2.29517e+08	3.19303e+08	225203903	4.10975e+08	2.76744e+08	2.32477e+08	2.28848e+08	2.13828e+08	2.56845e+08	2.28002e+08	1.12234
P10922	Histone H1.0 OS=Mus musculus OX=10090 GN=H1-0 PE=2 SV=4 - [H10_MOUSE]	98.45	1	5	43	341	4.81831e+08	3.10949e+08	4.23523e+08	3.48939e+08	2.30696e+08	4.05024e+08	463099039	3.42579e+08	3.13127e+08	2.97789e+08	1.75587e+09	4.34693e+08	291055404	4.37448e+08	2.56301e+08	4.5524e+08	3.72068e+08	4.32141e+08	4.67992e+08	5.61895e+08	2.41451e+08	1.46498e+08	3.8793e+08	2.4316e+08	3.65639e+08	4.30365e+08	4.2201e+08	3.62047e+08	4.78962e+08	4.8511e+08	2.29237e+08	2.82423e+08	2.96193e+08	5.35359e+08	4.407e+08	6.48705e+08	5.19387e+08	4.05483e+08	3.59188e+08	3.64324e+08	6.35073e+08	4.57867e+08	1.76808
Q9Z204	Heterogeneous nuclear ribonucleoproteins C1/C2 OS=Mus musculus OX=10090 GN=Hnrnpc PE=1 SV=1 - [HNRPC_MOUSE]	98.4	2	15	63	725	1.98572e+09	5.85892e+08	5.0336e+08	6.11721e+08	4.21926e+08	2.47569e+09	7.95526e+08	750609319	5.81065e+08	3.70038e+08	667416329	1.01095e+09	5.30363e+08	7.66473e+08	5.09102e+08	5.65688e+08	6.77921e+08	5.6781e+08	6.56905e+08	8.51636e+08	5.01017e+08	6.06875e+08	4.30042e+08	6.51506e+08	1457103884	7.35457e+08	9.92082e+08	5.897e+08	1.80095e+09	7.3302e+08	4.37694e+08	5.95362e+08	6.91621e+08	7.75967e+08	6.39689e+08	1.03291e+09	6.76689e+08	6.2991e+08	8.21723e+08	9.94586e+08	6.96861e+08	6.63992e+08	0.848049
P39053	Dynamin-1 OS=Mus musculus OX=10090 GN=Dnm1 PE=1 SV=2 - [DYN1_MOUSE]	98.39	1	55	145	4524	5.58815e+09	4.08826e+09	3229009423	4005298356	3.23136e+09	6.10854e+09	5.24758e+09	4.77903e+09	3.9228e+09	2.36397e+09	4779245718	6.23671e+09	3.89229e+09	5.0802e+09	4.20303e+09	4.29639e+09	4.00738e+09	3.72654e+09	4.70905e+09	5144456370	4.10146e+09	4.148e+09	3.50792e+09	4.48368e+09	4.44515e+09	4616135797	5862295517	4.76744e+09	4.9438e+09	4.53188e+09	3740930538	4.95476e+09	4.99536e+09	6.13186e+09	4.57059e+09	7.65602e+09	4.31595e+09	5006079036	4.02842e+09	4.48438e+09	4.83829e+09	4.37676e+09	1.20104
Q9DAK9	14 kDa phosphohistidine phosphatase OS=Mus musculus OX=10090 GN=Phpt1 PE=1 SV=1 - [PHP14_MOUSE]	98.39	1	5	16	143	150831241	213770565	8.13418e+07	6.08459e+07	3.98081e+07	111032288	5.48298e+08	2.16615e+08	1.32128e+08	4.57335e+07	5.30134e+08	5.25546e+07	7.54463e+07	1.06857e+08	3.75397e+08	6.94713e+07	1.09425e+08	6.66715e+07	8.87204e+07	9.9474e+07	5.90623e+07	5.8936e+07	8.49272e+07	3.97379e+07	7.98636e+07	2.81627e+08	5.20737e+07	7.06186e+07	8.62091e+07	7.59465e+07	3.74867e+08	6.01679e+07	5.23841e+07	4.35652e+07	78713105	6.24457e+07	8.50096e+07	4.01706e+08	1.0932e+08	2.10762e+08	2.28078e+08	8.67524e+07	2.08634
P61205	ADP-ribosylation factor 3 OS=Mus musculus OX=10090 GN=Arf3 PE=2 SV=2 - [ARF3_MOUSE]	98.34	4	4	31	1048	3.93808e+09	2.57756e+09	2.2109e+09	2.57224e+09	1.92159e+09	4.11296e+09	3.63224e+09	2.28361e+09	7.16466e+09	1.43921e+09	3.20033e+09	3.66638e+09	2.64348e+09	3.59216e+09	2.43589e+09	2.74427e+09	2.32198e+09	2.22538e+09	3.28051e+09	3.33895e+09	2.59285e+09	2.49851e+09	2.128e+09	2.92311e+09	2.7254e+09	2.93847e+09	4.17195e+09	2.93799e+09	8.37541e+09	3.23109e+09	1.98002e+09	2.19333e+09	2.59546e+09	3.15109e+09	2.81447e+09	4.08583e+09	3.52074e+09	7.94528e+09	2.64407e+09	3.72654e+09	3.10765e+09	2.78222e+09	1.17533
Q61990	Poly(rC)-binding protein 2 OS=Mus musculus OX=10090 GN=Pcbp2 PE=1 SV=1 - [PCBP2_MOUSE]	98.34	1	9	31	529	7.6541e+08	4.03694e+08	2.97418e+08	3.26287e+08	3.00909e+08	5.76871e+08	6.17829e+08	4.48981e+08	3.51151e+08	3.07281e+08	5.34128e+08	6.14001e+08	4.04237e+08	3.99401e+08	3.15362e+08	4.63317e+08	3.85854e+08	3.82533e+08	4.42137e+08	5.54853e+08	3.59737e+08	3.52667e+08	3.52434e+08	3.27845e+08	5.34497e+08	5.15789e+08	489870527	5.35958e+08	538475182	4.72006e+08	2.8968e+08	3.09157e+08	1.43919e+09	5.43105e+08	5.00371e+08	4.60873e+08	5.14527e+08	4.2364e+08	4.18744e+08	4.60423e+08	4.53426e+08	4.45739e+08	1.08282
P54923	[Protein ADP-ribosylarginine] hydrolase OS=Mus musculus OX=10090 GN=Adprh PE=1 SV=1 - [ADPRH_MOUSE]	98.34	1	9	39	228	1.00955e+08	7.34467e+07	1.7375e+08	1.0913e+08	1.02852e+08	3.42766e+08	1.55807e+08	8.00282e+07	2.17808e+08	65081618	1.16872e+08	4.12348e+08	1.44778e+08	1.54625e+08	1.63685e+08	9.4832e+07	2.26061e+08	6.17724e+07	152676620	1.3035e+08	2.86214e+08	1.0787e+08	1.06611e+08	2.81529e+08	1.10521e+08	7.6449e+07	1.2203e+08	6.91016e+07	1.4538e+08	1.1736e+08	1.01684e+08	5.48437e+07	7.60409e+07	133403718	1.86605e+08	2.86643e+08	130078819	8.37281e+07	1.12027e+08	1.72298e+08	1.98462e+08	1.33138e+08	1.77156
Q7TSJ2	Microtubule-associated protein 6 OS=Mus musculus OX=10090 GN=Map6 PE=1 SV=2 - [MAP6_MOUSE]	98.34	1	74	147	2755	1.40025e+09	8.2399e+08	1.0262e+09	1.48826e+09	9.68814e+08	2.27981e+09	3065165757	1.18102e+09	1.63415e+09	1.22449e+09	1.25468e+09	1.40794e+09	6.61651e+08	1.81835e+09	1.25096e+09	9.37937e+08	1.18933e+09	1.28315e+09	1.67884e+09	2.00894e+09	1.26379e+09	8.2223e+08	1140849620	1.5051e+09	2.07109e+09	1.52225e+09	1.20783e+10	1.5141e+09	1.86582e+09	1.65785e+09	1.24759e+09	1.32152e+09	1.60774e+09	1.47399e+09	1.72106e+09	2.12518e+09	2.13844e+09	2.02183e+09	1.1415e+09	1.87693e+09	1.27871e+09	1.41964e+09	1.1202
Q9CWU4	UPF0690 protein C1orf52 homolog OS=Mus musculus OX=10090 PE=1 SV=1 - [CA052_MOUSE]	98.33	1	1	22	87	2.59994e+07	0	1.00865e+08	0	5.3664e+07	2.60331e+07	4.67552e+07	2.02632e+08	0	6.88535e+07	5.44577e+07	1.05293e+08	1.28169e+08	3.38535e+08	4.80869e+07	2.03989e+07	7.46324e+06	2.48256e+07	135724044	119870376	4.18058e+07	1.53031e+07	98475875	95368996	178658537	3077241	8.21122e+07	6.85396e+07	164282698	72814165	2.69613e+08	7.44227e+07	2.92866e+08	43750874	92404829	1.64332e+07	1.00093e+08	1.66963e+08	3.61057e+07	6.88547e+07	1.34908e+08	6.16564e+07	3.73648
Q9D8Y0	EF-hand domain-containing protein D2 OS=Mus musculus OX=10090 GN=Efhd2 PE=1 SV=1 - [EFHD2_MOUSE]	98.33	2	18	35	856	2683819661	9.46141e+08	8.17603e+08	1.16462e+10	7.08104e+08	2.54061e+09	1.37148e+09	1.20539e+09	1829157226	1.29537e+09	1.19466e+09	1.62272e+09	1.06076e+10	1344992485	1.22247e+10	1.48118e+09	1.21642e+09	1.04169e+10	1.24948e+09	1.3181e+10	1.03575e+10	1059194075	9.89439e+09	1.32797e+09	1.15727e+09	1.17716e+10	1.83934e+10	1035327797	1.21437e+09	1.08491e+10	9.8359e+09	1.06251e+09	1.23552e+09	1214765392	1.08744e+09	1.92816e+10	1.3693e+09	1.64001e+09	3.36038e+09	1.6484e+09	5.39894e+09	5.509e+09	1.60665
Q9D6E4	Tetratricopeptide repeat protein 9B OS=Mus musculus OX=10090 GN=Ttc9b PE=1 SV=1 - [TTC9B_MOUSE]	98.33	1	3	28	101	7.37164e+07	4.84272e+07	1.89966e+07	42678680	5.70685e+07	9.80625e+07	55472079	5.82713e+07	4.58921e+07	2.46293e+07	193502992	96509080	2.66686e+07	6.69794e+07	9.56738e+07	2.6422e+07	3.09728e+07	3.17314e+07	55830807	8.95225e+07	0	5.84928e+07	3.01401e+07	6.83037e+07	2.79228e+07	4.97883e+07	9.3785e+07	4.07722e+07	1.02716e+08	51218512	2.51004e+07	1.19572e+08	9.79243e+07	84181332	3.56071e+07	1.96159e+08	29709975	2.66279e+07	4.81775e+07	5.64655e+07	9.58668e+07	4.68959e+07	1.98987
P60335	Poly(rC)-binding protein 1 OS=Mus musculus OX=10090 GN=Pcbp1 PE=1 SV=1 - [PCBP1_MOUSE]	98.31	1	12	33	588	7.48112e+08	3.91106e+08	2.94881e+08	3.8481e+08	3.00671e+08	5.57064e+08	6.14227e+08	470111347	3.86021e+08	3.3615e+08	4.95994e+08	6.46827e+08	3.71411e+08	5.07605e+08	5.64462e+08	4.00878e+08	4.42729e+08	3.43238e+08	4.63767e+08	5.70884e+08	3.54847e+08	3.41625e+08	3.73631e+08	4.01482e+08	5.33215e+08	5.00118e+08	6.12655e+08	4.80434e+08	5.69448e+08	4.8261e+08	3.31562e+08	3.80528e+08	5.28725e+08	5.45114e+08	4.82841e+08	8.39233e+08	4.8894e+08	4.92607e+08	4.23916e+08	4.72715e+08	5.1726e+08	4.44299e+08	1.22019
P62317	Small nuclear ribonucleoprotein Sm D2 OS=Mus musculus OX=10090 GN=Snrpd2 PE=1 SV=1 - [SMD2_MOUSE]	98.31	1	7	21	202	1.68063e+08	1.62369e+08	1.54876e+08	1.71902e+08	1.19981e+08	5.81566e+08	2.92694e+08	1.87502e+08	1.75287e+08	1.07458e+08	2.06274e+08	2.50103e+08	1.44265e+08	5.19429e+08	3.58104e+07	1.84605e+08	1.69102e+08	3.54771e+08	4.61398e+08	1.72333e+08	1.5e+08	1.58388e+08	1.68135e+08	1.54153e+08	1.82205e+08	2.03482e+08	1.8124e+08	2.17653e+08	3.80027e+08	1.06389e+08	1.28755e+08	1.42931e+08	1.57306e+08	2.12143e+08	8.40424e+07	2.84213e+08	1.74908e+08	2.02169e+08	1.55438e+08	2.68901e+08	2.31176e+08	2.68442e+08	1.48726
P40124	Adenylyl cyclase-associated protein 1 OS=Mus musculus OX=10090 GN=Cap1 PE=1 SV=4 - [CAP1_MOUSE]	98.31	1	21	60	1425	1.05109e+09	7.52533e+08	6.44283e+08	9.09763e+08	6.91613e+08	1.09044e+09	1.04391e+09	8.0126e+08	8.86042e+08	6.21559e+08	1.14032e+09	1.11388e+09	8.76854e+08	1160992954	9.35209e+08	9.48962e+08	7.16061e+08	8.18467e+08	1.04553e+09	1.39563e+09	8.28613e+08	9.05419e+08	8.26551e+08	7.68285e+08	1.07862e+09	9.22956e+08	1.14881e+09	1.35252e+09	1.34157e+09	1.02379e+09	7.949e+08	1.12302e+09	1.3042e+09	1.11044e+09	8.82017e+08	1.79175e+09	1.00157e+09	1.11037e+09	8.09857e+08	8.88643e+08	1.04545e+09	9.8493e+08	1.29091
P60521	Gamma-aminobutyric acid receptor-associated protein-like 2 OS=Mus musculus OX=10090 GN=Gabarapl2 PE=1 SV=1 - [GBRL2_MOUSE]	98.29	1	7	22	187	1.59414e+08	1.05114e+08	7.8779e+07	1.10572e+08	6.28607e+07	1.51866e+09	142580148	1.13059e+08	1.15842e+08	53562594	1.17637e+08	1.87446e+08	1.10336e+08	1.13448e+08	7.79537e+07	1.17442e+08	1.13732e+08	1.07719e+08	1.06967e+08	1.14157e+08	9.71391e+07	1.00181e+08	6.5443e+07	1.15274e+08	1.20197e+08	1.22977e+08	1.6775e+08	1.27123e+08	1.22656e+08	1.328e+08	9.76613e+07	1.34811e+08	1.23313e+08	148268330	106655415	2.29993e+08	1.49635e+08	1.47125e+08	1.03348e+08	3.8874e+08	1.21364e+08	1.12004e+08	1.17432
Q8JZS0	Protein lin-7 homolog A OS=Mus musculus OX=10090 GN=Lin7a PE=1 SV=2 - [LIN7A_MOUSE]	98.28	2	6	30	420	2.66085e+08	1.79995e+08	2.69753e+08	3.54895e+08	1.53366e+08	2.11173e+08	2.44113e+08	252989628	3.79525e+08	1.80348e+08	2.73826e+08	3.03626e+08	1.99587e+08	2.68899e+08	1.85003e+08	1.28174e+08	2.45276e+08	3.19304e+08	2.42186e+08	2.65561e+08	1.88055e+08	2.3019e+08	3.35115e+08	3.3752e+08	195388809	2.97869e+08	2.66328e+08	2.35965e+08	2.2198e+08	3.37078e+08	2.99305e+08	1.93021e+08	3.37035e+08	2.10284e+08	1.76501e+08	2.73371e+08	3.75503e+08	2.42941e+08	2.44819e+08	2.5363e+08	2.46188e+08	2.401e+08	1.00559
Q63810	Calcineurin subunit B type 1 OS=Mus musculus OX=10090 GN=Ppp3r1 PE=1 SV=3 - [CANB1_MOUSE]	98.24	2	14	29	788	2.13095e+09	1.09507e+09	1.26255e+09	2.05218e+09	1.37556e+09	2271692939	2.32217e+09	1.55201e+09	2.20398e+09	1.0262e+09	2080281351	1.94046e+09	2.06299e+09	2.50287e+09	1.4437e+09	1.68636e+09	1.403e+09	1.53798e+09	2101584950	2.16137e+09	1424181378	1.61128e+09	1.46217e+09	1.89619e+09	1.75894e+09	1.79895e+09	2.92184e+09	1.96763e+09	2.4814e+09	1.70629e+09	1.6433e+09	1.90607e+09	1586120795	2064317235	1.60617e+09	2.89594e+09	2406864586	2.70168e+09	1.58326e+09	1.87521e+09	2.00606e+09	1.77806e+09	1.26704
P06837	Neuromodulin OS=Mus musculus OX=10090 GN=Gap43 PE=1 SV=1 - [NEUM_MOUSE]	98.24	1	16	41	662	4.76534e+09	9.49886e+08	1544359741	2.5002e+09	1.69016e+09	2.55276e+09	3.39279e+09	1.28626e+09	2.45482e+09	1.37363e+09	2.87274e+09	1.7471e+09	2.21783e+09	3.07342e+09	2.74513e+09	2.54049e+09	1.41684e+09	2.05758e+09	2.53152e+09	3.14432e+09	1933822803	1.26561e+09	1.94082e+09	1.6144e+09	3.08002e+09	1.43068e+09	1.96565e+09	2.38249e+09	3.58386e+09	1.9975e+09	2.28272e+09	2.74958e+09	2.85518e+09	1.60319e+09	2.76576e+09	1.73086e+09	3.27437e+09	2.64392e+09	2.28999e+09	2.21205e+09	2.53124e+09	2.33815e+09	1.10535
P48758	Carbonyl reductase [NADPH] 1 OS=Mus musculus OX=10090 GN=Cbr1 PE=1 SV=3 - [CBR1_MOUSE]	98.19	1	16	47	625	7.48579e+08	4.52574e+08	4.49446e+08	5.10938e+08	3.22194e+08	7.02704e+08	6.33775e+08	5.48483e+08	5.14469e+08	3.88344e+08	597662457	6.90667e+08	431918039	683302387	5.76114e+08	4.55961e+08	5.47645e+08	4.59199e+08	5.90856e+08	6.42235e+08	4.70506e+08	5.05712e+08	4.28042e+08	4.59907e+08	529041576	5.20194e+08	7.00164e+08	5.23083e+08	6.33068e+08	5.63256e+08	425866735	5.29384e+08	6.13188e+08	7.05288e+08	4.94573e+08	778195374	5.15521e+08	6.55145e+08	4.96746e+08	5.57555e+08	5.95933e+08	5.39179e+08	1.19967
P45591	Cofilin-2 OS=Mus musculus OX=10090 GN=Cfl2 PE=1 SV=1 - [COF2_MOUSE]	98.19	1	9	25	726	6.19107e+09	4.32612e+09	3.56352e+09	4.2018e+09	2751815547	6.72581e+09	6.06565e+09	5.06602e+09	4.3601e+09	2.47489e+09	5295739053	7.13241e+09	3952487411	5.42548e+09	3.52379e+09	4.12136e+09	4.98767e+09	3.69219e+09	4.98283e+09	5.33912e+09	3.96243e+09	4.43839e+09	3.44074e+09	5.41577e+09	4.66283e+09	4.90824e+09	7.03131e+09	3924088459	5122802204	5021243956	3.66296e+09	4.02069e+09	4.24579e+09	6.42501e+09	4.44358e+09	7522440619	5.58481e+09	6.15913e+09	4.20687e+09	4.93849e+09	5.06598e+09	4.62463e+09	1.20422
Q3TEA8	Heterochromatin protein 1-binding protein 3 OS=Mus musculus OX=10090 GN=Hp1bp3 PE=1 SV=1 - [HP1B3_MOUSE]	98.19	1	14	99	669	2.13034e+08	756234382	8.23618e+08	3.14065e+08	7.08403e+08	212042782	1.21264e+09	7.33389e+08	4.7715e+08	6.8162e+08	2.61361e+08	1.21303e+09	1.54449e+09	1.13101e+09	9.91542e+08	4.792e+08	794942114	9.73799e+08	1.04002e+09	4.4174e+09	4.80476e+08	1.09834e+09	9.14634e+08	6.91113e+08	6.16064e+08	3.38146e+08	2.07047e+09	9.98209e+08	1.49143e+09	1.22879e+09	4.37853e+08	1.01246e+09	1.08639e+09	1140122554	1444726115	1.43121e+09	9.79264e+08	1.41614e+09	5.63071e+08	6.63369e+08	1.02829e+09	1.54107e+09	1.82621
Q9WV34	MAGUK p55 subfamily member 2 OS=Mus musculus OX=10090 GN=Mpp2 PE=1 SV=1 - [MPP2_MOUSE]	98.19	1	22	71	490	2.92215e+08	2.25072e+08	2.49752e+08	2.37598e+08	1.66021e+08	1.20509e+08	2.90303e+08	113066842	2.25314e+08	1.15521e+08	4.00332e+08	209484127	2.4489e+08	3.20199e+08	1.96717e+08	1.46653e+08	1.15503e+08	2.1982e+08	1.28723e+08	5.5682e+08	1.53654e+08	142216832	1.55099e+08	2.08131e+08	2.46333e+08	1.27569e+08	2.5244e+08	2.30683e+08	2.55329e+08	234071759	1.64491e+08	1.70408e+08	4.06638e+08	2.14609e+08	1.76124e+08	3.0552e+08	4.06193e+08	1.97661e+08	2.34132e+08	1.72943e+08	2.74324e+08	2.33504e+08	1.17167
Q9D1C8	Vacuolar protein sorting-associated protein 28 homolog OS=Mus musculus OX=10090 GN=Vps28 PE=1 SV=1 - [VPS28_MOUSE]	98.19	1	6	32	176	126365734	4.90203e+07	4.60226e+07	68952309	4.43575e+07	9.96483e+07	1.20744e+08	7.20293e+07	5.77425e+07	1.7339e+07	99519263	1.54556e+08	7.9102e+07	5.51427e+07	2.79188e+07	4.35833e+07	9.08068e+07	1.41455e+08	40871584	119763959	3.16767e+07	6.21481e+07	6.20144e+07	3.79909e+07	9.2307e+07	3.89449e+07	8.36043e+07	3.41824e+07	4.35998e+07	8.39231e+07	1.14049e+08	6.5392e+07	6.62648e+07	5.85353e+07	3.21295e+07	7.30664e+07	8.47162e+07	4.70297e+07	6.69437e+07	7.35006e+07	8.32477e+07	8.72962e+07	1.24355
P10518	Delta-aminolevulinic acid dehydratase OS=Mus musculus OX=10090 GN=Alad PE=1 SV=1 - [HEM2_MOUSE]	98.18	1	13	35	284	8.94383e+07	6.31333e+07	9.36767e+07	1.16558e+08	8.60556e+07	1.13039e+08	1.49336e+09	8.86826e+08	1.3961e+08	8.03457e+08	1.38161e+09	1.13057e+09	1.92248e+09	2.64756e+09	1.05919e+08	9.78678e+08	622025938	1.04572e+08	2.58941e+09	2.89432e+09	1.5739e+09	4.58457e+07	1.03195e+09	1.06543e+08	2.47624e+08	7.75165e+07	1.52465e+08	1.8004e+09	2.07913e+09	1.15305e+09	8.2906e+08	9.80632e+07	1406780336	9.75878e+07	5.42429e+08	1.74476e+08	1.2764e+08	1.59892e+08	8.97723e+07	6.87259e+08	1.43763e+09	1.4378e+09	16.0141
P35979	60S ribosomal protein L12 OS=Mus musculus OX=10090 GN=Rpl12 PE=1 SV=2 - [RL12_MOUSE]	98.18	3	8	27	282	263324727	2.00924e+08	1.85428e+08	2.26746e+08	1.46565e+08	2.66061e+08	2.7083e+08	1.84442e+08	1.85003e+08	1.11106e+08	1.82889e+08	2.89117e+08	1.85029e+08	2.22396e+08	2.14351e+08	1.70741e+08	2.13922e+08	1.93024e+08	2.29558e+08	2.47339e+08	1.56667e+08	1.95652e+08	1.82841e+08	177475793	2.1475e+08	2.33572e+08	2.64963e+08	1.9056e+08	2.17497e+08	2.28046e+08	1.61065e+08	1.98672e+08	1.85258e+08	3.47417e+08	2.29246e+08	3.13487e+08	2.18866e+08	2.29692e+08	2.04598e+08	2.03488e+08	2.18756e+08	2.10917e+08	1.0692
P83870	PHD finger-like domain-containing protein 5A OS=Mus musculus OX=10090 GN=Phf5a PE=1 SV=1 - [PHF5A_MOUSE]	98.18	1	1	14	22	0	1.73423e+06	765658	947642	1.54748e+07	0	4.17829e+06	9.73041e+06	4.45419e+06	8.53783e+07	674400992	0	0	2.30019e+06	0	2.4174e+06	0	0	4.00265e+06	4.56786e+06	0	0	0	0	0	0	0	2.60107e+06	7.76308e+07	0	0	0	0	2.10457e+06	1.94215e+06	6.55336e+06	0	1.21439e+06	3.78446e+06	2.07482e+07	1.3534e+08	2.19758e+06	35.7621
P24369	Peptidyl-prolyl cis-trans isomerase B OS=Mus musculus OX=10090 GN=Ppib PE=1 SV=2 - [PPIB_MOUSE]	98.15	1	11	39	355	3.0203e+09	8.24233e+08	1.10515e+09	1.37646e+09	1044671967	1.9278e+09	2336355671	9.83447e+08	1.66543e+09	1.5205e+09	2.16197e+09	1.46659e+09	1.37401e+09	1.96788e+09	1450505003	1689453083	1.21039e+09	1.40152e+09	1.65309e+09	2.90868e+09	1321166341	9.53971e+08	1.3834e+09	1.26798e+09	2065027695	1.16633e+09	1.98519e+10	1.59537e+09	2259337243	1.5652e+10	1.3771e+09	1.86326e+10	1.87281e+10	19671108102	1.88436e+09	1471602612	2227407470	2.73717e+09	1.47416e+09	1.6867e+09	1.68419e+09	1.77263e+09	1.14247
O88456	Calpain small subunit 1 OS=Mus musculus OX=10090 GN=Capns1 PE=1 SV=1 - [CPNS1_MOUSE]	98.14	2	11	29	284	1.16299e+08	1.16549e+08	1.02254e+08	1.19033e+08	8.53234e+07	1.35547e+08	1.40968e+08	8.05228e+07	1.5234e+08	7.31404e+07	1.26107e+08	1.50427e+08	1.13991e+08	1.31935e+08	1.40921e+08	1.19705e+08	8.24995e+07	9.30456e+07	1.54341e+08	1.56817e+08	5.98118e+07	7.76977e+07	1.11132e+08	1.033e+08	8.36041e+07	1.2738e+08	1.62677e+08	1.48929e+08	152168674	1.28348e+08	9.18607e+07	1.47452e+08	1.66903e+08	1.80359e+08	1.30339e+08	2.32163e+08	1.10026e+08	1.32098e+08	1.07892e+08	1.16504e+08	1.32676e+08	1.21282e+08	1.22972
Q9D7G0	Ribose-phosphate pyrophosphokinase 1 OS=Mus musculus OX=10090 GN=Prps1 PE=1 SV=4 - [PRPS1_MOUSE]	98.11	1	7	41	584	5.39577e+08	1.92343e+08	2.88775e+08	3.38103e+08	2.63648e+08	4.60203e+08	4.44631e+08	2.58737e+08	3.55953e+08	2.33141e+08	4.90343e+08	3.82591e+08	2.97921e+08	4.9233e+08	3.65829e+08	3.64599e+08	2.40777e+08	2.88572e+08	4.05566e+08	3.58689e+08	3.55172e+08	3.05918e+08	3.20871e+08	2.37009e+08	396028484	2.85827e+08	3.80378e+08	404721965	4.48628e+08	3.86558e+08	3.23976e+08	339494929	4.28495e+08	4.16673e+08	2.77327e+08	511491277	3.57382e+08	2.94214e+08	3.24489e+08	3.50533e+08	4.05803e+08	3.3164e+08	1.25059
O35143	ATPase inhibitor, mitochondrial OS=Mus musculus OX=10090 GN=Atp5if1 PE=1 SV=2 - [ATIF1_MOUSE]	98.11	1	2	19	107	1.77386e+08	4.69851e+06	1.33879e+07	8.14594e+07	5.32723e+07	1.14463e+08	9.66521e+07	3.21029e+07	6.48461e+07	6.17311e+07	4.14303e+07	39955899	5.76508e+07	7.29032e+07	6.00666e+07	0	44164678	7.02821e+07	9.03908e+07	1.2093e+08	1.57356e+07	1.32018e+07	2.44578e+07	1.12537e+08	6.29862e+07	1.22966e+07	1.33075e+08	8.90417e+07	1.01444e+08	0	39174077	4.81847e+07	7.8723e+07	2.20188e+07	8.01952e+07	6.72487e+07	1.63421e+08	4.78918e+07	6.60408e+07	7.3959e+07	5.44014e+07	6.51534e+07	0.823754
P08553	Neurofilament medium polypeptide OS=Mus musculus OX=10090 GN=Nefm PE=1 SV=4 - [NFM_MOUSE]	98.11	1	34	135	1123	2.56694e+09	1.48228e+08	3.45987e+08	499617615	4.13063e+08	2.95183e+08	6.38402e+08	4.17536e+08	445583829	3.04683e+08	3.05303e+08	6.44307e+08	4.88617e+08	4.59916e+08	521519856	2.22014e+08	4.98452e+08	6.08613e+09	3.10842e+08	7.82699e+08	3.55068e+08	6.35198e+08	3.09786e+08	6.02619e+08	3.88841e+08	5.43808e+08	1.06349e+09	5.00563e+08	1.89779e+08	4.28515e+08	5.79937e+08	1.51921e+09	1.371e+10	1135074324	456904098	988076484	3.94353e+08	4.28147e+08	7.94767e+08	4.20278e+08	4.83932e+08	1.58003e+09	0.608898
Q923D2	Flavin reductase (NADPH) OS=Mus musculus OX=10090 GN=Blvrb PE=1 SV=3 - [BLVRB_MOUSE]	98.06	1	9	22	209	2.33851e+08	4.57549e+08	1.03756e+08	1.17545e+08	8.99292e+07	1.88066e+08	1.64426e+08	1.14581e+08	1.58349e+08	1.00361e+08	1.54372e+08	147348600	1.14305e+08	2.09308e+08	1.4054e+08	1.41344e+08	1.24659e+08	1.61179e+08	2.39861e+08	1.94141e+08	1.30191e+08	128030637	1.09718e+08	9.76594e+07	1.32317e+08	8.89144e+07	1.27497e+08	1.55186e+08	1.66338e+08	1.60055e+08	1.15858e+08	1.51945e+08	1.63903e+08	1.48724e+08	1.41584e+08	1.71189e+08	1.66456e+08	2.07288e+08	2.00526e+08	1.45156e+08	1.53175e+08	1.72237e+08	0.763865
Q9CYG7	Mitochondrial import receptor subunit TOM34 OS=Mus musculus OX=10090 GN=Tomm34 PE=1 SV=1 - [TOM34_MOUSE]	98.06	1	8	43	304	1.61596e+09	5.70693e+07	3.18086e+07	5.81861e+07	6.96418e+07	7.52585e+07	2.09086e+08	1.26184e+08	7.22358e+08	2.8215e+07	6.1353e+07	631081417	6.35922e+08	8.40221e+08	6.25082e+07	8.48476e+07	8.66425e+07	6.07668e+08	1.08158e+08	6.87623e+07	3.72865e+07	4.48642e+08	7.02992e+07	6.54853e+08	1.17045e+09	6.13891e+08	7.32942e+08	4.05492e+07	1.12308e+09	6.95168e+08	1.25592e+07	7.0918e+08	7.5249e+08	717134243	9.49319e+08	2.11803e+08	1.1503e+08	1.40989e+08	3.66533e+08	2.3222e+08	4.46217e+08	1.91216e+08	1.2174
Q9R111	Guanine deaminase OS=Mus musculus OX=10090 GN=Gda PE=1 SV=1 - [GUAD_MOUSE]	98.02	1	34	52	1433	1.79478e+09	1.19462e+09	9.44381e+08	1.12081e+09	8.34953e+08	1.72231e+09	1.51134e+09	1.3507e+09	1.27918e+09	943504450	1.50495e+09	4266949974	1050596318	1.57368e+09	1.16211e+09	1.06802e+09	1.25046e+09	1.1593e+09	1.26627e+09	1.59995e+09	1.18171e+09	1.34147e+09	1.08338e+09	1.2615e+09	1.27747e+09	1.40132e+09	1.85137e+09	1.43837e+09	1.59762e+09	1.36708e+09	1.10731e+09	1.35313e+09	1.44331e+09	1.70468e+09	1.30227e+09	2.04429e+09	1.55388e+09	1615083690	1.17791e+09	1.36141e+09	1.91166e+09	1.2688e+09	1.62292
Q9CZY3	Ubiquitin-conjugating enzyme E2 variant 1 OS=Mus musculus OX=10090 GN=Ube2v1 PE=1 SV=1 - [UB2V1_MOUSE]	97.96	1	2	21	343	1.74742e+09	9.86329e+08	3.09148e+09	2.01429e+09	7.79891e+08	3.37515e+09	3.31512e+09	2650606723	7.69421e+09	7.59487e+08	2.49581e+09	4.68224e+09	3.74455e+09	5.81562e+09	4.63816e+09	4177843770	2.91019e+09	9.88403e+08	6.18516e+09	2.75471e+09	1.55833e+09	4.61388e+09	3.46223e+09	3.55559e+09	5.17097e+09	3989173069	7.64033e+09	3.73144e+09	4.12539e+09	5.00271e+09	3.21968e+09	8.76186e+08	4.89615e+09	2.9414e+09	3321141358	6.45268e+09	4.45938e+09	3.50119e+09	1.72388e+09	3.55892e+09	4.27527e+09	3.40326e+09	2.48003
Q9CXY6	Interleukin enhancer-binding factor 2 OS=Mus musculus OX=10090 GN=Ilf2 PE=1 SV=1 - [ILF2_MOUSE]	97.95	1	14	39	404	3.00062e+08	194583045	1.99781e+08	275908807	1.45725e+08	3.39998e+08	3.0064e+08	1.27383e+08	2.56953e+08	2.95587e+08	2.45832e+08	2.79379e+08	1.85487e+08	2.70682e+08	2.40909e+08	1.72615e+08	1.75582e+08	2.53004e+08	2.23218e+08	2.53539e+08	1.76917e+08	2.06568e+08	5.63023e+08	1.74193e+08	1.48619e+08	3.02039e+08	6.63093e+08	2.0691e+08	3.26744e+08	2.71113e+08	1.51069e+08	1.87137e+08	2.10628e+08	2.96287e+08	1.77823e+08	3.39547e+08	1.96715e+08	2.50642e+08	2.23212e+08	2.64112e+08	2.44458e+08	2.15591e+08	1.09518
Q9WV02	RNA-binding motif protein, X chromosome OS=Mus musculus OX=10090 GN=Rbmx PE=1 SV=1 - [RBMX_MOUSE]	97.95	1	3	83	792	628376739	3.87933e+08	3.34069e+08	4.57884e+08	7.78197e+08	574637848	8.39854e+08	3.61066e+08	3.06199e+08	2.22621e+08	4.30714e+08	6.12536e+08	6.03604e+08	3.96575e+08	1.04097e+09	4.2282e+08	3.98264e+08	3.82468e+08	3.88638e+08	621253795	3.47779e+08	3.89619e+08	4.33954e+08	3.79556e+08	3.74599e+08	4.92549e+08	1.02763e+09	4.14769e+08	4.45507e+08	6.99101e+08	2.4429e+08	3.08861e+08	5.2453e+08	9.88627e+08	5.79669e+08	6.68091e+08	4.29858e+08	477560279	5.17292e+08	4.60876e+08	6.16881e+08	4.42689e+08	1.19252
P17183	Gamma-enolase OS=Mus musculus OX=10090 GN=Eno2 PE=1 SV=2 - [ENOG_MOUSE]	97.93	2	24	55	6176	1.33664e+10	1.2067e+10	9836125929	1.06676e+10	7.78953e+09	1.59287e+10	1.4499e+10	1.37786e+10	1.13537e+10	6.9359e+09	1.2511e+10	1.89981e+10	1.06601e+10	1.45373e+10	1.09008e+10	1.03468e+10	1.31064e+10	9.92438e+09	1.30458e+10	1.47353e+10	1.02481e+10	1.1559e+10	9.66433e+09	1.29426e+10	1.08695e+10	1.42995e+10	1.78028e+10	1.09996e+10	1.43471e+10	1.29976e+10	9291808150	1.1289e+10	12997270281	1.83245e+10	1.15419e+10	2.05356e+10	1.29807e+10	1.48227e+10	1.07453e+10	1.24992e+10	1.35215e+10	1.22317e+10	1.25836
P09541	Myosin light chain 4 OS=Mus musculus OX=10090 GN=Myl4 PE=1 SV=3 - [MYL4_MOUSE]	97.93	2	6	26	147	7.62024e+07	7.319e+07	51418590	7.01933e+07	6.43853e+07	7.96041e+07	7.98719e+07	3.63538e+07	7.70021e+07	4.74331e+07	5.76095e+07	4.09117e+07	5.06447e+07	9.84066e+07	1.84241e+08	5.54914e+07	8.75589e+07	4.24002e+07	7.76474e+07	1.9585e+08	9.09066e+07	4.71072e+07	9.05172e+07	6.90834e+07	1.56289e+08	4.49908e+07	53537302	8.65581e+07	6.45182e+07	4.27543e+07	8.86384e+07	5.63822e+07	1.009e+08	3.53124e+07	6.6794e+07	5.64866e+07	7.92008e+07	7.52981e+07	6.70779e+07	6.4053e+07	8.63627e+07	9.17895e+07	1.2875
P26443	Glutamate dehydrogenase 1, mitochondrial OS=Mus musculus OX=10090 GN=Glud1 PE=1 SV=1 - [DHE3_MOUSE]	97.85	2	32	78	1364	1618381935	7.93273e+08	854974473	1.03053e+09	6.70672e+08	1.53857e+09	1.26777e+09	1.11789e+09	9.64275e+08	7.04837e+08	1.14545e+09	1.35122e+09	7.21795e+08	1.03829e+09	8.82739e+08	9.63867e+08	8.02447e+08	8.60754e+08	1.00572e+09	1.5049e+09	865090583	7.71797e+08	7.28385e+08	9.63933e+08	1.02193e+09	7.43516e+08	1.2178e+09	1.03988e+09	1.0214e+09	1.00626e+09	1.03624e+09	1.18007e+09	1.06333e+09	1.23576e+09	9.99508e+08	1.53214e+09	1.25481e+09	9.67715e+08	9.93566e+08	1.11867e+09	1.0279e+09	1.02754e+09	1.03456
P54775	26S proteasome regulatory subunit 6B OS=Mus musculus OX=10090 GN=Psmc4 PE=1 SV=2 - [PRS6B_MOUSE]	97.85	1	28	53	810	5.51461e+08	2.0058e+08	2.40192e+08	2.6765e+08	1.50576e+08	2.40052e+08	4.86e+08	2.28426e+08	2.03373e+08	1.33372e+08	2.25942e+08	3.26663e+08	2.73373e+08	3.24232e+08	2.0889e+08	3.15941e+08	2.09861e+08	2.11565e+08	3.70139e+08	3.01827e+08	2.35777e+08	1.82014e+08	2.38491e+08	1.83822e+08	3.98825e+08	2.9285e+08	3.44705e+08	2.95912e+08	4.74674e+08	189178008	163941565	2.44062e+08	2.62886e+08	3.06576e+08	3.37734e+08	3.99886e+08	2.115e+08	319832218	2.82092e+08	2.58245e+08	2.7182e+08	2.81867e+08	0.963587
P48036	Annexin A5 OS=Mus musculus OX=10090 GN=Anxa5 PE=1 SV=1 - [ANXA5_MOUSE]	97.81	1	25	50	784	1.2292e+09	6.00806e+08	4.9743e+08	3.11909e+09	3.81015e+08	7.68993e+08	1.30741e+09	6.48202e+08	5.61781e+08	3.47653e+08	9.78311e+08	8.41768e+08	4.77294e+08	6.31047e+08	1.49022e+09	5.28492e+08	5.28356e+08	5.06756e+08	625082654	6.74193e+08	4.61741e+08	5.01375e+08	663461771	6.14115e+08	5.63151e+08	6.41693e+08	2.58993e+09	4.97963e+08	6.70278e+08	6.00108e+08	6.8006e+08	5.2725e+08	5.3912e+08	8.43976e+08	6.19821e+08	3.66638e+09	553231109	6.89591e+08	1.16551e+09	7.26807e+08	8.83727e+08	5.72576e+08	0.758234
Q60864	Stress-induced-phosphoprotein 1 OS=Mus musculus OX=10090 GN=Stip1 PE=1 SV=1 - [STIP1_MOUSE]	97.79	1	45	117	1803	2.03124e+09	2.55679e+09	3.91378e+09	2.73889e+09	6.51971e+08	6.09442e+09	6.60878e+09	2.70783e+09	1.10075e+10	2.1276e+09	4.86825e+09	2.26182e+09	5.36051e+09	7748342121	5.49513e+09	4.04588e+09	3.21389e+09	1977969756	7.13309e+09	2.53892e+09	4.99668e+09	3.71215e+09	2.7068e+09	4.23241e+09	5.88214e+09	2.1712e+09	4.29428e+09	2462448791	3.76179e+09	4.5492e+09	2.24412e+09	3.53187e+09	4.72562e+09	3.30563e+09	2.27589e+09	4.96674e+09	7.03519e+09	5.2249e+09	2.37853e+09	5.70922e+09	5.14681e+09	3.78195e+09	2.16386
Q9CQ79	Thioredoxin domain-containing protein 9 OS=Mus musculus OX=10090 GN=Txndc9 PE=1 SV=1 - [TXND9_MOUSE]	97.79	1	2	30	115	64771508	8.88152e+07	1.66296e+07	178447309	6.69943e+07	2.42982e+07	2.66517e+07	100929754	8.7349e+07	8.00746e+07	47860120	7.17675e+07	2.51146e+07	2.16193e+08	2.86965e+07	195611120	179740857	1.78548e+08	5.10909e+07	9.11593e+07	169594642	2.21946e+07	3.18541e+07	5.83652e+07	4.41462e+07	1.5152e+08	79270471	3.80154e+07	205440134	7.04031e+07	9.69264e+07	46182453	41877321	1.25304e+08	2.7978e+07	5.87606e+07	4.53501e+07	1.12569e+08	8.31316e+07	6.38607e+07	7.79264e+07	1.3923e+08	0.937386
P84084	ADP-ribosylation factor 5 OS=Mus musculus OX=10090 GN=Arf5 PE=1 SV=2 - [ARF5_MOUSE]	97.78	3	6	26	673	2876140446	2105237121	1.69626e+09	1.96537e+09	1.4955e+09	3.10765e+09	2.61613e+09	1.79522e+09	2.12754e+09	1.00019e+09	2.16929e+09	2.89447e+09	2.03386e+09	2.48369e+09	1.74988e+09	2.16143e+09	1.71337e+09	1.64792e+09	2.2904e+09	2.22601e+09	1922862011	1.99653e+09	1.57895e+09	2.18441e+09	1.82768e+09	2.3272e+09	3.19384e+09	2.21549e+09	2.39912e+09	2.42979e+09	1.41825e+09	1.45463e+09	1.82162e+09	1.8538e+09	2.05308e+09	3257222171	2.29116e+09	2.50458e+09	2.0277e+09	2.12934e+09	2.26624e+09	2.00783e+09	1.11764
Q99LS3	Phosphoserine phosphatase OS=Mus musculus OX=10090 GN=Psph PE=1 SV=1 - [SERB_MOUSE]	97.78	1	3	34	176	5.5753e+07	6.76428e+07	0	2.67294e+07	5.58528e+07	1.36066e+07	9.50769e+07	4.82254e+07	4.18226e+07	9.67105e+07	2.66463e+07	8.63263e+07	4.10246e+07	7.18263e+07	3.9117e+07	7.10236e+07	2.55619e+07	1.00669e+08	7.09965e+07	9.9866e+07	2.84328e+07	6.21438e+07	46712129	2.50375e+08	9.86156e+07	1.67585e+08	3.44854e+07	4.954e+07	6.36205e+07	2.82894e+07	9.13555e+07	62219819	410450388	1.28591e+08	57887169	4.04636e+08	5.82603e+07	238135849	4.11956e+07	5.90884e+07	5.29881e+07	7.36234e+07	1.28626
P63168	Dynein light chain 1, cytoplasmic OS=Mus musculus OX=10090 GN=Dynll1 PE=1 SV=1 - [DYL1_MOUSE]	97.75	1	3	16	225	6.95978e+08	2.59534e+08	3.01171e+08	375514138	2.63889e+08	4.15653e+08	5.3155e+08	3.79242e+08	4.71503e+08	3.28801e+08	5.58946e+08	4.58317e+08	3.70006e+08	546066864	338252161	2.76876e+08	2.83746e+08	3.16139e+08	4.33271e+08	4.25974e+08	3.16196e+08	2.86288e+08	3.11114e+08	3.13345e+08	4.95242e+08	2.24262e+08	4.5683e+08	4.37115e+08	4.99251e+08	3.29253e+08	2.76147e+08	4.26598e+08	5.53634e+08	1.82928e+08	2.55589e+08	5.67266e+08	4.60175e+08	4.3789e+08	3.79217e+08	4.2535e+08	4.54318e+08	3.47201e+08	1.19804
Q9D0M5	Dynein light chain 2, cytoplasmic OS=Mus musculus OX=10090 GN=Dynll2 PE=1 SV=1 - [DYL2_MOUSE]	97.75	1	3	16	353	1.49808e+09	5.77718e+08	7.52466e+08	9.27913e+08	6.74029e+08	1.11012e+09	1.09413e+09	7.18765e+08	1.06189e+09	6.60584e+08	1.19365e+09	1.12526e+09	8.57536e+08	1.15063e+09	8.01656e+08	9.55291e+08	7.62879e+08	8.19423e+08	8.62871e+08	1018096105	8.38108e+08	8.13315e+08	748291875	7.85434e+08	9.91747e+08	745214234	1.13311e+09	9.35638e+08	9.72425e+08	9.81018e+08	8.1962e+08	1.01423e+09	1.04926e+09	8.18924e+08	9.19054e+08	1.16657e+09	1.09777e+09	9.75815e+08	8.86042e+08	9.29097e+08	1.02575e+09	8.83712e+08	1.15767
Q9D0M1	Phosphoribosyl pyrophosphate synthase-associated protein 1 OS=Mus musculus OX=10090 GN=Prpsap1 PE=1 SV=1 - [KPRA_MOUSE]	97.75	1	6	40	217	7.92791e+07	7.22136e+07	3.14835e+07	124149374	2.42985e+07	1.05477e+08	1.10733e+08	7.71973e+07	7.87098e+06	2.71519e+07	8.26668e+07	1.05733e+08	9.57794e+07	1.37471e+08	154825498	4.59851e+07	5.17651e+07	35522455	9.85568e+07	1.2112e+08	4.26485e+07	7.78019e+07	4.5834e+07	3.28152e+08	6.5103e+07	7.0708e+07	1.0458e+08	6.75262e+07	1.68013e+08	28561262	6.87962e+07	7.64448e+07	1.44722e+08	1.25697e+08	4.50673e+07	1.58803e+08	2.41187e+07	4.08428e+08	6.62848e+07	6.56862e+07	1.15295e+08	7.059e+07	1.73939
P52480	Pyruvate kinase PKM OS=Mus musculus OX=10090 GN=Pkm PE=1 SV=4 - [KPYM_MOUSE]	97.74	2	35	79	4505	1.87654e+10	14095126567	1.23862e+10	1.57486e+10	1.04167e+10	2.03381e+10	1.91679e+10	1.85486e+10	16316110100	9.60121e+09	1.56155e+10	2.41314e+10	1.4226e+10	2.01927e+10	9097653639	1.47554e+10	1.6984e+10	1.44331e+10	1.69055e+10	18181135019	13541101330	1.6026e+10	1.27937e+10	1.69304e+10	1.4797e+10	1.84412e+10	25354043064	1.51648e+10	1.83709e+10	16269422910	1.34715e+10	1.61362e+10	1.88185e+10	2.39401e+10	1.64704e+10	29581288236	1.86011e+10	2.14685e+10	14282420967	1.67944e+10	1.66526e+10	1.62518e+10	1.16595
O88685	26S proteasome regulatory subunit 6A OS=Mus musculus OX=10090 GN=Psmc3 PE=1 SV=2 - [PRS6A_MOUSE]	97.74	1	23	73	839	2.8769e+08	251433147	2.33503e+08	2.29833e+08	1.6492e+08	3.87344e+08	766051315	1842880018	2.1228e+08	1.48563e+08	2.63387e+08	3.98844e+08	2.11335e+08	3.00346e+08	1.99905e+08	2.76827e+08	3.03817e+08	1.91962e+08	2.68832e+08	3.69274e+08	2.15271e+08	2.82777e+08	2.42774e+08	2.50117e+08	2.89709e+08	2.96183e+08	8.33561e+08	258198910	2.93395e+08	263523838	2.04251e+08	2.3935e+08	3.02991e+08	4.06291e+08	2.32139e+08	4.4085e+08	3.1503e+08	3.5618e+08	2.33476e+08	6.71424e+08	2.74764e+08	2.82142e+08	1.17684
Q9D6T0	Nitric oxide synthase-interacting protein OS=Mus musculus OX=10090 GN=Nosip PE=1 SV=1 - [NOSIP_MOUSE]	97.67	1	1	29	71	1.151e+08	1.64392e+08	1.05532e+07	1.77955e+07	43357943	9.16627e+07	0	6.17262e+06	7.91923e+07	9.76597e+06	85238273	1.02835e+08	6.52655e+07	1.50658e+07	5.75648e+07	2.78265e+07	5.57192e+07	1.15783e+07	1.33e+07	49191775	42197767	1.55578e+07	3.05091e+07	3.10349e+07	2.80215e+07	2.55568e+07	1.69694e+08	2.48649e+07	1.04152e+08	2.7741e+07	4.80457e+07	1.56401e+08	5.46515e+07	6.24365e+07	4.44288e+07	2.61812e+08	1.84151e+07	4.24232e+07	7.02397e+07	3.73587e+07	6.51938e+07	3.15232e+07	0.928162
P10711	Transcription elongation factor A protein 1 OS=Mus musculus OX=10090 GN=Tcea1 PE=1 SV=2 - [TCEA1_MOUSE]	97.67	1	7	60	307	605176965	1.01248e+08	1.27029e+08	2.45951e+08	1.63123e+08	2.27398e+08	4.47468e+08	133023571	2.24909e+08	6.73274e+07	2.0254e+08	3.11371e+08	1.1555e+08	3.17121e+08	3.50466e+08	169171929	1.19912e+08	2.31034e+08	2.78418e+08	1.51792e+08	1.10514e+09	1.28041e+08	1.21476e+08	1.04812e+08	1.99532e+08	1.07378e+08	2.70662e+08	7.04642e+07	1.6541e+08	1.63375e+08	2.27146e+08	1.44263e+08	1.53552e+08	3.84e+08	9.92135e+07	4.18969e+08	3.86618e+08	7.25855e+07	2.48506e+08	2.20025e+08	2.5941e+08	1.90066e+08	1.04388
P14576	Signal recognition particle 54 kDa protein OS=Mus musculus OX=10090 GN=Srp54 PE=1 SV=2 - [SRP54_MOUSE]	97.62	1	7	86	380	1.57761e+07	2.34934e+08	2.00244e+08	9.60537e+07	9.56096e+07	2.1796e+08	1.66288e+08	2.18787e+08	8.2888e+07	7.00649e+07	1.84531e+08	219208358	389697409	2.22648e+08	194428795	1.0392e+08	1.32728e+08	1.76598e+08	228422039	2.36867e+08	1.3838e+08	1.35248e+08	2.59806e+08	9.33697e+07	1.68968e+08	2.22691e+08	2.29431e+08	3.14319e+08	1.6305e+08	1.67675e+08	7.07859e+07	5.8161e+07	207416922	1.984e+08	1.87673e+08	4.12609e+08	1.94922e+08	246215639	1.28523e+08	1.51198e+08	2.42103e+08	1.75707e+08	1.88372
P60879	Synaptosomal-associated protein 25 OS=Mus musculus OX=10090 GN=Snap25 PE=1 SV=1 - [SNP25_MOUSE]	97.57	2	15	39	720	7.82802e+08	6.31077e+08	506451390	6.27055e+08	3.93954e+08	6.93152e+08	799242075	6.74494e+08	5.11173e+08	2.63985e+08	6.23349e+08	7.22759e+08	675120448	7.35462e+08	6.28342e+08	5.71085e+08	4.17028e+08	5.48926e+08	5.39058e+08	7.52493e+08	4.12825e+08	4.39499e+08	3.63592e+08	593268411	5.51232e+08	6.08047e+08	8.32974e+08	6.29324e+08	735012985	6.05816e+08	4.57036e+08	5.45461e+08	932803529	7.90823e+08	5.9358e+08	1.32395e+09	819164236	6.93972e+08	5.88268e+08	5.88409e+08	6.77006e+08	5.65718e+08	1.15085
P80314	T-complex protein 1 subunit beta OS=Mus musculus OX=10090 GN=Cct2 PE=1 SV=4 - [TCPB_MOUSE]	97.57	1	39	94	1375	6.77615e+08	5.34783e+08	408579395	4.48178e+08	400876337	7.10236e+08	6.70966e+08	552648577	5.30167e+08	3.67286e+08	6.93877e+08	8.8493e+08	4.60035e+08	727483470	5.21757e+08	5.41443e+08	5.85921e+08	475221205	6.25054e+08	7.73442e+08	4.95084e+08	5.48908e+08	505591944	5.96237e+08	6.33633e+08	6.85917e+08	8.15788e+08	5.99837e+08	7.15012e+08	6.67757e+08	450255481	576621554	6.19531e+08	8.63899e+08	598800705	1.07793e+09	610366226	6.80416e+08	4.94006e+08	5.66261e+08	6.57616e+08	6.00216e+08	1.33119
Q9Z2Q6	Septin-5 OS=Mus musculus OX=10090 GN=Septin5 PE=1 SV=2 - [SEPT5_MOUSE]	97.56	2	20	56	1249	2.29406e+09	1.16725e+09	1.17575e+09	1.52085e+09	1.16475e+09	1.761e+09	1.73368e+09	1.6016e+09	1.6179e+09	9.28287e+08	1.4916e+09	2.11555e+09	1.37545e+09	1.9794e+09	1.41777e+09	1.28601e+09	1.98863e+09	1.33264e+09	1.75405e+09	1.83219e+09	1.30355e+09	1.49461e+09	1.22692e+09	1.575e+09	1.38006e+09	1.39059e+09	2.28146e+09	1.59315e+09	1697099620	1456035640	1.42216e+09	1.70367e+09	1936643746	2.08699e+09	1.35098e+09	2.50153e+09	1.94698e+09	1.9474e+09	1.46453e+09	1.52849e+09	1.67595e+09	1.63871e+09	1.14436
Q62188	Dihydropyrimidinase-related protein 3 OS=Mus musculus OX=10090 GN=Dpysl3 PE=1 SV=1 - [DPYL3_MOUSE]	97.54	1	24	60	2096	8715994618	4.30565e+09	3.49997e+09	4.51758e+09	3.08999e+09	7.74009e+09	6.61691e+09	4.59898e+09	4.89386e+09	2.87003e+09	6.83456e+09	6.98497e+09	4.16232e+09	5.96318e+09	4.46819e+09	4.84109e+09	4.79178e+09	4.19559e+09	5.30598e+09	6119985579	3.83304e+09	4.50274e+09	3.92057e+09	5.16557e+09	6.08958e+09	5.18422e+09	6.77009e+09	4.59423e+09	6150622938	4.99795e+09	4.04284e+09	4.70628e+09	4932934723	6.73388e+09	5.55754e+09	7.88417e+09	6.12368e+09	5922501427	4.82584e+09	5.34397e+09	5.68264e+09	5.05088e+09	1.17755
Q9QXB9	Developmentally-regulated GTP-binding protein 2 OS=Mus musculus OX=10090 GN=Drg2 PE=1 SV=1 - [DRG2_MOUSE]	97.53	1	11	46	246	1.29112e+08	156778484	1.28862e+08	1.65887e+08	1.40327e+08	9.70779e+07	2.4892e+08	4.22813e+07	1.66205e+08	8.07664e+07	1.1273e+08	1.59527e+08	1.36866e+08	1.41079e+08	1.07014e+08	3.97061e+08	8.60715e+07	2.89734e+08	4.04479e+07	3.40416e+08	2.54445e+07	6.65623e+07	1.7884e+08	1.76433e+08	2.80819e+08	1.93429e+08	1.79556e+08	1.31335e+08	1.38701e+08	2.02015e+08	1.36351e+08	4.64347e+07	9.10167e+07	2.34132e+08	2.54279e+08	1.70939e+08	2.47123e+08	2.41431e+08	1.44193e+08	1.2705e+08	1.31443e+08	2.30746e+08	0.911576
P58389	Serine/threonine-protein phosphatase 2A activator OS=Mus musculus OX=10090 GN=Ptpa PE=1 SV=1 - [PTPA_MOUSE]	97.52	1	14	36	383	5.34889e+08	3.74702e+08	4.06932e+08	3.77895e+08	3.47862e+08	4.82959e+08	6.13912e+08	4.59386e+08	5.39682e+08	2.91205e+08	4.02805e+08	5.67333e+08	4.94152e+08	5.22082e+08	5.37049e+08	4.66351e+08	4.27741e+08	4.56023e+08	4.90678e+08	6.72976e+08	3.85382e+08	3.65106e+08	468844136	445401529	3.88295e+08	4.57251e+08	6.45261e+08	4.18076e+08	6.48449e+08	527064897	3.77109e+08	5.27403e+08	5.92814e+08	6.32181e+08	3.87502e+08	7.09928e+08	6.51106e+08	5.71328e+08	4.08456e+08	4.77429e+08	5.04684e+08	5.02754e+08	1.23559
Q9JM14	5'(3')-deoxyribonucleotidase, cytosolic type OS=Mus musculus OX=10090 GN=Nt5c PE=1 SV=1 - [NT5C_MOUSE]	97.5	1	9	25	305	2.4195e+08	1.98754e+08	1.62759e+08	217965383	1.59873e+08	2.58974e+08	3.20812e+08	2.53586e+08	2.8044e+08	1.32564e+08	1.96448e+08	380282512	2.16121e+08	3.28818e+08	2.28675e+08	221902468	258515044	2.14157e+08	2.29627e+08	3.24454e+08	1.75775e+08	2.70356e+08	2.12356e+08	2.23784e+08	2.451e+08	2.49452e+08	3.85623e+08	3.06548e+08	3.31983e+08	251900397	1.91215e+08	2.77984e+08	2.85384e+08	3.49617e+08	2.42565e+08	4.58142e+08	2.48383e+08	3.11258e+08	1.9626e+08	2.49275e+08	2.70069e+08	2.49731e+08	1.37608
Q9WVA4	Transgelin-2 OS=Mus musculus OX=10090 GN=Tagln2 PE=1 SV=4 - [TAGL2_MOUSE]	97.49	1	9	33	580	6.30254e+09	3872642907	4.02506e+09	5.0484e+09	3.84382e+09	5.88668e+09	5.95395e+09	5.11319e+09	5.50442e+09	3.40795e+09	5.91632e+09	6.86082e+09	4.71066e+09	7.12831e+09	5.59197e+09	4.75214e+09	5.12223e+09	4.85329e+09	6.82313e+09	6643676321	4.68599e+09	5.34902e+09	4.72756e+09	4.37069e+09	4.74613e+09	5.06369e+09	6.78654e+09	5.74388e+09	6.19286e+09	5.33273e+09	4.53974e+09	6.05836e+09	6.56337e+09	5.87134e+09	5.07131e+09	8.02336e+09	6103156555	6.19014e+09	4.61849e+09	5.17324e+09	6.04162e+09	5.63889e+09	1.30814
P01887	Beta-2-microglobulin OS=Mus musculus OX=10090 GN=B2m PE=1 SV=2 - [B2MG_MOUSE]	97.48	1	1	6	8	3.0122e+08	142206015	0	3.76152e+06	0	0	179689446	0	0	0	2.56203e+07	405369744	0	0	0	0	0	1.39139e+08	0	0	0	0	6.40207e+07	1.87882e+06	4.55745e+07	0	0	0	0	0	0	0	0	1.64725e+08	0	0	0	0	8.94375e+07	3.59379e+07	8.6198e+07	2.78278e+07	0.963779
P62869	Elongin-B OS=Mus musculus OX=10090 GN=Elob PE=1 SV=1 - [ELOB_MOUSE]	97.46	1	10	11	389	5.80437e+08	2.64299e+08	2.75098e+08	3.36079e+08	233876704	4.54292e+08	4.21934e+08	3.2999e+08	3.45891e+08	2.62724e+08	3.95069e+08	4.70358e+08	2.85784e+08	3.94368e+08	3.34104e+08	3.35603e+08	3.31085e+08	2.74056e+08	3.84407e+08	3.83933e+08	3.04698e+08	2.78656e+08	2.74146e+08	3.4759e+08	4.17094e+08	3.8931e+08	4.92071e+08	3.70888e+08	3.68071e+08	3.51622e+08	3.12155e+08	3.23179e+08	3.95917e+08	4.31459e+08	4.04584e+08	5.28602e+08	4.49526e+08	4.15726e+08	3.37958e+08	3.62966e+08	3.75936e+08	3.41817e+08	1.11238
Q9CRC9	Glucosamine-6-phosphate isomerase 2 OS=Mus musculus OX=10090 GN=Gnpda2 PE=1 SV=1 - [GNPI2_MOUSE]	97.46	1	6	27	123	137996567	9.47867e+07	6.46038e+07	6.72048e+07	7.89159e+07	1.57902e+08	7.60831e+07	7.34436e+07	27988594	64842326	115331703	1.41397e+08	78774725	9.4781e+07	6.44706e+07	4.92153e+07	8.53852e+07	6.05567e+07	83357951	1.30374e+08	6.54257e+07	6.53268e+07	1.11872e+08	9.81664e+07	6.06549e+07	8.92259e+07	1.09006e+08	0	4.63501e+08	7.38979e+07	5.49821e+08	1.75102e+08	7.39115e+07	8.83721e+07	57608208	1.40696e+08	68099215	113173558	8.87015e+07	8.00518e+07	9.8951e+07	8.17778e+07	1.11555
P54797	Transport and Golgi organization 2 homolog OS=Mus musculus OX=10090 GN=Tango2 PE=1 SV=1 - [TNG2_MOUSE]	97.46	1	3	25	77	942047428	4.64349e+08	685681	6.11647e+08	2.14669e+07	7.32248e+08	4.82353e+08	8.68349e+08	5.32718e+08	2.01048e+08	485943037	4.78222e+08	4.53027e+08	1.94316e+07	4.49569e+08	25391970	751719988	782897505	9.95032e+08	2.05165e+08	3.13877e+08	3.56192e+08	1054216611	4.60376e+08	3.09138e+08	3.75555e+08	5.02183e+08	7.48988e+08	615037559	1.13797e+08	4.22001e+08	2.4951e+08	3.82464e+08	5.0433e+08	4.6299e+08	7.1438e+08	478100983	4.4389e+08	4.08039e+08	5.63343e+08	3.77239e+08	5.52041e+08	0.924516
P53810	Phosphatidylinositol transfer protein alpha isoform OS=Mus musculus OX=10090 GN=Pitpna PE=1 SV=2 - [PIPNA_MOUSE]	97.42	1	23	48	705	1092119525	5.94911e+08	529287120	5.03924e+08	5.18431e+08	9.24592e+08	1.50166e+09	8.68972e+08	8.3381e+08	5.29824e+08	9.26948e+08	9.11174e+08	5.4633e+08	8.52917e+08	5.24086e+08	7.30492e+08	798196470	607594528	7.80586e+08	9.89244e+08	3.72861e+08	7.04821e+08	7.26325e+08	8.89011e+08	8.59318e+08	7.81801e+08	8.7995e+08	7.33739e+08	7.78317e+08	1.02384e+09	7.49206e+08	8.97376e+08	9.01892e+08	1.36427e+09	6.58015e+08	1.1372e+09	7.68103e+08	7.304e+08	6.47735e+08	9.31772e+08	7.52291e+08	7.81222e+08	1.16142
P50516	V-type proton ATPase catalytic subunit A OS=Mus musculus OX=10090 GN=Atp6v1a PE=1 SV=2 - [VATA_MOUSE]	97.41	1	50	89	4097	3.61398e+09	2.34701e+09	2.18752e+09	2.62623e+09	2.13497e+09	3.50771e+09	3.6922e+09	3.01832e+09	3.27602e+09	2280297887	3.30862e+09	4.07478e+09	3.35899e+09	3.69545e+09	2.71202e+09	3.01328e+09	2364316759	2.59913e+09	3.23462e+09	4.45535e+09	2.27286e+09	2362846172	3598157708	2.73937e+09	2.70631e+09	2496245679	3.4619e+09	5.16356e+09	5.60047e+09	2.74537e+09	3.15064e+09	4.69516e+09	4.4835e+09	3.97601e+09	3.21365e+09	5519957897	3.11733e+09	3.59491e+09	2.58194e+09	3.15491e+09	3.42997e+09	3.13334e+09	1.32845
P68037	Ubiquitin-conjugating enzyme E2 L3 OS=Mus musculus OX=10090 GN=Ube2l3 PE=1 SV=1 - [UB2L3_MOUSE]	97.4	1	10	21	461	6.19795e+08	8.40804e+08	6.42145e+08	6.96345e+08	511955727	4.81619e+08	1236276940	5.95305e+08	8.54438e+08	3.2943e+08	1198735108	1.04711e+09	5.62561e+08	1.0446e+09	5.12641e+08	9.518e+08	5.87854e+08	3.38213e+08	1.10007e+09	1.36488e+09	7.39147e+08	8.23465e+08	6.52297e+08	774543062	1.15477e+09	1.09588e+09	908783543	9.00285e+08	1.20617e+09	1.1938e+09	7.98926e+08	6.18976e+08	9.30215e+08	1.1436e+09	923668357	1246532755	1047761066	1.18136e+09	6.62209e+08	6.99414e+08	8.7313e+08	8.68564e+08	1.31851
P99027	60S acidic ribosomal protein P2 OS=Mus musculus OX=10090 GN=Rplp2 PE=1 SV=3 - [RLA2_MOUSE]	97.39	1	8	16	351	6.90591e+08	4.20307e+08	4.81315e+08	6.5655e+08	4.82889e+08	6.92174e+08	6.22559e+08	7.06143e+08	6.87723e+08	4.35226e+08	5.01725e+08	7.90372e+08	5.33286e+08	8.58488e+08	6.9601e+08	4.75688e+08	6.50772e+08	6.13045e+08	6.40814e+08	899891705	5.5098e+08	6.00241e+08	5.59106e+08	698636544	4.91849e+08	6.13473e+08	9.70942e+08	6.70244e+08	7.69548e+08	6.25719e+08	4.66447e+08	6.23954e+08	8.25099e+08	8.2125e+08	4.77772e+08	1.09743e+09	763317268	908510048	5.46331e+08	6.28765e+08	6.75976e+08	6.56042e+08	1.2373
P63038	60 kDa heat shock protein, mitochondrial OS=Mus musculus OX=10090 GN=Hspd1 PE=1 SV=1 - [CH60_MOUSE]	97.38	1	39	90	2452	1.59511e+09	9.57395e+08	7.40106e+08	1.21562e+09	1.83861e+09	3.80765e+09	1.85869e+09	1.08688e+09	1.14614e+09	1.60598e+09	3809411942	2333348760	1.20659e+09	1500641780	1.5862e+09	3087229115	1.76756e+09	1.54463e+09	1.32484e+09	3.0572e+09	6.57782e+08	2.07418e+09	1.74157e+09	1.33574e+09	3.14624e+09	1.40168e+09	1.9165e+09	2236880700	3.04436e+09	9.15823e+08	1.38367e+09	2.77133e+09	1.68208e+09	2085525219	1.00899e+09	2.03992e+09	1492353975	1.32769e+09	1.26937e+09	1.90107e+09	2.08724e+09	2.15629e+09	1.64432
O35098	Dihydropyrimidinase-related protein 4 OS=Mus musculus OX=10090 GN=Dpysl4 PE=1 SV=1 - [DPYL4_MOUSE]	97.38	1	27	66	1375	4.20642e+09	2004980834	1.87645e+09	8.92314e+08	1.68863e+09	3.73955e+09	3.47036e+09	2.14967e+09	2.45099e+09	5.73068e+08	3125681278	3217815196	2099798377	3.11834e+09	870403938	2.55825e+09	2.2586e+09	2.18282e+09	2.63151e+09	3.16506e+09	1.95735e+09	2.25324e+09	2.06322e+09	2.53482e+09	2916973271	2487510441	1406225002	8.73703e+08	3071831487	2.60764e+09	2.08689e+09	2.55778e+09	2691648372	2970286715	2.8159e+09	1741445282	1.08525e+09	1.13829e+09	2.13376e+09	2.47673e+09	2.48641e+09	2.55925e+09	1.16527
Q9CQ92	Mitochondrial fission 1 protein OS=Mus musculus OX=10090 GN=Fis1 PE=1 SV=1 - [FIS1_MOUSE]	97.37	1	5	22	232	4.83614e+07	5.05318e+07	5.41316e+07	5.89358e+07	4.47457e+07	3.08453e+07	1.24727e+08	5.43645e+07	6.39296e+07	2.19636e+07	6.03075e+07	9.08213e+07	6.04539e+07	5.51952e+07	5.39934e+07	4.8952e+07	3.53153e+07	5.36296e+07	5.03376e+07	6.65483e+07	1.74473e+07	3.70419e+07	3.99432e+07	6.03838e+07	4.47874e+07	1.05654e+08	7.99462e+07	6.76849e+07	7.82416e+07	5.96138e+07	2.61731e+07	4.48079e+07	5.67954e+07	8.14765e+07	5.3767e+07	1.46809e+08	5.70044e+07	6.72121e+07	5.13413e+07	5.9166e+07	6.41543e+07	5.09565e+07	1.24957
Q01768	Nucleoside diphosphate kinase B OS=Mus musculus OX=10090 GN=Nme2 PE=1 SV=1 - [NDKB_MOUSE]	97.37	1	6	23	761	3.17086e+09	1.48354e+09	1705255230	2.42618e+09	1.68504e+09	2.53007e+09	2.86955e+09	1.77321e+09	2.4953e+09	1.6228e+09	3.20083e+09	2.87146e+09	1.69745e+09	2.98643e+09	2.15718e+09	2.03478e+09	1.73978e+09	2.20661e+09	2.67515e+09	3280333011	2.27978e+09	2.18936e+09	1.95038e+09	1.50599e+09	2.58589e+09	1.93153e+09	2.54585e+09	2.65696e+09	2.70506e+09	2.70402e+09	1.82857e+09	2.24332e+09	2.56195e+09	2.71077e+09	1889252859	3.21485e+09	2494698367	2.2797e+09	2.09417e+09	2.25819e+09	2.58267e+09	2.38733e+09	1.23326
P15532	Nucleoside diphosphate kinase A OS=Mus musculus OX=10090 GN=Nme1 PE=1 SV=1 - [NDKA_MOUSE]	97.37	1	11	24	924	3.51309e+09	1.52971e+09	1.77453e+09	2.42618e+09	1.68504e+09	3.02186e+09	2.86955e+09	1.8581e+09	2.4953e+09	1.6228e+09	3.20083e+09	2.87146e+09	1.72395e+09	2.98643e+09	2.15718e+09	2.03478e+09	1.73978e+09	2.20661e+09	2.67515e+09	3280333011	2.27978e+09	2.18936e+09	1.95038e+09	1.55142e+09	2.58589e+09	1.93687e+09	2.54585e+09	2.65696e+09	2.70506e+09	2.70402e+09	1.82857e+09	2.24332e+09	2.56195e+09	2.76896e+09	2.17528e+09	3.21485e+09	2494698367	2.2797e+09	2.18571e+09	2.37352e+09	2.58797e+09	2.38733e+09	1.18404
Q9R257	Heme-binding protein 1 OS=Mus musculus OX=10090 GN=Hebp1 PE=1 SV=2 - [HEBP1_MOUSE]	97.37	1	6	22	134	1.04042e+08	56454441	53461175	5.74211e+07	7.53419e+07	9.52938e+07	91368272	7.5787e+07	7.24761e+07	3.73716e+07	6.14354e+07	1.17498e+08	7.16152e+07	9.62265e+07	5.34724e+07	4.911e+07	6.41335e+07	6.21771e+07	1.21573e+08	0	8.05559e+07	6.87074e+07	5.34352e+07	1.29139e+08	8.01006e+07	6.01504e+07	1.02104e+08	6.31401e+07	8.34285e+07	7.45372e+07	6.84964e+07	7.29542e+07	7.03827e+07	1.19113e+08	8.14363e+07	1.14543e+08	3.64998e+07	6.98445e+07	6.9344e+07	7.44594e+07	8.00495e+07	5.93986e+07	1.15438
O09114	Prostaglandin-H2 D-isomerase OS=Mus musculus OX=10090 GN=Ptgds PE=1 SV=1 - [PTGDS_MOUSE]	97.35	1	6	22	204	2.64349e+08	1.22931e+08	3.01686e+08	1.39212e+08	2.17625e+08	212986695	2.69475e+08	2.23692e+08	2.06842e+08	9.41714e+07	4.31441e+08	2.61492e+08	3.44631e+08	3.74753e+08	2.13652e+08	2.20158e+08	187142539	2.71813e+08	2.33227e+08	3.11855e+08	4.3318e+08	4.4077e+08	1.98761e+08	1.95202e+08	1.53443e+08	1.41473e+08	2.25819e+08	5.26616e+08	3.43573e+08	3.97729e+08	285688957	371992480	3.66319e+08	2.19285e+08	2.00369e+08	2.23924e+08	2.39836e+08	2.19026e+08	2.09161e+08	2.01433e+08	3.25194e+08	2.44839e+08	1.55476
Q91WQ3	Tyrosine--tRNA ligase, cytoplasmic OS=Mus musculus OX=10090 GN=Yars1 PE=1 SV=3 - [SYYC_MOUSE]	97.35	1	33	81	790	2.62621e+08	1.27531e+08	3.04742e+08	1.08434e+08	1.72392e+08	2.39013e+08	8.35301e+08	2.54167e+08	1.92883e+08	1.61547e+08	2.12438e+08	3.17343e+08	2.43691e+08	2.38021e+08	1.93672e+08	1.34907e+08	2.3902e+08	3.20002e+08	1.39884e+08	3.12515e+08	1.67269e+08	2.69069e+08	1.82521e+09	2.05379e+08	2.39031e+08	2.62928e+08	2.43083e+08	1.23505e+08	2.40852e+08	2.03475e+08	113135859	1.63304e+08	3.14262e+08	3.04273e+08	2.01453e+08	4.97008e+08	2.37423e+08	5.41105e+08	1.95144e+08	3.36582e+08	2.41033e+08	2.29266e+08	1.23515
Q9R1P4	Proteasome subunit alpha type-1 OS=Mus musculus OX=10090 GN=Psma1 PE=1 SV=1 - [PSA1_MOUSE]	97.34	1	18	40	530	6.45495e+08	3.05256e+08	3.19033e+08	3.55547e+08	2.07372e+08	4.58949e+08	5.14388e+08	2.73732e+08	3.72709e+08	1.4801e+08	4.45541e+08	5.28107e+08	3.50407e+08	5.12232e+08	1.90122e+08	3.89575e+08	2.88107e+08	3.82794e+08	4.38215e+08	2.9486e+08	3.05181e+08	3.64058e+08	302115022	3.55128e+08	366765397	2.78244e+08	518727127	270062180	525743296	4.70169e+08	2.47355e+08	4.44405e+08	4.89397e+08	6.02911e+08	4.14481e+08	753041827	2.65458e+08	3.55578e+08	3.66541e+08	3.53558e+08	4.05282e+08	3.5871e+08	1.10569
O88271	Craniofacial development protein 1 OS=Mus musculus OX=10090 GN=Cfdp1 PE=1 SV=1 - [CFDP1_MOUSE]	97.29	1	4	47	236	1.3531e+08	1.96565e+08	56738084	4.99944e+07	2.80804e+07	1.03364e+08	9.4633e+07	3.54951e+07	1.0984e+08	9.01527e+07	1.3121e+08	3.76642e+08	1.58852e+08	81244783	2.48941e+08	2.44108e+08	6.40947e+07	5.85291e+07	230765596	3.37081e+08	57893652	1.36055e+08	3.61368e+07	1.15552e+09	1.50627e+08	1.83127e+08	1.42796e+08	2.99061e+08	5.84956e+07	1.56498e+08	9.77789e+07	4.90291e+07	3.85867e+07	1.76739e+08	8.71109e+07	1.42751e+08	3.02932e+08	1.64571e+08	9.33376e+07	8.6697e+07	1.99378e+08	1.86916e+08	2.13609
Q9D1D4	Transmembrane emp24 domain-containing protein 10 OS=Mus musculus OX=10090 GN=Tmed10 PE=1 SV=1 - [TMEDA_MOUSE]	97.26	1	5	26	172	7.70321e+07	6.2504e+07	3.75438e+07	9.87297e+07	66267887	5.41321e+07	1.0353e+08	96473187	7.33842e+07	4.05866e+07	8.05592e+07	1.00121e+08	1.01316e+08	1.26602e+08	9.48981e+07	83687979	56243423	5.88505e+07	8.31023e+07	6.81027e+07	5.33078e+07	6.13453e+07	8.67568e+07	6.05257e+07	7.95123e+07	8.32472e+07	1.22337e+08	9.87149e+07	2.62769e+08	1.07357e+08	6.01558e+07	7.77468e+07	8.96965e+07	1.49899e+08	8.79797e+07	1.90415e+08	7.48839e+07	1.02366e+08	6.84155e+07	7.36211e+07	1.00699e+08	6.99974e+07	1.47188
Q9QXT0	Protein canopy homolog 2 OS=Mus musculus OX=10090 GN=Cnpy2 PE=1 SV=1 - [CNPY2_MOUSE]	97.25	1	5	19	187	2.20226e+08	1.56457e+08	2.09287e+08	2.70483e+08	274276712	2.52388e+08	2.72385e+08	3.89778e+08	256996284	7.96391e+07	227184561	3.92715e+08	1.95739e+08	2.94689e+08	2.20914e+08	2.03121e+08	2.21411e+08	2.04064e+08	1.87532e+08	2.87994e+08	2.08067e+08	2.8139e+08	2.02617e+08	2.58202e+08	2.59623e+08	2.75359e+08	3.28747e+08	1.88271e+08	3.21158e+08	2.37724e+08	162799355	2.3991e+08	1.84751e+08	3.74067e+08	2.47379e+08	3.99483e+08	2.20231e+08	2.74166e+08	2.26146e+08	2.50237e+08	2.66248e+08	2.20824e+08	1.17733
Q80UU9	Membrane-associated progesterone receptor component 2 OS=Mus musculus OX=10090 GN=Pgrmc2 PE=1 SV=2 - [PGRC2_MOUSE]	97.24	1	3	29	147	3.43098e+08	4.47683e+08	38840766	611177943	157885270	5.96584e+08	2.9658e+08	326473733	9.72912e+07	3.45712e+08	6.54116e+08	1.92726e+08	3.51186e+08	7.99982e+08	7.32545e+08	4.84028e+08	1.12936e+08	2.98969e+08	7.09471e+08	7.80844e+08	1.88415e+08	1.40379e+08	2.97233e+08	6.09571e+08	4.28393e+08	0	72629786	1.26458e+08	4.14767e+08	8.54887e+08	5.40806e+07	4.50215e+08	5.3052e+08	4.11777e+08	4.87124e+08	964219370	5.62723e+08	4.25948e+08	3.19737e+08	3.32528e+08	5.46111e+08	4.7725e+08	1.708
Q8BWT1	3-ketoacyl-CoA thiolase, mitochondrial OS=Mus musculus OX=10090 GN=Acaa2 PE=1 SV=3 - [THIM_MOUSE]	97.23	1	16	47	437	5.18489e+08	1.58162e+08	1.21024e+08	1.74726e+08	1.12889e+08	2.69232e+08	187483156	1.96043e+08	4.395e+08	1.46052e+08	1.64989e+08	2.32788e+08	1.23439e+08	5.82424e+08	1.8688e+08	3.23701e+08	9.79356e+07	1.7232e+08	183815884	3.07461e+08	3.83648e+08	1.46484e+08	1.43441e+08	1.45783e+08	1.64757e+08	1.40821e+08	2.35946e+08	1.47536e+08	536069964	1.44068e+08	1.40499e+08	2.10296e+08	1.68259e+08	252319838	1.61573e+08	3.17975e+08	1.8858e+08	320974567	2.17058e+08	2.47662e+08	2.58104e+08	2.17047e+08	1.1891
Q9JMC3	DnaJ homolog subfamily A member 4 OS=Mus musculus OX=10090 GN=Dnaja4 PE=1 SV=1 - [DNJA4_MOUSE]	97.23	1	11	52	276	1.37246e+08	9.23851e+07	7.46284e+07	1.19896e+08	6.448e+07	9.25979e+07	1.27119e+08	2.82539e+07	1.49522e+08	3.34651e+07	1.72357e+08	1.28622e+10	90323497	159049383	1.6538e+08	110106881	4.37814e+07	9.37868e+09	1.06727e+10	124979829	7.04098e+07	1.83634e+08	1.17014e+08	1.40812e+08	6.04189e+07	1.28017e+08	1.99266e+08	2.17302e+08	8.44009e+07	5.49618e+07	47708280	1.13321e+08	1.24997e+08	1.82926e+08	120301117	2.06523e+08	6.39116e+07	197145087	9.7727e+07	8.61916e+07	2.68987e+09	4.06605e+09	27.5243
Q3UM45	Protein phosphatase 1 regulatory subunit 7 OS=Mus musculus OX=10090 GN=Ppp1r7 PE=1 SV=2 - [PP1R7_MOUSE]	97.23	1	24	48	866	522356403	4.7106e+08	4.94794e+08	5.5808e+08	3.49401e+08	6.7436e+08	6.67325e+08	6.36874e+08	5.69613e+08	4.61017e+08	5.26829e+08	8.04916e+08	4.61169e+08	7.20398e+08	5.10502e+08	6.18292e+08	568606609	4.28056e+08	6.44983e+08	899045770	3.4255e+08	7.14255e+08	548101080	5.4753e+08	6.19098e+08	7.368e+08	7.31401e+08	6.79308e+08	6.96918e+08	6.87104e+08	3.87982e+08	5.84798e+08	5.86325e+08	9.53266e+08	5.75984e+08	1.00096e+09	5.22712e+08	6.08836e+08	4.79138e+08	6.01838e+08	6.04763e+08	6.31797e+08	1.26219
Q9WUD8	Fas apoptotic inhibitory molecule 1 OS=Mus musculus OX=10090 GN=Faim PE=1 SV=1 - [FAIM1_MOUSE]	97.21	1	2	21	48	4.86671e+07	4.67384e+07	0	0	2.60542e+07	5.15344e+07	3.48881e+07	12062584	2.16901e+07	18710385	0	4.76625e+07	3.9849e+07	0	7.4937e+06	3.50745e+07	2.37316e+07	0	9.58085e+07	2.85329e+06	0	1.96085e+07	0	3.87635e+06	35279984	2.5605e+07	1.81777e+07	4.12759e+06	6.0947e+06	4.60671e+07	7.47519e+07	0	0	2.87941e+07	2.64913e+07	6.57445e+07	4.21637e+07	4.12392e+06	2.42919e+07	2.77771e+07	1.9001e+07	3.14936e+07	0.782195
P20152	Vimentin OS=Mus musculus OX=10090 GN=Vim PE=1 SV=3 - [VIME_MOUSE]	97.21	1	16	67	314	2444916126	3.8739e+07	2.31908e+08	1.10021e+09	1.48346e+08	2.0819e+08	8.88746e+08	1.05418e+09	1.11115e+09	1.66909e+08	1.01632e+09	403773877	6.66655e+08	1.17412e+09	2.36659e+08	1.05901e+09	6.39428e+08	7.34041e+08	4.26793e+08	3.74083e+08	1.79126e+09	1146792410	3.81783e+08	8.68896e+08	1.18247e+09	1378148713	3.3563e+08	1.42975e+09	7.1743e+08	298577223	8.61046e+08	2.89255e+08	1.49733e+09	4.37489e+08	3.80393e+08	2.54305e+09	1.36866e+09	3.24436e+08	7.92823e+08	6.85834e+08	6.99506e+08	6.46672e+08	0.882298
Q9WVK4	EH domain-containing protein 1 OS=Mus musculus OX=10090 GN=Ehd1 PE=1 SV=1 - [EHD1_MOUSE]	97.19	1	15	62	689	4.54292e+08	1.71807e+08	214536027	2.32261e+08	1.97253e+08	3.641e+08	3.34288e+08	1.90632e+08	2.34873e+08	1.77898e+08	3.78119e+08	3.4941e+08	2.19728e+08	3.23589e+08	2.21154e+08	3.70173e+08	2.41366e+08	2.02575e+08	3.17903e+08	3.51969e+08	2.04277e+08	2.01823e+08	1.99511e+08	1.91776e+08	3.36452e+08	2.71324e+08	3.83641e+08	3.13838e+08	3.11947e+08	2.92796e+08	2.12707e+08	3.27087e+08	308370588	2.99607e+08	2.39014e+08	4.73627e+08	3.95859e+08	3.48525e+08	2.5403e+08	2.60358e+08	2.984e+08	2.96797e+08	1.17466
Q3ULJ0	Glycerol-3-phosphate dehydrogenase 1-like protein OS=Mus musculus OX=10090 GN=Gpd1l PE=1 SV=2 - [GPD1L_MOUSE]	97.15	2	14	46	508	5.99544e+08	2.73549e+08	2.85492e+08	3.55645e+08	2.72727e+08	6.37516e+08	4.88129e+08	3.34589e+08	4.20392e+08	2.88954e+08	4.56668e+08	490283768	3.65619e+08	4.6462e+08	4.1827e+08	3.80442e+08	3.87954e+08	3.3228e+08	3.97896e+08	6.23916e+08	3.12849e+08	3.29413e+08	4.44162e+08	3.90421e+08	4.0057e+08	402682466	5.12864e+08	6.51597e+08	6.31118e+08	3.50312e+08	4.06965e+08	5.16358e+08	5.77022e+08	5.07981e+08	3.94775e+08	5.65296e+08	4.34527e+08	4.33216e+08	3.57391e+08	433916012	4.39092e+08	4.24498e+08	1.2286
P10639	Thioredoxin OS=Mus musculus OX=10090 GN=Txn PE=1 SV=3 - [THIO_MOUSE]	97.14	1	6	13	215	5.66487e+08	6.22349e+08	6.07019e+08	7.73061e+08	5.14519e+08	2.4202e+08	1.21183e+09	8.53867e+08	8.96127e+08	4.91678e+08	3.37837e+08	1201517078	7.38625e+08	1.09901e+09	6.886e+08	3.51916e+08	6.61848e+08	6.4947e+08	8.84855e+08	1.00065e+09	2.65336e+08	6.27762e+08	6.91007e+08	8.85744e+08	809256165	7.69597e+08	1.89471e+09	7.94504e+08	1.10699e+09	2.20119e+08	6.27751e+08	7.55974e+08	8.60555e+08	1.25196e+09	7.94833e+08	1.40229e+09	1.13005e+09	1.01062e+09	6.16687e+08	7.39105e+08	8.13118e+08	7.09747e+08	1.31853
P45878	Peptidyl-prolyl cis-trans isomerase FKBP2 OS=Mus musculus OX=10090 GN=Fkbp2 PE=1 SV=1 - [FKBP2_MOUSE]	97.14	1	6	20	157	253430814	1.42665e+08	1.06255e+08	1.58128e+08	9.05409e+07	1.7464e+08	1.84123e+08	1.54812e+08	1.34439e+08	9.68248e+07	1.47639e+08	2.15551e+08	1.46994e+08	150228838	78270710	1.21215e+08	4.20693e+07	1.24134e+08	1.28996e+08	1.70073e+08	2.19619e+08	8.2295e+07	9.58866e+07	1.32024e+08	175045276	1.37771e+08	1.21125e+08	89022883	9.28497e+07	1.47125e+08	6.93731e+07	1.63296e+08	1.857e+08	8.73505e+07	1.28843e+08	2.41364e+08	1.65057e+08	1.79741e+08	1.50204e+08	1.48968e+08	1.47737e+08	1.17297e+08	0.983575
Q8BFR5	Elongation factor Tu, mitochondrial OS=Mus musculus OX=10090 GN=Tufm PE=1 SV=1 - [EFTU_MOUSE]	97.12	1	28	64	801	6.41771e+08	5.03556e+08	3.88701e+08	4.63682e+08	3.05996e+08	7.57579e+08	6.24935e+08	6.27266e+08	3.99651e+08	3.87875e+08	5.44381e+08	8.31955e+08	3.9987e+08	3.96452e+08	3.51709e+08	5.12183e+08	4.01064e+08	3.61921e+08	4.49547e+08	7.03213e+08	4.35531e+08	3.36264e+08	3.78326e+08	594943231	5.06793e+08	676244726	561661710	4.74647e+08	7.01297e+08	479734373	5.62001e+08	6.7843e+08	630635813	8.32443e+08	5.2481e+08	9.0803e+08	6.47495e+08	4.4701e+08	4.60741e+08	5.59461e+08	5.04873e+08	4.85586e+08	1.09579
P47757	F-actin-capping protein subunit beta OS=Mus musculus OX=10090 GN=Capzb PE=1 SV=3 - [CAPZB_MOUSE]	97.11	1	14	45	724	9.07849e+08	5.47927e+08	4.84939e+08	5.95455e+08	4.20608e+08	9.41058e+08	7.77922e+08	6.67024e+08	5.7637e+08	3.98383e+08	7.36053e+08	9.0012e+08	5.30142e+08	6.82214e+08	5.99447e+08	599122203	5.66946e+08	539164980	5.87993e+08	7.44475e+08	5.41457e+08	5.84327e+08	535236934	5.35791e+08	6.28944e+08	7.00492e+08	7.69027e+08	638169255	7.42397e+08	6.81241e+08	5.81571e+08	6.94766e+08	7.18082e+08	1012796572	6.8963e+08	1.1174e+09	6.88638e+08	640159955	5.91356e+08	6.72151e+08	6.89595e+08	6.0754e+08	1.16613
Q9QYJ0	DnaJ homolog subfamily A member 2 OS=Mus musculus OX=10090 GN=Dnaja2 PE=1 SV=1 - [DNJA2_MOUSE]	97.09	1	18	64	567	3.77717e+08	1.26809e+08	9.7456e+07	1.94939e+08	92816478	2.36834e+08	2.29438e+08	1.66105e+08	258117148	1.8143e+08	4.49001e+08	2.08982e+08	2.60124e+08	3.70255e+08	2.62338e+08	2.02119e+08	9.00213e+07	1.16729e+08	2.14053e+08	1996357706	5.76714e+08	1.60969e+08	4.13474e+08	1.31664e+08	356502764	3.43314e+08	3.30233e+08	4.44679e+08	2.66189e+09	2.56734e+08	3.47917e+08	5.23753e+08	1.05285e+09	2.46965e+08	1.8513e+08	3.65191e+08	1.51047e+08	6.22396e+08	1.77947e+08	2.14385e+08	3.1014e+08	5.23856e+08	1.74288
P63028	Translationally-controlled tumor protein OS=Mus musculus OX=10090 GN=Tpt1 PE=1 SV=1 - [TCTP_MOUSE]	97.09	1	8	15	402	1176052190	7.92489e+08	8.92162e+08	9.0125e+08	822126150	1.04373e+09	1.21227e+09	1.11941e+09	9.7881e+08	5.09234e+08	9.66371e+08	1.21851e+09	9.15128e+08	1.32877e+09	1.19035e+09	8.87991e+08	9.91572e+08	1061877015	1.3421e+09	1.56565e+09	8.09553e+08	9.40895e+08	9.98681e+08	1.0484e+09	1.04259e+09	9.49961e+08	1.43045e+09	1.07753e+09	1.34907e+09	9.11856e+08	9.90289e+08	1.27098e+09	1.42021e+09	1168383569	9.666e+08	1.55524e+09	1.2515e+09	1377650228	9.16816e+08	9.72692e+08	1.12383e+09	1.16984e+09	1.22579
Q9CZW5	Mitochondrial import receptor subunit TOM70 OS=Mus musculus OX=10090 GN=Tomm70 PE=1 SV=2 - [TOM70_MOUSE]	97.05	1	2	90	337	356034709	4.67213e+08	4.19654e+08	5.36133e+08	9.18355e+07	8.78012e+08	4.45693e+08	1.77611e+08	2.17515e+08	5.47528e+07	7.82473e+08	9.30145e+08	5.88002e+08	662925137	6.53227e+08	8.12303e+07	4.92221e+08	1.72263e+08	3.17426e+08	2.01056e+08	4.22233e+08	1.43987e+08	395655279	7.40185e+08	437567838	1.76922e+08	1.85236e+08	4.92411e+08	1.73456e+08	7.36186e+07	9.39574e+07	442144610	5.71289e+08	8.53148e+08	5.01497e+08	1.13852e+09	1.56264e+08	9.01823e+08	3.74174e+08	3.54717e+08	7.23354e+08	2.52839e+08	1.9332
Q7TQI3	Ubiquitin thioesterase OTUB1 OS=Mus musculus OX=10090 GN=Otub1 PE=1 SV=2 - [OTUB1_MOUSE]	97.05	1	17	26	631	1.5686e+09	8.63051e+08	9.25551e+08	1.07999e+09	8.32543e+08	1.46293e+09	1395637572	1.1344e+09	1.21069e+09	7.46379e+08	1211332868	1.48963e+09	1065179831	1536060815	1.31958e+09	1162264144	1.09161e+09	1.10778e+09	1.26036e+09	1.33912e+09	1.06228e+09	1.04066e+09	1.02944e+09	1.12425e+09	1.16129e+09	1.12322e+09	1.66677e+09	1.27669e+09	1.42773e+09	1.13935e+09	9.13474e+08	1252256326	1.30562e+09	1.42414e+09	1.04097e+09	1.69169e+09	1.2657e+09	1.43e+09	1.05395e+09	1.19001e+09	1.32436e+09	1.19223e+09	1.25657
P60843	Eukaryotic initiation factor 4A-I OS=Mus musculus OX=10090 GN=Eif4a1 PE=1 SV=1 - [IF4A1_MOUSE]	97.04	1	10	56	950	1.3187e+09	9.17979e+08	7.92568e+08	978521193	6.77416e+08	1.39488e+09	1.29562e+09	1039573308	8.95942e+08	5.2729e+08	1.10778e+09	1.47262e+09	9.10516e+08	1.17676e+09	9.59145e+08	9.8652e+08	1.008e+09	8.42505e+08	1067387575	1186736064	8.76701e+08	951713086	805912328	1.10199e+09	1.02688e+09	1208963646	1.51322e+09	994993761	1207119628	1.08186e+09	7.80604e+08	9.58443e+08	1.05809e+09	1.39979e+09	1.09548e+09	1903784914	1.10298e+09	1.31882e+09	9.37038e+08	1.03066e+09	1.12536e+09	1.01823e+09	1.20098
Q9CR09	Ubiquitin-fold modifier-conjugating enzyme 1 OS=Mus musculus OX=10090 GN=Ufc1 PE=1 SV=1 - [UFC1_MOUSE]	97.01	1	7	20	130	1.28676e+08	3.61893e+07	1.71175e+08	2.26631e+08	1.40446e+08	1.56783e+08	5.1765e+08	5.60805e+07	7.44278e+07	1.46606e+08	2.83789e+08	1.56722e+08	6.06431e+07	2.90972e+08	8.15983e+07	1.80423e+08	1.11546e+08	1.91903e+08	1.10357e+08	2.68256e+08	5.3611e+08	2.98072e+08	1.85721e+08	2.37722e+08	9.48794e+07	8.92575e+07	4.16437e+08	3.85385e+08	3.78576e+08	6.5073e+07	1.60127e+08	2.01455e+08	99061346	2.89632e+08	1.52193e+08	4.11114e+08	131441238	1.27e+08	1.40623e+08	1.90309e+08	1.74745e+08	1.72497e+08	1.24264
Q99LC5	Electron transfer flavoprotein subunit alpha, mitochondrial OS=Mus musculus OX=10090 GN=Etfa PE=1 SV=2 - [ETFA_MOUSE]	97	1	17	37	548	3.84915e+08	6.23256e+08	1.46765e+08	2.67199e+08	1.94425e+08	3.42284e+08	3.8652e+08	7.49341e+08	7.27937e+08	1.62958e+08	2.68609e+08	3.82981e+08	1.49883e+08	3.03408e+08	2.45852e+08	2.97015e+08	2.07897e+08	2.12106e+08	2.27781e+08	907607124	2.12459e+08	2.0683e+08	2.9474e+08	3.26781e+08	3.06401e+08	240485230	3.95231e+08	2.83444e+08	2.49006e+08	2.98086e+08	2.36101e+08	3.21921e+08	2.56462e+08	465005790	3.19043e+08	4.7515e+08	8.91911e+08	2.72933e+08	3.23312e+08	4.73808e+08	2.70147e+08	3.70481e+08	0.835561
Q9CZ30	Obg-like ATPase 1 OS=Mus musculus OX=10090 GN=Ola1 PE=1 SV=1 - [OLA1_MOUSE]	96.97	1	21	50	579	3.19757e+08	1.73453e+08	2.23972e+08	2.41588e+08	2.29277e+08	3.34221e+08	3.31883e+08	327537470	2.19475e+08	1.49504e+08	2.62473e+08	5.58316e+08	2.76385e+08	3.49923e+08	3.30466e+08	3.55991e+08	3.13064e+08	1.91191e+08	2.49233e+08	287200721	2.27274e+08	2.76026e+08	1.79433e+08	3.44109e+08	1.77097e+08	2.92986e+08	3.38396e+08	2.20535e+08	2.87412e+08	3.89116e+08	1.48774e+08	3.70773e+08	2.25671e+08	3.62642e+08	2.0716e+08	4.21709e+08	242147101	3.64792e+08	2.37609e+08	2.72524e+08	3.55512e+08	2.79336e+08	1.49621
Q3UGR5	Haloacid dehalogenase-like hydrolase domain-containing protein 2 OS=Mus musculus OX=10090 GN=Hdhd2 PE=1 SV=2 - [HDHD2_MOUSE]	96.91	1	11	31	711	5.66495e+08	3.06161e+08	4.09708e+08	499881071	4.44084e+08	5.10253e+08	6.74572e+08	5.27195e+08	8.5683e+08	4.83185e+08	8.81584e+08	7.07994e+08	3.35203e+09	1.02999e+09	7.35104e+08	6.55723e+08	4.83293e+08	720012277	5.76867e+08	3.15187e+09	6.45524e+08	6.03545e+08	2.47182e+09	5.58071e+08	2.66111e+09	3.85504e+08	1.60042e+09	3.69447e+08	8.62298e+08	7.63275e+08	602728694	6.5262e+08	3.8357e+08	510385430	5.93559e+08	531936995	5.95994e+08	3.90185e+08	4.45266e+08	6.10407e+08	1.34134e+09	1.11755e+09	3.01245
O35295	Transcriptional activator protein Pur-beta OS=Mus musculus OX=10090 GN=Purb PE=1 SV=3 - [PURB_MOUSE]	96.91	1	11	43	681	1.62421e+09	7.14441e+08	5.07595e+08	4.00841e+09	4.9813e+08	1129501703	5.37976e+08	4.14978e+08	8.9179e+08	411817921	1483119353	670578897	5.91378e+08	5.35736e+09	9.49563e+08	9.37339e+08	606639984	5.99293e+08	7.12872e+08	1.25443e+09	8.29471e+08	4.09149e+08	5.96338e+08	8.02698e+08	1.08584e+09	4.50032e+09	8.96027e+08	6.98781e+08	1.35585e+09	9.2133e+08	3.26633e+08	4.10493e+09	7.00241e+08	6.70404e+08	7.24535e+08	1.47827e+10	684884431	1.10605e+09	1.47056e+09	6.77213e+08	1.8104e+09	8.22114e+08	1.2311
Q921E2	Ras-related protein Rab-31 OS=Mus musculus OX=10090 GN=Rab31 PE=1 SV=1 - [RAB31_MOUSE]	96.91	2	1	17	69	756126521	5.17084e+07	7.02288e+08	2.33806e+08	7.48651e+07	2.69219e+08	2.3778e+08	168586575	1.86177e+08	1.48776e+08	203569355	384113141	9.42349e+07	2.32858e+08	1.51647e+08	8.69175e+07	214517640	1.0571e+08	1.29335e+09	2.21673e+08	2.65754e+08	332651685	1.11005e+08	8.18501e+07	9.7323e+07	190563628	178610136	1.62691e+08	1.33012e+08	284315012	1.4045e+08	1.65363e+08	202655392	1.98598e+08	1.52183e+08	1.97578e+08	2.10125e+08	2.87136e+08	3.63759e+08	2.02108e+08	2.13285e+08	3.84433e+08	0.586335
Q91XV3	Brain acid soluble protein 1 OS=Mus musculus OX=10090 GN=Basp1 PE=1 SV=3 - [BASP1_MOUSE]	96.9	1	20	34	1163	9.75393e+08	9.30281e+08	8.11694e+08	1.18488e+09	6.73455e+08	1.066e+09	1.16398e+09	1.33774e+09	9.19246e+08	7.54371e+08	7.85081e+08	1.08466e+09	1.49023e+09	1.71624e+09	8.10375e+08	5.72333e+08	5.49012e+08	9.5083e+08	1.08216e+09	1.30927e+09	5.42427e+08	6.61634e+08	6.95632e+08	1.33694e+09	1.04751e+09	5.82283e+08	1.24166e+09	6.89606e+08	1.37975e+09	1341483533	4.94318e+08	5.7811e+08	1.26179e+09	1.31163e+09	6.74231e+08	2.05162e+09	1.52182e+09	1.16886e+09	9.1514e+08	1.04827e+09	1.17732e+09	8.92722e+08	1.28649
P84075	Neuron-specific calcium-binding protein hippocalcin OS=Mus musculus OX=10090 GN=Hpca PE=1 SV=2 - [HPCA_MOUSE]	96.89	1	5	30	603	3051821317	5.92501e+08	586827513	8.35838e+08	6.36142e+08	8.33021e+08	7.0865e+08	9.1748e+08	8.71706e+08	4.25384e+08	9.43473e+08	8.72027e+08	8.86823e+08	1.20209e+09	9.17006e+08	6.12706e+08	6.96341e+08	6.73088e+08	9.3754e+08	9.9052e+08	7.31042e+08	7.96183e+08	6.28889e+08	9.15146e+08	5.93337e+08	6.86693e+08	1.38168e+09	8.96317e+08	9.05911e+08	800844073	6.78464e+08	9.37446e+08	1.18184e+09	8.93735e+08	6.40318e+08	1362299151	1.00689e+09	1.23573e+09	1.14063e+09	7.51248e+08	9.64284e+08	7.82039e+08	0.845399
O70251	Elongation factor 1-beta OS=Mus musculus OX=10090 GN=Eef1b PE=1 SV=5 - [EF1B_MOUSE]	96.89	1	9	27	351	1.1097e+09	7.03284e+08	5.59813e+08	7.36188e+08	4.99765e+08	1.00964e+09	1037271697	759006927	7.20573e+08	4.00524e+08	8.2616e+08	1.0954e+09	5.94203e+08	954835549	7.9085e+08	7.4991e+08	8.00458e+08	5.80099e+08	7.97567e+08	909062053	6.87358e+08	703405356	5.2754e+08	8.34478e+08	7.64701e+08	8.01404e+08	1.25393e+09	7.24819e+08	8.49623e+08	7.94044e+08	6.2443e+08	7.47246e+08	8.50892e+08	1.05462e+09	7.38142e+08	1.34367e+09	8.17492e+08	9.81858e+08	7.2175e+08	7.85403e+08	8.5229e+08	7.67419e+08	1.18086
P26638	Serine--tRNA ligase, cytoplasmic OS=Mus musculus OX=10090 GN=Sars1 PE=1 SV=3 - [SYSC_MOUSE]	96.88	1	27	68	953	4.33111e+08	3.4156e+08	2.46046e+08	5.27863e+08	2.38463e+08	4.13723e+08	6.7657e+08	4.00061e+08	3.91952e+08	378459530	3.47669e+08	571428926	4.5211e+08	4.02522e+08	9.69009e+08	3.93828e+08	250854912	3.24679e+08	7.09267e+08	4.66417e+08	2.87575e+08	3.15079e+08	4.60644e+08	3.56382e+08	3.26149e+08	4.54447e+08	5.75329e+08	3.49423e+08	3.91387e+08	5.51184e+08	2.55955e+08	327637651	577393598	4.87519e+08	4.87581e+08	5.29842e+08	5.55632e+08	5.16714e+08	3.57409e+08	4.52153e+08	5.48548e+08	4.29009e+08	1.53479
P28738	Kinesin heavy chain isoform 5C OS=Mus musculus OX=10090 GN=Kif5c PE=1 SV=3 - [KIF5C_MOUSE]	96.86	6	29	149	1336	5.12699e+08	5.13644e+08	410070108	7.27396e+08	3.5439e+08	6.07355e+08	4.87436e+08	5.70703e+08	5.09714e+08	3.33668e+08	5.33118e+08	6.42518e+08	4.02217e+08	5.25074e+08	4.94153e+08	5381142276	6.22983e+09	4.42479e+08	4.58912e+09	373993603	3.73157e+09	4.54873e+09	3.74243e+08	491974410	5.27304e+08	5.89887e+08	6.68422e+08	4.67943e+08	6.30322e+08	5.72245e+08	6.03517e+08	4.82991e+08	6.00981e+08	6.43484e+08	5.13977e+08	785464545	5.32244e+08	6.94897e+08	5.0364e+08	5.01775e+08	5.19416e+08	3.40331e+09	1.03132
O08553	Dihydropyrimidinase-related protein 2 OS=Mus musculus OX=10090 GN=Dpysl2 PE=1 SV=2 - [DPYL2_MOUSE]	96.85	1	30	66	5727	20898296413	1.13277e+10	1.4727e+10	1.94394e+10	1.36385e+10	2.05663e+10	2.28857e+10	1.72731e+10	2.0007e+10	1.29332e+10	2.01057e+10	2.15221e+10	19210481873	2.54224e+10	2.04598e+10	1.80724e+10	1.64629e+10	1.78299e+10	22050010179	2.45482e+10	1.5771e+10	1.77747e+10	1.79302e+10	1.45238e+10	1.80915e+10	15914800120	2.04361e+10	2.21122e+10	2.46024e+10	2.55664e+10	1.64087e+10	3.16614e+10	2.33241e+10	2.13268e+10	1.79429e+10	2.92427e+10	2.61287e+10	27648804803	1.60062e+10	1.87331e+10	2.13441e+10	1.97927e+10	1.33349
Q78YZ6	Short coiled-coil protein OS=Mus musculus OX=10090 GN=Scoc PE=1 SV=1 - [SCOC_MOUSE]	96.8	1	4	15	89	79928570	0	6.10232e+07	71111041	1.01361e+07	5.79117e+08	1.61343e+08	4.97542e+07	6.97777e+07	7.1882e+07	1.67011e+08	5.59874e+07	4.74823e+08	8.498e+07	9.21284e+07	61187532	4.97273e+08	33158978	51406315	7.01533e+07	92398079	4.25306e+07	71201540	145755552	120790379	4.29397e+07	107869043	0	1.38273e+08	9.41616e+07	2.02339e+08	3.1991e+07	0	125356259	5.63348e+07	1.17545e+08	75594430	274085274	4.44398e+07	1.86375e+08	1.74986e+08	1.42636e+08	3.9376
Q91V41	Ras-related protein Rab-14 OS=Mus musculus OX=10090 GN=Rab14 PE=1 SV=3 - [RAB14_MOUSE]	96.74	7	9	22	373	1.70408e+09	1.07562e+09	991645150	1.31415e+09	7.52531e+08	1.6363e+09	2.23257e+09	1.24999e+09	1.18213e+09	5.46929e+08	1.20183e+09	2575629308	1.23738e+09	1490722376	1102858218	1.19089e+09	9.10165e+08	1.01078e+09	1.35857e+09	1330832715	7.99249e+08	989062915	8.31993e+08	1.36581e+09	907475374	1.24673e+09	1701253889	1.1542e+09	1.30054e+09	1.31605e+09	7.90804e+08	9.55897e+08	1284703816	1550625759	1265137421	2.60136e+09	1.51779e+09	1645753949	1.16761e+09	1.36958e+09	1.52168e+09	1.16025e+09	1.30325
Q9D8W5	26S proteasome non-ATPase regulatory subunit 12 OS=Mus musculus OX=10090 GN=Psmd12 PE=1 SV=4 - [PSD12_MOUSE]	96.71	2	18	60	435	1.76909e+08	7.13246e+08	1.02272e+08	1.22454e+08	8.5608e+08	1.87568e+08	2.75611e+08	1.57627e+08	1.65495e+08	6.64757e+07	1.32329e+09	2.26524e+08	1.69683e+08	1.55268e+08	1.07797e+09	1.20825e+08	1.39406e+08	1.19614e+08	1.33643e+08	3.3416e+08	1.08725e+08	1.76443e+09	3.17164e+08	1.73685e+08	1.39557e+08	1.5709e+08	2.06114e+08	3.77585e+08	4.8167e+08	1.3397e+08	1.12159e+09	2.83876e+08	1.73314e+08	894988840	1.46078e+08	271713973	1.3884e+08	2.07673e+08	3.94192e+08	1.70555e+08	5.90549e+08	1.6953e+08	1.49812
Q9WUL7	ADP-ribosylation factor-like protein 3 OS=Mus musculus OX=10090 GN=Arl3 PE=1 SV=1 - [ARL3_MOUSE]	96.7	1	10	21	270	3.42856e+08	281583677	2.29393e+08	1.68985e+08	1.37568e+08	4.19537e+08	1.81869e+08	2.40721e+08	186923369	1.33329e+08	172562357	2.92945e+08	1.68798e+08	2.28135e+08	2.0687e+08	2.96651e+08	1.94594e+08	164066806	2.08075e+08	2.44365e+08	1.12827e+08	1.79178e+08	1.82341e+08	2.0419e+08	1.60521e+08	2.25422e+08	4.2275e+08	2.04772e+08	249892109	1.46363e+08	1.38019e+08	1.89196e+08	2.14419e+08	2.72764e+08	3.54472e+08	3.57917e+08	234047882	2.36483e+08	2.32077e+08	2.32476e+08	2.13862e+08	2.2155e+08	0.921512
Q62261	Spectrin beta chain, non-erythrocytic 1 OS=Mus musculus OX=10090 GN=Sptbn1 PE=1 SV=2 - [SPTB2_MOUSE]	96.7	2	137	352	5854	2.80243e+09	1490336626	6.12386e+08	1.53514e+09	1.0705e+09	1.16441e+09	8.39351e+08	7.69728e+08	6.90501e+08	3.92094e+08	1025617788	1.11371e+09	662574064	9.63273e+08	8.23939e+08	6.9188e+08	6.38511e+08	1.31343e+09	7.59458e+08	8.28671e+08	6.07246e+08	5.67809e+08	5.9481e+08	7.30243e+08	6.05878e+08	8.7279e+08	2.38333e+09	7.56764e+08	8.36819e+08	6.70584e+08	560850035	1.52339e+09	8.90355e+08	1.27382e+09	6.81858e+08	3.14522e+09	8.38037e+08	9.17479e+08	1.50216e+09	7.71217e+08	9.17823e+08	8.4639e+08	0.611003
P61211	ADP-ribosylation factor-like protein 1 OS=Mus musculus OX=10090 GN=Arl1 PE=1 SV=1 - [ARL1_MOUSE]	96.69	1	3	25	128	4.32507e+07	2.23936e+07	4.95146e+07	1.9377e+07	5.24086e+07	31777779	8.84352e+06	5.32459e+08	2.39482e+07	8.97826e+07	1.95384e+07	7.12338e+06	1.89078e+07	1.0313e+08	1.04054e+08	4.36646e+07	0	1.5051e+07	2.18457e+08	3.3297e+07	5.11292e+06	0	7.28415e+07	1.9281e+07	1.58675e+08	3.42099e+07	8.13148e+07	49158214	4.76404e+07	5.04812e+06	6.57807e+06	2.35007e+07	8.8262e+07	8.12294e+07	109020458	5.95991e+07	2.31953e+07	8.5784e+07	3.73889e+07	1.37362e+08	5.05508e+07	6.20939e+07	1.35203
Q8BWR2	PITH domain-containing protein 1 OS=Mus musculus OX=10090 GN=Pithd1 PE=1 SV=1 - [PITH1_MOUSE]	96.68	1	10	24	184	9.31465e+07	2.06917e+08	113699972	4.78768e+07	3.82669e+07	115797771	1.08869e+08	7.55288e+07	5.64168e+07	3.89312e+07	6.74595e+07	179100283	3.99457e+07	4.07992e+07	7.74881e+07	4.7294e+07	7.02764e+07	6.82846e+07	6.00655e+07	6.54243e+07	3.73504e+07	3.97648e+07	6.27994e+07	53315185	6.82167e+07	4.89543e+07	87595857	9.14742e+07	3.95768e+07	6.58274e+07	4.28285e+07	6.5337e+07	2.77033e+07	1.00099e+08	6.93111e+07	1.35747e+08	5.98569e+07	7.92189e+07	9.99814e+07	7.91087e+07	8.09586e+07	6.22689e+07	0.809736
Q9QZS6	Heparan sulfate glucosamine 3-O-sulfotransferase 3B1 OS=Mus musculus OX=10090 GN=Hs3st3b1 PE=2 SV=2 - [HS3SB_MOUSE]	96.67	4	1	44	196	1.28215e+08	1.98727e+08	263382930	2.55496e+08	1.62556e+08	1.09057e+08	4.00519e+08	1.48076e+08	3.78606e+08	5.16436e+07	1.02117e+08	1.30896e+08	1.10831e+08	2.52961e+08	100041335	3.18675e+08	8.45626e+07	2.83316e+08	7.16123e+07	109768637	6.79008e+07	5.82225e+07	2.79451e+08	1.23396e+08	1.5592e+08	1.16556e+08	1.3362e+08	9.96586e+07	2.99088e+08	2.31448e+08	8.50865e+07	5.29805e+07	1.39594e+08	4.62599e+08	1.37957e+08	8.09819e+07	9.85584e+07	1.41294e+08	2.01675e+08	2.1758e+08	1.39369e+08	1.73587e+08	0.691058
Q9DD18	D-aminoacyl-tRNA deacylase 1 OS=Mus musculus OX=10090 GN=Dtd1 PE=1 SV=2 - [DTD1_MOUSE]	96.65	1	8	24	411	224987620	9.02624e+08	1.578e+08	2.13088e+08	1.36161e+08	2.34694e+08	2.37833e+08	1.5178e+08	2.18139e+08	1.12825e+09	227510395	2.21944e+08	9.05179e+08	2.67508e+08	1.90329e+08	186859589	8.19526e+08	2.06134e+08	1.56496e+08	2.59828e+08	1.62366e+08	1.56233e+08	1.687e+08	1.49256e+08	1.9233e+08	1.53093e+08	1.97721e+08	2.57056e+08	3.03592e+08	2.21312e+08	1.80565e+08	2.30739e+08	2.47042e+08	2.02995e+08	195126906	2.63943e+08	1.64582e+08	2.79455e+08	3.26932e+08	3.94138e+08	3.62494e+08	3.25769e+08	1.10877
P47911	60S ribosomal protein L6 OS=Mus musculus OX=10090 GN=Rpl6 PE=1 SV=3 - [RL6_MOUSE]	96.62	1	12	59	658	3.6972e+08	3.31464e+08	2.14663e+08	311583650	2.04292e+08	4.00209e+08	3.48953e+08	2.41634e+08	2.3817e+08	1.7632e+08	3.35911e+08	3.68804e+08	2.34386e+08	3.62572e+08	3.13249e+08	2.23572e+08	2.22636e+08	2.73935e+08	3.18143e+08	3.77661e+08	1.37736e+08	2.7346e+08	2.39814e+08	2.83373e+08	176141762	3.02109e+08	4.0145e+08	2.84667e+08	3.04678e+08	2.42175e+08	1.36129e+08	2.37936e+08	2.83749e+08	4.47851e+08	443232198	4.84064e+08	3.09142e+08	369605107	2.86345e+08	2.81057e+08	3.22984e+08	2.83189e+08	1.12796
P14131	40S ribosomal protein S16 OS=Mus musculus OX=10090 GN=Rps16 PE=1 SV=4 - [RS16_MOUSE]	96.58	1	9	27	214	5.32801e+08	3.5955e+08	3.30994e+08	4.53653e+08	1.39169e+08	2.38922e+08	5.24148e+08	3.70911e+08	1.99799e+08	1.11896e+08	2.24799e+08	6.50904e+08	1.8804e+08	2.10902e+08	2.01442e+08	4.74677e+08	3.98853e+08	2.52282e+08	301099769	4.48594e+08	1.43277e+08	2.25481e+08	4.39304e+08	2.00367e+08	139150664	2.86495e+08	3.79659e+08	1.71588e+08	1.13684e+08	3.84313e+08	4.56639e+08	1.76255e+08	5.43267e+08	2.37565e+08	211722859	2.85376e+08	1.4723e+08	269344793	3.63233e+08	2.89135e+08	2.95217e+08	3.75101e+08	0.812748
Q8K3A0	Iron-sulfur cluster co-chaperone protein HscB OS=Mus musculus OX=10090 GN=Hscb PE=1 SV=2 - [HSC20_MOUSE]	96.58	1	1	26	51	1.15049e+08	6.23793e+06	0	0	0	5.3939e+08	2.15652e+08	0	0	2.45066e+08	2.88974e+09	2.01359e+08	0	0	138754862	6.68525e+08	2784257245	8965770093	3.76813e+06	0	8.90559e+08	619748321	0	0	2.14616e+08	0	4.29778e+09	0	5.7884e+08	7.10655e+06	0	5.93506e+08	0	5.68393e+07	0	0	2.50863e+07	3.77236e+08	2.42574e+07	2.00021e+08	6.4597e+08	2.48446e+09	26.6298
Q60854	Serpin B6 OS=Mus musculus OX=10090 GN=Serpinb6 PE=1 SV=1 - [SPB6_MOUSE]	96.56	1	14	51	425	6.39207e+08	1.25489e+08	1.41354e+08	1.52469e+09	1120234512	2.20358e+09	1.87361e+08	1.37771e+08	7.04415e+08	1.37888e+09	3.10303e+08	205557352	1.04437e+08	1.24389e+08	8.97002e+07	2.45274e+08	1.3834e+08	9.68177e+07	1.13719e+08	1.28455e+08	1.14621e+08	8.7243e+07	9.97549e+07	1.58442e+08	1.40392e+08	1.75315e+08	1.89461e+08	1.59785e+08	1.52838e+08	1.41341e+08	9.48306e+07	1.49554e+09	1.48924e+08	2.00509e+08	1.60914e+08	250128894	1.55712e+08	1.71345e+08	7.10194e+08	9.22401e+08	1.66877e+08	1.44521e+08	0.234974
Q9D2M8	Ubiquitin-conjugating enzyme E2 variant 2 OS=Mus musculus OX=10090 GN=Ube2v2 PE=1 SV=4 - [UB2V2_MOUSE]	96.55	1	4	26	415	1.74742e+09	9.86329e+08	3.09148e+09	1.11822e+09	7.79891e+08	1.71322e+09	1.54845e+09	2650606723	6.43734e+09	7.59487e+08	1.45815e+09	4.68224e+09	3.74455e+09	5.81562e+09	4.63816e+09	3.13012e+09	2.91019e+09	9.88403e+08	4978243382	1.56504e+09	1.16403e+09	3.74793e+09	2.66422e+09	3.55559e+09	3.95261e+09	2.46474e+09	5.73578e+09	3.73144e+09	4.12539e+09	3.74063e+09	2.4176e+09	8.76186e+08	3127022633	2.9414e+09	2.31502e+09	4.27104e+09	4.45938e+09	3.50119e+09	1.54467e+09	2.62182e+09	4.06774e+09	2.7144e+09	2.63341
P42125	Enoyl-CoA delta isomerase 1, mitochondrial OS=Mus musculus OX=10090 GN=Eci1 PE=1 SV=2 - [ECI1_MOUSE]	96.54	1	9	40	208	120547430	7.35407e+07	6.17256e+07	8.01964e+07	4.62906e+07	146532776	1.13334e+08	1.18149e+08	7.84088e+07	5.94524e+07	1.74007e+08	163347688	4.85025e+07	137897156	1.96868e+08	4.83089e+07	7.03257e+07	6.65607e+07	1.72874e+08	1.05989e+08	5.06889e+07	1.34017e+08	5.96123e+07	6.64652e+08	2.02704e+08	1.91434e+08	1.48991e+08	1.85058e+08	125007637	2.24385e+08	2.35965e+08	9.06335e+07	6.92808e+07	591979738	1.8357e+08	170945433	1.04615e+08	2.13493e+08	7.64601e+07	1.03175e+08	1.44125e+08	9.28118e+07	1.88496
P46471	26S proteasome regulatory subunit 7 OS=Mus musculus OX=10090 GN=Psmc2 PE=1 SV=5 - [PRS7_MOUSE]	96.54	1	24	74	747	3.13075e+08	1.27436e+08	1.61103e+08	194107125	1.34509e+08	1014775273	1.05807e+09	160139802	2.51426e+08	1.61611e+08	8.2433e+08	2.55215e+08	1.81914e+08	2.43483e+08	1.4555e+08	7.63865e+08	1.52087e+08	173916121	2.27638e+08	2.18517e+08	7.30312e+08	1.737e+08	2.26979e+08	1.90085e+08	1.52583e+09	2.00043e+08	3.31964e+08	2.07537e+08	2.12431e+08	8.19601e+08	173819936	2.00504e+08	3.27608e+08	1.04504e+09	2.15308e+08	3.81243e+08	2.59419e+08	2.68685e+08	1.86046e+08	5.29205e+08	3.30098e+08	3.07204e+08	1.77428
P03995	Glial fibrillary acidic protein OS=Mus musculus OX=10090 GN=Gfap PE=1 SV=4 - [GFAP_MOUSE]	96.51	1	18	73	436	2.29029e+08	8.48739e+07	1.46914e+08	1.7451e+08	6.0053e+08	1.40482e+08	2.23253e+08	1.26321e+08	1.30393e+08	1.19527e+08	123040105	1.6817e+08	6.95494e+07	1.82287e+08	9.07794e+08	6.9736e+07	1.13498e+08	101596025	1.32453e+08	9.62585e+08	1.79584e+08	7.73418e+07	1.1155e+08	172617797	9.7619e+07	5.81416e+08	1.74359e+08	2.51907e+08	1.65792e+08	1.08461e+08	6.96341e+07	1.14337e+08	970066383	5.65952e+08	7.39251e+07	2.60264e+08	2.02167e+08	2.18968e+08	2.47171e+08	1.47995e+08	2.90168e+08	2.75974e+08	1.17396
P27661	Histone H2AX OS=Mus musculus OX=10090 GN=H2ax PE=1 SV=2 - [H2AX_MOUSE]	96.5	1	2	25	274	6.74756e+09	3.44931e+09	4.80964e+09	3849223844	2.33841e+09	5.9869e+09	4505487083	2.65793e+09	2.96379e+09	3.24089e+09	3781510742	5.0199e+09	2.65803e+09	4.23093e+09	3.92315e+09	4.7824e+09	2.68844e+09	4.58667e+09	4.27915e+09	4.79838e+09	2.39936e+09	2.7326e+09	4.75666e+09	2.36109e+09	3562515031	4378422428	3523980112	3.52778e+09	4.65675e+09	4092921988	2.65307e+09	3.09122e+09	3.67214e+09	6.53434e+09	5.1132e+09	6.29258e+09	3.98891e+09	3.08917e+09	4.23883e+09	3.871e+09	3.9227e+09	4.22701e+09	0.925422
Q9CQI3	Glia maturation factor beta OS=Mus musculus OX=10090 GN=Gmfb PE=1 SV=3 - [GMFB_MOUSE]	96.48	2	8	17	226	9.82135e+08	6.79489e+08	2.61409e+08	8.37446e+08	6.31438e+08	1.00938e+09	9.94069e+08	1030114656	2.52023e+08	4.70619e+08	8.51892e+08	4.58804e+08	8.15222e+08	1170506599	8.94723e+08	3.46741e+08	8.04458e+08	7.38549e+08	8.91694e+08	1.14113e+09	7.1634e+08	7.83679e+08	7.53325e+08	8.18658e+08	4.46109e+08	8.93376e+08	1.26431e+09	9.28055e+08	5.56548e+08	894118113	2.97734e+08	772447216	1.03958e+09	1.09732e+09	7.90003e+08	1409955845	1.07853e+09	1.25648e+09	6.78383e+08	7.5124e+08	8.38229e+08	7.84515e+08	1.23563
O08599	Syntaxin-binding protein 1 OS=Mus musculus OX=10090 GN=Stxbp1 PE=1 SV=2 - [STXB1_MOUSE]	96.46	1	58	107	3712	4.33178e+09	2.0313e+09	3.53923e+09	4.13722e+09	2.65613e+09	3.55167e+09	4.43368e+09	2.87622e+09	3.68247e+09	2.55157e+09	3.41703e+09	3.38368e+09	4.27375e+09	5680816065	5058939573	3.23591e+09	2.65889e+09	3.5677e+09	4.7366e+09	5298754791	3.60816e+09	3.55994e+09	3069421576	3.65032e+09	3.13212e+09	2.45061e+09	4.00551e+09	3.8916e+09	4.08465e+09	3.28486e+09	3.21166e+09	4.06154e+09	5541851651	3.62941e+09	3070051676	4694763313	5.09275e+09	4355033857	3.33913e+09	3.41912e+09	4.36284e+09	3.89957e+09	1.30658
Q9D0B6	Protein PBDC1 OS=Mus musculus OX=10090 GN=Pbdc1 PE=1 SV=1 - [PBDC1_MOUSE]	96.46	1	6	25	148	6.99733e+07	2.56617e+08	1.61462e+08	3.9751e+07	1.80059e+08	5.9227e+07	73189609	68968105	42536078	1.55266e+08	59560848	7.15357e+07	5.11876e+07	78766346	3.34327e+07	3.87621e+07	3.38349e+07	1.77231e+08	82442126	81420559	1.29628e+08	2.38392e+08	3.09743e+07	8.45713e+07	8.54332e+07	62820560	71736733	3.34455e+07	72873776	5.7741e+07	5.08819e+07	59625632	69825805	9.02407e+07	7.02946e+07	151559576	1.69678e+08	8.69558e+07	1.41572e+08	7.98374e+07	5.88966e+07	8.27381e+07	0.416018
Q9QXY6	EH domain-containing protein 3 OS=Mus musculus OX=10090 GN=Ehd3 PE=1 SV=2 - [EHD3_MOUSE]	96.45	1	18	67	1013	5.88376e+08	3.20469e+08	2.94481e+08	3.53679e+08	2.6018e+08	4.40347e+08	5.23872e+08	3.91848e+08	3.57822e+08	2.30621e+08	4.79826e+08	5.30674e+08	3.24782e+08	462823126	3.6475e+08	4.00497e+08	324168706	3.33673e+08	4.31182e+08	4.69112e+08	3.25723e+08	3.14455e+08	3.21257e+08	3.41872e+08	4.52977e+08	3.86455e+08	5.30115e+08	446707425	4.21752e+08	4.06532e+08	2.9263e+08	355513283	4.13661e+08	5.76677e+08	3.84993e+08	6.70716e+08	4.2232e+08	4.82316e+08	3.63437e+08	3.88902e+08	4.32571e+08	3.91727e+08	1.19022
Q9QYB1	Chloride intracellular channel protein 4 OS=Mus musculus OX=10090 GN=Clic4 PE=1 SV=3 - [CLIC4_MOUSE]	96.44	2	8	30	191	1.18416e+08	4.08069e+07	5.29332e+07	5.43079e+07	4.48355e+07	1.55465e+08	1.13682e+08	3.82989e+07	5.65134e+07	8.89164e+07	7.88358e+07	5.84943e+07	5.48785e+07	6.27415e+07	6.80913e+07	6.06124e+07	3.80911e+07	1.00401e+08	4.72143e+07	1.1306e+08	60790035	4.44454e+07	65568651	60925693	8.80517e+07	7.19166e+07	4.81849e+07	8.64993e+07	1.00907e+08	8.18609e+07	4.47657e+07	9.04101e+07	1.29396e+08	8.38482e+07	9.34497e+07	4.90189e+07	7.78772e+07	6.60403e+07	6.22598e+07	9.05752e+07	6.46083e+07	7.18759e+07	1.03772
Q9D7P6	Iron-sulfur cluster assembly enzyme ISCU, mitochondrial OS=Mus musculus OX=10090 GN=Iscu PE=1 SV=1 - [ISCU_MOUSE]	96.43	1	4	26	147	8.05314e+08	4.07772e+08	484047058	1.1038e+09	417698654	5.86928e+08	9.23148e+08	4.85826e+08	4.29952e+08	1109185676	6.50749e+08	8.55442e+08	3.85582e+08	1511259663	1058406595	5.08162e+08	4.41862e+08	1014972206	5.361e+08	1.17368e+09	4.48542e+08	4.95635e+08	473903379	5.69688e+08	598131168	6.21823e+08	6.89502e+08	5.62372e+08	4.55442e+08	575414786	1.15289e+09	5.68346e+08	780678724	4.77047e+08	4.82142e+08	7.01712e+08	8.30814e+08	8.66326e+08	6.43727e+08	7.07008e+08	8.92288e+08	7.34956e+08	1.38613
Q9CXS4	Centromere protein V OS=Mus musculus OX=10090 GN=Cenpv PE=1 SV=2 - [CENPV_MOUSE]	96.43	1	8	35	276	6.5223e+07	7.36753e+07	1.09991e+08	99231994	7.38234e+07	1.24279e+08	1.41643e+08	1.71148e+08	9.93199e+07	7.4214e+07	1.42154e+08	1.04455e+08	7.65343e+07	1.27186e+08	1.6378e+08	8.79184e+07	1.45403e+08	1.15262e+08	1.05647e+08	1.32678e+08	8.62603e+07	9.81054e+07	1.21403e+08	1.08347e+08	1.08246e+08	1.17058e+08	2.03192e+08	9.4782e+07	1.2706e+08	1.08095e+08	8.40151e+07	1.02998e+08	1.12017e+08	1.64472e+08	1.06859e+08	3.03624e+08	1.56225e+08	1.34339e+08	8.4389e+07	1.22121e+08	1.22822e+08	1.17382e+08	1.45542
Q62393	Tumor protein D52 OS=Mus musculus OX=10090 GN=Tpd52 PE=1 SV=2 - [TPD52_MOUSE]	96.43	1	10	20	284	1.32194e+09	1.54553e+08	1.74571e+08	1.75758e+08	1.25918e+08	2.30033e+08	2.28152e+08	2.26078e+08	1.44285e+08	1.23944e+08	1.7729e+08	2.68022e+08	1.42999e+08	1.93562e+08	142110687	1.56213e+08	1.74125e+08	1.57798e+08	1.04096e+08	1.98903e+08	1.62025e+08	1.84606e+08	1.91876e+08	1.13444e+08	1.56902e+08	200681155	2.38272e+08	1.84068e+08	2.2684e+08	1.59869e+08	1.65357e+08	2.23691e+08	2.14507e+08	3.24512e+08	1.85028e+08	3.7452e+08	1.27195e+08	1.99586e+08	3.90549e+08	1.90498e+08	1.84797e+08	1.58227e+08	0.473172
Q9CQP2	Trafficking protein particle complex subunit 2 OS=Mus musculus OX=10090 GN=Trappc2 PE=1 SV=1 - [TPPC2_MOUSE]	96.43	1	3	14	96	91964988	7.28036e+07	1.09551e+08	1.0243e+08	1.75889e+08	7.74349e+07	1.62692e+08	238647903	2.14184e+08	3.32827e+07	1.02054e+08	33477967	255003748	9.81549e+07	3.00661e+07	5.00236e+07	8.64109e+07	1.44084e+08	61861304	2.70281e+07	32118280	0	1.57293e+08	126666971	5.23448e+07	1.41704e+08	7.55955e+07	5.82714e+07	1.70152e+08	0	2.10204e+08	4.96269e+07	1.20734e+08	0	2.11518e+08	59909098	2.23351e+07	5.52746e+07	1.10528e+08	1.45248e+08	1.03751e+08	7.38815e+07	0.938693
Q6ZWN5	40S ribosomal protein S9 OS=Mus musculus OX=10090 GN=Rps9 PE=1 SV=3 - [RS9_MOUSE]	96.39	1	15	41	378	5.27019e+08	2.0346e+08	2.39114e+08	282696483	1.30079e+08	2.83184e+08	3.54052e+08	2.62573e+08	2.91965e+08	1.87155e+08	4.45752e+08	3.72151e+08	2.71545e+08	4.6324e+08	3.47793e+08	219723592	2.98147e+08	2.85656e+08	2.94818e+08	3.87331e+08	3.25668e+08	3.14522e+08	2.19301e+08	3.01342e+08	2.182e+08	2.65553e+08	4.46762e+08	2.89244e+08	2.87543e+08	2.75219e+08	2.54937e+08	2.74986e+08	2.65402e+08	3.21181e+08	2.80044e+08	4.13911e+08	3.38057e+08	4.21057e+08	2.76474e+08	2.75786e+08	3.80096e+08	2.97135e+08	1.3748
Q05512	Serine/threonine-protein kinase MARK2 OS=Mus musculus OX=10090 GN=Mark2 PE=1 SV=3 - [MARK2_MOUSE]	96.39	2	2	99	423	2.83383e+08	7.40893e+08	1.76261e+08	1.57939e+08	7.41041e+08	1.3974e+08	9.88762e+08	5.39593e+07	9.32003e+07	9.95989e+07	3.89732e+08	874370971	6.11248e+07	8.01553e+08	2.93951e+08	8.76989e+07	116097520	1.76577e+08	1.29039e+08	2.21057e+08	5.78593e+08	5.79226e+08	2.01717e+08	7.61724e+07	6.97653e+08	7.1258e+08	1.31807e+08	6.95132e+08	1.59567e+09	6.35231e+08	7.31846e+08	1.36027e+08	1.75834e+09	6.63268e+08	6.18988e+08	1.78928e+08	1.76576e+08	1.51726e+08	4.19903e+08	2.75052e+08	4.84146e+08	1.46094e+08	1.153
P32848	Parvalbumin alpha OS=Mus musculus OX=10090 GN=Pvalb PE=1 SV=3 - [PRVA_MOUSE]	96.36	1	10	21	217	4.07504e+08	2.59209e+08	1.40328e+08	2.55224e+08	199342549	1.758e+08	407109848	2.63931e+08	1.725e+08	6.33449e+07	1.35214e+08	4.44315e+08	1.93972e+08	3.01292e+08	3.03996e+08	2.4635e+08	1.99146e+08	2.24463e+08	2.83587e+08	193751450	1.76862e+08	1.95305e+08	1.48012e+08	3.67611e+08	1.98367e+08	2.1356e+08	507462798	2.33807e+08	3.07962e+08	1.1184e+08	1.73665e+08	2.99737e+08	2.90259e+08	1.29317e+08	274733681	5.41772e+08	2.93015e+08	3.36103e+08	2.52322e+08	2.16537e+08	2.75758e+08	2.2946e+08	1.09288
Q9R020	Zinc finger Ran-binding domain-containing protein 2 OS=Mus musculus OX=10090 GN=Zranb2 PE=1 SV=2 - [ZRAB2_MOUSE]	96.36	1	3	68	306	2.63131e+08	1.52302e+08	3.14554e+08	3.56477e+08	3.90056e+08	1.25441e+09	4.60302e+08	5.68564e+08	3.43076e+08	147896951	5.75072e+08	934085935	2.11492e+08	2.07045e+08	1.61058e+08	423725845	2.21682e+08	6.16245e+08	2.37612e+08	2.52871e+08	2.09758e+08	1.68371e+08	1.92242e+08	4.04912e+08	3.13981e+08	7.36558e+08	2.87782e+08	5.57161e+07	7.60977e+08	5.29402e+08	1.63774e+08	1.90233e+08	4.2901e+07	2.7282e+08	2.51273e+08	9.57943e+08	1.04842e+09	6.41388e+08	2.95304e+08	5.5485e+08	4.17751e+08	3.50427e+08	1.41465
Q8BGZ1	Hippocalcin-like protein 4 OS=Mus musculus OX=10090 GN=Hpcal4 PE=1 SV=3 - [HPCL4_MOUSE]	96.34	1	12	31	765	7.46782e+08	4.86555e+08	1.79227e+09	8.47101e+08	7.06882e+08	5.85841e+08	1.3664e+09	5.47674e+08	1.00964e+09	4.42796e+08	8.59908e+08	1.00128e+09	9.71768e+08	1.80983e+09	1.81798e+09	5.11217e+08	5.19277e+08	7.66194e+08	1.05623e+09	1.36899e+09	5.01499e+08	7.10326e+08	7.42986e+08	1.18109e+09	6.86249e+08	7.57183e+08	1.07367e+09	1.26866e+09	1.43742e+09	5.898e+08	826803859	1.10671e+09	1.36876e+09	1.50331e+09	7.35883e+08	1.88311e+09	1.11386e+09	2130755039	9.15917e+08	7.90471e+08	1.29215e+09	8.44381e+08	1.41078
P84091	AP-2 complex subunit mu OS=Mus musculus OX=10090 GN=Ap2m1 PE=1 SV=1 - [AP2M1_MOUSE]	96.32	1	28	71	1118	1233723275	7.63109e+08	6.80902e+08	7.96563e+08	6.39764e+08	1.22263e+09	1.09245e+09	7.01706e+08	7.3782e+08	5.08201e+08	8.09749e+08	1.18913e+09	7.87933e+08	877261529	7.43856e+08	9.79303e+08	7.04648e+08	665931784	9.17308e+08	1.23065e+09	8.00766e+08	7.56414e+08	6.43976e+08	9.49095e+08	7.315e+08	8.98155e+08	8.93095e+08	9.76088e+08	1.02771e+09	9.78598e+08	8.85663e+08	8.93292e+08	9.93054e+08	1.19659e+09	1.00045e+09	1.72377e+09	9.16893e+08	9.54741e+08	8.22812e+08	8.52561e+08	8.81586e+08	8.99568e+08	1.07143
Q64288	Olfactory marker protein OS=Mus musculus OX=10090 GN=Omp PE=1 SV=3 - [OMP_MOUSE]	96.32	1	7	20	173	2.08282e+08	1.57594e+08	5.18548e+08	9.47053e+06	0	9.92626e+07	0	9.96615e+07	4.10672e+06	5.84921e+08	45591101	0	0	0	1.53922e+06	0	4.09822e+07	3.66101e+08	8.72082e+07	360380018	0	0	7.87459e+08	0	76600040	6.13739e+07	0	0	3.80885e+08	4.64099e+07	0	0	162200948	3.94865e+08	2.164e+08	1.76046e+08	2.25126e+08	1.8703e+06	1.78779e+08	1.5759e+08	9.42606e+06	1.70934e+08	0.0527247
Q9WTX5	S-phase kinase-associated protein 1 OS=Mus musculus OX=10090 GN=Skp1 PE=1 SV=3 - [SKP1_MOUSE]	96.32	1	11	24	448	5.60943e+08	404487365	3.62342e+08	464802937	364977513	5.68759e+08	5.50766e+08	5.09014e+08	5.02631e+08	2.74192e+08	486236330	5.89785e+08	4.91342e+08	6.56506e+08	4.40658e+08	4.19506e+08	4.21094e+08	3.68404e+08	543197107	7.01505e+08	4.13081e+08	4.20565e+08	4.08121e+08	5.70363e+08	4.24042e+08	509274625	7.19114e+08	5.79251e+08	609182761	485908955	3.66724e+08	5.13829e+08	5.73652e+08	6.38069e+08	455977045	1.00191e+09	5.15952e+08	7.12037e+08	4.31511e+08	4.81072e+08	5.32905e+08	4.90741e+08	1.23498
P80313	T-complex protein 1 subunit eta OS=Mus musculus OX=10090 GN=Cct7 PE=1 SV=1 - [TCPH_MOUSE]	96.32	1	30	81	1285	7.75779e+08	3.2188e+08	2.12046e+08	7.1333e+08	4.4573e+08	5.70756e+08	8.18295e+08	2.79015e+08	3.39443e+08	4.05163e+08	4.42503e+08	1.08223e+09	3.22035e+08	4.87106e+08	3.46202e+08	3.10436e+08	7.23239e+08	5.84712e+08	4.31614e+08	6.4501e+08	345647655	2.89749e+08	5.9959e+08	3.82822e+08	3.32452e+08	8.56608e+08	1.0843e+09	3.22058e+08	1.4035e+09	3.61013e+08	2.57035e+08	6.54736e+08	8.06116e+08	1.23148e+09	617503845	5.72856e+08	8.53138e+08	1.03708e+09	4.93753e+08	4.82534e+08	5.36015e+08	5.39002e+08	1.08559
P63158	High mobility group protein B1 OS=Mus musculus OX=10090 GN=Hmgb1 PE=1 SV=2 - [HMGB1_MOUSE]	96.28	2	13	42	542	7.25838e+08	228170946	5.15114e+08	4.80284e+08	3.33385e+08	4.4107e+08	6.10078e+08	2.85461e+08	4.62026e+08	636650470	7.57458e+08	4.02707e+08	4.54334e+08	7.13398e+08	5.34787e+08	4.18963e+08	2.86889e+08	5.74427e+08	6.56443e+08	9.86799e+08	4.63474e+08	4.99645e+08	6.58965e+08	2.73641e+08	5.08103e+08	3.39034e+08	3.43559e+08	5.02621e+08	8.51658e+08	6.4735e+08	4.27074e+08	5.38186e+08	7.47738e+08	2.84933e+08	4.78733e+08	5.54446e+08	4.8461e+08	3.97206e+08	4.56558e+08	4.87057e+08	5.72537e+08	5.84704e+08	1.25403
P16546	Spectrin alpha chain, non-erythrocytic 1 OS=Mus musculus OX=10090 GN=Sptan1 PE=1 SV=4 - [SPTN1_MOUSE]	96.28	5	203	409	8448	1749763139	1.15451e+09	1.38134e+09	2.0257e+09	1.31544e+09	1.6503e+09	1.79357e+09	1.78188e+09	1.62269e+09	1.12197e+09	2.28523e+09	2211036970	1.67152e+09	2.59959e+09	2.11517e+09	1102264627	1475593255	1.45567e+09	1.937e+09	2.49754e+09	1.42678e+09	1.58335e+09	1.42832e+09	1.43349e+09	1.42152e+09	1713188607	1.93557e+09	2202890182	1.99553e+09	1.52282e+09	1.49698e+09	1.86937e+09	2.27963e+09	2.34355e+09	1.21436e+09	3.12031e+09	2.1968e+09	2.05278e+09	1.52535e+09	1.59408e+09	2.17651e+09	1.69361e+09	1.42689
P49312	Heterogeneous nuclear ribonucleoprotein A1 OS=Mus musculus OX=10090 GN=Hnrnpa1 PE=1 SV=2 - [ROA1_MOUSE]	96.25	1	15	53	1015	1.23528e+09	893378868	6.40807e+08	8.01138e+08	4.67258e+08	1.14237e+09	1.03864e+09	8.19596e+08	6.84921e+08	5.28601e+08	1.01435e+09	1.22433e+09	3.73893e+09	9.77381e+08	9.26388e+08	8.92682e+08	8.26562e+08	809088051	7.70742e+08	1.0597e+09	7.02259e+08	776477083	7.56753e+08	7.58648e+08	9.11778e+08	1.08663e+09	1.13277e+09	7.00781e+08	1.04023e+09	1.04375e+09	5.5729e+08	7.37736e+08	8.56952e+08	1.18664e+09	9.20951e+08	1.39766e+09	8.76362e+08	1.05145e+09	8.07572e+08	8.42827e+08	1.57628e+09	8.71754e+08	1.95187
Q62421	Endophilin-A3 OS=Mus musculus OX=10090 GN=Sh3gl3 PE=1 SV=1 - [SH3G3_MOUSE]	96.25	1	14	49	424	116223393	1.30313e+08	5.08244e+07	5.52926e+07	4.18485e+07	1.96561e+08	9.58592e+07	85145888	5.49993e+07	4.05503e+07	7.5284e+07	1.89669e+08	5.07031e+07	7.07959e+07	9.13663e+07	7.56214e+07	8.68172e+07	1.18671e+08	7.71105e+07	6.9926e+07	7.21882e+07	8.7753e+07	4.68218e+07	8.37684e+07	7.53482e+07	1.03701e+08	8.93073e+07	104792175	6.23376e+07	8.69887e+07	82663526	6.71016e+07	9.90587e+07	1.23049e+08	8.16976e+07	1.71189e+08	7.52152e+07	1.28623e+08	7.89005e+07	9.46231e+07	9.55636e+07	8.56292e+07	1.21119
P51859	Hepatoma-derived growth factor OS=Mus musculus OX=10090 GN=Hdgf PE=1 SV=2 - [HDGF_MOUSE]	96.2	1	10	30	324	2.11797e+08	1.74026e+08	1.84771e+08	174718100	1.37636e+08	2.8128e+08	3.04074e+08	1.66043e+08	1.91829e+08	1.84409e+08	2.16833e+08	2.72337e+08	1.73729e+09	2.83978e+08	2.23563e+08	1.9841e+08	2.11086e+08	199105264	235372671	3.40033e+08	1.60877e+08	1.76452e+08	1.87322e+08	1.78721e+08	1.8669e+08	2.09382e+08	2.6871e+08	2.15087e+08	2.64711e+08	2.26501e+08	1.55076e+08	2.2007e+08	2.38267e+08	1.99361e+08	3.02128e+08	3.75139e+08	3.10003e+08	2.80205e+08	1.7659e+08	2.25527e+08	5.46799e+08	2.36801e+08	3.09644
Q9CPR4	60S ribosomal protein L17 OS=Mus musculus OX=10090 GN=Rpl17 PE=1 SV=3 - [RL17_MOUSE]	96.2	1	6	26	249	4.20137e+08	6.2357e+08	151051357	3.66958e+08	1.18568e+08	746966368	1.89295e+08	1.78573e+08	4.29393e+08	2.68448e+08	1.23704e+08	6.20644e+08	3.97336e+08	2.76793e+08	1.58593e+08	1.30181e+08	1.84258e+08	1.67e+08	5.94917e+08	2.40201e+08	1.6862e+08	1.74512e+08	2.95164e+08	1.79193e+08	1.61649e+08	5.50355e+08	2.62745e+08	3.40826e+08	2.09526e+08	1.74189e+08	3.61362e+08	2.81296e+08	4.60834e+08	2.25207e+08	3.44604e+08	5.34467e+08	4.67244e+08	258964615	3.36057e+08	3.62535e+08	3.15414e+08	2.63311e+08	0.938574
P62897	Cytochrome c, somatic OS=Mus musculus OX=10090 GN=Cycs PE=1 SV=2 - [CYC_MOUSE]	96.19	1	11	25	989	5.96261e+09	2.56271e+09	3.89945e+09	4.76538e+09	3.39887e+09	4620006370	5.27594e+09	3.89243e+09	4959865784	2.79803e+09	4754019196	4.96599e+09	4.17948e+09	5820539303	4.78637e+09	4.64647e+09	3.52157e+09	4.52469e+09	5.26051e+09	5.38729e+09	4.2957e+09	4.37188e+09	3.76357e+09	4.17498e+09	4.42147e+09	3.24993e+09	5.49788e+09	4.80525e+09	5.46297e+09	4.26206e+09	4.25014e+09	5.2978e+09	5.041e+09	4314846895	3.93796e+09	5.60226e+09	5.71315e+09	4823613104	4.1178e+09	4.30926e+09	4.90128e+09	4.66811e+09	1.19027
P21126	Ubiquitin-like protein 4A OS=Mus musculus OX=10090 GN=Ubl4a PE=1 SV=1 - [UBL4A_MOUSE]	96.18	1	9	24	129	1.46742e+08	4.64129e+07	3.35747e+07	1.97081e+07	1.7038e+07	1.59008e+08	9.9046e+07	1.74317e+07	4.37642e+07	1.91219e+07	1.25608e+08	1.44426e+08	3.81572e+07	1.87099e+08	5.50809e+07	3.60497e+07	1.54621e+07	0	0	175847487	7.74635e+07	5.395e+07	4.32456e+07	202978923	6.25465e+07	1.29145e+08	5.38531e+07	3.73566e+07	1.84938e+08	2.09987e+07	2.74329e+07	3.84175e+07	4.453e+07	2.80733e+07	3.99567e+07	8.7272e+07	39363329	1.17692e+08	5.26951e+07	6.76743e+07	1.10074e+08	4.54718e+07	2.08889
Q9JKR6	Hypoxia up-regulated protein 1 OS=Mus musculus OX=10090 GN=Hyou1 PE=1 SV=1 - [HYOU1_MOUSE]	96.1	1	27	115	1034	666069297	1.05151e+09	4.53019e+08	7.54886e+08	5.38515e+08	1.06516e+09	1.09177e+09	9.23001e+08	6.65614e+08	3.23447e+08	7.51932e+08	1.07055e+09	358142915	1.08289e+09	627542654	1.04266e+09	1.06009e+09	4.91671e+08	5.31577e+08	8.0031e+08	8.91152e+08	7.9574e+08	3.17596e+08	7.82565e+08	9.4135e+08	7.8379e+08	8.86735e+08	4.18392e+08	8.14391e+08	8.03743e+08	717482599	7.92646e+08	6.79841e+08	1.26558e+09	4.37684e+08	1.61893e+09	9.26398e+08	7.74309e+08	6.92801e+08	8.13799e+08	7.78212e+08	7.85261e+08	1.12328
O08583	THO complex subunit 4 OS=Mus musculus OX=10090 GN=Alyref PE=1 SV=3 - [THOC4_MOUSE]	96.08	2	6	39	259	1.71736e+08	2.65066e+08	3.25937e+08	1.62071e+08	9.54571e+07	2.06448e+08	2.27189e+08	2.74536e+08	1.41775e+08	1.23095e+08	2.18911e+08	2.08119e+08	132527494	1.90281e+08	1.27259e+08	1.21768e+08	1.40439e+08	1.60656e+08	1.77152e+08	2.27792e+08	1.05654e+08	1.53415e+08	1.55584e+08	97046119	138589030	2.00556e+08	164504023	1.43605e+08	2.10831e+08	2.36299e+08	1.2287e+08	4.5907e+08	1.56394e+08	2.09017e+08	1.40094e+08	4.43301e+08	1.64006e+08	1.61714e+08	2.04053e+08	1.94609e+08	1.75419e+08	1.65561e+08	0.859674
Q03958	Prefoldin subunit 6 OS=Mus musculus OX=10090 GN=Pfdn6 PE=1 SV=1 - [PFD6_MOUSE]	96.06	1	6	17	171	1.82112e+08	9.30003e+07	7.93165e+07	1.71795e+08	7.10555e+07	1.72883e+08	1.49151e+08	1.21301e+08	9.49363e+07	6.30164e+07	1.31418e+08	1.58423e+08	8.36248e+07	1.31758e+08	1.12589e+08	1.1134e+08	1.06242e+08	8.48737e+07	8.75185e+07	1.29942e+08	7.86707e+07	1.01512e+08	1.4864e+08	1.02382e+08	120566888	8.9589e+07	1.51673e+08	1.14762e+08	1.29219e+08	1.28859e+08	9.24506e+07	1.07349e+08	1.15327e+08	1.67722e+08	1.25532e+08	1.95752e+08	1.31262e+08	1.50595e+08	1.19456e+08	1.20257e+08	1.23563e+08	1.03983e+08	1.03438
Q60875	Rho guanine nucleotide exchange factor 2 OS=Mus musculus OX=10090 GN=Arhgef2 PE=1 SV=4 - [ARHG2_MOUSE]	96.04	1	31	131	791	3.9954e+09	1.77001e+08	1.58983e+08	1.68877e+08	1.21288e+08	4.04945e+08	8.25208e+08	3.3778e+08	2.25665e+08	340495825	4.72253e+08	3.16122e+08	3.34039e+08	5.19546e+08	2.54848e+08	4.05827e+08	1.15443e+08	3.4796e+08	1.54855e+08	293802370	1.7669e+08	297207841	1.82407e+08	3.00307e+08	2.08571e+08	2.85933e+08	3.10035e+08	165585160	2.27559e+08	2.37024e+08	340674634	2.2797e+08	295508412	2.85143e+08	1.83857e+09	3.93041e+08	2.64961e+08	3.05762e+08	9.2431e+08	4.26819e+08	3.79362e+08	2.63577e+08	0.410427
O88342	WD repeat-containing protein 1 OS=Mus musculus OX=10090 GN=Wdr1 PE=1 SV=3 - [WDR1_MOUSE]	96.04	1	37	57	1234	1.23573e+09	7.33956e+08	8.05346e+08	9.66261e+08	6.47473e+08	1.1115e+09	1.10319e+09	8.17071e+08	1.04131e+09	619804578	1.00038e+09	1.21454e+09	8.50358e+08	1.38564e+09	9.19958e+08	7.93322e+08	7.98184e+08	7.79431e+08	1.07366e+09	1.18786e+09	889586865	1.0414e+09	8.42057e+08	7.87342e+08	8.70405e+08	8.45727e+08	1.22714e+09	1.0091e+09	1.00341e+09	9.303e+08	824157416	1015915261	1.2415e+09	1.18075e+09	8.4772e+08	1.40329e+09	1.13521e+09	1057614011	8.77753e+08	9.38573e+08	1.07417e+09	9.26492e+08	1.22378
Q9QXX3	Group 10 secretory phospholipase A2 OS=Mus musculus OX=10090 GN=Pla2g10 PE=1 SV=1 - [PA2GX_MOUSE]	96.03	1	1	12	41	0	227467873	1.58146e+08	0	1.03559e+07	0	272885946	0	1.5057e+08	6.55575e+07	2.28269e+08	0	0	129154139	178935143	0	0	1.7121e+08	1.79939e+08	1.6627e+07	3.50416e+08	269788544	0	184594754	0	2.6898e+08	271108336	232614183	248707362	0	0	1.22572e+07	118577584	0	0	0	1.44672e+08	1.30866e+07	7.91939e+07	9.78026e+07	1.07272e+08	7.3555e+07	1.35454
Q99JF8	PC4 and SFRS1-interacting protein OS=Mus musculus OX=10090 GN=Psip1 PE=1 SV=1 - [PSIP1_MOUSE]	96.02	1	12	91	498	3.42251e+08	2.27378e+08	4.19633e+08	4.62018e+08	1.47643e+08	3.93898e+08	3.7081e+08	2.43025e+08	2.12502e+08	290684682	3.867e+08	5.91727e+08	4.20364e+08	2.3174e+08	2.31415e+08	5.61382e+08	3.84773e+08	1.92575e+08	3.60724e+08	3.01687e+08	368400019	4.37195e+08	4.98541e+08	459430999	4.69738e+08	401778448	2.43622e+08	2.52579e+08	5.614e+08	574222250	427468932	3.11907e+08	5.02876e+08	5.50073e+08	5.74995e+08	8.09456e+08	3.23615e+08	3.56718e+08	3.19785e+08	3.02184e+08	3.72389e+08	360227877	1.1645
P40336	Vacuolar protein sorting-associated protein 26A OS=Mus musculus OX=10090 GN=Vps26a PE=1 SV=1 - [VP26A_MOUSE]	96.02	1	11	44	387	2.01276e+08	1.46632e+08	1.34138e+08	1.55991e+08	1.05188e+08	244211642	1068252701	1.8763e+08	1.38006e+08	3.7278e+08	1.52533e+08	1.22256e+09	1.51321e+08	1.425e+08	3.02539e+08	1.72619e+08	1.65893e+08	1.37085e+08	1.29704e+08	1.88899e+08	1.6877e+08	1.71611e+08	7.75867e+08	1.64671e+08	7.82878e+08	7.89452e+08	2.28084e+08	9.94811e+08	1.15652e+09	7.36676e+08	1.45154e+08	1.62697e+08	1.54265e+08	2.40178e+08	5.52425e+08	2.9234e+08	1.72288e+08	1.73055e+08	1.48645e+08	4.02176e+08	3.94291e+08	1.5884e+08	2.65257
P61164	Alpha-centractin OS=Mus musculus OX=10090 GN=Actr1a PE=1 SV=1 - [ACTZ_MOUSE]	96.01	1	5	38	662	8.27956e+08	5.57879e+08	4.18035e+08	5.08883e+08	3.45654e+08	8.74124e+08	7.43881e+08	5.02013e+08	4.66218e+08	3.94042e+08	7.00522e+08	9.2718e+08	4.02113e+08	5.74223e+08	4.34575e+08	5.6062e+08	539441605	4.56628e+08	1.90042e+09	7.18307e+08	4.69732e+08	4.15214e+08	4.65847e+08	4.86166e+08	5.72598e+08	1.57253e+09	6.1955e+08	5.3195e+08	6.36403e+08	5.89237e+08	4.45173e+08	511127546	6.07983e+08	8.58589e+08	6.68389e+08	9.92493e+08	1.56035e+09	612519026	5.31681e+08	5.96056e+08	6.07723e+08	8.35083e+08	1.14302
Q9D1A2	Cytosolic non-specific dipeptidase OS=Mus musculus OX=10090 GN=Cndp2 PE=1 SV=1 - [CNDP2_MOUSE]	96	1	25	60	751	5.54476e+08	2.92573e+08	2.64708e+08	3.44319e+08	2.62818e+08	3.73648e+08	4.84011e+08	3.07036e+08	2.94762e+08	1.77089e+08	3.79137e+08	4.24099e+08	3.81517e+08	394931753	3.10866e+08	2.41851e+08	2.68986e+08	3.38425e+08	3.1812e+08	5.35999e+08	2.77594e+08	2.8228e+08	4.17382e+08	3.09738e+08	3.85704e+08	3.89482e+08	4.80912e+08	5.91583e+08	6.07665e+08	3.16501e+08	3.27921e+08	4.42262e+08	352080189	5.06376e+08	2.92886e+08	5.77406e+08	3.41183e+08	4.7788e+08	3.43779e+08	3.27309e+08	3.7811e+08	3.40676e+08	1.09986
Q9CQ10	Charged multivesicular body protein 3 OS=Mus musculus OX=10090 GN=Chmp3 PE=1 SV=3 - [CHMP3_MOUSE]	95.98	1	2	36	143	2.74117e+08	2.08894e+08	3.38829e+08	0	1.21747e+08	2.34196e+08	2.79269e+08	1.60683e+08	3.6427e+08	2.03302e+08	4.43519e+08	3.27616e+08	6.07959e+08	2.3179e+08	3.31769e+08	2.30014e+08	149973301	3.8755e+08	1.6427e+08	1.31003e+08	1.96514e+08	183513711	3.64734e+08	2.3118e+08	2.52565e+08	2.92761e+08	1.16596e+08	3.86968e+08	9.97101e+07	2.54775e+08	1.91058e+08	1.66052e+08	2.36311e+08	417787494	2.97302e+08	3.41778e+08	5.14702e+08	2.77833e+08	1.88718e+08	2.48344e+08	3.88531e+08	2.12562e+08	2.05879
P47809	Dual specificity mitogen-activated protein kinase kinase 4 OS=Mus musculus OX=10090 GN=Map2k4 PE=1 SV=2 - [MP2K4_MOUSE]	95.97	1	13	47	450	2.75265e+08	2.50338e+08	127794173	1.71835e+08	1.23166e+08	3.23945e+08	2.45127e+08	2.76376e+08	1.59031e+08	1.09057e+08	2.48426e+08	225208983	1.42817e+08	2.31628e+08	1.77309e+08	1.87184e+08	1.27596e+08	1.52614e+08	1.9653e+08	2.25132e+08	1.61572e+08	1.60317e+08	2.39695e+08	3.67813e+08	1.9919e+08	1.86209e+08	215415992	2.56904e+08	2.44125e+08	1.95884e+08	1.54803e+08	1.95682e+08	2.10553e+08	2.3177e+08	2.01859e+08	314865548	201313297	2.12327e+08	1.8968e+08	2.22707e+08	2.05078e+08	1.77811e+08	1.08118
P35922	Synaptic functional regulator FMR1 OS=Mus musculus OX=10090 GN=Fmr1 PE=1 SV=1 - [FMR1_MOUSE]	95.93	1	5	71	349	206167411	1.19047e+08	3.63943e+08	1.22708e+08	8.37992e+07	163921337	5.70065e+08	2.11951e+08	4.07506e+08	9.55009e+07	2.74913e+08	1.51468e+09	1.51315e+08	1.16316e+08	3.86206e+08	1.33796e+08	1.05445e+08	7.58533e+07	1.5185e+08	2.14661e+08	3.47788e+08	1.2106e+08	7.83657e+07	3.05191e+08	3.51181e+08	4.75957e+08	5.77185e+08	4.64354e+08	1.93132e+08	1.48482e+08	1.5276e+08	1.5191e+08	2.12408e+08	2.08103e+08	2.73526e+08	2.66753e+08	2.10632e+08	218980240	1.79133e+08	2.89789e+08	4.88686e+08	1.36321e+08	2.72806
Q9DB05	Alpha-soluble NSF attachment protein OS=Mus musculus OX=10090 GN=Napa PE=1 SV=1 - [SNAA_MOUSE]	95.93	1	14	44	623	6.5211e+08	4.88432e+08	4.80885e+08	6.02336e+08	4.77634e+08	7.00937e+08	7.40392e+08	6.66444e+08	7.02152e+08	3.51469e+08	5.55462e+08	839941628	5.97963e+08	8.15464e+08	6.4577e+08	5.07588e+08	560097350	5.03475e+08	6.73321e+08	8.15598e+08	4.72352e+08	5.58846e+08	4.74614e+08	7.16016e+08	479871362	5.76255e+08	9.56523e+08	6.96865e+08	7.82667e+08	6.1935e+08	4.93837e+08	6.90858e+08	804905534	9.20005e+08	4.89229e+08	1.41026e+09	5.25202e+08	8.5287e+08	5.40279e+08	6.32279e+08	6.9092e+08	6.12016e+08	1.27882
Q9D7N9	Adipocyte plasma membrane-associated protein OS=Mus musculus OX=10090 GN=Apmap PE=1 SV=1 - [APMAP_MOUSE]	95.9	1	5	34	239	8.17435e+07	9.00047e+07	4.77248e+07	6.65937e+07	6.13247e+07	6.10401e+07	1.36047e+08	1.23775e+08	9.28149e+07	3.0086e+07	7.87857e+07	1.16404e+08	78556250	8.56171e+07	1.46374e+08	8.18825e+07	4.87165e+07	6.3787e+07	67854928	1.41085e+08	5.39745e+07	5.66526e+07	6.0788e+07	1.32716e+08	6.03613e+07	1.12469e+08	1.20395e+08	185423340	8.36541e+07	1.42848e+08	6.37184e+07	7.00748e+07	206258946	1.36703e+08	8.52348e+07	4.26692e+08	9.71028e+07	7.93186e+07	6.94783e+07	8.87525e+07	1.01147e+08	8.06651e+07	1.45581
P62631	Elongation factor 1-alpha 2 OS=Mus musculus OX=10090 GN=Eef1a2 PE=1 SV=1 - [EF1A2_MOUSE]	95.9	1	14	59	1810	8.46024e+09	4.58887e+09	4.25185e+09	5.07635e+09	3.59049e+09	7.75055e+09	6.80102e+09	4.54381e+09	5.19301e+09	3.22492e+09	6.42702e+09	7.23303e+09	4343700228	6.54981e+09	5.04695e+09	5.36284e+09	4.98478e+09	4.59893e+09	5.7389e+09	6.44974e+09	5.47742e+09	4.82661e+09	4.59222e+09	4.63773e+09	5879794482	5.7459e+09	7.06115e+09	5.30128e+09	5805804305	6.22952e+09	4.80178e+09	5292387026	5.67574e+09	7.26484e+09	5.54935e+09	7874127333	5465519232	5.50855e+09	5.19356e+09	5.50266e+09	5.9201e+09	5.42704e+09	1.13989
P46638	Ras-related protein Rab-11B OS=Mus musculus OX=10090 GN=Rab11b PE=1 SV=3 - [RB11B_MOUSE]	95.87	3	12	27	463	3.42567e+09	997687170	1.67728e+09	2.03644e+09	1.77143e+09	2.5789e+09	2.59111e+09	1.20511e+09	7.06933e+08	2.13848e+09	2.94486e+09	2.14615e+09	1.80138e+09	3.00194e+09	611403658	716619950	1.42785e+09	1.97625e+09	2.97047e+09	3.66123e+09	2.03996e+09	1.94907e+09	1.84021e+09	1.23319e+09	2.49034e+09	1753652294	2.30726e+09	2.29349e+09	2.65253e+09	2.40995e+09	1.86984e+09	2405630960	3.67897e+09	2.39977e+09	6.75445e+08	2.73857e+09	2.26362e+09	1.92924e+09	1.9817e+09	1.84411e+09	2.10115e+09	2.15048e+09	1.06027
P00493	Hypoxanthine-guanine phosphoribosyltransferase OS=Mus musculus OX=10090 GN=Hprt1 PE=1 SV=3 - [HPRT_MOUSE]	95.87	1	12	36	426	6.57839e+08	3.6067e+08	4.11342e+08	3.79613e+08	280915200	6.93862e+08	6.02232e+08	398035094	366095467	2.62475e+08	4.7882e+08	7.07603e+08	3.33328e+08	4.84833e+08	433205320	4.5124e+08	3.90679e+08	3.82676e+08	4.17954e+08	4.95152e+08	3.93731e+08	3.67824e+08	3.52965e+08	6.77032e+08	3.95338e+08	543985661	5.75871e+08	4.37711e+08	4.56245e+08	5.18277e+08	3.1015e+08	3.73324e+08	4.48061e+08	5.97774e+08	4.42772e+08	7.4158e+08	4.41213e+08	4.76955e+08	4.18076e+08	4.6454e+08	4.87558e+08	4.2754e+08	1.1662
Q91VC3	Eukaryotic initiation factor 4A-III OS=Mus musculus OX=10090 GN=Eif4a3 PE=1 SV=3 - [IF4A3_MOUSE]	95.86	1	12	58	450	1.47199e+09	3.27008e+08	3.17531e+08	4.01605e+08	3.21446e+08	6.21237e+08	5.18177e+08	4.12309e+08	410746298	3.35397e+08	5.50499e+08	5.32956e+08	3.45118e+08	6.36143e+08	1.13621e+09	4.03564e+08	3.9424e+08	4.06941e+08	9.77644e+08	5.41098e+08	6.00598e+08	4.31942e+08	3.80976e+08	3.78812e+08	4.98931e+08	4.18053e+08	6.5223e+08	1.12999e+09	5.75247e+08	4.29633e+08	3.53926e+08	1.42551e+09	498918024	573377938	4.81189e+08	6.98048e+08	4.75967e+08	4.52345e+08	5.67917e+08	4.59573e+08	6.40186e+08	5.44698e+08	1.12725
Q9WTP6	Adenylate kinase 2, mitochondrial OS=Mus musculus OX=10090 GN=Ak2 PE=1 SV=5 - [KAD2_MOUSE]	95.82	1	4	35	161	4.12796e+08	2.58087e+08	4.08638e+07	1.28055e+08	3.32657e+07	3.51804e+07	2.4952e+08	2.27515e+08	2.77175e+08	9.32769e+07	3.88433e+08	4.67924e+08	1.44453e+08	1.37565e+08	7.63815e+07	8.45985e+07	216965497	4.55112e+07	3.14106e+07	1.93344e+08	1.92149e+08	2.68202e+08	1.51787e+08	5.62783e+07	1.62687e+08	4.26162e+08	1.8701e+08	3.19958e+08	1.80237e+08	3.71512e+08	1.45868e+08	3.01745e+08	6.89842e+07	47600694	2.51229e+08	4.29414e+08	7.37766e+07	5.54055e+07	1.74613e+08	1.76533e+08	2.42951e+08	1.14366e+08	1.39137
Q8R0Y6	Cytosolic 10-formyltetrahydrofolate dehydrogenase OS=Mus musculus OX=10090 GN=Aldh1l1 PE=1 SV=1 - [AL1L1_MOUSE]	95.79	3	48	99	1295	3.66682e+09	2.94516e+08	199383722	2.57842e+08	1.93759e+08	4.21455e+08	4.29327e+08	3.14864e+08	1.98093e+09	1.66176e+09	2.96806e+08	1.70301e+09	2.53614e+08	3.33435e+08	282514356	2.76112e+08	2.75237e+08	1.65064e+09	283484442	323190722	2.66139e+08	2.97683e+08	2.297e+08	2.79101e+08	3.10603e+08	3.85446e+08	4.16198e+08	2.83847e+08	2.87755e+09	283048888	2.3944e+08	2.99516e+08	3.28471e+08	4.78167e+08	3.59265e+08	5.51591e+08	302646102	3.632e+08	9.22464e+08	9.61667e+08	5.73876e+08	5.61732e+08	0.622112
Q8K2T1	NmrA-like family domain-containing protein 1 OS=Mus musculus OX=10090 GN=Nmral1 PE=1 SV=1 - [NMRL1_MOUSE]	95.79	1	7	29	93	96756475	5.57283e+07	0	24278348	42766074	2.5141e+08	6.57337e+07	32518780	0	3.45948e+07	3.73997e+07	78774500	1.1654e+08	8.3156e+06	5.4834e+07	2.32908e+08	0	29267597	49455469	3.14281e+08	4.24576e+07	0	3.33638e+07	2.63712e+07	71901966	2.10156e+07	4.06305e+08	3.57941e+08	7.2249e+07	3.79748e+07	0	2.10313e+07	52409710	94278179	5.58016e+07	1.19397e+08	1.6369e+07	3.54642e+07	4.39058e+07	7.68514e+07	5.91727e+07	1.25182e+08	1.34772
Q01853	Transitional endoplasmic reticulum ATPase OS=Mus musculus OX=10090 GN=Vcp PE=1 SV=4 - [TERA_MOUSE]	95.78	3	54	121	2355	1.491e+09	1.22002e+09	9.91304e+08	1.09838e+09	8.75856e+08	1.59091e+09	1.6362e+09	1.40805e+09	1243283983	7.35187e+08	1.32281e+09	1.96023e+09	1.3827e+09	1.4734e+09	1249379791	1.02694e+09	1.35322e+09	1062866657	1.42301e+09	1.58944e+09	1.33196e+09	1.12572e+09	1.2057e+09	1.26517e+09	1.25528e+09	1.55207e+09	1.84016e+09	1.46315e+09	1.65483e+09	1.37554e+09	1.09929e+09	1.75372e+09	1.68545e+09	2.13934e+09	1.26243e+09	6.42366e+09	1.27531e+09	1.91502e+09	1.13531e+09	1.32273e+09	1.4777e+09	1.29109e+09	1.30158
P18760	Cofilin-1 OS=Mus musculus OX=10090 GN=Cfl1 PE=1 SV=3 - [COF1_MOUSE]	95.78	1	18	36	2074	8.44979e+09	6.46717e+09	5.85856e+09	6.74716e+09	5.42593e+09	9001383452	8.43327e+09	7.91519e+09	6.50575e+09	4.08683e+09	7.07557e+09	9.82933e+09	6695498521	8.83626e+09	7.70482e+09	6.79941e+09	7.58322e+09	6.98344e+09	7503369852	9.01837e+09	6.48658e+09	6.61339e+09	6786477014	8095391252	7.119e+09	8.31704e+09	1.03075e+10	7.50534e+09	8.93105e+09	7.81523e+09	6.55429e+09	8.71976e+09	8.44292e+09	1.02926e+10	7.72608e+09	1.25902e+10	7.8494e+09	8.96804e+09	6.58972e+09	7.18848e+09	8.02829e+09	7.57756e+09	1.21831
Q9QZD9	Eukaryotic translation initiation factor 3 subunit I OS=Mus musculus OX=10090 GN=Eif3i PE=1 SV=1 - [EIF3I_MOUSE]	95.69	1	10	34	257	1.97211e+08	4.93308e+07	9.31946e+07	1.64681e+08	2.03284e+07	1.94765e+08	2.89316e+08	6.78342e+07	4.30665e+07	4.3166e+07	297214169	5.96956e+07	7.53297e+07	5.53722e+07	1.56413e+08	5.54526e+07	4.0822e+07	2.65731e+06	1.06899e+08	1.62104e+08	5.50126e+07	3.54536e+07	5.77488e+07	4.3473e+07	225352706	5.07986e+07	2.23907e+08	4.96313e+07	9.92038e+07	1.26661e+08	5.55405e+07	4.18658e+07	4.74245e+07	298837006	1.40644e+08	1.13956e+08	1.19012e+08	2.11458e+08	1.04949e+08	1.2763e+08	1.28805e+08	7.3587e+07	1.22731
Q8K4B0	Metastasis-associated protein MTA1 OS=Mus musculus OX=10090 GN=Mta1 PE=1 SV=1 - [MTA1_MOUSE]	95.66	2	2	89	273	5.86219e+07	3.38169e+07	6.70293e+08	1.34785e+08	1.0561e+08	1.41244e+08	3.10704e+08	2.4629e+08	1.27732e+08	6.61404e+07	1.1964e+08	1.5641e+09	2.46042e+08	2.49998e+08	1.86458e+08	2.29612e+07	2.11783e+08	1.66744e+08	2.74224e+07	1.19059e+08	4.50524e+07	4.1518e+07	1.76087e+08	6.24749e+08	2.21394e+07	1.38617e+08	1.06709e+08	1.99246e+08	1.56219e+08	1.92069e+08	1.01162e+08	1.09396e+08	2.33196e+08	2.64712e+08	1.10478e+08	274512795	2.54366e+08	905348002	2.00625e+08	1.78422e+08	4.73247e+08	1.09594e+08	2.35886
Q9DCD0	6-phosphogluconate dehydrogenase, decarboxylating OS=Mus musculus OX=10090 GN=Pgd PE=1 SV=3 - [6PGD_MOUSE]	95.65	1	17	58	576	2.31726e+08	2.82255e+08	1.24595e+08	1.21946e+08	2.36602e+08	2.24981e+08	4.07743e+08	1.50189e+08	1.96889e+08	1.29025e+08	1.93059e+08	3.11632e+08	1.34485e+08	2.84125e+08	177004752	1.10519e+09	1.48883e+08	1.44185e+08	201182405	2.3198e+08	1.23202e+08	1.37387e+08	1.47118e+08	1.55664e+08	2.01686e+08	1.93478e+08	2.35207e+08	1.82774e+08	242397413	1.73254e+08	1.34754e+08	1.30601e+08	1.60555e+08	2.28892e+08	1.79935e+08	2.79076e+08	2.15401e+08	1.9981e+08	1.99425e+08	2.21765e+08	2.20061e+08	3.66285e+08	1.10348
P32233	Developmentally-regulated GTP-binding protein 1 OS=Mus musculus OX=10090 GN=Drg1 PE=1 SV=1 - [DRG1_MOUSE]	95.64	1	4	41	195	8.79385e+07	3.0198e+07	5.13426e+07	2.96912e+07	23860457	3.09533e+07	2.10355e+07	7.70942e+07	9.41526e+07	6.35727e+07	9.98679e+07	4.44589e+07	77599537	1.68379e+08	4.65445e+07	3.28397e+07	25885739	960643	6.05239e+07	37171183	2.53887e+07	3.14095e+07	9.78369e+06	4.08685e+07	20960720	1.10148e+08	1.23136e+08	1.35456e+08	4.36359e+07	4.32567e+07	54103091	8.53387e+06	8.02494e+07	53582115	9.12198e+07	7.35971e+07	19634077	4.58795e+07	4.46062e+07	5.73617e+07	8.737e+07	3.14762e+07	1.9587
Q8QZT2	Centriole, cilia and spindle-associated protein OS=Mus musculus OX=10090 GN=Ccsap PE=1 SV=1 - [CCSAP_MOUSE]	95.63	1	5	39	247	5.38696e+09	1.48879e+08	4.60662e+07	2.36592e+08	2.84244e+07	6.25882e+09	1.7806e+08	3.44495e+07	1.12405e+08	2.50373e+09	1.89502e+08	6.78298e+09	4.29765e+09	4.76267e+08	1.16044e+08	6.41829e+06	4.9816e+09	1.34518e+08	3.9022e+08	260412828	2.12403e+08	2.98808e+08	1.02854e+08	2.4725e+07	1.43593e+08	4.66429e+07	6.95209e+07	1.12602e+08	2.02128e+08	2.11717e+08	3.49524e+09	1.21256e+08	3.34947e+08	4.58768e+08	5.82043e+07	322644156	5.54896e+07	1.49526e+08	1.16938e+09	1.81749e+09	2.37249e+09	1.15463e+09	2.02883
Q9D8S9	BolA-like protein 1 OS=Mus musculus OX=10090 GN=Bola1 PE=1 SV=1 - [BOLA1_MOUSE]	95.62	1	5	17	118	9.38624e+07	0	2.42413e+07	2.87085e+07	3.24478e+07	0	61508908	40522590	4.89147e+07	3.75935e+07	2.12534e+07	57071863	1.86169e+07	3.37153e+08	2.37158e+07	3.06735e+07	42865904	2.90709e+07	2.89686e+08	4.81276e+08	1.22787e+07	2.04765e+07	2.7937e+07	3.57667e+07	5.48013e+07	4.1207e+07	6.64014e+07	2.73782e+08	3.03383e+08	2.41154e+07	1.78571e+07	5.30684e+07	3.73894e+07	4.77492e+07	3.64996e+07	5.08796e+08	4.23717e+08	2.66447e+07	3.5852e+07	3.77079e+07	9.15623e+07	1.74715e+08	2.55389
Q64152	Transcription factor BTF3 OS=Mus musculus OX=10090 GN=Btf3 PE=1 SV=3 - [BTF3_MOUSE]	95.59	1	5	25	180	2.90482e+08	6.12722e+07	7.89792e+07	8.98913e+07	5.9607e+07	9.62926e+07	1.42277e+08	7.70007e+07	1.61343e+08	3.4904e+07	66066151	1.17845e+08	73017223	1.34224e+08	9.7277e+07	6.72383e+07	4.98362e+07	8.10452e+07	1.3518e+08	9.6029e+07	7.35082e+07	1.31964e+08	7.85392e+07	1.07906e+08	7.64289e+07	6.09102e+07	1.75567e+08	9.56992e+07	1.01911e+08	87312275	5.94317e+07	5.57839e+07	9.60435e+07	8.46756e+07	3.23026e+07	1.63212e+08	9.37333e+07	1.10912e+08	1.16046e+08	1.02363e+08	9.76857e+07	8.58658e+07	0.841781
P34022	Ran-specific GTPase-activating protein OS=Mus musculus OX=10090 GN=Ranbp1 PE=1 SV=2 - [RANG_MOUSE]	95.57	1	8	25	242	4.63448e+08	6.97609e+08	1.81805e+08	3.1075e+08	2.38105e+08	3.99149e+08	7.26271e+08	4.3642e+08	3.0075e+08	2.32513e+08	3.77016e+08	504545520	3.35898e+08	3.99972e+08	3.37392e+08	3.20427e+08	377985369	3.44289e+08	674222836	4.74858e+08	2.26626e+08	340254754	3.43482e+08	4.10591e+08	356185759	4.39207e+08	9.02531e+08	5.35181e+08	4.4024e+08	3.97371e+08	3.21091e+08	3.27335e+08	3.74988e+08	524074087	4.21659e+08	6.268e+08	4.11144e+08	5.41787e+08	3.78344e+08	4.19021e+08	3.90965e+08	4.38356e+08	1.03336
Q9Z2U0	Proteasome subunit alpha type-7 OS=Mus musculus OX=10090 GN=Psma7 PE=1 SV=1 - [PSA7_MOUSE]	95.56	2	14	35	496	8.12096e+08	4.05359e+08	4.32607e+08	5.819e+08	4.14053e+08	814765851	6.83204e+08	553397768	4.78476e+08	2.90082e+08	592361910	8.26483e+08	4.60764e+08	6.14998e+08	4.77448e+08	5.3313e+08	5.00103e+08	4.96796e+08	5.44744e+08	606907178	4.13508e+08	4.88291e+08	4.20054e+08	4.62566e+08	5.84834e+08	5.87048e+08	8.26941e+08	5.17412e+08	5.84355e+08	6.29611e+08	4.49571e+08	6.41688e+08	5.95093e+08	797124716	5.8112e+08	943360096	5.25947e+08	590791525	5.29203e+08	5.63985e+08	5.94411e+08	5.36336e+08	1.12322
Q8K1M6	Dynamin-1-like protein OS=Mus musculus OX=10090 GN=Dnm1l PE=1 SV=2 - [DNM1L_MOUSE]	95.55	1	45	114	1900	1.05062e+09	1.32195e+09	5.44668e+08	6.43923e+08	9.03944e+08	1.00766e+09	1.07036e+09	1706965281	1.42278e+09	8.04597e+08	1.55525e+09	1.04422e+09	1.24081e+09	1.49969e+09	8.10073e+08	1.29505e+09	7.86443e+08	1.17543e+09	8.48612e+08	2.0387e+09	7.23017e+08	6.67914e+08	1.41231e+09	9.08137e+08	8.40374e+08	6.56422e+08	1.17406e+09	1439647659	1.19244e+09	5.47932e+08	3.91618e+08	8.44287e+08	1.66868e+09	8.76479e+08	763033044	9.60693e+08	8.33023e+08	1.0897e+09	8.93021e+08	1.20247e+09	1.23001e+09	1.22885e+09	1.37736
Q8BN59	La-related protein 6 OS=Mus musculus OX=10090 GN=Larp6 PE=1 SV=1 - [LARP6_MOUSE]	95.53	1	2	49	124	1.73968e+09	2.01362e+07	0	8.74763e+07	1.34543e+07	0	6.05392e+08	7.54994e+06	3.65822e+08	6.51933e+07	7.8576e+08	110787894	9.39033e+08	3.23252e+08	8.28487e+07	7.95467e+08	1.56716e+08	3.55563e+08	2.08335e+08	1.19379e+08	1.01142e+09	2.96849e+08	8.32087e+07	8.06937e+07	8.18345e+08	5.13243e+08	738337979	5.64759e+07	6.23327e+07	5.49107e+08	0	4.14898e+08	4.98499e+08	2.30862e+08	2.44657e+07	0	5.77763e+08	1.43111e+08	3.72149e+08	2.08792e+08	4.48336e+08	3.27092e+08	1.20472
O88746	Target of Myb protein 1 OS=Mus musculus OX=10090 GN=Tom1 PE=1 SV=1 - [TOM1_MOUSE]	95.53	1	14	42	318	8.00534e+07	6.01229e+07	9.09058e+07	7.61386e+07	4.60732e+07	7.37601e+07	92802799	6.52485e+07	1.25403e+08	3.93572e+07	5.35071e+07	9.46426e+07	6.44505e+07	2.0186e+08	1.45098e+08	1.09299e+08	7.28358e+07	1.09922e+08	4.06759e+08	1.82752e+08	4.61422e+07	5.97558e+07	1.58545e+08	66842505	7.26845e+07	8.1316e+07	1.15998e+08	1.54459e+08	192466326	7.14733e+07	6.49381e+07	9.18114e+07	1.56902e+08	1.07161e+08	1.08776e+08	2.17886e+08	7.26142e+07	1.1596e+08	7.06588e+07	7.93143e+07	1.11912e+08	1.76314e+08	1.58383
O35685	Nuclear migration protein nudC OS=Mus musculus OX=10090 GN=Nudc PE=1 SV=1 - [NUDC_MOUSE]	95.48	1	16	65	603	2.26585e+08	1.16635e+08	1.0094e+08	1.8407e+08	9.63883e+07	3.3836e+08	1.92477e+08	2.21299e+08	1.40251e+08	1.31701e+08	323789339	1.80665e+08	1.63779e+08	1.98629e+08	1.68441e+08	1.25396e+08	1.39651e+08	1.16561e+08	2.16073e+08	2.34592e+08	1.17452e+08	9.39538e+07	1.1952e+08	1.49999e+08	2.68387e+08	1.56868e+08	1.92323e+08	160119186	3.05807e+08	1.56956e+08	1.83111e+08	1.16256e+08	2.12617e+08	1.89548e+08	2.14333e+08	2.42398e+08	2.26332e+08	2.45524e+08	1.44924e+08	2.04818e+08	2.07061e+08	1.66455e+08	1.42876
Q8K4R4	Cytoplasmic phosphatidylinositol transfer protein 1 OS=Mus musculus OX=10090 GN=Pitpnc1 PE=1 SV=1 - [PITC1_MOUSE]	95.48	1	5	40	194	2.70544e+08	2.17476e+08	52893814	3.5563e+07	1.07675e+08	3.73288e+07	2.63168e+08	9.31114e+06	5.34839e+07	34346638	7.87204e+07	2.72077e+08	1.20357e+08	1.64689e+08	1.01741e+08	2.12621e+08	1.05726e+08	3.59496e+07	2.41144e+08	2.90963e+08	1.34936e+08	6.33944e+07	1.07093e+07	1.65042e+08	4.02109e+07	3.09805e+08	2.37462e+08	1.48024e+08	2.01481e+08	4.40497e+07	1.32108e+08	5.52228e+07	1.73945e+08	4.10382e+08	2.4263e+07	3.86025e+08	1.83796e+08	2.61701e+08	1.3683e+08	7.95277e+07	1.47517e+08	1.77281e+08	1.0781
Q9R1Q8	Transgelin-3 OS=Mus musculus OX=10090 GN=Tagln3 PE=1 SV=1 - [TAGL3_MOUSE]	95.48	1	15	35	1104	1.22181e+09	8.81912e+08	8.71398e+08	1160706851	732110375	1.54953e+09	1.22831e+09	1.17485e+09	1.88938e+09	564310245	1.12427e+09	1.64277e+09	1.2815e+09	1.66707e+09	964053866	9.18601e+08	1.0929e+09	8.69508e+08	1.38509e+09	1.49657e+09	1.02468e+09	1.14422e+09	8.63891e+08	1.2789e+09	1.02092e+09	1.08439e+09	1760924547	1.09586e+09	1.2965e+09	1.07751e+09	9.16182e+08	1.15369e+09	1.56247e+09	1.4007e+09	1.10982e+09	1.95923e+09	1.38027e+09	1.47803e+09	9.73588e+08	1.28127e+09	1.33593e+09	1.15253e+09	1.37217
Q64520	Guanylate kinase OS=Mus musculus OX=10090 GN=Guk1 PE=1 SV=2 - [KGUA_MOUSE]	95.45	1	8	23	180	7.26056e+07	1.62274e+08	4.31193e+07	5.67507e+07	6.47247e+07	2.53741e+08	8.06313e+07	4.10791e+07	7.46118e+07	3.66492e+07	2.26037e+08	7.48463e+07	8.41975e+07	8.00302e+07	8.6062e+07	1.15642e+08	2.41659e+07	8.73575e+07	6.5577e+07	1.79461e+08	4.50147e+07	3.44231e+07	8.07705e+07	5.67792e+07	9.57216e+07	41864852	6.85233e+07	2.3077e+08	115352113	92271143	2.50033e+08	8.98394e+07	1.24644e+08	6.84453e+07	8.59928e+07	3.47605e+07	8.44369e+07	9.89247e+07	7.98949e+07	9.73424e+07	1.10235e+08	9.44405e+07	1.37974
Q9CRB6	Tubulin polymerization-promoting protein family member 3 OS=Mus musculus OX=10090 GN=Tppp3 PE=1 SV=1 - [TPPP3_MOUSE]	95.45	1	8	27	222	1.32173e+08	7.92317e+07	74977300	8.111e+07	7.08536e+07	1.08415e+08	1.54314e+08	2.26399e+08	1.2054e+08	7.43429e+07	1.17997e+08	1.63415e+08	7.68428e+07	1.33576e+08	1.29782e+08	2.43952e+08	112572652	1.50303e+08	9.93901e+07	1.56681e+08	6.2333e+07	8.48967e+07	9.94485e+07	1.02456e+08	1.26142e+08	1.71271e+08	1.35811e+08	1.03189e+08	1.25504e+08	1.5748e+08	7.48267e+07	9.64462e+07	1.2811e+08	170564214	1.39998e+08	2.38145e+08	1.17233e+08	1.27586e+08	8.76692e+07	1.36802e+08	1.24323e+08	1.5258e+08	1.41809
Q9QZH3	Peptidyl-prolyl cis-trans isomerase E OS=Mus musculus OX=10090 GN=Ppie PE=1 SV=2 - [PPIE_MOUSE]	95.35	2	2	36	137	82888016	35116171	1.30911e+08	7.99931e+07	1.20305e+09	6.06732e+07	1.60614e+08	9.69138e+07	6.65726e+07	1.25924e+09	6195474336	8.22349e+07	1.58243e+08	2500345640	1.73357e+09	2.64945e+09	8.66881e+07	1.22356e+08	61935765	1.38414e+08	3.26613e+07	4.12132e+08	5.38003e+07	79294329	5.1386e+07	1.93965e+08	4.66922e+07	1.20266e+08	2.36172e+09	64187804	5.1264e+08	2.59286e+09	4.43484e+07	4.52011e+07	1.77816e+09	0	1.08517e+08	2.12887e+09	3.06392e+08	3.28803e+08	2.13397e+09	6.11768e+08	6.96485
Q9CQD1	Ras-related protein Rab-5A OS=Mus musculus OX=10090 GN=Rab5a PE=1 SV=1 - [RAB5A_MOUSE]	95.35	1	6	25	298	2.06662e+08	1.48686e+08	1.1687e+08	1.508e+08	8.75936e+07	231149612	2.0332e+08	1.30348e+08	1.30754e+08	7.11835e+07	1.63998e+08	2.16023e+08	1.33159e+08	1.6607e+08	1.29652e+08	1.64157e+08	1.23666e+08	3.62299e+08	1.5749e+08	1.59635e+08	1.98926e+08	1.11113e+08	9.58597e+07	1.38312e+08	1.28128e+08	1.60752e+08	178314352	1.24433e+08	3.18992e+08	1.43049e+08	8.69895e+07	1.06829e+08	1.32153e+08	2.09513e+08	2.31851e+08	2.62529e+08	1.45576e+08	209713459	1.42122e+08	1.53351e+08	1.61781e+08	1.93449e+08	1.13832
Q923D4	Splicing factor 3B subunit 5 OS=Mus musculus OX=10090 GN=Sf3b5 PE=1 SV=1 - [SF3B5_MOUSE]	95.35	1	4	7	32	5.42986e+07	3.06488e+07	7.91769e+07	2.71247e+07	1.55817e+07	0	3.17584e+07	2.73448e+07	2.91651e+07	0	35053091	1.13298e+06	0	3.70684e+07	0	1.67007e+07	0	2.17703e+07	36435408	4.96233e+07	0	0	0	156976904	4.03378e+07	3.0126e+07	48805158	25171457	3.96047e+07	0	0	2.37832e+07	4.14811e+07	5.3474e+07	3.51312e+07	6.98373e+07	41919173	0	4.13662e+07	1.76537e+07	1.46509e+07	2.49059e+07	0.354176
Q9CY58	Plasminogen activator inhibitor 1 RNA-binding protein OS=Mus musculus OX=10090 GN=Serbp1 PE=1 SV=2 - [PAIRB_MOUSE]	95.33	1	12	55	471	3.53598e+08	1.69805e+08	3.71479e+08	2.50671e+08	1.16016e+08	2.39237e+08	3.13643e+08	326487829	2.79063e+08	1.1029e+08	2.43998e+08	4.26464e+08	1.97174e+08	3.1815e+08	2.87938e+08	2.26154e+09	3.17781e+08	2.12635e+08	1175427300	2.23854e+08	1.83003e+08	4.09653e+08	253371286	1.90983e+08	2.45498e+09	1.96861e+08	2.47192e+08	2.27268e+08	2.3525e+08	2.19494e+08	5.27397e+08	1.67895e+08	2.5283e+08	2.68513e+08	1.97197e+08	5.55661e+08	2.33359e+08	3.07938e+08	2.52314e+08	2.53744e+08	2.94745e+08	8.38247e+08	1.16817
O35127	Protein C10 OS=Mus musculus OX=10090 GN=Grcc10 PE=1 SV=1 - [C10_MOUSE]	95.24	1	4	12	147	8.8635e+07	6.11796e+07	3.87942e+07	6.05637e+07	3.31846e+07	1.02571e+08	7.61766e+07	1.29544e+08	5.39986e+07	3.43771e+07	93831974	1.76947e+08	2.3896e+07	6.7387e+07	7.53473e+07	6.53613e+07	5.31905e+07	3.74893e+07	9.95276e+07	8.42674e+07	5.25474e+07	6.07722e+07	4.34325e+07	4.06952e+07	7.27085e+07	1.01914e+08	7.47336e+07	6.67836e+07	1.05706e+08	6.90164e+07	1.33624e+08	1.00861e+08	7.3527e+07	7.03596e+07	7.94763e+07	1.43079e+08	6.39642e+07	70219149	5.64714e+07	7.93334e+07	8.74819e+07	6.79672e+07	1.54914
Q64475	Histone H2B type 1-B OS=Mus musculus OX=10090 GN=H2bc3 PE=1 SV=3 - [H2B1B_MOUSE]	95.24	9	3	22	812	9.63988e+09	7.45978e+09	6.69081e+09	5.70949e+09	3.73927e+09	10261409844	9.76483e+09	5.52785e+09	4.29119e+09	4339283303	7697487088	9.81207e+09	3.88306e+09	5.61308e+09	5.49463e+09	7.38941e+09	5.75614e+09	6.19302e+09	5.73045e+09	6.83507e+09	4.6249e+09	4495119155	6.62771e+09	4.67433e+09	5916924172	9.00244e+09	6.95322e+09	5.08309e+09	6.65517e+09	8.40915e+09	3.69318e+09	4.10459e+09	4.73788e+09	1.19403e+10	9.51112e+09	1.26939e+10	6236903829	5.97072e+09	6.64785e+09	6.83691e+09	6.50007e+09	6.38082e+09	0.97777
P47964	60S ribosomal protein L36 OS=Mus musculus OX=10090 GN=Rpl36 PE=1 SV=2 - [RL36_MOUSE]	95.24	1	1	21	196	1.20311e+08	4.52211e+08	3.00401e+08	5.86244e+08	638654073	158054505	6.45204e+08	6.81043e+08	6.69515e+07	0	453776136	5.36995e+07	4.41118e+08	9.56019e+08	4.81739e+08	6.08354e+08	5.7186e+08	4.99531e+08	4.59378e+08	7.95582e+08	4.96e+08	7.49157e+08	4.92458e+07	584147787	6.45138e+08	6.60365e+08	1.02789e+09	1.23549e+09	6.21954e+08	7.9773e+08	4.41996e+08	144355401	1.22648e+09	5.1718e+08	856341946	1.02743e+09	8.77267e+08	7.61509e+08	4.19564e+08	3.10251e+08	4.7727e+08	5.86941e+08	1.13754
Q8R5C5	Beta-centractin OS=Mus musculus OX=10090 GN=Actr1b PE=1 SV=1 - [ACTY_MOUSE]	95.21	1	7	46	815	8.27956e+08	5.57735e+08	418376134	6.28817e+08	4.39862e+08	8.74124e+08	1169751929	1309411355	5.84033e+08	4.33323e+08	7.00522e+08	9.19494e+08	6.16774e+08	7.01457e+08	5.71191e+08	5.6062e+08	5.36271e+08	5.77132e+08	5.82712e+08	9.014e+08	5.08722e+08	4.51434e+08	6.46952e+08	1.02577e+09	5.88646e+08	6.57889e+08	6.49076e+08	1.33113e+09	9.65249e+08	5.78468e+08	8.53543e+08	7.15637e+08	8.08051e+08	8.51812e+08	6.89203e+08	1.03012e+09	6.32556e+08	2153944718	5.74549e+08	8.74129e+08	7.01888e+08	6.31627e+08	1.22163
Q9Z0G0	PDZ domain-containing protein GIPC1 OS=Mus musculus OX=10090 GN=Gipc1 PE=1 SV=1 - [GIPC1_MOUSE]	95.2	2	9	41	185	2.20471e+08	7.14834e+07	9.6388e+07	3.90756e+07	5.1118e+07	7.27447e+07	53153030	7.74618e+07	2.14462e+08	1.01172e+08	1.14681e+08	1.00268e+08	3.52616e+07	1.09692e+08	5.39764e+07	2.34278e+08	2.24244e+08	3.11699e+07	6.23232e+08	3.54526e+07	2.45901e+07	8.11735e+07	3.89306e+07	3.20955e+07	2.42427e+08	6.8885e+07	2.07296e+08	1.50028e+08	2.42894e+08	5.69193e+07	6.0117e+07	4.93157e+07	6.91599e+07	3.90893e+07	3.57148e+07	4.31461e+08	4.85668e+07	4.46256e+07	9.57071e+07	1.03799e+08	8.27759e+07	2.29675e+08	0.864887
Q8K183	Pyridoxal kinase OS=Mus musculus OX=10090 GN=Pdxk PE=1 SV=1 - [PDXK_MOUSE]	95.19	1	16	34	800	9.1502e+08	6.16445e+08	6.92384e+08	8.18631e+08	5.57207e+08	1.06651e+09	9.66122e+08	7.30473e+08	9.18485e+08	7.95043e+08	1.09971e+09	1.04621e+09	7.10243e+08	1.18794e+09	8.9066e+08	7.66565e+08	7.41655e+08	7.96038e+08	1.04016e+09	1.41675e+09	7.64578e+08	7.91369e+08	7.24834e+08	6.76282e+08	9.59721e+08	8.32258e+08	1.06343e+09	8.80047e+08	1.08981e+09	1.00582e+09	684953478	8.92917e+08	1390403880	1.0688e+09	8.66965e+08	1.41382e+09	9.37642e+08	9.57406e+08	7.19937e+08	8.95326e+08	9.86954e+08	9.52234e+08	1.37089
Q91VI7	Ribonuclease inhibitor OS=Mus musculus OX=10090 GN=Rnh1 PE=1 SV=1 - [RINI_MOUSE]	95.18	1	14	36	340	2.89608e+08	8.3434e+07	113676335	1.00951e+08	1.27929e+08	1.50249e+08	2.53858e+08	1.03066e+08	1.2099e+08	8.59816e+07	1.50005e+08	1.78633e+08	1.55697e+08	1.86937e+08	1.1032e+08	1.35667e+08	1.01631e+08	1.09791e+08	1.69412e+08	1.42027e+08	1.42062e+08	1.7228e+08	201799991	1.09541e+08	1.88762e+08	1.1301e+08	1.60018e+08	1.16049e+08	1.66224e+08	1.82954e+08	1.61911e+08	1.09052e+08	1.35055e+08	1.49611e+08	1.75695e+08	2.63918e+08	1.66925e+08	1.52173e+08	1.4312e+08	1.42829e+08	1.56318e+08	1.31706e+08	1.09222
P17751	Triosephosphate isomerase OS=Mus musculus OX=10090 GN=Tpi1 PE=1 SV=5 - [TPIS_MOUSE]	95.18	1	21	32	1492	9020525382	7.31833e+09	6.04696e+09	8.00037e+09	5.71272e+09	1.01796e+10	9.89233e+09	8393040848	8.19178e+09	5.43644e+09	8.54717e+09	1.19259e+10	7.29985e+09	1.12043e+10	8329098413	7423220445	9.06812e+09	7.25485e+09	9.38129e+09	1.11728e+10	7.08093e+09	8.03298e+09	6.74731e+09	7.61094e+09	7.66142e+09	9.06486e+09	1.22707e+10	8.2737e+09	9.80307e+09	8434382012	6.61914e+09	8.85508e+09	1.02977e+10	1.16835e+10	7930117966	1.42055e+10	8707724927	1.07801e+10	7.21978e+09	8.41863e+09	9.46126e+09	8.86006e+09	1.31046
Q9D819	Inorganic pyrophosphatase OS=Mus musculus OX=10090 GN=Ppa1 PE=1 SV=1 - [IPYR_MOUSE]	95.16	1	19	40	681	6.60765e+08	4.50686e+08	3.87159e+08	4.05809e+08	313399627	6.11667e+08	581318861	4.77101e+08	4.40103e+08	2.86548e+08	4.90887e+08	6.5852e+08	4.14406e+08	5.38137e+08	5.43133e+08	4.72852e+08	479202896	4.23824e+08	4.24406e+08	6.04088e+08	3.93965e+08	402395572	4.85868e+08	5.20708e+08	4.61609e+08	565675568	680555806	5.92858e+08	7.13074e+08	4.99911e+08	3.85175e+08	5.41528e+08	5.82378e+08	7.30472e+08	5.49112e+08	9.38494e+08	4.90567e+08	5.9684e+08	4.43564e+08	4.79348e+08	5.29017e+08	4.80875e+08	1.19265
P58044	Isopentenyl-diphosphate Delta-isomerase 1 OS=Mus musculus OX=10090 GN=Idi1 PE=1 SV=1 - [IDI1_MOUSE]	95.15	1	9	23	275	1.16597e+08	7.20711e+07	5.64297e+07	5.07889e+07	98027745	1.07878e+08	1.02326e+08	8.59113e+07	9.65773e+07	3.72814e+07	1.06669e+08	1.46782e+08	5.20785e+07	1.87339e+08	2.39671e+08	9.74355e+07	8.55544e+07	5.68759e+07	7.32144e+07	1.12332e+08	5.43415e+07	6.09222e+07	65649660	1.43184e+08	1.10038e+08	82791859	2.13817e+08	9.37803e+07	129485252	4.41813e+07	5.6886e+07	5.68962e+07	1.73827e+08	1.07591e+08	7.2163e+07	343095667	6.58415e+07	1.79752e+08	7.87829e+07	8.59948e+07	1.46508e+08	8.50824e+07	1.85964
P50544	Very long-chain specific acyl-CoA dehydrogenase, mitochondrial OS=Mus musculus OX=10090 GN=Acadvl PE=1 SV=3 - [ACADV_MOUSE]	95.12	1	8	72	317	9.42331e+07	1.48174e+08	1.05737e+08	1.94801e+08	3.35168e+08	3.17111e+08	1.7082e+08	9.73987e+07	3.65421e+08	1.4475e+08	155309248	123217382	3.34719e+08	7.74209e+08	9.42202e+07	1.78028e+08	4.50131e+07	1.19724e+09	5.80873e+08	2.04171e+08	1.54125e+08	8.9588e+07	1.30616e+09	3.42564e+08	220052197	7.87404e+07	1.57241e+08	1.4205e+08	2.44971e+08	1.21803e+08	1.1568e+08	1.0591e+08	1.51402e+09	1.25553e+08	6.62333e+08	1.25277e+08	1.272e+08	1.058e+09	1.75623e+08	2.191e+08	2.96335e+08	4.41065e+08	1.68734
Q9CQV8	14-3-3 protein beta/alpha OS=Mus musculus OX=10090 GN=Ywhab PE=1 SV=3 - [1433B_MOUSE]	95.12	1	12	37	2664	2.65187e+10	1.6236e+10	1.75815e+10	21818681506	1.5552e+10	23156720202	2.35539e+10	19937149903	2.44468e+10	1.31439e+10	2.32673e+10	2.53577e+10	2.09641e+10	2.6761e+10	2.07338e+10	1.79422e+10	1.86028e+10	1.83401e+10	2.57754e+10	2.68477e+10	1.76852e+10	1.93199e+10	18641620081	2.25772e+10	2.16286e+10	1.87117e+10	3.26118e+10	22267407653	2.71036e+10	19968238938	1.70764e+10	2.10739e+10	2.40912e+10	2.13e+10	1.76526e+10	2.89691e+10	2.83758e+10	2.75044e+10	1.95414e+10	2.08477e+10	2.34168e+10	2.15017e+10	1.19832
Q64433	10 kDa heat shock protein, mitochondrial OS=Mus musculus OX=10090 GN=Hspe1 PE=1 SV=2 - [CH10_MOUSE]	95.1	1	9	20	362	1.54523e+09	6.91998e+08	8.92625e+08	1.09405e+09	7.23431e+08	1.4061e+09	1.27859e+09	9.7282e+08	9.97354e+08	8.17352e+08	1.22609e+09	1.30798e+09	7.44945e+08	8.65221e+08	8.37753e+08	1.09656e+09	6.56964e+08	7.81797e+08	9.49558e+08	1.47811e+09	7.99641e+08	5.87579e+08	7.24739e+08	1.18917e+09	1.12875e+09	6.68716e+08	849483765	1.07578e+09	1200590929	1.04761e+09	1.04192e+09	1.41207e+09	1.25431e+09	1.31572e+09	9.04512e+08	1.71425e+09	1.80528e+09	8.93443e+08	9.89466e+08	1.09444e+09	9.96396e+08	9.92599e+08	1.007
P80317	T-complex protein 1 subunit zeta OS=Mus musculus OX=10090 GN=Cct6a PE=1 SV=3 - [TCPZ_MOUSE]	95.1	2	30	74	1143	6.38515e+08	4.25743e+08	3.72623e+08	8.98586e+08	5.09849e+08	6.07888e+08	2.66849e+09	4.77765e+08	3.90735e+08	2.83608e+08	1.53932e+09	6.44128e+08	1.38974e+09	1.07622e+09	7.9289e+08	1.68679e+09	4.14087e+08	4.05626e+08	5.70422e+08	9.35941e+08	3.94009e+08	4.06342e+08	3.84527e+08	7.60299e+08	4.75155e+08	5.25618e+08	1.01982e+09	7.2197e+08	8.49251e+08	4.73756e+08	364092719	2.37739e+09	1.06006e+09	6.95243e+08	5.1422e+08	1223015258	1.0269e+09	9.54202e+08	5.69063e+08	8.85697e+08	1.08846e+09	8.02573e+08	1.91272
Q8K0T4	Katanin p60 ATPase-containing subunit A-like 1 OS=Mus musculus OX=10090 GN=Katnal1 PE=1 SV=1 - [KATL1_MOUSE]	95.08	2	7	61	228	6.40908e+07	6.41537e+07	8.0875e+07	6.29036e+07	5.82367e+07	4.4161e+07	51240461	3.01685e+07	2.64785e+07	4.18458e+07	6.58907e+07	1.35799e+08	1.13356e+08	3.85721e+07	2.42733e+07	1.0666e+08	2.78975e+07	2.07785e+07	6.28517e+07	1.70341e+07	2.86514e+07	5.42981e+07	45906924	8.36582e+07	80976330	4.05021e+07	8.44414e+07	3.31457e+07	1.89016e+08	6.20373e+07	5.72194e+07	5.18249e+07	1.10138e+08	1.39356e+08	8.56164e+07	3.79308e+07	4.93408e+07	8.44039e+07	6.6052e+07	3.87788e+07	7.55781e+07	4.70444e+07	1.14422
Q80ZJ1	Ras-related protein Rap-2a OS=Mus musculus OX=10090 GN=Rap2a PE=1 SV=2 - [RAP2A_MOUSE]	95.08	1	1	21	106	1.4166e+07	4.58742e+07	4.65359e+07	8.50612e+07	2.3794e+07	0	6.61823e+07	3.80493e+07	4.45612e+07	1.09795e+08	0	4.34656e+07	1.97171e+08	9.535e+07	4.49441e+07	0	2.82978e+07	5.79138e+07	5.51007e+07	1.5766e+08	33854978	1.20489e+07	2.31443e+08	7.21147e+07	4.79315e+07	3.93446e+07	44286408	3.8824e+08	3.83458e+07	5.68171e+07	2.38998e+07	2.56095e+07	99343536	9.42925e+07	9.16097e+07	1.73419e+08	6.55598e+07	7.40254e+07	4.30863e+07	5.17175e+07	7.61861e+07	5.97944e+07	1.76822
P62196	26S proteasome regulatory subunit 8 OS=Mus musculus OX=10090 GN=Psmc5 PE=1 SV=1 - [PRS8_MOUSE]	95.07	1	21	73	739	6.09434e+08	2.10076e+08	1.87128e+08	2.36824e+08	1.809e+08	3.47482e+08	1.67314e+09	2.40325e+08	2.17282e+08	1.42742e+08	6.08309e+08	1.4968e+09	2.29103e+08	4.51771e+08	2.16956e+08	6.29847e+08	3.53482e+08	2.96798e+08	3.95369e+08	3.25031e+08	2.83956e+08	2.11374e+08	2.46044e+08	2.25886e+08	4.31433e+08	2.71629e+08	3.23715e+08	2.85819e+08	5.14564e+08	2.34055e+08	1.00784e+09	2.94001e+08	2.94783e+08	1.45703e+09	3.21253e+08	432566436	2.45688e+08	2.91543e+08	2.84873e+08	5.24193e+08	6.00587e+08	4.00106e+08	2.10827
Q8C9R9	EF-hand calcium-binding domain-containing protein 8 OS=Mus musculus OX=10090 GN=Efcab8 PE=2 SV=1 - [EFCB8_MOUSE]	95.07	1	1	20	71	1.24765e+08	4.14641e+07	4.38314e+08	0	1.79999e+08	0	1.27687e+08	577346	0	0	5.05839e+08	5.37685e+07	2.89228e+08	8.45847e+07	9.30564e+07	4.01999e+07	83374119	162111582	6.37337e+07	2.3568e+08	4.38996e+08	2.38517e+08	600634418	2.71998e+08	9.28059e+07	3.23469e+08	2.74987e+08	2.74014e+08	1756589840	4.45017e+07	2.36716e+08	1.92474e+08	1.07155e+08	2.01279e+08	1.85584e+08	1.29571e+08	1.27896e+08	617463216	1.56909e+08	2.56529e+07	2.05295e+08	1.1702e+08	1.30838
Q9D0L8	mRNA cap guanine-N7 methyltransferase OS=Mus musculus OX=10090 GN=Rnmt PE=1 SV=1 - [MCES_MOUSE]	95.05	1	12	61	285	1.77417e+08	9.21177e+07	2.26426e+08	1.56353e+08	92312370	8.29775e+07	8.05544e+07	1.42819e+08	1.90819e+08	2.28767e+08	7.64994e+07	1.58631e+08	5.50023e+08	1.04316e+08	1.44209e+08	6.16389e+07	1.97209e+08	1.59147e+08	3.50197e+07	8.53411e+07	1.58677e+08	1.27808e+08	5.50365e+07	1.52841e+08	1.63322e+08	110404613	1.18363e+08	85759858	1.47588e+08	1.67482e+08	1.08586e+08	1.14374e+08	1.08839e+08	9.05742e+07	1.68045e+08	2.29231e+08	9.28064e+07	7.4149e+07	1.48925e+08	1.45187e+08	2.06736e+08	1.07671e+08	1.38818
Q9R0U0	Serine/arginine-rich splicing factor 10 OS=Mus musculus OX=10090 GN=Srsf10 PE=1 SV=2 - [SRS10_MOUSE]	95.04	1	6	51	252	2.8922e+08	1.97684e+08	7.70278e+07	1.76189e+08	5.38353e+07	276408647	201593938	2.53394e+08	3.19701e+08	1.28735e+08	308726484	2.28153e+08	1.31188e+08	6.26599e+07	2.14158e+08	1.83217e+08	1.46141e+08	2.95153e+08	2.33565e+08	4.95305e+07	4.91413e+07	2.16457e+08	2.27466e+08	1.72929e+08	8.57138e+07	1.706e+08	1.45872e+09	7.44383e+07	2.2778e+08	2.32909e+08	7.13545e+07	153059510	83095968	2.84557e+08	9.03845e+07	2.05507e+08	1.61633e+09	1.64187e+08	1.58791e+08	2.35966e+08	1.88977e+08	1.81521e+08	1.1901
Q9R1P3	Proteasome subunit beta type-2 OS=Mus musculus OX=10090 GN=Psmb2 PE=1 SV=1 - [PSB2_MOUSE]	95.02	1	11	25	324	5.61138e+08	3.93619e+08	3.7171e+08	3.10408e+08	198504276	5.97277e+08	5.72909e+08	4.89976e+08	4.75784e+08	1.91423e+08	456820933	7.26113e+08	4.12536e+08	4.67533e+08	6.7612e+08	3.14532e+08	4.24829e+08	3.9665e+08	3.2967e+08	347179057	260279571	4.44815e+08	2.63361e+08	4.3949e+08	490854512	4.61864e+08	3.88454e+08	3.92508e+08	3.34938e+08	5.04677e+08	2.215e+08	2.73035e+08	3.01322e+08	2.91424e+08	4.38721e+08	626669723	3.24505e+08	9.42494e+08	3.67076e+08	4.65474e+08	5.47824e+08	3.62572e+08	1.4924
Q505F5	Leucine-rich repeat-containing protein 47 OS=Mus musculus OX=10090 GN=Lrrc47 PE=1 SV=1 - [LRC47_MOUSE]	95.01	1	16	70	355	9.94871e+07	65911899	5.3467e+07	8.25595e+07	4.4217e+07	9.08569e+07	6.93408e+07	3.11072e+08	8.35346e+07	5.27597e+07	7.42438e+07	7.98466e+07	7.64042e+07	1.20011e+08	4.76409e+07	5.59195e+07	8.36067e+07	7.62725e+07	107332422	2.568e+08	5.05513e+07	7.28464e+07	5.47948e+07	8.36744e+07	55574661	6.38816e+07	1.01506e+08	9.50005e+07	1.05562e+08	1.1732e+08	6.43918e+07	9.3374e+07	2.28754e+08	1.01092e+08	6.68418e+07	481627629	1.99001e+08	1.5736e+08	6.91285e+07	1.21513e+08	7.96294e+07	1.15986e+08	1.1519
P62830	60S ribosomal protein L23 OS=Mus musculus OX=10090 GN=Rpl23 PE=1 SV=1 - [RL23_MOUSE]	95	1	5	20	196	124361584	1.48424e+08	1.47768e+08	3.56568e+08	2.0272e+08	7.08883e+07	1.12884e+08	88220986	2.95625e+08	2.38059e+08	3.3928e+08	1.5757e+08	3.08356e+08	5.29364e+07	1.48283e+08	2.34511e+08	122194374	2.90042e+08	2.77925e+08	7.01007e+07	1.70648e+08	3.03325e+08	8.86972e+07	110351840	2.15551e+08	1.11333e+08	7.95509e+07	3.67115e+08	2.89823e+08	1.95539e+08	1.584e+08	3.69336e+08	400970742	8.13768e+07	1.44884e+08	5.35013e+07	3.09824e+08	1.38803e+08	1.95968e+08	1.61135e+08	2.01285e+08	1.98955e+08	1.02713
O54879	High mobility group protein B3 OS=Mus musculus OX=10090 GN=Hmgb3 PE=1 SV=3 - [HMGB3_MOUSE]	95	1	3	36	208	4.29423e+08	2.07002e+08	3.54497e+08	3.03061e+08	3.20571e+08	4.48194e+08	5.84269e+08	4.5016e+08	3.81085e+08	1.12021e+08	5.72523e+08	4.29517e+08	3.31956e+08	232098476	2.15017e+08	2.45441e+08	4.08204e+08	4.07339e+08	6.96463e+08	232089402	2.4752e+08	1.94483e+08	3.72621e+08	3.39254e+08	265048396	5.23708e+08	1.09958e+09	1.49857e+08	7.42174e+08	3.07626e+08	3.28554e+08	4.09407e+08	2.8565e+08	2.62709e+08	1.8461e+08	616741167	2.53188e+08	2.53725e+08	3.22911e+08	3.95146e+08	3.56222e+08	3.97907e+08	1.10316
P20357	Microtubule-associated protein 2 OS=Mus musculus OX=10090 GN=Map2 PE=1 SV=2 - [MTAP2_MOUSE]	94.97	2	124	264	5979	1.05537e+10	3.444e+09	1.48788e+09	4.32211e+09	1.24228e+09	2174684775	2.01135e+09	1.96816e+09	1.7993e+09	1.31992e+09	2.005e+09	4.98462e+09	3891879079	2.28292e+09	1.6626e+09	1.50217e+09	1.62524e+09	1.59063e+09	2.19477e+09	2.3099e+09	1649445842	1.83959e+09	4.18113e+09	1.78325e+09	5.47169e+09	1.79032e+09	2.64553e+09	2.10341e+09	2.6775e+09	5.46014e+09	4.04527e+09	1.99353e+09	2.40208e+09	2.16921e+09	1.78815e+09	3.04151e+09	1.94355e+09	2.34557e+09	4.20999e+09	1.85468e+09	2.9654e+09	1.84454e+09	0.704374
Q61171	Peroxiredoxin-2 OS=Mus musculus OX=10090 GN=Prdx2 PE=1 SV=3 - [PRDX2_MOUSE]	94.95	1	13	25	716	3.51719e+09	2.16736e+09	2.61734e+09	2.73816e+09	2.24248e+09	3.1382e+09	3.19189e+09	2.89608e+09	3.00424e+09	2.08959e+09	3.11788e+09	3.44565e+09	2.71443e+09	3.84179e+09	2.98212e+09	2658425284	2.54141e+09	2.93617e+09	3.64831e+09	3.73973e+09	2.40054e+09	2.89959e+09	2.9641e+09	2.44148e+09	3.08807e+09	2.5275e+09	3.43579e+09	3184809706	3.82163e+09	3.18618e+09	2.41998e+09	3.18863e+09	3.36819e+09	3.05823e+09	2.8044e+09	4176820925	3.1634e+09	3.09911e+09	2.65651e+09	2.864e+09	3.22037e+09	3.10481e+09	1.21226
B2RSH2	Guanine nucleotide-binding protein G(i) subunit alpha-1 OS=Mus musculus OX=10090 GN=Gnai1 PE=1 SV=1 - [GNAI1_MOUSE]	94.92	5	6	52	400	9.91606e+08	4.87168e+08	8.65727e+08	1142976517	6.39595e+08	1.04287e+09	9.83662e+08	1.0408e+09	9.74963e+08	4.27745e+08	4.91815e+08	9.66392e+08	1.44832e+09	1297431122	1105134732	1.00366e+09	3.79005e+08	9.86486e+08	9.00019e+08	8.24236e+08	5.99034e+08	6.11208e+08	7.52941e+08	8.64952e+08	8.58455e+08	409933411	1.16166e+09	1018423945	6.05047e+08	9.14162e+08	4.35038e+08	8.4994e+08	1.24751e+09	1.15531e+09	7.57137e+08	2236819234	1.00016e+09	1.10127e+09	8.25414e+08	8.94007e+08	1.06182e+09	8.18681e+08	1.28641
P62774	Myotrophin OS=Mus musculus OX=10090 GN=Mtpn PE=1 SV=2 - [MTPN_MOUSE]	94.92	1	7	13	312	1.45004e+09	7.33399e+08	5.17412e+08	1.04647e+09	6.5836e+08	7.51398e+08	1.41222e+09	6.52812e+08	1.18362e+09	791901367	6.28421e+08	1.32426e+09	5.97378e+08	1308665071	9.25764e+08	5.20893e+08	9.6931e+08	958657533	1.20656e+09	1.68889e+09	8.73882e+08	8.82397e+08	9.72359e+08	1.09438e+09	2.22872e+08	6.60934e+08	1.48522e+09	1.14283e+09	1.54341e+09	6.31492e+08	5.95024e+08	700107030	1.54354e+09	1267460856	5.89696e+08	1494787956	1.45081e+09	1.40977e+09	8.81136e+08	9.5839e+08	9.56897e+08	1.06886e+09	1.08598
Q9WTT4	V-type proton ATPase subunit G 2 OS=Mus musculus OX=10090 GN=Atp6v1g2 PE=1 SV=1 - [VATG2_MOUSE]	94.92	1	9	22	554	1.00208e+09	4.5735e+08	6.84795e+08	1.5861e+09	7.22747e+08	9.07288e+08	1.05112e+09	6.99576e+08	5.28464e+08	6.96597e+08	1.43702e+09	8.25257e+08	1.0466e+09	1183619037	8.79141e+08	931999714	5.43988e+08	8.06733e+08	1.1951e+09	1.30742e+09	1.03392e+09	775669366	8.20749e+08	7.54645e+08	8.55399e+08	5.0386e+08	7.52974e+08	1.2251e+09	1302503899	9.85609e+08	9.1121e+08	5.83246e+08	1.58949e+09	7.85799e+08	6.32477e+08	1.08836e+09	1.04795e+09	8.96219e+08	8.90615e+08	7.76608e+08	1.07433e+09	9.57046e+08	1.20628
Q9Z2Y8	Pyridoxal phosphate homeostasis protein OS=Mus musculus OX=10090 GN=Plpbp PE=1 SV=1 - [PLPHP_MOUSE]	94.89	1	9	30	217	4.40798e+08	3.69589e+08	1.45475e+08	2.57405e+08	6.01017e+07	2.63201e+08	1.40114e+08	2.88471e+08	2.34395e+08	7.49875e+07	2.18986e+08	319088838	196597312	3.35297e+08	2.16863e+08	1.4541e+08	140843896	9.63414e+07	1.43199e+08	273544346	164866573	2.59075e+08	2.34884e+08	3.21468e+08	1.14768e+08	1.45196e+08	3.63699e+08	2.75295e+08	3.13433e+08	1.49746e+08	1.24926e+08	2.69678e+08	9.68381e+07	186738378	124294217	2.28527e+08	1.54767e+08	420678200	2.54674e+08	2.00234e+08	2.57367e+08	1.59868e+08	1.01057
Q8BRT1	CLIP-associating protein 2 OS=Mus musculus OX=10090 GN=Clasp2 PE=1 SV=1 - [CLAP2_MOUSE]	94.87	1	33	157	795	7.08519e+07	7.3469e+07	4.58687e+07	8.37498e+07	2.21728e+09	7.17609e+07	6.61074e+07	8.63683e+07	7.24785e+07	6.5311e+07	1.76528e+08	1.0642e+08	6.34668e+07	2.57222e+08	2.54241e+08	3.75113e+08	6.26179e+07	1.11699e+08	2.30238e+08	3.33409e+08	1.04983e+08	1.35772e+08	4.94528e+07	4.26064e+08	5.71914e+07	7.68626e+07	4.03772e+08	192399286	2.63093e+08	1.89415e+08	4.67529e+07	5.30073e+07	2.97537e+08	4.98501e+08	2.05474e+08	536553788	6.79292e+07	2.10197e+08	4.98244e+08	7.24052e+07	1.71576e+08	2.22615e+08	0.344361
P59325	Eukaryotic translation initiation factor 5 OS=Mus musculus OX=10090 GN=Eif5 PE=1 SV=1 - [IF5_MOUSE]	94.87	1	11	51	428	2.74936e+08	2.29901e+08	9.61827e+08	2.60707e+08	2.13869e+08	3.35272e+08	1.86591e+09	8.86929e+08	4.33869e+08	1.96061e+08	2.48781e+08	2.83816e+08	9.23095e+08	3.86594e+08	3.37862e+08	2.27913e+08	2.31968e+08	2.27505e+08	1356849440	3.2018e+08	286679900	1.98287e+08	3.19768e+08	2.89588e+08	2.07237e+08	2.36879e+08	8.44234e+08	3.71088e+08	4.96749e+08	2.43758e+08	162180824	3.61877e+08	343014527	1.35756e+09	2.66672e+08	4.13026e+08	3.27368e+08	1.53511e+09	3.88248e+08	7.43607e+08	4.3603e+08	4.72883e+08	1.12307
P60761	Neurogranin OS=Mus musculus OX=10090 GN=Nrgn PE=1 SV=1 - [NEUG_MOUSE]	94.87	1	3	9	231	4.32051e+09	8.42886e+08	1447463441	2.34245e+09	1.76049e+09	2135662068	3.09126e+09	1.21447e+09	2.5335e+09	1.3588e+09	2.48329e+09	1.35739e+09	2.17903e+09	2.71471e+09	2.65855e+09	2.32255e+09	1.30558e+09	1.71983e+09	2.30366e+09	2.6426e+09	2.03907e+09	1.36501e+09	2.02103e+09	1.24457e+09	3.12375e+09	1.33759e+09	1.72929e+09	2.25226e+09	3.31468e+09	1.63927e+09	2.46551e+09	2.62497e+09	2.36836e+09	1.0748e+09	2.43114e+09	1.19124e+09	2.61343e+09	2.25893e+09	2.14276e+09	2.06674e+09	2.2786e+09	2.05885e+09	1.06339
P61358	60S ribosomal protein L27 OS=Mus musculus OX=10090 GN=Rpl27 PE=1 SV=2 - [RL27_MOUSE]	94.85	1	6	20	177	2.49082e+08	2.13817e+08	1.17966e+08	1.69899e+09	5.86355e+08	2.47754e+08	1.16666e+09	1.04292e+08	9.11678e+08	6.78218e+07	1.4877e+08	2.11945e+08	1.15977e+08	1.70713e+08	1.4862e+08	5.17313e+08	1.22465e+08	1.19318e+08	1.41628e+08	1.67573e+08	4.65954e+08	1.14704e+08	1.14446e+08	1.14581e+08	1.40828e+09	1.36857e+08	1.6308e+08	1.3842e+08	1.1083e+09	156963826	9.5061e+07	1.1846e+08	1.43882e+08	1.8728e+08	1.32075e+08	2.44729e+08	1.4057e+08	1.61426e+08	5.73242e+08	4.9964e+08	1.59205e+08	2.13659e+08	0.277728
Q9D6Y7	Mitochondrial peptide methionine sulfoxide reductase OS=Mus musculus OX=10090 GN=Msra PE=1 SV=1 - [MSRA_MOUSE]	94.85	1	8	26	139	4.40408e+07	2.46152e+06	2.93211e+07	5.02931e+07	7.9409e+07	66086799	6.83828e+07	5.54291e+07	4.5619e+07	8.71121e+07	24349445	0	4.16105e+07	4.20045e+07	7.90778e+07	3.69654e+07	2.5701e+07	101571294	9.86821e+07	1.28124e+08	1.10487e+08	3.87988e+07	40390968	2.48812e+07	2.84461e+07	3.41997e+07	31358261	1.43462e+08	7.78446e+07	0	3.65749e+07	1.02857e+08	1.09526e+08	6.7388e+07	79411547	2.19877e+08	1.4415e+08	5.42083e+07	4.11051e+07	6.4526e+07	3.74084e+07	7.82086e+07	0.910067
Q9Z0S1	3'(2'),5'-bisphosphate nucleotidase 1 OS=Mus musculus OX=10090 GN=Bpnt1 PE=1 SV=2 - [BPNT1_MOUSE]	94.81	1	14	31	315	3.74201e+08	1.61857e+08	180310122	2.06016e+08	2.61366e+08	3.02252e+08	2.93281e+08	1.84868e+08	3.63294e+08	1.55438e+08	2.91641e+08	3.01053e+08	1.74092e+08	2.62883e+08	2.01158e+08	2.20835e+08	192240100	1.96363e+08	2.29796e+08	2.72555e+08	2.03511e+08	1.88866e+08	1.91368e+08	2.02676e+08	257199620	2.08588e+08	3.01102e+08	2.25392e+08	2.21916e+08	2.40688e+08	3.22999e+08	2.33581e+08	2.33552e+08	2.48301e+08	2.32765e+08	3.28488e+08	3.13418e+08	210064488	2.3675e+08	2.59826e+08	2.46166e+08	222357685	1.03977
P35585	AP-1 complex subunit mu-1 OS=Mus musculus OX=10090 GN=Ap1m1 PE=1 SV=3 - [AP1M1_MOUSE]	94.8	2	15	51	368	1.99163e+08	1.42016e+08	1.3204e+08	1.16873e+08	6.75786e+07	2.32723e+08	2.01043e+08	9.18881e+07	1.29605e+08	1.10804e+08	1.71287e+08	1.83438e+08	108190455	1.87823e+08	1.26378e+08	1.46694e+08	1.20773e+08	1.10491e+08	157463653	2.03774e+08	1.34981e+08	1.40478e+08	9.49846e+07	6.11475e+08	1.88889e+08	1.20813e+08	1.35372e+08	1.33007e+08	1.59016e+08	1.44167e+08	1.08436e+08	1.18881e+08	1.4302e+08	153565296	1.6512e+08	1.81707e+08	1.43374e+08	1.35925e+08	1.31534e+08	1.53212e+08	1.55423e+08	1.47839e+08	1.18162
O35526	Syntaxin-1A OS=Mus musculus OX=10090 GN=Stx1a PE=1 SV=3 - [STX1A_MOUSE]	94.79	3	15	41	733	8.15481e+08	3.96788e+08	5.10147e+08	6.4765e+08	5.08823e+08	9.03226e+08	7.58451e+08	4.43291e+08	5.22217e+08	1.135e+08	8.85779e+08	1.4289e+09	7.2637e+08	8.53666e+08	6.51979e+08	5.64391e+08	200904147	7.17311e+08	2.81173e+09	8.16741e+08	2.70663e+08	1.75391e+08	2.14913e+08	7.28383e+08	2.44233e+08	765958023	7.82629e+08	3.11936e+08	2.23323e+09	1.00561e+09	6.04341e+08	6.30455e+08	5.69818e+08	1.3927e+09	7.40529e+08	9.41998e+08	7.78967e+08	8.99873e+08	5.75778e+08	5.48137e+08	9.09339e+08	1.02222e+09	1.57932
Q8R1N4	NudC domain-containing protein 3 OS=Mus musculus OX=10090 GN=Nudcd3 PE=1 SV=3 - [NUDC3_MOUSE]	94.77	1	14	35	333	2.99545e+08	1.35917e+08	2.85225e+08	1.35838e+08	1.23885e+08	2.48866e+08	1.3268e+08	9.97329e+07	1.70201e+08	4.66069e+07	250410442	4.72408e+08	256392377	1.28644e+08	6.09731e+07	8.886e+07	3.25119e+08	3.38971e+08	1.11828e+08	1.30971e+08	339303007	331184407	2.50648e+08	1.46823e+08	229177269	3.76116e+08	1.0994e+08	6.62032e+07	2.88845e+08	4.34362e+08	2.96694e+08	2.85972e+08	5.82064e+07	4.15577e+08	1.53088e+08	1.72035e+08	1.24575e+08	1.53056e+08	1.96082e+08	1.39617e+08	2.33766e+08	1.9915e+08	1.19218
P62761	Visinin-like protein 1 OS=Mus musculus OX=10090 GN=Vsnl1 PE=1 SV=2 - [VISL1_MOUSE]	94.76	1	13	34	1076	3246578706	1.45636e+09	1.12145e+09	1785431045	1.22291e+09	2.5034e+09	2.04423e+09	1.293e+09	1.68306e+09	7.92837e+08	1.78813e+09	2.88499e+09	3.1473e+09	2.04468e+09	1.8101e+09	1.34182e+09	1.49115e+09	1.37264e+09	1.78966e+09	2.05359e+09	2.90906e+09	1.82622e+09	1.26971e+09	2.09112e+09	1.43772e+09	1.25487e+09	2.65055e+09	1.87742e+09	1795997835	2.84525e+09	2.5459e+09	1.90328e+09	2.19646e+09	2.89142e+09	1.5258e+09	3.3706e+09	3.40153e+09	2282798397	1.76655e+09	1.66331e+09	2.33504e+09	1.60977e+09	1.32181
P30416	Peptidyl-prolyl cis-trans isomerase FKBP4 OS=Mus musculus OX=10090 GN=Fkbp4 PE=1 SV=5 - [FKBP4_MOUSE]	94.76	1	19	69	416	176610598	129189402	1.32586e+08	1.03965e+08	7.33634e+07	1.61068e+08	1.51767e+08	8.89292e+07	9.39432e+07	7.80807e+07	1.43004e+08	2.3536e+08	9.53114e+07	1.40031e+08	1.28373e+08	1.15743e+08	1.01262e+08	8.35111e+07	1.386e+08	1.67848e+08	1.68223e+08	1.1627e+08	9.74033e+07	7.11436e+07	1.1441e+08	1.55495e+08	2.12618e+08	1.17648e+08	1.43165e+08	239235481	9.64929e+07	1.0422e+08	1.55079e+08	2.18778e+08	1.08186e+08	2.54606e+08	1.33972e+08	1.60076e+08	1.23143e+08	1.14758e+08	1.48416e+08	1.21393e+08	1.20523
P47955	60S acidic ribosomal protein P1 OS=Mus musculus OX=10090 GN=Rplp1 PE=1 SV=1 - [RLA1_MOUSE]	94.74	1	2	7	126	5.97577e+08	4.84321e+08	3.67181e+08	539740193	597155861	8.21301e+07	6.52302e+08	6.41394e+08	5.96216e+08	246517208	132789952	1526340020	7.31428e+08	7.95817e+08	552773293	5.25884e+08	5.58575e+08	4.61965e+08	5.73012e+08	744991970	3.14362e+08	3.61539e+08	4.07446e+08	568704579	4.57682e+08	6.08018e+08	1.01561e+09	512564786	6.80924e+08	5.64641e+08	7.87624e+08	4.8595e+08	627528825	5.77268e+08	4.54337e+08	1.19906e+09	4.55526e+08	7.45862e+08	5.17195e+08	4.43712e+08	7.4783e+08	5.72886e+08	1.44593
Q61081	Hsp90 co-chaperone Cdc37 OS=Mus musculus OX=10090 GN=Cdc37 PE=1 SV=1 - [CDC37_MOUSE]	94.72	1	14	56	518	6.9726e+08	726549325	2.43366e+08	5.06028e+08	344657280	1.1779e+09	6.12608e+08	2.84e+08	1.89254e+08	3.79508e+08	3.35081e+08	404738952	5.3485e+08	6.45126e+08	2.9562e+08	2.55295e+08	1.98889e+08	1.23903e+08	567218900	7.0858e+08	5.82569e+08	2.60701e+08	1.2094e+08	8.16058e+08	5.34975e+08	719785261	9.89759e+08	6.1857e+08	6.9045e+08	241222040	1.53818e+08	175039641	4.16264e+08	2.46697e+08	5.81471e+08	1.40442e+09	5.3924e+08	9.99959e+08	5.03572e+08	5.28654e+08	4.43083e+08	3.70777e+08	0.87988
Q8BK64	Activator of 90 kDa heat shock protein ATPase homolog 1 OS=Mus musculus OX=10090 GN=Ahsa1 PE=1 SV=2 - [AHSA1_MOUSE]	94.67	2	16	40	402	475238256	2.98417e+08	1.81502e+08	2.95852e+08	248092718	4.3896e+08	447071058	3.03914e+08	3.09273e+08	1.92762e+08	4.58435e+08	5.60233e+08	2.58142e+08	4.19676e+08	3.91449e+08	3.88836e+08	324500439	303401444	3.33296e+08	4.4055e+08	3.39572e+08	3.736e+08	2.73721e+08	2.93277e+08	4.02191e+08	376893258	4.07187e+08	309150407	4.16022e+08	454366336	3.0417e+08	3.69372e+08	4.10789e+08	4.65466e+08	4.0696e+08	572070925	3.34062e+08	3.80887e+08	2.9982e+08	3.38396e+08	4.17587e+08	3.58117e+08	1.39279
P83940	Elongin-C OS=Mus musculus OX=10090 GN=Eloc PE=1 SV=1 - [ELOC_MOUSE]	94.64	1	7	11	231	3.80932e+08	1.97184e+08	1.8762e+08	2.19362e+08	1.65327e+08	3.64939e+08	326820504	2.56728e+08	2.41019e+08	1.54232e+08	3.09322e+08	380524372	1.20854e+08	3.18702e+08	2.66816e+08	2.42379e+08	2.4448e+08	2.02765e+08	1.47448e+08	3.11722e+08	2.24397e+08	2.42218e+08	1.03633e+08	2.41025e+08	2.85455e+08	2.82236e+08	3.67166e+08	8.95742e+07	3.11801e+08	2.6946e+08	2.21709e+08	2.74517e+08	3.10175e+08	2.09957e+08	1.29814e+08	2.10122e+08	1.40168e+08	2.3068e+08	2.30085e+08	2.68748e+08	2.79244e+08	2.29759e+08	1.21366
Q8VC30	Triokinase/FMN cyclase OS=Mus musculus OX=10090 GN=Tkfc PE=1 SV=1 - [TKFC_MOUSE]	94.64	1	7	59	195	1.42575e+08	3.78084e+08	3.34252e+08	1.74979e+07	6.21011e+07	1.5957e+08	2.85442e+07	2.30858e+07	4.35652e+07	5.12893e+07	5.87234e+08	35699763	4.15994e+07	2.90681e+06	7.57966e+07	1.11877e+09	2.40718e+07	1.08069e+09	2.53112e+07	7.53062e+07	3.44037e+07	2.19058e+07	2.11352e+07	5.21338e+07	2.09265e+08	5.55742e+08	5.38851e+07	1.37226e+08	3.06596e+07	4.88917e+08	4.56025e+08	8.34501e+07	8.88357e+07	3.91567e+07	3.51272e+07	9.04656e+06	8.22688e+07	9.78789e+08	1.86902e+08	6.1211e+07	1.48647e+08	4.6483e+08	0.795322
P10630	Eukaryotic initiation factor 4A-II OS=Mus musculus OX=10090 GN=Eif4a2 PE=1 SV=2 - [IF4A2_MOUSE]	94.59	1	12	57	1194	1.3187e+09	9.17979e+08	7.92568e+08	978521193	6.77416e+08	1.39488e+09	1.29562e+09	1039573308	8.95942e+08	5.59398e+08	1.10778e+09	1.47262e+09	9.10516e+08	1.17977e+09	9.59145e+08	9.8652e+08	1.008e+09	8.42505e+08	1067387575	1186736064	8.76701e+08	951713086	805912328	1.10199e+09	1.02688e+09	1208963646	1.51322e+09	994993761	1207119628	1.08186e+09	7.85691e+08	9.58443e+08	1.05809e+09	1.39979e+09	1.09548e+09	1903784914	1.10298e+09	1.31882e+09	9.37038e+08	1.03708e+09	1.12597e+09	1.01823e+09	1.20162
P06151	L-lactate dehydrogenase A chain OS=Mus musculus OX=10090 GN=Ldha PE=1 SV=3 - [LDHA_MOUSE]	94.58	2	29	46	2076	5.86618e+09	2.26057e+09	2.25638e+09	2.92801e+09	2.04449e+09	4.159e+09	4.29489e+09	2.51713e+09	3.02687e+09	2.71455e+09	4.44021e+09	4.00261e+09	2675017731	3.97434e+09	2.94799e+09	3.06808e+09	2.29527e+09	2.62309e+09	3.5001e+09	4.75771e+09	2.64641e+09	2420265757	2.62021e+09	2.83609e+09	4.04001e+09	3.18794e+09	4.06826e+09	3.26073e+09	4.17157e+09	3.15103e+09	2.62692e+09	2.72705e+09	3.93384e+09	4.16472e+09	3.85285e+09	4.76864e+09	4.02853e+09	3.90886e+09	3.07113e+09	3342487654	3.60803e+09	3.24885e+09	1.17482
O08807	Peroxiredoxin-4 OS=Mus musculus OX=10090 GN=Prdx4 PE=1 SV=1 - [PRDX4_MOUSE]	94.53	1	3	30	154	6.81298e+08	498004738	3.79664e+08	2.98159e+08	2.99283e+08	1331831570	5.85985e+08	3.32541e+08	1089517496	563272724	3.85003e+08	1.24274e+09	791180838	1.4611e+09	8.21818e+08	2.96425e+08	1703461414	765790410	8.34663e+08	1.03258e+09	4.26557e+08	4.63956e+08	4.30007e+08	8.78519e+08	3.58021e+08	4.09579e+08	1.64968e+09	9.20964e+08	1.50343e+09	4.13465e+08	2.87733e+08	927645279	1.41034e+09	7.7465e+08	9.75856e+08	1.27993e+09	1352597006	9.85382e+08	4.31282e+08	7.8063e+08	9.40368e+08	9.26584e+08	2.1804
O35593	26S proteasome non-ATPase regulatory subunit 14 OS=Mus musculus OX=10090 GN=Psmd14 PE=1 SV=2 - [PSDE_MOUSE]	94.52	1	11	33	502	2.42882e+08	2.01795e+08	1.6171e+08	2.97201e+08	1.77308e+08	2.42047e+08	2.57455e+08	2.35396e+08	2.07848e+08	1.32074e+08	2.27924e+08	2.62529e+08	1.70619e+08	2.47676e+08	2.84682e+08	1.93417e+08	1.50182e+08	1.91404e+08	2.20785e+08	4.92124e+08	162954675	1.70023e+08	2.16127e+08	2.26299e+08	2.5295e+08	2.49756e+08	3.91443e+08	2.85114e+08	3.95348e+08	3.8119e+08	1.61981e+08	2.47164e+08	2.70204e+08	3.01323e+08	2.23343e+08	4.34507e+08	4.47347e+08	2.37987e+08	2.16179e+08	2.14964e+08	2.38686e+08	2.49582e+08	1.10411
Q8BKE9	Intraflagellar transport protein 74 homolog OS=Mus musculus OX=10090 GN=Ift74 PE=1 SV=2 - [IFT74_MOUSE]	94.5	1	1	95	670	1528155328	5.33249e+08	4.36266e+08	2.88996e+08	5.02227e+08	6.01829e+08	4.1945e+08	2.68744e+08	677602384	4.72209e+08	9.45144e+08	1.22598e+08	6.64812e+08	7.07554e+08	9.02513e+08	1.29978e+09	4.05192e+08	1.05195e+09	415190828	7.28233e+08	2.77284e+08	5.65304e+08	3.06003e+08	800187572	4.84953e+08	7.21595e+08	4.61435e+08	6.75947e+08	1.00729e+08	6.88132e+08	4.88097e+08	7.04873e+08	4.11379e+08	2.86948e+08	3.28861e+08	853786482	8.78324e+08	359972015	6.57779e+08	4.87967e+08	6.68524e+08	7.80069e+08	1.01634
Q3UHX2	28 kDa heat- and acid-stable phosphoprotein OS=Mus musculus OX=10090 GN=Pdap1 PE=1 SV=1 - [HAP28_MOUSE]	94.48	1	8	33	210	2.83782e+08	1.91387e+07	4.747e+07	5.98809e+07	9.36479e+07	9.75834e+07	1.53595e+08	4.10319e+07	2.79667e+07	3.97453e+07	4.48598e+07	6.87536e+07	5.36866e+07	2.19037e+08	9.48159e+07	106185535	4.91824e+07	5.21992e+07	2.57385e+08	7.98243e+07	7.06264e+07	5.81544e+07	6.97036e+07	4.2978e+07	1.15318e+08	8.13272e+07	1.6799e+08	6.15167e+07	1.95686e+08	8.41224e+07	5.26432e+07	2.40186e+08	2.77625e+08	1.07921e+08	5.78817e+07	1.40081e+08	1.84701e+08	253688757	1.00784e+08	7.19845e+07	9.62306e+07	1.08955e+08	0.954822
Q9DB27	Malignant T-cell-amplified sequence 1 OS=Mus musculus OX=10090 GN=Mcts1 PE=1 SV=1 - [MCTS1_MOUSE]	94.48	2	6	27	234	3.74003e+08	1.15844e+09	4.08116e+07	5.34368e+07	5.50144e+07	3.07045e+08	1.21608e+08	6.02713e+07	1.28475e+08	4.0097e+07	76811404	1.55543e+08	9.53178e+07	1.8641e+09	7.29419e+07	7.31673e+07	2.14461e+08	8.65178e+07	1.57251e+09	1.69882e+09	2.0685e+08	1.36432e+09	7.88152e+07	5.32824e+07	6.64579e+07	1.47083e+08	135868893	9.97745e+07	91087559	1.38566e+09	6.6829e+07	1.16836e+09	1.34268e+08	7.65808e+07	1.56987e+08	1.53391e+08	7.49353e+07	8.98113e+07	3.3634e+08	1.31499e+08	4.52943e+08	7.29094e+08	1.34668
P54071	Isocitrate dehydrogenase [NADP], mitochondrial OS=Mus musculus OX=10090 GN=Idh2 PE=1 SV=3 - [IDHP_MOUSE]	94.47	1	16	55	598	4.38515e+08	2.42243e+08	2.00463e+08	3.59407e+08	1.88836e+08	4.89248e+08	4.65409e+08	3.14253e+08	262868225	1.78848e+08	408634809	3.61678e+08	3.12286e+08	3.53331e+08	3.00749e+08	4.0698e+08	2.30666e+08	2.90355e+08	2.56624e+08	2.98929e+08	2.57983e+08	2.19597e+08	3.33558e+08	2.8103e+08	3.46549e+08	2.93688e+08	458081321	2.75062e+08	2.76757e+08	2.9667e+08	3.12876e+08	3.72912e+08	2.61503e+08	3.5499e+08	240041301	6.62615e+08	3.44825e+08	2.70327e+08	2.85893e+08	3.42125e+08	3.47336e+08	2.96711e+08	1.21492
P14148	60S ribosomal protein L7 OS=Mus musculus OX=10090 GN=Rpl7 PE=1 SV=2 - [RL7_MOUSE]	94.44	2	19	59	531	3.61365e+08	2.10272e+08	2.25566e+08	2.77774e+08	7.44067e+08	2.53108e+08	3.42898e+08	2.57512e+08	2.64779e+08	1.87328e+08	2.45457e+08	3.84119e+08	2.20421e+08	3.53764e+08	2.74765e+08	2.19672e+08	2.22042e+08	288192882	303777034	3.75724e+08	1.95055e+08	2.42632e+08	2.21345e+08	2.92141e+08	1.98119e+08	2.9948e+08	4.13022e+08	2.29255e+08	3.23394e+08	2.75139e+08	1.9909e+08	2.37897e+08	2.6461e+08	4.33048e+08	2.74305e+08	5.11925e+08	3.30908e+08	3.29921e+08	3.63809e+08	2.61125e+08	2.95705e+08	2.81882e+08	0.812804
Q8BH44	Coronin-2B OS=Mus musculus OX=10090 GN=Coro2b PE=1 SV=2 - [COR2B_MOUSE]	94.38	1	14	47	290	6.84696e+08	1.06311e+08	1.24428e+08	1.71136e+08	1.14996e+08	235136712	2.16926e+08	9.56219e+07	1.92879e+08	9.89587e+07	110359419	2.16223e+08	1.5453e+08	2.01988e+08	1.66157e+08	1.71246e+08	1.36783e+08	1.23808e+08	147823892	2.11213e+08	1.7463e+08	1.563e+08	2.41448e+08	1.34323e+08	1.35843e+08	1.81638e+08	2.20054e+08	2.14231e+08	2.12984e+08	1.0967e+08	101727768	1.79322e+08	1.99147e+08	1.62548e+08	1.21375e+08	1.85962e+08	1.61114e+08	2.24243e+08	2.40314e+08	1.67905e+08	1.69851e+08	1.58175e+08	0.706791
P47915	60S ribosomal protein L29 OS=Mus musculus OX=10090 GN=Rpl29 PE=1 SV=2 - [RL29_MOUSE]	94.38	1	3	38	150	9.11804e+08	3.74966e+07	5.73122e+07	6.57406e+07	3.13981e+07	5.43232e+07	5.74909e+07	76706392	1.6341e+08	7.44958e+06	4.80094e+07	8.27787e+07	6.02204e+07	4.48985e+07	6.20966e+07	6.23538e+07	4.39066e+07	1.02967e+09	5.52404e+08	8.70741e+08	1.93297e+08	1.07701e+08	9.1904e+08	8.49328e+07	5.86711e+07	7.43736e+07	1.03585e+08	1.18684e+08	1.87861e+08	6.66261e+07	5.55016e+07	1.1332e+09	8.69533e+08	6.08916e+07	3.4459e+07	1.99567e+08	7.52386e+07	4.20723e+07	2.2075e+08	7.1876e+07	5.96007e+07	5.11814e+08	0.269991
Q9CQI6	Coactosin-like protein OS=Mus musculus OX=10090 GN=Cotl1 PE=1 SV=3 - [COTL1_MOUSE]	94.37	1	13	21	589	4.78931e+09	4.26976e+08	4.27306e+08	533064596	3.41073e+08	4.27149e+09	723768981	6.02676e+08	6.3774e+08	4.50668e+08	4.02639e+09	7.38959e+08	5.01701e+08	7.23619e+08	5.41584e+08	2.82096e+09	4.9118e+08	4.61842e+08	6.71834e+08	7.06294e+08	2.59919e+09	520453825	4.37061e+08	5.79977e+08	6.27526e+08	5.245e+08	896557961	6.03996e+08	6.95538e+08	617311891	4.29028e+08	528942810	6.64326e+08	6.31911e+08	5.09673e+08	9.40116e+08	7.90181e+08	8.00498e+08	1.30355e+09	1.33727e+09	1.30645e+09	1.03042e+09	1.00223
Q6ZWX6	Eukaryotic translation initiation factor 2 subunit 1 OS=Mus musculus OX=10090 GN=Eif2s1 PE=1 SV=3 - [IF2A_MOUSE]	94.29	1	15	56	362	2.25386e+08	117127886	1.66266e+08	1.04485e+08	5.56591e+07	1.82139e+08	6.07667e+08	1.06026e+09	9.07748e+07	9.34221e+07	5.7676e+08	2.33746e+08	1.55558e+08	1.84435e+08	1.86916e+08	1.65697e+08	3.70728e+08	1.08361e+08	1.22171e+08	1.75397e+08	1.03176e+08	1.0927e+08	205686097	1.34806e+08	2.07272e+08	1.66807e+08	4.12129e+08	3.97932e+08	1.40122e+08	1.54485e+08	1.06971e+08	1.1076e+08	1.44297e+08	2.19625e+09	1.43174e+08	2.29727e+08	1.36944e+08	1.64948e+08	1.33785e+08	4.06853e+08	2.67483e+08	1.88471e+08	1.99935
Q8BWY3	Eukaryotic peptide chain release factor subunit 1 OS=Mus musculus OX=10090 GN=Etf1 PE=1 SV=4 - [ERF1_MOUSE]	94.28	1	9	46	262	77179142	5.67294e+07	4.38742e+07	8.81752e+07	7.33521e+07	6.4856e+07	7.608e+07	1.41539e+08	1.09339e+08	5.34537e+07	1.08307e+08	8.76393e+07	1.168e+08	6.34327e+07	139848314	6.19271e+07	8.32777e+07	2.70833e+08	6.223e+07	109614457	2.8864e+07	7.57301e+07	1.34427e+08	5.36303e+07	4.67157e+07	1.13578e+08	1.26255e+08	4.42389e+07	1.16582e+08	5.51175e+07	8.44344e+07	1.05067e+08	124096973	104268150	6.72952e+07	1.60848e+08	1.46101e+08	1.04525e+08	6.7862e+07	8.90537e+07	1.03205e+08	1.17577e+08	1.52081
Q8BWG8	Beta-arrestin-1 OS=Mus musculus OX=10090 GN=Arrb1 PE=1 SV=1 - [ARRB1_MOUSE]	94.26	3	13	44	331	2.0035e+08	1.07741e+08	1.41396e+08	2.14214e+08	1.40428e+08	1.58765e+08	2.85679e+08	1.41592e+08	149377091	9.7183e+07	1.55064e+08	1.41194e+08	1.77393e+08	1.96498e+08	3.80049e+08	2.01156e+08	8.13571e+07	2.04662e+08	1.36963e+08	2.05474e+08	1.12416e+08	1.15857e+08	2.07229e+08	1.26821e+08	1.90427e+08	2.04192e+08	1.55755e+08	2.27705e+08	2.21474e+08	2.2792e+08	1.66203e+08	2.95863e+08	175645919	1.043e+08	2.97401e+08	1.80099e+08	1.28161e+08	1.73559e+08	1.60826e+08	1.66519e+08	2.10039e+08	1.65922e+08	1.30601
P31786	Acyl-CoA-binding protein OS=Mus musculus OX=10090 GN=Dbi PE=1 SV=2 - [ACBP_MOUSE]	94.25	1	7	14	414	2.18431e+09	1.2373e+09	1.35058e+09	1.42415e+09	9.78771e+08	1972086512	2.17978e+09	1.66417e+09	1.54051e+09	1.23269e+09	1.90799e+09	2.35e+09	1.28788e+09	1847366246	1.60135e+09	1.786e+09	1.78684e+09	1.63146e+09	1.64322e+09	2.32672e+09	1170880362	1.24925e+09	1754846935	6.16951e+08	1.57971e+09	1.71787e+09	2.06184e+09	1.8352e+09	2.45213e+09	1.63656e+09	1.19743e+09	1814358080	1.79249e+09	2.27053e+09	1880082559	3.22586e+09	1867303643	8.72983e+08	1.43502e+09	1.71785e+09	1.79892e+09	1.83485e+09	1.25358
Q9D0E1	Heterogeneous nuclear ribonucleoprotein M OS=Mus musculus OX=10090 GN=Hnrnpm PE=1 SV=3 - [HNRPM_MOUSE]	94.24	1	35	147	1287	4.95346e+08	1.35052e+09	3.04689e+09	1.66475e+09	2.07521e+09	6.64449e+08	1.8878e+09	4.77426e+08	3.36922e+09	1.84547e+09	6.8439e+08	2.24895e+09	1.10336e+09	1.37611e+09	2.85182e+09	4.09851e+08	1.03918e+09	3.38354e+09	4169629978	3.75824e+09	1.17483e+09	1.20023e+09	2.63194e+09	8.52307e+09	3747610562	1.31142e+09	2.06527e+09	6.92231e+08	5.39534e+08	1.47456e+09	3.45736e+08	1.75447e+09	7.43744e+08	7224206843	480072961	2.92208e+09	6.18465e+08	5.1396e+09	1.72654e+09	1.64887e+09	1.65293e+09	2.55209e+09	0.957362
P11983	T-complex protein 1 subunit alpha OS=Mus musculus OX=10090 GN=Tcp1 PE=1 SV=3 - [TCPA_MOUSE]	94.24	1	29	65	1159	6.85524e+08	3.08705e+08	2.19354e+08	2.72118e+08	2.22012e+08	3.9502e+08	3.59896e+08	3.15931e+08	2.60709e+08	3.97955e+08	3.57348e+08	4.5469e+08	2.43842e+08	3.64204e+08	3.04272e+08	2.85261e+08	7.1905e+08	2.59219e+08	3.20593e+08	3.60091e+08	265980433	3.02734e+08	3.18177e+08	3.37355e+08	3.01176e+08	3.62394e+08	4.39574e+08	3.62849e+08	4.18213e+08	3.66946e+08	2.49577e+08	317868000	5.95233e+08	9.71169e+08	3.24686e+08	5.10578e+08	7.67985e+08	7.19164e+08	3.41543e+08	3.45902e+08	3.44871e+08	3.88843e+08	1.00975
P62983	Ubiquitin-40S ribosomal protein S27a OS=Mus musculus OX=10090 GN=Rps27a PE=1 SV=2 - [RS27A_MOUSE]	94.23	4	15	29	927	8067072672	2.52291e+09	3.16122e+09	4.03175e+09	2.86932e+09	4.50309e+09	6.38747e+09	3.56079e+09	4.75332e+09	3.89575e+09	5.49164e+09	6.48778e+09	2.76268e+09	4.32854e+09	6.04123e+09	5.90926e+09	4.97857e+09	3.52641e+09	3.79762e+09	4.51392e+09	3.88748e+09	2.88787e+09	3.27022e+09	3.78131e+09	4.0997e+09	3.59372e+09	6.07986e+09	4.40918e+09	5.116e+09	2.98207e+09	2.58561e+09	4.62935e+09	3.51419e+09	3789043428	4909841366	7.60685e+09	4.73675e+09	3.33245e+09	4.13046e+09	4.62008e+09	5.02237e+09	4.54516e+09	1.21594
P60840	Alpha-endosulfine OS=Mus musculus OX=10090 GN=Ensa PE=1 SV=1 - [ENSA_MOUSE]	94.21	1	8	22	405	7.60019e+08	3.73507e+08	364178829	5.52773e+08	4.03646e+08	739011485	6.91178e+08	4.55192e+08	5.92469e+08	3.71933e+08	6.11708e+08	7.38181e+08	4.14637e+08	7.43499e+08	5.23917e+08	4.90996e+08	5.48411e+08	3.42665e+08	6.73565e+08	6.56702e+08	4.60699e+08	5.15798e+08	4.10588e+08	4.41247e+08	5.5889e+08	5.04447e+08	5.37194e+08	5.43264e+08	6.62141e+08	5.84085e+08	4.17001e+08	5.13015e+08	644498348	625346873	5.26433e+08	8.75707e+08	6.49358e+08	6.30969e+08	4.90825e+08	5.69957e+08	6.06388e+08	5.42468e+08	1.23545
P50247	Adenosylhomocysteinase OS=Mus musculus OX=10090 GN=Ahcy PE=1 SV=3 - [SAHH_MOUSE]	94.21	1	17	52	577	4.59999e+08	2.15151e+08	2.89267e+08	3.39031e+08	2.02184e+08	8.498e+08	425069360	240368869	3.74693e+08	1.76657e+08	3.86133e+08	3.62757e+08	3.47854e+08	9.94973e+08	307692370	235744949	250519450	2.91533e+08	3.76563e+08	4.61722e+08	3.27775e+08	2.56377e+08	3.09683e+08	3.29704e+08	3.19242e+08	2.86533e+08	4.3222e+08	382809953	7.56136e+08	3.01814e+08	2.36796e+08	8.60495e+08	3.88683e+08	1407593089	2.54264e+08	1.21481e+09	3.89108e+08	4.46334e+08	3.01126e+08	4.13318e+08	4.79882e+08	3.23216e+08	1.59362
P32921	Tryptophan--tRNA ligase, cytoplasmic OS=Mus musculus OX=10090 GN=Wars1 PE=1 SV=2 - [SYWC_MOUSE]	94.18	1	23	68	548	2.82729e+08	4.45989e+08	1.9348e+08	2.47006e+08	1.8433e+08	2.72681e+08	2.91292e+08	2.31796e+08	247597550	1.93378e+08	2.80843e+08	3.13408e+08	2.36585e+08	3.07209e+08	2.75461e+08	2.15251e+08	3.72908e+08	2.21178e+08	2.85571e+08	3.05902e+08	1.87137e+08	2.33393e+08	231581374	2.31269e+08	2.57638e+08	2.49308e+08	2.57e+08	2.5946e+08	2.66026e+08	2.8927e+08	2.09622e+08	184309988	3.13133e+08	3.16762e+08	2.20765e+08	3.41646e+08	2.65326e+08	2.39313e+08	2.70707e+08	2.47349e+08	2.82701e+08	2.80162e+08	1.04431
Q9DCL8	Protein phosphatase inhibitor 2 OS=Mus musculus OX=10090 GN=Ppp1r2 PE=1 SV=3 - [IPP2_MOUSE]	94.17	1	6	24	141	9.00545e+07	7.91088e+07	7.36292e+07	7.21649e+07	0	1.05249e+08	1.48229e+08	1.51471e+08	6.7955e+07	4.75579e+07	1.21196e+08	1.53169e+08	5.12911e+07	8.36571e+07	8.24216e+07	8.25962e+07	9.14828e+07	1.81621e+08	7.64981e+07	9.2019e+07	7.67772e+07	86180332	7.90895e+07	1.64588e+08	9.33692e+07	1.20515e+08	1.11732e+08	8.84214e+07	1.20242e+08	1.06456e+08	6.9004e+07	7.31493e+07	72029590	2.70952e+08	7.77919e+07	1.80172e+08	8.22276e+07	7.17573e+07	6.29915e+07	1.04092e+08	9.83469e+07	1.04843e+08	1.56127
Q61249	Immunoglobulin-binding protein 1 OS=Mus musculus OX=10090 GN=Igbp1 PE=1 SV=1 - [IGBP1_MOUSE]	94.12	2	7	37	189	1.01701e+08	8.38427e+07	4.46318e+07	1.37547e+07	1.11782e+07	1.07502e+08	187000132	2.59613e+07	3.08979e+07	3.07299e+07	1.20477e+08	2.87146e+07	3.89509e+07	88476009	3.84789e+07	4.67379e+07	1.01463e+07	2.97767e+07	1.37542e+07	1.22997e+07	1.12173e+08	4.55121e+07	2.6218e+07	4.30638e+07	7.74626e+07	1.32422e+08	5.26501e+07	3.51708e+07	8.65231e+07	1.17379e+08	1.86918e+07	7.87516e+07	116525068	166318468	18755221	5.66459e+07	7.98236e+06	1.00156e+08	5.10217e+07	7.64183e+07	6.30194e+07	2.2543e+07	1.23515
O89086	RNA-binding protein 3 OS=Mus musculus OX=10090 GN=Rbm3 PE=1 SV=1 - [RBM3_MOUSE]	94.12	1	5	23	281	3.38884e+08	2.45725e+08	1.34945e+08	228839480	1.11227e+08	3.26298e+08	4.27498e+08	1.96936e+08	3.32014e+08	1.25459e+08	2.396e+08	2.78163e+08	281070097	3.0692e+08	2.61611e+08	3.70385e+08	2.45438e+08	2.93291e+08	284399563	3.20719e+08	1.93251e+08	2.16241e+08	2.47357e+08	1.64929e+08	2.81726e+08	2.0331e+08	3.45606e+08	2.92593e+08	3.26628e+08	2.58506e+08	170164715	2.37198e+08	2.72919e+08	3.63511e+08	3.30511e+08	4.47379e+08	1.96744e+08	3.33694e+08	2.11924e+08	2.81641e+08	2.73473e+08	3.02847e+08	1.29043
P61089	Ubiquitin-conjugating enzyme E2 N OS=Mus musculus OX=10090 GN=Ube2n PE=1 SV=1 - [UBE2N_MOUSE]	94.08	2	10	18	459	1777383626	1.19173e+09	8.54048e+08	1.1113e+09	838623406	1.83379e+09	1.8815e+09	1.35272e+09	1.21748e+09	7.74902e+08	1.35653e+09	2116807943	1.14084e+09	1.43458e+09	1.14186e+09	1.20011e+09	1250393181	1.11478e+09	1.02731e+09	1.19035e+09	1.00006e+09	1.12544e+09	9.85047e+08	1.2782e+09	1.20608e+09	1.47294e+09	1.99822e+09	1285325365	1457044459	1.4268e+09	8.42091e+08	1.24977e+09	1.40192e+09	1.68331e+09	1256141458	2.298e+09	1.20357e+09	1.2924e+09	1.15462e+09	1.41208e+09	1.43812e+09	1.15659e+09	1.24554
P14824	Annexin A6 OS=Mus musculus OX=10090 GN=Anxa6 PE=1 SV=3 - [ANXA6_MOUSE]	94.06	2	40	105	822	9.90228e+08	8.06236e+08	7.34477e+08	1.45805e+09	949161326	3044900764	1.03984e+09	2025179091	5.51744e+08	6.70657e+08	1.57253e+08	1.35096e+09	2.13399e+09	1.55626e+09	1238508100	6.99338e+07	7.62275e+08	1.20952e+09	1.02293e+09	2.32216e+09	1.15833e+08	8.03452e+08	1690868122	1.31784e+09	9.84348e+08	5.04574e+08	2050588011	1.09929e+09	1.07894e+09	1.25852e+09	4.71238e+08	7.07818e+08	1.69286e+09	1.22006e+09	1.01512e+09	2.20275e+09	1.42389e+09	1.48422e+09	9.8763e+08	1.46646e+09	1.28739e+09	1.07736e+09	1.30352
P19246	Neurofilament heavy polypeptide OS=Mus musculus OX=10090 GN=Nefh PE=1 SV=3 - [NFH_MOUSE]	94.04	1	16	183	1045	4.65552e+08	1.66526e+08	338501164	4.67433e+08	7.35256e+08	241603079	1.0757e+09	3.6426e+08	4.92877e+08	193562683	348242431	6.37928e+08	6.43059e+08	4.33149e+08	4.30306e+08	1.91396e+08	3.51903e+08	374234288	1.99798e+09	2.47246e+09	3.13401e+08	3.77387e+08	3.16741e+08	2.00225e+09	5.53748e+08	5.3429e+08	5.12052e+08	1.85044e+09	2.89226e+08	5.68086e+08	3.11808e+08	3.64679e+08	3.57258e+08	580944660	6.19156e+08	8.15092e+08	6.0508e+08	3.27679e+08	4.34654e+08	4.736e+08	4.98537e+08	1077596043	1.14697
Q64674	Spermidine synthase OS=Mus musculus OX=10090 GN=Srm PE=1 SV=1 - [SPEE_MOUSE]	94.04	1	15	28	375	1.75488e+08	1.52524e+08	1.04101e+08	1.26701e+08	3.76013e+08	1.80704e+08	172537262	1.52298e+08	1.37125e+08	6.39584e+07	145189339	2.28629e+08	1.1924e+08	1.6806e+08	1.49052e+08	8.46794e+07	1.268e+08	1.19712e+08	1.58628e+08	350323173	4.63305e+08	1.50754e+08	1.17591e+08	1.64177e+08	1.4867e+08	1.71412e+08	1.64455e+08	1.40375e+08	1.61481e+08	1.85562e+08	1.10777e+08	2.49394e+08	360449906	2.06631e+08	1.70838e+08	2.66694e+08	1.58999e+08	1.82399e+08	1.86966e+08	1.41325e+08	1.62034e+08	1.68029e+08	0.86665
P48722	Heat shock 70 kDa protein 4L OS=Mus musculus OX=10090 GN=Hspa4l PE=1 SV=2 - [HS74L_MOUSE]	94.03	1	41	111	1653	7.28498e+08	3.40953e+08	2.7372e+08	1.29165e+09	8.89152e+08	5.22615e+08	2128142561	452656164	3.46001e+08	1.22556e+09	4.81586e+08	5.31847e+08	2.86674e+08	4.32773e+08	1.14899e+09	1.36216e+09	3.43687e+08	3.43239e+08	4.09432e+08	1.76376e+09	1.10008e+09	300972883	3.10318e+08	3.75759e+08	4.83413e+08	1.54091e+09	1.79964e+09	3.79832e+08	4.5637e+08	4.22291e+08	1.19602e+09	1.19878e+09	1.4168e+09	580803875	1.7394e+09	6.57611e+08	1.9416e+09	4.83549e+08	7.04795e+08	9.34996e+08	5.76375e+08	8.44456e+08	0.817791
Q99K51	Plastin-3 OS=Mus musculus OX=10090 GN=Pls3 PE=1 SV=3 - [PLST_MOUSE]	93.97	1	29	86	805	2.78496e+08	4.80691e+08	2.24416e+08	4.69258e+08	3.46324e+08	4.41249e+08	4.83762e+08	3.77703e+08	6.25584e+08	1.59263e+08	2.25778e+08	569160505	3.39695e+08	4.12454e+08	2052957368	4.2727e+08	310127785	3.47181e+08	512295655	9.03859e+08	2.74116e+08	4.84867e+08	2.82349e+08	2.7918e+08	2.57749e+08	4.88537e+08	3.07148e+08	494285645	5.84595e+08	5.97155e+08	3.24215e+08	4.25333e+08	333898702	4.51874e+08	3.0659e+08	8.12253e+08	856399827	4.03088e+08	3.59837e+08	4.17512e+08	7.20009e+08	5.00147e+08	2.00093
P14685	26S proteasome non-ATPase regulatory subunit 3 OS=Mus musculus OX=10090 GN=Psmd3 PE=1 SV=3 - [PSMD3_MOUSE]	93.96	1	23	78	748	1.65456e+09	2.02475e+08	4.4692e+08	1.24498e+09	8.11665e+08	1456065634	5.33555e+08	1810920174	1.27104e+09	7.76628e+08	1.50389e+09	4.41767e+08	5.02622e+08	1.45683e+09	9.77795e+08	9.2572e+08	382527030	1042533162	1.24443e+09	5.86018e+08	629822570	5.77575e+08	9.96724e+08	1100412902	1.1433e+09	4.1066e+08	2078076728	6.82231e+08	1.06057e+09	1.39969e+09	3.86006e+08	1.16132e+09	3.17227e+08	1.24615e+09	5.29251e+08	1629281394	4.29179e+08	3.23544e+08	8.7212e+08	1.16964e+09	9.76582e+08	8.36245e+08	1.11978
P61202	COP9 signalosome complex subunit 2 OS=Mus musculus OX=10090 GN=Cops2 PE=1 SV=1 - [CSN2_MOUSE]	93.91	1	19	56	591	2.81629e+08	1.84632e+08	2.48406e+08	2.48519e+08	1.1902e+08	817825661	2.59142e+08	1.60342e+08	3.80894e+08	1.55743e+08	2.68913e+08	2.17086e+08	2.74339e+08	3.45211e+08	3.16835e+08	1.85232e+08	205522647	2.15471e+08	3.89071e+08	2.72379e+08	2.77326e+08	1.91015e+08	2.272e+08	1.27564e+08	1.95669e+08	1.6195e+08	402590445	2.77136e+08	3.74585e+08	1.6431e+08	1.5072e+08	2.1226e+08	3.1076e+08	3.55549e+08	1.75608e+08	3.56286e+08	1.72607e+08	2.7044e+08	2.16441e+08	3.54789e+08	2.84477e+08	2.53535e+08	1.31434
P09103	Protein disulfide-isomerase OS=Mus musculus OX=10090 GN=P4hb PE=1 SV=2 - [PDIA1_MOUSE]	93.91	1	22	63	835	2.69017e+08	1.92302e+08	1.43216e+08	2.02947e+08	1.43193e+08	2.78005e+08	3.42939e+08	194372753	2.02523e+08	1.13724e+08	2.64091e+08	2.88023e+08	2.19321e+08	2.63452e+08	3.19869e+08	2.10094e+08	1.5046e+08	2.00629e+08	1.96494e+08	5.96452e+08	1.58709e+08	1.94981e+08	1.81149e+08	1.88078e+08	1.99775e+08	2.20136e+08	2.54708e+08	2.25872e+08	2.99753e+08	2.46369e+08	1.68525e+08	2.37957e+08	2.41036e+08	3.40962e+08	2.2757e+08	4.03135e+08	2.85445e+08	2.10856e+08	1.90135e+08	2.26313e+08	2.70951e+08	2.70826e+08	1.42505
Q8R071	Inositol-trisphosphate 3-kinase A OS=Mus musculus OX=10090 GN=Itpka PE=1 SV=1 - [IP3KA_MOUSE]	93.9	1	18	49	546	2.21645e+08	1.51334e+08	2.40489e+08	2.51483e+08	1.61661e+08	2.64631e+08	2.52702e+08	2.35606e+08	1.27923e+09	1.10061e+08	2.11187e+08	2.66473e+08	2.36391e+08	3.04039e+08	2.26197e+08	1.50791e+08	1.92828e+08	1.75539e+08	3.01086e+08	2.41559e+08	1.84629e+08	1.8872e+08	1.36174e+08	259750648	1.77245e+08	1.79492e+08	380390062	1.50864e+09	2.88402e+08	1.58155e+08	1.80053e+08	3.91309e+08	2.47276e+08	2.66698e+08	1.75597e+08	3.56573e+08	2.53356e+08	4.0422e+08	2.05322e+08	4.28446e+08	2.48857e+08	2.12361e+08	1.21203
P0C027	Diphosphoinositol polyphosphate phosphohydrolase 3-alpha OS=Mus musculus OX=10090 GN=Nudt10 PE=1 SV=1 - [NUD10_MOUSE]	93.9	1	3	20	186	1.55774e+09	1060747160	8.37498e+08	878342250	3.88413e+08	2.54505e+09	21045447523	7.03594e+08	7.00202e+08	3.07321e+08	7.31263e+09	1.08552e+10	5.87304e+08	6.41904e+09	5.49692e+08	9.28857e+08	6.42505e+09	5.55782e+08	1.04467e+09	8.78269e+08	1.44593e+09	1.08819e+09	5.49183e+08	6.06714e+08	5.90821e+09	9.11626e+08	8.6546e+08	6.18466e+08	6.92906e+09	7.33804e+09	5431303466	6.90888e+08	7.74997e+08	1.66394e+09	1.17576e+09	2.08011e+09	7.74076e+08	9.45713e+08	9.44547e+08	5.06032e+09	5.14478e+09	1.96653e+09	5.44682
Q8VE70	Programmed cell death protein 10 OS=Mus musculus OX=10090 GN=Pdcd10 PE=1 SV=1 - [PDC10_MOUSE]	93.87	1	8	32	150	4.00144e+07	7.01424e+07	5.16425e+07	4.50782e+08	1.81815e+08	0	6.53115e+07	5.76725e+07	4.00211e+07	1.64201e+08	7.73558e+07	2.08068e+08	3.55634e+08	3.32019e+08	6.6862e+07	5.45347e+07	4.61709e+07	52472225	7.17992e+07	2.86868e+08	40597120	4.13693e+07	4.7246e+07	381769621	3.08406e+08	9.85705e+07	8.76543e+07	7.7467e+07	3.50621e+08	1.78072e+08	5.79978e+07	96972129	7.26095e+07	6.25534e+07	7.95517e+07	1.22519e+08	7.79088e+07	8.25141e+07	1.58879e+08	6.54412e+07	2.07988e+08	1.02369e+08	1.30909
P63085	Mitogen-activated protein kinase 1 OS=Mus musculus OX=10090 GN=Mapk1 PE=1 SV=3 - [MK01_MOUSE]	93.85	11	21	48	893	1029427593	5.2111e+08	5.8054e+08	6.4845e+08	4.39105e+08	9.21351e+08	8.58535e+08	5.63134e+08	6.44715e+08	4.77575e+08	9.3067e+08	829425937	5.50543e+08	8.07234e+08	6.14915e+08	7.02741e+08	5.5426e+08	7.47656e+08	7.14091e+08	853750957	6.38002e+08	5.30086e+08	6.15603e+08	5.33276e+08	6.96428e+08	6.87665e+08	1.32576e+09	6.88183e+08	1.17818e+09	7.82719e+08	5.93962e+08	6.43402e+08	8.17655e+08	9.47551e+08	8.48431e+08	1.07858e+09	8.62148e+08	2.03783e+09	6.43727e+08	6.93062e+08	7.46558e+08	7.145e+08	1.15974
Q9JL35	High mobility group nucleosome-binding domain-containing protein 5 OS=Mus musculus OX=10090 GN=Hmgn5 PE=1 SV=2 - [HMGN5_MOUSE]	93.84	1	1	68	235	2.25188e+08	2.21585e+08	1.34445e+08	1.51649e+08	7.40014e+07	3.46298e+08	2.83678e+08	2.23092e+08	2.96687e+08	92354526	2.56589e+08	3.14453e+08	1.22907e+08	4.31471e+08	8.44769e+07	2.08568e+08	220400446	1.32157e+08	1.00051e+08	2.14574e+08	1.3667e+08	1.0307e+08	137412833	2.2148e+08	1.87402e+08	2.16384e+08	1.55978e+08	1.25765e+08	1.6456e+08	1.56602e+08	1.68446e+08	1.39971e+08	2.07856e+08	4.63536e+08	2.66567e+08	573490461	1.40135e+08	306312211	1.61374e+08	2.48422e+08	2.41979e+08	1.7515e+08	1.4995
P99029	Peroxiredoxin-5, mitochondrial OS=Mus musculus OX=10090 GN=Prdx5 PE=1 SV=2 - [PRDX5_MOUSE]	93.81	1	12	27	853	3395827177	2.17694e+09	2.02041e+09	2.58257e+09	1.77697e+09	3564842696	3106479736	2.80465e+09	2.69514e+09	1.56065e+09	2.42994e+09	3.57267e+09	2.35782e+09	2.95456e+09	2.42672e+09	2.31192e+09	2007291211	2.22967e+09	2.6245e+09	3.19856e+09	2.13545e+09	2.26851e+09	2.02297e+09	3.08412e+09	2.44222e+09	2365571047	3.69017e+09	2693033494	2.99869e+09	2.63243e+09	2.41755e+09	3.00174e+09	2.89701e+09	2.63834e+09	2.40505e+09	4.40064e+09	3.2211e+09	2.89611e+09	2.39054e+09	2.74635e+09	2.74834e+09	2.47439e+09	1.14967
Q91YJ3	Thymocyte nuclear protein 1 OS=Mus musculus OX=10090 GN=Thyn1 PE=1 SV=1 - [THYN1_MOUSE]	93.81	1	1	31	40	0	4.36866e+07	2.62093e+09	0	0	143781248	22499007	0	5.27889e+06	3.19193e+07	3.69778e+07	1.88954e+07	3.06174e+07	0	2.68247e+07	2.63539e+08	7924823	0	1.09983e+07	0	0	0	16141843	1.31039e+07	2.57471e+08	3.48763e+07	3.96272e+07	280349236	4.01807e+08	1.47597e+07	0	0	0	1.10352e+07	3.76469e+07	3.32456e+08	3.63966e+08	0	5.32924e+08	4.06957e+07	2.26631e+07	5.64924e+07	0.0425259
Q6IR34	G-protein-signaling modulator 1 OS=Mus musculus OX=10090 GN=Gpsm1 PE=1 SV=3 - [GPSM1_MOUSE]	93.76	2	9	72	315	143898156	2.65691e+08	2.66523e+08	1.57633e+09	9.5355e+07	1.24838e+08	1.85186e+09	2.91256e+08	7.47961e+07	1.72091e+08	1.07475e+08	8.2681e+08	1.32156e+08	7.76991e+07	3.35114e+08	1.75478e+08	2.80145e+08	9.09557e+07	7.15864e+07	1.52021e+08	3.61469e+08	7.90775e+07	1.27421e+08	1.74047e+08	7.91548e+07	1.52244e+08	4.70802e+08	8.46785e+07	2.70183e+08	5.97404e+08	1.21058e+08	182005799	179329460	1.03445e+08	1.66725e+08	2.5281e+08	1.67818e+09	1152266070	4.69559e+08	5.02968e+08	2.95851e+08	1.54037e+08	0.630061
Q8R3Q6	Protein MIX23 OS=Mus musculus OX=10090 GN=Mix23 PE=1 SV=1 - [MIX23_MOUSE]	93.75	1	1	14	49	1.66747e+07	3.51205e+07	0	4.84896e+07	180499814	15671598	1.12638e+08	2.61585e+07	0	3.26113e+07	0	0	7.50581e+07	151339975	1.06232e+08	266298878	3.53032e+07	45034129	47907001	1.31804e+08	0	36398746	653270	6.46977e+07	35959262	2.27437e+07	0	1.62811e+08	3.06687e+08	0	0	1.06915e+07	2.08063e+08	363152064	1.56506e+07	3.96325e+07	57781269	1.31901e+08	5.61569e+07	3.74159e+07	6.65261e+07	1.05269e+08	1.18465
Q9WUD1	E3 ubiquitin-protein ligase CHIP OS=Mus musculus OX=10090 GN=Stub1 PE=1 SV=1 - [CHIP_MOUSE]	93.75	1	9	39	202	1.40955e+08	5.66682e+07	47408913	6.72573e+07	0	5.86923e+07	3.20484e+07	6.94735e+07	4.96581e+07	4.97099e+07	4.32567e+07	1.12433e+08	4.70319e+07	8.69156e+07	1.19602e+08	2.77479e+07	2.85277e+07	64823327	1.34357e+08	1.63942e+08	5.10315e+07	4.56945e+07	8.49536e+07	3.11453e+08	7.16684e+07	1.23571e+08	1.01333e+08	7.35622e+07	1.97133e+08	71223506	7.26036e+07	62349257	6.82054e+07	2.58246e+08	9.41212e+07	1.22039e+08	1.8751e+08	7.403e+08	6.24579e+07	5.19164e+07	8.18479e+07	8.38797e+07	1.31045
P62627	Dynein light chain roadblock-type 1 OS=Mus musculus OX=10090 GN=Dynlrb1 PE=1 SV=3 - [DLRB1_MOUSE]	93.75	1	5	13	226	444840026	3.74334e+08	2.55268e+08	3.91519e+08	2.79713e+08	4.59285e+08	4.37445e+08	3.70729e+08	3.68329e+08	1.54037e+08	3.94736e+08	5.47562e+08	3.31852e+08	4.54413e+08	4.4515e+08	3.7713e+08	320278679	2.7798e+08	4.41194e+08	5.33289e+08	2.86086e+08	318893058	338139360	3.7898e+08	3.23716e+08	405808005	5.37134e+08	3.56153e+08	5.08725e+08	4.04794e+08	2.92124e+08	4.44892e+08	4.752e+08	5.07357e+08	3.86907e+08	8.64097e+08	4.33155e+08	4.9029e+08	3.49135e+08	3.57965e+08	4.34743e+08	3.89974e+08	1.2452
Q9CX34	Protein SGT1 homolog OS=Mus musculus OX=10090 GN=Sugt1 PE=1 SV=3 - [SGT1_MOUSE]	93.75	1	17	44	452	2.58846e+08	129413203	1.41408e+08	186355791	1.48739e+08	2.57429e+08	2.17022e+08	1.46283e+08	1.46655e+08	1.19464e+08	2.01578e+08	2.30452e+08	5.60188e+08	2.39214e+08	2.12082e+08	1.74682e+08	158010862	1.59024e+08	2.42831e+08	2.56187e+08	1.64598e+08	1.72818e+08	1.38558e+08	1.53059e+08	2.06264e+08	1.98221e+08	2.57006e+08	2.38718e+08	385789145	2.09277e+08	146776219	1.9638e+08	2.27804e+08	2.39026e+08	2.11146e+08	3.0301e+08	1.87692e+08	2.37037e+08	1.72952e+08	1.7737e+08	2.88703e+08	1.98147e+08	1.66926
Q9WUR9	Adenylate kinase 4, mitochondrial OS=Mus musculus OX=10090 GN=Ak4 PE=1 SV=1 - [KAD4_MOUSE]	93.72	1	9	18	154	7.80911e+07	3.82138e+07	4.72101e+07	6.31343e+07	5.85773e+07	1.0918e+08	70050281	7.92956e+07	9.26205e+07	56431241	9.3501e+07	9.87697e+07	4.03433e+07	77227439	8.8105e+07	4.87207e+07	4.88833e+07	7.25782e+07	7.20201e+07	1.19847e+08	7.99457e+07	8.81867e+07	5.59582e+07	8.72354e+07	5.29031e+07	25282853	8.25519e+07	9.68923e+07	8.43287e+07	4.06829e+07	1.15878e+08	1.22525e+08	9.08044e+07	5.59581e+07	4.19469e+07	1.31724e+08	1.2641e+08	7.26227e+07	5.70453e+07	8.15156e+07	7.95893e+07	7.24099e+07	1.39519
Q9QYI3	DnaJ homolog subfamily C member 7 OS=Mus musculus OX=10090 GN=Dnajc7 PE=1 SV=2 - [DNJC7_MOUSE]	93.72	1	8	71	376	2.3748e+08	1.36785e+09	8.26631e+08	3.46677e+08	2.79078e+08	3.40641e+08	982955312	3.93228e+08	1.45775e+09	4.4825e+08	6.96105e+08	5.93881e+08	2.22424e+08	5.23658e+08	4.33025e+08	8.47554e+07	5.5886e+08	3.30578e+08	4.54658e+08	5.87131e+08	5.58261e+08	4.13866e+08	3.62363e+08	5.66785e+08	1.09128e+09	5.03789e+08	1.65632e+09	1.583e+09	1.62667e+09	6.85808e+08	4.277e+08	9.65289e+08	1.95776e+09	592664891	2.73534e+08	758867744	1.17038e+09	7.62519e+08	6.11543e+08	7.24564e+08	4.93819e+08	4.03197e+08	0.807496
Q04447	Creatine kinase B-type OS=Mus musculus OX=10090 GN=Ckb PE=1 SV=1 - [KCRB_MOUSE]	93.7	1	25	40	8438	2.97705e+10	2.04469e+10	2.2568e+10	2.64626e+10	2.10205e+10	2.92747e+10	3.27512e+10	2.61227e+10	2.6713e+10	16620544161	2.7961e+10	2.97712e+10	25179262345	34547661060	2.97038e+10	2.68148e+10	2.34394e+10	2.47443e+10	31463081171	3.27487e+10	2.46946e+10	2.59308e+10	2.57844e+10	2.44508e+10	2.62711e+10	2.50347e+10	32105304098	2.75443e+10	3.16063e+10	2.8008e+10	2.23222e+10	2.98622e+10	3.12416e+10	3.19674e+10	2.76616e+10	3.84598e+10	2.83596e+10	32646603873	2.40537e+10	2.62964e+10	2.94326e+10	2.7842e+10	1.22362
P97807	Fumarate hydratase, mitochondrial OS=Mus musculus OX=10090 GN=Fh PE=1 SV=3 - [FUMH_MOUSE]	93.69	1	25	68	921	7.68029e+08	4.98105e+08	6.2962e+08	7.73182e+08	5.36636e+08	1.07939e+09	1.02312e+09	528872606	4.82681e+08	4.77308e+08	8.42789e+08	8.46622e+08	6.43735e+08	6.56194e+08	5.89624e+08	7.53171e+08	584973732	5.90373e+08	6.47075e+08	9.73714e+08	4.6319e+08	4.62779e+08	5.88218e+08	9.23063e+08	6.88677e+08	6.10617e+08	8.20016e+08	696064576	8.89571e+08	577043929	7.98093e+08	9.67205e+08	9.83182e+08	1.28519e+09	6.76644e+08	1.14842e+09	6.85476e+08	7.18986e+08	6.41114e+08	7.18272e+08	7.15793e+08	7.09861e+08	1.11648
P63280	SUMO-conjugating enzyme UBC9 OS=Mus musculus OX=10090 GN=Ube2i PE=1 SV=1 - [UBC9_MOUSE]	93.67	1	7	18	146	120490515	2.05291e+07	0	1.26604e+08	4.5614e+07	4.23367e+06	49423618	5.42115e+07	1.28793e+06	4.01565e+07	1.71235e+07	103307842	1.19987e+07	690161	1.60475e+08	2.14626e+07	0	1153189552	6.62311e+07	171793032	1.57825e+07	2.69136e+07	5.4088e+07	3.47035e+07	4.09443e+07	4.10172e+06	1.17042e+08	842885436	9.01391e+07	6.45687e+07	1.22106e+07	671705005	28915305	8.42511e+07	145842558	0	2.03545e+06	7.1932e+07	6.26474e+07	2.98627e+07	5.87191e+07	2.82535e+08	0.937295
Q9JKS5	Intracellular hyaluronan-binding protein 4 OS=Mus musculus OX=10090 GN=Habp4 PE=1 SV=2 - [HABP4_MOUSE]	93.67	1	9	39	187	129302759	1.13569e+08	1.27275e+08	1.46612e+08	7.90649e+07	3.66465e+08	9.25584e+07	4.59091e+07	8.0835e+07	1.09482e+08	264475951	9.668e+07	4.78139e+07	1.20376e+08	1.35443e+08	1.31417e+08	1.18329e+08	5.37099e+07	3.92988e+07	2.11654e+08	9.27951e+07	1.52589e+08	2.75485e+07	1.13502e+09	9.10205e+07	5.75593e+07	68233981	1.13636e+08	9.56865e+07	1.5886e+08	5.16353e+07	5.68122e+07	1.01425e+08	5.58225e+07	82078338	4.53627e+07	1.56486e+08	6.19401e+07	1.19165e+08	1.3905e+08	1.32958e+08	1.10882e+08	1.11575
P62821	Ras-related protein Rab-1A OS=Mus musculus OX=10090 GN=Rab1A PE=1 SV=3 - [RAB1A_MOUSE]	93.66	4	7	32	506	2.04165e+09	1.31166e+09	1.1277e+09	1912408184	9.0832e+08	1.96226e+09	2.06007e+09	1.4991e+09	1.42304e+09	6.5978e+08	1.44095e+09	2.36109e+09	1.45639e+09	2.43457e+09	1369197646	1.45907e+09	1.88406e+09	1.61756e+09	1.58926e+09	2.26603e+09	1.02749e+09	1.21236e+09	1.01055e+09	1.57983e+09	1.11559e+09	1.51745e+09	2.00282e+09	2.0215e+09	1.4113e+09	1.82264e+09	1.51722e+09	1.14307e+09	2.15155e+09	1.84048e+09	1.52352e+09	4.15467e+09	2.00448e+09	1.89616e+09	1.46035e+09	1.52085e+09	1.81244e+09	1.76319e+09	1.2411
P62320	Small nuclear ribonucleoprotein Sm D3 OS=Mus musculus OX=10090 GN=Snrpd3 PE=1 SV=1 - [SMD3_MOUSE]	93.65	1	3	23	161	3.05079e+08	3.78828e+08	3.45477e+08	4.62035e+08	1.33281e+08	1.81458e+09	2.90152e+08	4.88726e+08	1.92008e+08	1.42326e+08	190707581	339842787	1.32514e+08	1.46356e+08	3.93936e+08	2.0701e+08	3.52691e+08	3.07668e+08	1.93501e+08	3.10669e+08	1.99219e+08	2.03873e+08	2.38301e+08	1.76229e+08	2.45238e+08	2.65068e+08	2.95403e+08	1.7291e+08	305074628	2.48383e+08	1.51981e+08	185505260	1.74542e+08	2.74567e+08	2.08687e+08	3.74862e+08	2.09528e+08	4.61448e+08	3.2494e+08	5.85559e+08	2.40671e+08	2.74308e+08	0.740663
Q5SQY2	Biorientation of chromosomes in cell division protein 1 OS=Mus musculus OX=10090 GN=Bod1 PE=3 SV=1 - [BOD1_MOUSE]	93.64	1	1	15	58	4.68396e+07	70925081	2.7368e+07	4.56488e+07	28920879	5.95867e+07	55874649	3.60043e+07	5.65203e+07	2.86179e+07	6.43204e+07	0	35199061	6.85727e+07	1.44472e+07	58605098	3.96721e+07	7.42284e+07	3.57479e+07	22270037	3.03387e+07	11603837	0	75950860	0	0	1.49142e+08	2.3143e+07	1.22691e+08	1.60974e+08	0	83479114	0	1.61749e+07	3.49534e+07	1.80516e+07	722126	48748311	4.39405e+07	4.73208e+07	3.65079e+07	4.61047e+07	0.830849
Q9D0B5	Thiosulfate sulfurtransferase/rhodanese-like domain-containing protein 3 OS=Mus musculus OX=10090 GN=Tstd3 PE=1 SV=1 - [TSTD3_MOUSE]	93.63	1	2	16	53	0	10713801	5.53165e+07	4.62264e+07	1.54269e+07	1.39522e+08	37330992	0	2.50039e+07	2.23874e+07	9.14365e+06	1.18996e+08	0	3.49809e+07	2.72166e+07	9.74904e+07	5.763e+06	0	1.36506e+08	4.92551e+07	2.58903e+07	0	0	4.05189e+07	4.38855e+07	3.41958e+07	5.62803e+07	3.89176e+07	42577365	3.36334e+07	46967388	0	2.44043e+07	2.70092e+08	2.65533e+07	7.48532e+07	5.32885e+06	2.51081e+07	2.55367e+07	4.48489e+07	3.80674e+07	5.7803e+07	1.49069
P28663	Beta-soluble NSF attachment protein OS=Mus musculus OX=10090 GN=Napb PE=1 SV=2 - [SNAB_MOUSE]	93.62	1	22	48	1170	1.02078e+09	6.5592e+08	681840623	8.32097e+08	6.22191e+08	1.02368e+09	1.03627e+09	9.33645e+08	9.39746e+08	4.47507e+08	7.98108e+08	1180736147	8.18033e+08	1113221651	8.6323e+08	6.84674e+08	8.12272e+08	6.99942e+08	9.8264e+08	1.16759e+09	7.2161e+08	7.80054e+08	6.73194e+08	1025456360	6.82681e+08	8.12115e+08	1.35361e+09	9.48932e+08	1.09227e+09	8.85856e+08	7.00339e+08	9.40325e+08	1.07151e+09	1.20324e+09	6.82666e+08	1880116955	8.52456e+08	1158488450	7.62566e+08	8.76169e+08	9.54666e+08	8.69424e+08	1.25191
Q64727	Vinculin OS=Mus musculus OX=10090 GN=Vcl PE=1 SV=4 - [VINC_MOUSE]	93.62	1	33	153	932	430095701	2.75734e+08	5.78862e+08	5.94699e+08	9.13081e+07	7.09998e+08	2.35535e+08	7.70236e+08	4.85621e+08	315747067	2.61041e+08	8.5579e+08	4.09742e+08	5.50326e+08	7.77501e+08	168799445	7.11771e+08	6.51422e+08	4.83225e+08	7.35599e+08	2.96805e+08	1.23177e+08	568727641	6.89436e+08	4.24809e+08	8.90357e+08	5.62752e+08	8.37241e+08	6.6915e+08	2.99992e+08	4.99787e+08	1.74629e+09	6.93291e+08	1.05845e+09	3.85135e+08	3.32407e+08	6.2616e+08	2.1191e+08	3.9414e+08	5.03428e+08	5.7088e+08	5.50163e+08	1.44842
O08970	Tuftelin OS=Mus musculus OX=10090 GN=Tuft1 PE=1 SV=2 - [TUFT1_MOUSE]	93.59	1	1	46	139	2.1237e+08	7.65096e+07	3.82038e+07	7.17894e+07	7.91289e+07	337100741	1.01698e+08	5.03916e+08	147063626	3.96872e+07	2.15792e+08	1.36926e+08	6.44863e+07	1.17488e+08	158065357	1.13937e+08	1.88726e+08	3.02322e+06	77769226	1.46499e+08	7.34459e+07	3.14084e+07	6.69638e+06	7.91737e+07	0	6.49053e+07	2.4576e+08	8.53026e+07	9.25418e+06	5.50627e+07	9.454e+07	6.00042e+07	1.93772e+08	1.87974e+08	1.77135e+08	4.56094e+08	179903656	3.42713e+08	9.56003e+07	2.25893e+08	1.38551e+08	1.05991e+08	1.44928
Q8JZY2	COMM domain-containing protein 10 OS=Mus musculus OX=10090 GN=Commd10 PE=1 SV=1 - [COMDA_MOUSE]	93.56	1	1	23	76	210174654	3350052868	1.4846e+09	0	2.54243e+07	4.33249e+07	1.67651e+09	1.41613e+08	6.94261e+07	1.86837e+07	1.28566e+09	1.9598e+09	36319703	0	98284556	0	0	177186073	0	0	1765214628	1.20032e+09	2.68524e+09	77423053	1.97484e+09	1.40085e+09	41327915	5.26394e+07	2.7849e+07	3692620666	1.93524e+07	19033398	3.36784e+07	116187008	2.06234e+06	7.33167e+07	34770217	4.64101e+07	1.01405e+09	3.89912e+08	6.76012e+08	3.54372e+07	0.666646
Q8VEH3	ADP-ribosylation factor-like protein 8A OS=Mus musculus OX=10090 GN=Arl8a PE=1 SV=1 - [ARL8A_MOUSE]	93.55	1	3	23	141	3.56815e+07	8.13861e+07	136359773	1.17377e+08	8.25295e+07	131991553	55827396	5.48316e+07	127971655	5.04401e+07	8.52092e+07	5.04304e+07	1.12589e+08	1.30816e+08	2.55641e+08	2.98624e+07	1.62165e+08	1.70105e+08	394362344	1.58105e+08	0	23066251	6.4758e+07	7.91647e+07	126452208	94993722	1.86057e+08	1.27825e+08	2.40386e+08	6.86465e+07	6.48052e+07	8.38509e+07	1.09845e+08	1.90154e+08	128573497	1.28502e+08	4.55757e+07	1.17585e+08	9.06668e+07	8.42125e+07	1.26937e+08	1.8292e+08	1.40004
O54865	Guanylate cyclase soluble subunit beta-1 OS=Mus musculus OX=10090 GN=Gucy1b1 PE=1 SV=1 - [GCYB1_MOUSE]	93.55	1	12	51	279	2.24266e+08	2.42333e+08	1.9026e+08	1.33176e+08	97889522	2.41313e+08	4.67689e+08	1.61056e+08	1.25234e+08	1.79775e+08	1.84557e+08	4.37201e+08	129444378	2.98014e+08	2.05186e+08	3.24109e+08	2.28108e+08	3.74479e+07	3.43722e+08	5.91285e+08	3.15007e+08	1.20434e+08	2.55195e+08	3.35961e+08	1.62707e+08	1.98799e+08	4.24443e+08	1.84176e+08	1.45142e+08	298310744	1.26723e+08	4.46439e+07	3.45749e+08	4.54041e+08	3.64322e+08	1.0823e+08	390259741	3.18732e+08	1.77585e+08	2.35013e+08	2.5088e+08	3.04934e+08	1.41274
O89079	Coatomer subunit epsilon OS=Mus musculus OX=10090 GN=Cope PE=1 SV=3 - [COPE_MOUSE]	93.51	1	9	25	158	1.02161e+09	4.67055e+07	1.98436e+07	5.22559e+07	4.21964e+07	4.87963e+07	6.08315e+07	2.15243e+08	2.83584e+07	3.79197e+07	1.53445e+09	3.696e+08	46304672	6.01524e+07	3.4282e+07	4.67445e+07	2.76255e+07	4.30751e+07	1.65875e+07	4.81773e+07	1.80207e+09	5.06869e+07	1.1335e+08	4.43118e+07	6.93926e+07	1.82851e+07	1.64716e+08	4.16859e+07	6.40248e+07	3.49505e+07	5.18636e+07	5.66814e+07	5.02824e+07	2.04006e+07	5.62593e+07	7.63232e+07	4.50473e+07	1.32226e+08	2.36523e+08	7.82297e+07	4.08959e+08	3.6442e+07	1.72905
P27048	Small nuclear ribonucleoprotein-associated protein B OS=Mus musculus OX=10090 GN=Snrpb PE=1 SV=1 - [RSMB_MOUSE]	93.51	2	6	32	207	157559406	1.98317e+08	1.53902e+08	1.61845e+08	1.27173e+08	1.30686e+08	2.62108e+08	1.5876e+08	1.77117e+08	1.43743e+08	1.92015e+08	3.06668e+08	2.29915e+08	325648152	2.05635e+08	166720093	2.89027e+08	1.71676e+08	3.63761e+08	2.06526e+08	1.75281e+08	2.04119e+08	178682588	1.60269e+08	210682558	1.8124e+08	5.51914e+08	1.84575e+08	2.6529e+08	1.78077e+08	1.38955e+08	1.67816e+08	1.97048e+08	2.22664e+08	2.0847e+08	776669558	3.57467e+08	2.01644e+08	1.59759e+08	1.74483e+08	2.51976e+08	2.39542e+08	1.57722
Q99KH8	Serine/threonine-protein kinase 24 OS=Mus musculus OX=10090 GN=Stk24 PE=1 SV=1 - [STK24_MOUSE]	93.5	1	9	42	266	9.38349e+07	1.00034e+08	4.87685e+07	1.32477e+08	73684625	1.14116e+08	1.49368e+08	1.71148e+08	1.49778e+08	2.1191e+08	8.979e+07	1.58981e+08	63404390	1.11996e+08	5.4802e+07	1.0392e+08	8.96401e+07	7.39433e+07	1.74758e+08	1.05789e+08	8.86992e+07	1.18686e+08	6.57958e+07	153858138	9.18528e+07	1.11016e+08	1.48672e+08	9.99527e+07	1.29774e+08	2.97136e+08	7.44941e+07	1.09165e+08	205275073	2.38521e+08	1.00808e+08	1.67246e+08	9.36689e+07	2.3318e+08	8.97598e+07	1.59264e+08	9.57948e+07	1.0961e+08	1.06723
P19783	Cytochrome c oxidase subunit 4 isoform 1, mitochondrial OS=Mus musculus OX=10090 GN=Cox4i1 PE=1 SV=2 - [COX41_MOUSE]	93.49	1	1	21	63	4.60033e+08	4.13197e+08	3.94539e+08	2.79241e+08	252787662	4.65719e+08	4.70294e+08	4.57918e+08	1.61473e+08	3.70503e+08	3.6937e+08	6.96243e+08	3.40371e+08	4.82003e+07	0	3.89911e+08	645316772	2.89869e+08	1.49198e+08	3.95159e+08	4.15103e+08	4.79207e+08	2.17559e+08	4.34778e+08	4.11288e+08	0	2.25969e+08	2.5981e+08	5.93626e+08	3.54764e+08	650379377	1.53478e+08	9.41473e+08	6.08162e+08	1.42395e+08	493604410	3.70783e+08	0	3.5996e+08	3.85181e+08	2.90837e+08	3.73891e+08	0.807971
Q8R164	Valacyclovir hydrolase OS=Mus musculus OX=10090 GN=Bphl PE=1 SV=1 - [BPHL_MOUSE]	93.47	1	9	37	213	4.67912e+08	2.18608e+08	2.07799e+08	2.85201e+08	2.22333e+08	5.49412e+08	5.16572e+08	2.51164e+08	3.22678e+08	8.83979e+07	5.61059e+08	4.07039e+08	2.73748e+08	3.21768e+08	589900391	3.67567e+08	2.24611e+08	3.03434e+08	2.945e+08	3.57278e+08	6.65151e+07	2.27565e+08	2.63786e+08	2.27736e+08	2.63947e+08	3.73913e+08	3.1419e+08	2.6623e+08	3.4533e+08	2.90486e+08	2.29739e+08	1.51872e+08	3.03057e+08	4.21682e+08	3.95766e+08	5.19769e+08	3.06158e+08	3.59528e+08	2.8037e+08	3.45645e+08	4.30703e+08	3.09478e+08	1.53619
Q9CZ04	COP9 signalosome complex subunit 7a OS=Mus musculus OX=10090 GN=Cops7a PE=1 SV=2 - [CSN7A_MOUSE]	93.45	1	12	25	263	2.38142e+08	1.30575e+08	1.8321e+08	1.39361e+08	138411057	4.42187e+08	3.51658e+08	2.18954e+08	1.11018e+08	1.65126e+08	3.00039e+08	4.1458e+08	289666439	3.14331e+08	1.57967e+08	1.64551e+08	253369981	2.21313e+08	3.10434e+08	278692652	143470547	132372515	1.73684e+08	1.63733e+08	1.70389e+08	1.77191e+08	187179933	1.24928e+08	1.62413e+08	1.97532e+08	9.60367e+07	1.09738e+08	2.26656e+08	3.0694e+08	1.58135e+08	3.33422e+08	2.52383e+08	1.4277e+08	1.6594e+08	2.57789e+08	2.95317e+08	2.45672e+08	1.77966
P40630	Transcription factor A, mitochondrial OS=Mus musculus OX=10090 GN=Tfam PE=1 SV=2 - [TFAM_MOUSE]	93.42	1	3	36	99	2.52691e+09	6.68471e+08	8.10926e+08	1.06194e+09	0	2.29489e+09	1.6859e+08	8.40873e+08	1.20038e+09	3428543331	4168048647	0	9.02341e+08	1.5825e+09	3.50056e+09	9.18816e+08	1.37854e+09	4.76345e+06	2.10038e+08	1.62388e+09	1.39599e+09	7.49947e+08	2.92857e+09	1.5869e+09	1.83884e+07	1.42959e+09	13933322	1.18716e+09	1.74511e+09	1.09206e+09	1.39761e+09	1.48424e+09	1821867721	1.24478e+09	3645996443	2015753393	1.55201e+09	1.29537e+09	1.01365e+09	1.58666e+09	2.03069e+09	8.27207e+08	2.00334
P23506	Protein-L-isoaspartate(D-aspartate) O-methyltransferase OS=Mus musculus OX=10090 GN=Pcmt1 PE=1 SV=3 - [PIMT_MOUSE]	93.39	1	15	28	614	8.29512e+08	4.53694e+08	6.13615e+08	4.86498e+08	5.50775e+08	7.72539e+08	9.52834e+08	5.66895e+08	8.77958e+08	3.64616e+08	7.37157e+08	8.50982e+08	435048754	1.13323e+09	9.10777e+08	6.40025e+08	484184170	6.89251e+08	5.25739e+08	1156955481	734557294	8.06032e+08	335124631	6.20459e+08	6.72616e+08	5.36269e+08	8.55994e+08	4.15227e+08	4.9305e+08	7.71827e+08	4.17036e+08	914039147	9.64443e+08	7.20753e+08	3.84717e+08	892292592	9.00335e+08	9.70296e+08	5.86819e+08	7.06968e+08	8.13438e+08	6.99231e+08	1.38618
Q9DBP5	UMP-CMP kinase OS=Mus musculus OX=10090 GN=Cmpk1 PE=1 SV=1 - [KCY_MOUSE]	93.37	1	11	32	709	7.97493e+08	4.86255e+08	5.10522e+08	8.05114e+08	4.1353e+08	9.3307e+08	8.17889e+08	6.98623e+08	6.22866e+08	4.13987e+08	797268382	1.08689e+09	5.41954e+08	9.74294e+08	6.94418e+08	6.59761e+08	6.56291e+08	5.96627e+08	6.89464e+08	1.00733e+09	6.66412e+08	673246801	5.79996e+08	7.34275e+08	6.57907e+08	8.84765e+08	1.14116e+09	8.3891e+08	7.70017e+08	7.72695e+08	5.63922e+08	691368667	8.0468e+08	7.77031e+08	728958369	1.12311e+09	831776922	8.48796e+08	6.02583e+08	6.97287e+08	8.18966e+08	7.21895e+08	1.35909
Q9CX60	Protein LBH OS=Mus musculus OX=10090 GN=Lbh PE=1 SV=1 - [LBH_MOUSE]	93.33	1	2	8	16	0	87117350	0	1.11989e+06	0	0	0	37181840	0	7.53681e+07	0	0	0	13799134	0	0	0	0	0	0	1.34024e+07	0	0	0	9.24039e+06	4.15656e+06	0	0	0	24359890	0	205910737	2.20012e+07	0	0	2.41064e+06	3.9096e+07	0	1.76474e+07	2.251e+07	2.75983e+06	0	0.156387
Q8VDQ8	NAD-dependent protein deacetylase sirtuin-2 OS=Mus musculus OX=10090 GN=Sirt2 PE=1 SV=2 - [SIR2_MOUSE]	93.32	1	12	47	309	2.75493e+08	1.97056e+08	1.10615e+08	1.92977e+08	1.59695e+08	2.36839e+08	3.47731e+08	2.08737e+08	1.49511e+08	1.09333e+08	1.77279e+08	3.57424e+08	161536088	204675711	1.77647e+08	195962749	1.61485e+08	1.60235e+08	1.82499e+08	257174926	1.09218e+08	8.9127e+07	1.40345e+08	2.60205e+08	2.23525e+08	2.40429e+08	2.25545e+08	1.80863e+08	2.073e+08	2.42713e+08	1.60572e+08	1.56781e+08	1.68606e+08	404293304	2.57561e+08	4.96887e+08	2.22822e+08	2.01418e+08	1.87167e+08	2.10431e+08	2.15712e+08	1.91471e+08	1.15251
P80315	T-complex protein 1 subunit delta OS=Mus musculus OX=10090 GN=Cct4 PE=1 SV=3 - [TCPD_MOUSE]	93.32	1	29	84	1160	5.65199e+08	384458298	3.81441e+08	4.53804e+08	5.64557e+08	604804534	6.58615e+08	5.09189e+08	4.41001e+08	2.65215e+08	4.26798e+08	7.17556e+08	4.02914e+08	5.04076e+08	4.59322e+08	4.11537e+08	4.52533e+08	3.74963e+08	4.81892e+08	5.77601e+08	3.24496e+08	3.32532e+08	3.89925e+08	5.21499e+08	4.12531e+08	6.24643e+08	7.01304e+08	4.88702e+08	5.37319e+08	5.17293e+08	3.07348e+08	4.43816e+08	4.95771e+08	7.87125e+08	5.41401e+08	9.89743e+08	1.00951e+09	5.23257e+08	4.69892e+08	4.95765e+08	5.02133e+08	4.59705e+08	1.06861
Q7TPR4	Alpha-actinin-1 OS=Mus musculus OX=10090 GN=Actn1 PE=1 SV=1 - [ACTN1_MOUSE]	93.27	2	33	112	1496	6.00903e+08	3.76825e+08	4.32307e+08	5.70429e+08	3.96876e+08	613122176	614386852	2.84104e+09	6.11314e+08	7.47834e+08	5.41786e+08	6.64014e+08	6.13944e+08	1.28124e+09	5.8242e+08	4.56619e+08	6.25826e+08	8.4803e+08	8.04841e+08	8.54067e+08	4.58855e+08	5.05241e+08	5.25278e+08	5.00238e+08	460676627	5.56354e+08	7.74578e+08	5.60988e+08	7.00016e+08	5.98369e+08	5.69619e+08	6.70029e+08	1.54864e+09	9.01248e+08	686434117	8.65394e+08	6.91567e+08	6.88845e+08	4.75468e+08	1.08554e+09	7.3668e+08	7.17877e+08	1.54938
Q8BKX1	Brain-specific angiogenesis inhibitor 1-associated protein 2 OS=Mus musculus OX=10090 GN=Baiap2 PE=1 SV=2 - [BAIP2_MOUSE]	93.27	1	20	80	756	1925365282	1.8177e+08	1612171204	1.9138e+09	1.41333e+09	261495260	2.14707e+09	2.0611e+09	1.54329e+09	1.17507e+09	2.22089e+09	2.56897e+08	1.95046e+09	5.56469e+08	1.5286e+09	1.76189e+09	1.76325e+09	1.58048e+09	2.0182e+09	2.17943e+09	2.36861e+08	3.98158e+08	1.8129e+09	2445978178	1.76844e+09	2.53579e+09	517001680	3.21696e+08	4.79461e+08	3.27474e+08	1.69445e+09	5.30603e+08	1.9432e+09	2.56558e+08	1.72089e+08	3.02058e+09	1.62384e+09	2.46932e+09	1.40929e+09	1.4376e+09	1.30266e+09	1.86065e+09	0.924342
P57776	Elongation factor 1-delta OS=Mus musculus OX=10090 GN=Eef1d PE=1 SV=3 - [EF1D_MOUSE]	93.24	1	7	31	290	5.01463e+08	2.85537e+08	2.71326e+08	4.18713e+08	1.9556e+08	565996832	4.70757e+08	2.72594e+08	2.81927e+08	1.33456e+08	3.8674e+08	4.76699e+08	2.57179e+08	4.97237e+08	2.91694e+08	3.97958e+08	2.08482e+08	1.98281e+08	4.46579e+08	5.28581e+08	3.23558e+08	2.80245e+08	1.64611e+08	249529439	3.93133e+08	2.63143e+08	5.17481e+08	4.2601e+08	4.9247e+08	4.46428e+08	2.32452e+08	4.69153e+08	463987793	4.60147e+08	2.85518e+08	6.83078e+08	5.42519e+08	2.96687e+08	3.3452e+08	3.44946e+08	3.8191e+08	3.55976e+08	1.14167
P55258	Ras-related protein Rab-8A OS=Mus musculus OX=10090 GN=Rab8a PE=1 SV=2 - [RAB8A_MOUSE]	93.24	7	2	29	279	1.8561e+09	1.13572e+09	1.21188e+09	1.22971e+09	9.40921e+08	1.7845e+09	2471278472	1.45504e+09	1.23849e+09	7.73455e+08	1.6075e+09	2737617738	1.54773e+09	1.83717e+09	1423677417	1.56339e+09	1.09531e+09	1.27266e+09	1690964258	1.84313e+09	1.075e+09	1206801605	1.07083e+09	1.42521e+09	1.25861e+09	1.49361e+09	2.07926e+09	1455346818	1.56235e+09	1.62867e+09	1.02739e+09	1.21345e+09	1.71557e+09	1.55864e+09	1.6263e+09	2.99546e+09	1.86841e+09	1.9699e+09	1.27487e+09	1.54455e+09	1.83074e+09	1.49309e+09	1.43602
P62806	Histone H4 OS=Mus musculus OX=10090 GN=H4c1 PE=1 SV=2 - [H4_MOUSE]	93.2	1	10	24	743	7.272e+09	5380371958	5.32078e+09	4.31723e+09	2.67791e+09	7.76903e+09	7.87131e+09	3.41739e+09	3.62421e+09	4.15003e+09	6.41531e+09	6.90231e+09	3.65186e+09	5.19933e+09	4.46257e+09	7.33493e+09	4.72874e+09	5.9701e+09	5.07887e+09	5.8366e+09	2853884978	3.16355e+09	5.71116e+09	3.61347e+09	4.98017e+09	5.63002e+09	4.89783e+09	4.02792e+09	5.47675e+09	7.88017e+09	2.44031e+09	3069926368	3.41861e+09	1.16565e+10	8.02295e+09	1.12369e+10	5.58074e+09	4.53923e+09	4.99366e+09	5.36639e+09	5.32627e+09	5.78985e+09	1.06661
Q9CYZ2	Tumor protein D54 OS=Mus musculus OX=10090 GN=Tpd52l2 PE=1 SV=1 - [TPD54_MOUSE]	93.18	1	12	34	352	2.6321e+08	342965285	1.94235e+08	1.85097e+08	9.87625e+07	1.72664e+08	2.11923e+08	170891412	3.04235e+08	1.38521e+08	3.77716e+08	2.88379e+08	1.44037e+08	2.78631e+08	9.56561e+07	1.08154e+08	175722707	5.73804e+08	2.18241e+08	1.55858e+08	2.05552e+08	1.20612e+08	1.56485e+08	1.52873e+08	1.72788e+08	1.8286e+08	2.92134e+08	3.56473e+08	2.82671e+08	1.3971e+08	1.50018e+08	2.05058e+08	1.79774e+08	3.0781e+08	1.89488e+08	3.4349e+08	133596624	1.96173e+08	2.16854e+08	1.99647e+08	2.36884e+08	2.46356e+08	1.09237
Q05A62	Dynein axonemal light chain 1 OS=Mus musculus OX=10090 GN=Dnal1 PE=1 SV=2 - [DNAL1_MOUSE]	93.16	1	2	24	125	3.67607e+07	3.61491e+07	1.64613e+07	4.41752e+07	1.22971e+07	5.66281e+07	0	3.36146e+07	4.87997e+07	4.91242e+07	47039789	5.29868e+07	3.23983e+07	1.37067e+07	7.08887e+07	5.83153e+07	21122471	1.86084e+07	6.6152e+06	7.10086e+07	1.80999e+07	1.33201e+08	1.6688e+08	3.66654e+07	1.67296e+08	135065340	6.03456e+07	5.85872e+07	50305813	27026602	2.50117e+07	3.56375e+07	8.45319e+07	1.01326e+07	2.77129e+07	7.50078e+07	5.41937e+07	8.01885e+07	2.91687e+07	3.76333e+07	4.34041e+07	3.5134e+07	1.48804
P70336	Rho-associated protein kinase 2 OS=Mus musculus OX=10090 GN=Rock2 PE=1 SV=1 - [ROCK2_MOUSE]	93.16	2	42	189	1357	6.23616e+08	2.85257e+08	2.18114e+08	1.75753e+08	2.94161e+08	7.65183e+08	8.8225e+08	1.68046e+08	3.01507e+08	141487924	1579152887	6.32788e+08	2.79263e+08	6.1855e+08	5.19391e+08	2.38689e+08	2.50694e+08	2.70104e+08	7.4799e+08	1.16921e+09	2.1736e+08	1.39877e+08	2.32572e+08	4.02648e+08	2.04322e+08	1.05768e+09	8.12456e+08	6.8275e+08	8.30156e+08	2.4796e+08	6.54713e+08	2.46458e+08	1.6836e+09	2.78165e+08	3.2088e+08	1.65082e+09	9.47754e+08	1.4818e+09	3.1938e+08	4.51695e+08	7.25829e+08	5.35337e+08	2.27262
P61982	14-3-3 protein gamma OS=Mus musculus OX=10090 GN=Ywhag PE=1 SV=2 - [1433G_MOUSE]	93.12	2	13	37	2550	2.65187e+10	1.69104e+10	1.76273e+10	21818681506	1.55658e+10	2.37072e+10	2.35539e+10	2.07167e+10	2.44468e+10	1.36143e+10	2.32673e+10	2.63996e+10	2.09641e+10	2.71072e+10	2.07338e+10	1.79422e+10	19296960990	1.83838e+10	2.57754e+10	27131720943	1.80761e+10	2.00616e+10	18641620081	2.33517e+10	2.16286e+10	1.93961e+10	33883872519	22267407653	2.71036e+10	2.01166e+10	1.70764e+10	2.12226e+10	2.49065e+10	2.21704e+10	1.76526e+10	3.03096e+10	2.83758e+10	2.77346e+10	1.96882e+10	2.12078e+10	2.36944e+10	2.1706e+10	1.20348
Q99LX0	Parkinson disease protein 7 homolog OS=Mus musculus OX=10090 GN=Park7 PE=1 SV=1 - [PARK7_MOUSE]	93.12	1	13	27	735	1.39295e+09	9.68028e+08	7.74112e+08	9.07993e+08	6.3378e+08	1.18629e+09	1020398743	1.35417e+09	1.03602e+09	6.46888e+08	1.13544e+09	1.57332e+09	851564238	1.249e+09	793317635	8.46972e+08	1135640977	9.0207e+08	1.16967e+09	1.43207e+09	7.79693e+08	7.97756e+08	8.2434e+08	1.22556e+09	1.20845e+09	1.20077e+09	1.58822e+09	1.00302e+09	1.15282e+09	9.64803e+08	7.82161e+08	1.00052e+09	1.24981e+09	1422779376	1.07661e+09	2.01251e+09	1.25312e+09	1.35676e+09	9.35372e+08	1.04875e+09	1.12053e+09	1.09729e+09	1.19795
P16330	2',3'-cyclic-nucleotide 3'-phosphodiesterase OS=Mus musculus OX=10090 GN=Cnp PE=1 SV=3 - [CN37_MOUSE]	93.1	1	31	66	1103	1.37475e+09	6.13016e+08	6.02857e+08	8.34252e+08	5.50415e+08	1.17237e+09	1.46734e+09	6.33413e+08	7.04824e+08	3.93917e+08	1.03686e+09	1.12045e+09	9.20992e+08	8.30884e+08	8.8989e+08	1.22688e+09	5.82848e+08	6.53677e+08	1.04919e+09	1.00529e+09	6.24343e+08	6.00814e+08	9.18406e+09	1.00213e+09	1.05661e+09	8.37687e+08	9.78711e+08	9.49604e+08	8.50506e+08	8.91198e+08	5.46118e+08	7.12437e+08	8.48657e+08	1.20435e+09	1.09588e+09	1.4185e+09	9.90273e+08	1062508052	7.95057e+08	8.74373e+08	9.59816e+08	9.03576e+08	1.20723
Q91ZA3	Propionyl-CoA carboxylase alpha chain, mitochondrial OS=Mus musculus OX=10090 GN=Pcca PE=1 SV=2 - [PCCA_MOUSE]	93.09	2	16	88	442	463382089	2.07413e+08	1.51542e+08	7.13811e+08	5.32894e+08	3.5865e+08	8.81462e+08	7.34281e+08	8.68284e+08	6.96598e+08	233974729	3.31698e+08	7.69039e+08	1.92607e+08	2.06036e+08	3.19588e+08	1.40226e+08	6.99198e+08	1.24988e+09	2.10421e+08	8.40114e+07	1.1191e+08	1.0622e+08	1.41094e+08	4.38848e+08	4.50672e+08	1.03234e+09	7.26703e+08	1.47069e+08	350771793	7.05413e+08	132988255	2.06458e+08	9.58113e+08	2.20258e+08	2.78754e+08	2.87852e+08	2.26714e+08	4.13808e+08	7.07855e+08	3.46671e+08	5.23863e+08	0.837757
Q921H9	Cytochrome c oxidase assembly factor 7 OS=Mus musculus OX=10090 GN=Coa7 PE=1 SV=1 - [COA7_MOUSE]	93.07	1	1	29	190	6.21266e+08	0	1.74757e+08	2.19305e+08	1.48392e+08	2.4664e+08	3.35446e+08	1.40107e+08	1.56546e+08	1.71547e+08	61638639	5.53406e+08	2.16743e+08	3.17428e+08	1.13894e+08	2.00905e+08	2.63848e+08	2.64409e+08	2.47884e+08	3.15464e+08	2.32403e+08	1.4997e+08	2.66546e+08	1.22975e+08	2.67651e+08	284610136	1.65604e+08	2.33906e+08	2.49013e+08	2.86098e+08	1.2584e+08	3.7417e+08	319818197	5.12739e+08	4.19914e+08	61915284	2.43953e+08	1.47313e+08	2.32744e+08	2.10057e+08	2.52622e+08	2.58502e+08	1.08541
P45377	Aldose reductase-related protein 2 OS=Mus musculus OX=10090 GN=Akr1b8 PE=1 SV=2 - [ALD2_MOUSE]	93.04	2	1	30	185	1.79232e+08	8.43613e+07	8.03685e+07	1.28745e+08	4.50754e+07	1.39842e+08	3.10169e+08	37330257	1.65295e+08	3.68122e+07	7.05077e+07	1.29996e+08	4.01968e+08	1.49746e+08	1.45225e+08	2.22563e+08	48697242	2.62472e+08	6.17232e+07	57230143	9.17855e+07	8.28158e+06	4.00137e+07	75837316	1.26234e+08	2.68559e+08	6.38486e+07	5.62927e+07	2.46091e+08	2.76964e+07	3.33702e+08	1.4878e+08	4.37638e+07	7.25551e+08	3.41243e+08	5.00562e+07	1.97999e+08	124410579	1.03556e+08	1.3789e+08	1.79488e+08	1.30537e+08	1.73324
Q8R1B5	Complexin-3 OS=Mus musculus OX=10090 GN=Cplx3 PE=1 SV=1 - [CPLX3_MOUSE]	93.04	2	4	26	100	2.37625e+07	1.79604e+08	1.85872e+07	5.13356e+07	2.364e+07	558124	4.59976e+07	4.69901e+07	5.21359e+07	2.76689e+07	1.45469e+08	3.41323e+07	3.84627e+07	2.99796e+07	0	32897935	0	59103945	12623310	3.448e+07	2.04255e+06	66281572	59309069	5.8711e+07	3.25826e+06	4.2825e+07	8.18e+07	69061512	5.9832e+07	8.74063e+07	9.37202e+07	30379606	6.25872e+07	1.07563e+08	4.46812e+07	1.17754e+07	3.15626e+07	57563721	5.93858e+07	3.46701e+07	4.96086e+07	2.7821e+07	0.835362
Q9D1G1	Ras-related protein Rab-1B OS=Mus musculus OX=10090 GN=Rab1b PE=1 SV=1 - [RAB1B_MOUSE]	93.03	4	4	23	501	2.04165e+09	1.21719e+09	1.06646e+09	1.4367e+09	8.50005e+08	1.87154e+09	1.98527e+09	1357731849	1.31095e+09	6.35332e+08	1360795951	2.17611e+09	1.36491e+09	1.61374e+09	1.22554e+09	1375034895	1.00587e+09	1.11969e+09	1.4788e+09	1.48673e+09	9.75753e+08	1.13488e+09	9.58944e+08	1473894031	1.04006e+09	1.40319e+09	1.89474e+09	1594056914	1.3267e+09	1.51835e+09	9.21306e+08	1.04153e+09	1382656011	1.66065e+09	1.45203e+09	2.8538e+09	1606427927	1.77453e+09	1.3224e+09	1.43217e+09	1.54822e+09	1.29322e+09	1.17076
Q99JG7	TNFAIP3-interacting protein 2 OS=Mus musculus OX=10090 GN=Tnip2 PE=1 SV=1 - [TNIP2_MOUSE]	93.02	1	1	64	207	1.80258e+08	1.61082e+08	3.21199e+08	7.2411e+08	12080723	363332706	1.42432e+08	1.3388e+08	5.619e+07	4.7207e+08	2.08581e+08	1.45734e+08	1.73938e+07	5.2041e+07	3.48939e+07	1.91908e+08	2.30034e+08	4.62533e+07	5.54042e+07	8.34132e+07	1.28598e+08	7.98336e+07	8.30302e+07	5.67493e+08	1.09929e+08	1.45583e+08	1.22524e+08	2.18076e+07	9.68886e+07	200837915	2.54435e+07	1.03037e+08	1.06636e+08	4.18814e+08	1.01218e+08	7.31523e+07	4.43488e+07	1.30336e+08	2.79746e+08	2.33581e+08	9.17287e+07	1.21403e+08	0.3279
Q9CWS0	N(G),N(G)-dimethylarginine dimethylaminohydrolase 1 OS=Mus musculus OX=10090 GN=Ddah1 PE=1 SV=3 - [DDAH1_MOUSE]	92.98	1	20	43	873	9.56014e+08	6.70969e+08	5.67777e+08	6.75716e+08	5.78425e+08	1.41354e+09	766348732	8.64692e+08	8.60352e+08	5.03541e+08	6.51135e+08	9.96082e+08	775486050	1.01492e+09	7.85818e+08	5.77418e+08	7.01946e+08	7.11467e+08	9.01035e+08	1.05318e+09	5.60206e+08	5.93972e+08	7.27437e+08	8.40514e+08	6.33808e+08	9.05955e+08	1.09213e+09	8.74249e+08	1.06787e+09	7.38429e+08	5.4829e+08	7.99082e+08	9.23949e+08	1.0213e+09	7.58557e+08	1.32688e+09	9.9714e+08	1.05698e+09	6.8978e+08	8.81694e+08	8.44689e+08	7.89009e+08	1.22458
Q9Z2D6	Methyl-CpG-binding protein 2 OS=Mus musculus OX=10090 GN=Mecp2 PE=1 SV=1 - [MECP2_MOUSE]	92.98	1	17	83	764	3.4553e+08	3.95408e+08	3.36007e+08	2.25407e+08	1.21484e+08	1.35374e+09	2.12089e+08	4.16691e+08	5.41944e+08	4.4637e+08	2.39229e+08	1.87e+08	389150556	3.717e+08	9.11482e+07	5.43073e+08	3.79025e+08	140180985	1.23953e+08	4.00479e+08	3.06352e+08	3.56479e+08	4.32656e+08	2.50916e+08	1.38121e+08	4.1912e+08	3.7041e+08	1.65608e+08	3.54045e+09	2.48923e+08	1.22248e+08	1.28796e+08	1.51668e+08	1.99069e+08	1.50888e+08	2.01507e+08	3.07631e+08	1.98966e+08	2.84767e+08	5.94166e+08	2.55646e+08	3.17342e+08	0.897735
Q3THW5	Histone H2A.V OS=Mus musculus OX=10090 GN=H2az2 PE=1 SV=3 - [H2AV_MOUSE]	92.97	2	4	18	224	6.74601e+09	3.42303e+09	4.75339e+09	3.8014e+09	2.21332e+09	5.91809e+09	4.45506e+09	2.62912e+09	2.94581e+09	3.29201e+09	3.79087e+09	4.99971e+09	2.52848e+09	4.27207e+09	3.85894e+09	4.64057e+09	2.69449e+09	4.52847e+09	4.19192e+09	4.66987e+09	2.34605e+09	2.78296e+09	4.66764e+09	2.28649e+09	3.67122e+09	4.28161e+09	3.34691e+09	3.351e+09	4.73132e+09	4.17445e+09	2.70993e+09	3.02724e+09	3.63357e+09	6.36452e+09	5.03219e+09	6.03441e+09	4093718242	3.09383e+09	4.18743e+09	3.84802e+09	3.89001e+09	4.14506e+09	0.928974
P67984	60S ribosomal protein L22 OS=Mus musculus OX=10090 GN=Rpl22 PE=1 SV=2 - [RL22_MOUSE]	92.97	1	3	16	164	2.89981e+08	1.3482e+08	6.71129e+08	7.91636e+08	6.01593e+08	7.56138e+08	2.88896e+08	5.20636e+08	8.2981e+08	1.22839e+08	1.75908e+08	2.49914e+08	1.62526e+08	1.08224e+09	9.37797e+08	1.44661e+08	5.4996e+08	7.44849e+08	8.96745e+08	2.83026e+08	2.47591e+08	2.53401e+08	8.05526e+08	1.80284e+08	676355424	2.69497e+08	7.68502e+08	1.00384e+09	1.05751e+09	7.83106e+08	9.05868e+08	2.10313e+08	2.50527e+08	7.33867e+08	6.90543e+08	1.08014e+09	7.99523e+08	2.41058e+08	4.97832e+08	5.03664e+08	5.21677e+08	5.23848e+08	1.0479
Q922J3	CAP-Gly domain-containing linker protein 1 OS=Mus musculus OX=10090 GN=Clip1 PE=1 SV=1 - [CLIP1_MOUSE]	92.95	1	40	198	1278	3.99273e+08	7060119690	1.94726e+08	3.71326e+08	4.96269e+09	1.16737e+10	4.11406e+09	2.98769e+08	20398933494	1.96218e+08	3.86482e+09	13199331514	797516403	2.90613e+08	8.61225e+09	2.3194e+08	3.17444e+08	1.60847e+09	1.24545e+10	1.1181e+10	8.59426e+09	1.05504e+10	2.25113e+08	1.25437e+10	5.82596e+08	6.63541e+08	1.64367e+10	7.3047e+09	2.64281e+09	3.05688e+08	4.35947e+09	3.30738e+08	6.5774e+08	6.68559e+09	3.884e+09	13390564505	1.18241e+10	3633961452	2.59763e+09	7.33634e+09	5.35291e+09	5.15867e+09	2.06069
Q9CRA5	Golgi phosphoprotein 3 OS=Mus musculus OX=10090 GN=Golph3 PE=1 SV=1 - [GOLP3_MOUSE]	92.95	2	4	38	187	3.57939e+08	17559752	1.84427e+08	2.51108e+08	1.94873e+08	8.10611e+07	1.04561e+08	9.42613e+07	7.313e+07	1.61832e+08	1.59096e+08	2.2072e+08	5.7203e+07	6.63476e+06	8.29646e+07	3.56183e+07	6.69792e+07	2.49835e+08	2.18357e+08	3.8497e+08	5.15759e+07	7.17889e+07	3.07271e+08	1.35786e+08	3.48651e+07	4.68314e+07	3.37123e+07	1.31697e+08	5.10137e+07	2.30185e+08	2.39749e+08	6.54899e+07	8.18244e+07	7.1117e+07	8.23993e+07	2.21121e+07	5.46874e+07	1.30152e+08	2.01181e+08	1.02969e+08	1.05324e+08	1.91152e+08	0.523526
Q91Z61	GTP-binding protein Di-Ras1 OS=Mus musculus OX=10090 GN=Diras1 PE=1 SV=1 - [DIRA1_MOUSE]	92.93	1	5	28	170	5.1809e+07	2.30243e+09	1829449825	2.2349e+09	1.03661e+08	1.88968e+08	1.4141e+08	1.45652e+08	1.2936e+09	5.85569e+07	1.77118e+08	2975954729	1372596753	1.64955e+08	5.9302e+07	1.27766e+09	2.837e+09	2.21723e+09	1.14857e+08	3.60842e+07	3.50659e+07	1.6789e+09	9.45102e+07	1.57732e+09	1874298069	86164587	3289872570	1.5249e+09	1.30646e+08	9.90386e+07	1.24628e+09	1.08158e+08	68670667	5.03354e+09	2.16349e+08	4.74164e+09	2.04238e+09	1.93591e+09	1.30445e+09	3.65637e+08	9.49985e+08	1.29657e+09	0.728266
Q8VD04	GRIP1-associated protein 1 OS=Mus musculus OX=10090 GN=Gripap1 PE=1 SV=1 - [GRAP1_MOUSE]	92.93	2	31	110	796	1.2242e+08	1.3374e+08	1.49742e+08	1.90241e+08	1.05803e+08	3.306e+08	2.75251e+08	1.73461e+09	408815963	172528726	3.3887e+08	1.38841e+09	2.39413e+08	3.38101e+08	1.35965e+09	2.65639e+08	1.56645e+08	184617450	7.36919e+08	3.13214e+08	1.81132e+08	1.84691e+08	2.64612e+08	1.1194e+08	1.83913e+09	1.29708e+09	3.20125e+08	185141445	6.24436e+08	2.474e+08	4.94878e+08	2.16929e+08	609024653	2.13534e+08	3.93185e+08	291215392	2.0458e+08	2.19455e+08	1.40389e+08	5.84361e+08	7.32889e+08	3.31407e+08	5.22041
P48024	Eukaryotic translation initiation factor 1 OS=Mus musculus OX=10090 GN=Eif1 PE=1 SV=2 - [EIF1_MOUSE]	92.92	1	2	11	133	0	1.10753e+08	1.1577e+08	1.31676e+08	8.7742e+07	9.03647e+07	1.95615e+08	1.97839e+08	1.35554e+08	7.93101e+07	5.57869e+07	2.33332e+08	1.21615e+08	1.55038e+08	1.03238e+08	9.76712e+07	1.60011e+08	1.15968e+08	1.72393e+08	153014142	7.97737e+07	1.31178e+08	1.1423e+08	1.27415e+08	50887457	1.9695e+08	2.27792e+08	1.45589e+08	1.6316e+08	1.58796e+08	5.92379e+07	1.26978e+08	1.36716e+08	1.28061e+08	1.4738e+08	2.40721e+08	1.73928e+08	1.85414e+08	8.91884e+07	1.39737e+08	1.33802e+08	1.39811e+08	1.50022
P57780	Alpha-actinin-4 OS=Mus musculus OX=10090 GN=Actn4 PE=1 SV=1 - [ACTN4_MOUSE]	92.87	2	26	116	1482	5.82157e+08	4.96279e+08	4.41219e+08	6.39424e+08	3.96876e+08	5.85142e+08	5.50138e+08	6.32685e+08	730878383	7.47834e+08	4.92634e+08	6.93732e+08	6.6148e+08	1.34083e+09	5.84956e+08	4.30106e+08	4.8985e+08	5.93237e+08	6.74622e+08	8.54067e+08	4.58855e+08	4.44424e+08	7.37069e+08	5.02838e+08	460676627	4.88937e+08	7.74578e+08	6.61085e+08	1.17837e+09	5.50031e+08	5.78442e+08	7.09891e+08	1.54864e+09	8.37e+08	5.11868e+08	9.13307e+08	6.90695e+08	6.72269e+08	5.11191e+08	6.49336e+08	7.54726e+08	6.08377e+08	1.47641
Q8CGP0	Histone H2B type 3-B OS=Mus musculus OX=10090 GN=H2bu1 PE=1 SV=3 - [H2B3B_MOUSE]	92.86	3	3	18	686	8.96096e+09	7.0866e+09	6.69081e+09	5.23319e+09	3.35196e+09	9.16632e+09	9.0074e+09	4.87891e+09	4.09195e+09	3.65686e+09	7.22241e+09	8.67659e+09	3287729986	5.31054e+09	5.13993e+09	6.81292e+09	5.2389e+09	5.74273e+09	5.32906e+09	6.3438e+09	4.28049e+09	4.2209e+09	6.25361e+09	4.19177e+09	5.57746e+09	8.02546e+09	6.35608e+09	4.73723e+09	6.36514e+09	7.77555e+09	3.26994e+09	3.75399e+09	4.50186e+09	1.08851e+10	8.87857e+09	1.1296e+10	5.75123e+09	5.49231e+09	6.26471e+09	6.16029e+09	5.92744e+09	5.89348e+09	0.946164
Q9WV69	Dematin OS=Mus musculus OX=10090 GN=Dmtn PE=1 SV=1 - [DEMA_MOUSE]	92.84	3	13	50	610	3.31711e+08	1.37816e+08	2.16102e+08	2.9283e+08	1.95215e+08	2.34237e+08	3.50563e+08	2.98963e+08	3.78332e+08	1.99091e+08	2.86276e+08	3.90697e+08	239125873	3.81733e+08	2.92567e+08	4.40554e+08	2.60261e+08	2.75972e+08	3.33908e+08	4.65656e+08	2.77568e+08	2.94789e+08	3.039e+08	2.55829e+08	3.02771e+08	2.76692e+08	4.41935e+08	4.59591e+08	5.1018e+08	3.11153e+08	3.1145e+08	4.28115e+08	4.14648e+08	3.78109e+08	3.08667e+08	4.86459e+08	3.40976e+08	4.23624e+08	2.34735e+08	2.92237e+08	3.1808e+08	3.5527e+08	1.35506
P97427	Dihydropyrimidinase-related protein 1 OS=Mus musculus OX=10090 GN=Crmp1 PE=1 SV=1 - [DPYL1_MOUSE]	92.83	1	27	58	2204	9.84284e+09	5.55761e+09	4.53469e+09	5.62003e+09	3.91362e+09	9.50532e+09	8.02062e+09	6.49415e+09	6.03667e+09	3.55748e+09	7.57141e+09	9.84791e+09	5.26466e+09	7.74558e+09	5.73785e+09	5.84612e+09	6.23724e+09	5.29496e+09	6.53458e+09	7.70361e+09	5.09449e+09	6.03957e+09	5.12048e+09	6.64022e+09	6.98887e+09	7.05559e+09	9.05163e+09	6.3167e+09	7.46928e+09	6.6543e+09	5.03115e+09	6.23618e+09	6.89316e+09	9.38136e+09	6.7304e+09	11094406238	7.31849e+09	7.16241e+09	5.89376e+09	6.72285e+09	7.23348e+09	6.3233e+09	1.22731
Q03141	MAP/microtubule affinity-regulating kinase 3 OS=Mus musculus OX=10090 GN=Mark3 PE=1 SV=2 - [MARK3_MOUSE]	92.83	2	1	104	538	2.33361e+08	8.02509e+08	2.14769e+08	2.41647e+08	5.34523e+08	1.88427e+08	2.57917e+08	2.35481e+08	2.77945e+08	1.57959e+08	2.28998e+08	1.16455e+08	9.47637e+07	9.90663e+08	6.35566e+08	191514405	2.47115e+08	2.09492e+08	2.68631e+08	7.66153e+08	1.10855e+08	2.55014e+08	1.86661e+08	2.36663e+08	2.15492e+08	1.00544e+08	7.25723e+07	9.14137e+08	3.68732e+08	221892518	3.45749e+08	2.88326e+08	1.90512e+08	2.84846e+08	2.97551e+08	397732265	2.88841e+08	9.27478e+07	4.05362e+08	2.23546e+08	4.13289e+08	3.36581e+08	1.01956
Q6P3D0	U8 snoRNA-decapping enzyme OS=Mus musculus OX=10090 GN=Nudt16 PE=1 SV=1 - [NUD16_MOUSE]	92.82	1	2	27	90	24298485	2.06774e+09	1.02682e+09	2.16213e+07	5.1289e+07	1.1254e+08	1.2794e+09	1.23647e+09	1.15443e+07	1.09711e+07	24347196	39509203	9.48157e+08	2.19699e+09	1.22984e+07	4.28184e+07	2.23502e+07	2.21038e+07	2.75151e+09	1.03602e+09	173519326	4.44345e+07	6.97072e+08	0	6.01128e+07	6.01532e+07	1.00779e+09	1.29444e+09	9.81863e+08	2.52441e+07	9.94567e+08	1.20021e+09	4297727348	8.96774e+08	1.61652e+07	1.35755e+09	9.82695e+08	0	6.38353e+08	5.30186e+08	6.44259e+08	7.7496e+08	1.00925
P61922	4-aminobutyrate aminotransferase, mitochondrial OS=Mus musculus OX=10090 GN=Abat PE=1 SV=1 - [GABT_MOUSE]	92.8	1	24	57	1037	1.07588e+09	8.37466e+08	717522909	8.59318e+08	5.62455e+08	1.23157e+09	1.06467e+09	1.18616e+09	674848956	5.61119e+08	1.03871e+09	1320837559	7.70729e+08	8.6418e+08	7.57462e+08	1.02124e+09	8.81206e+08	7.61588e+08	1.05909e+09	1.00765e+09	8.43112e+08	8.87759e+08	7.18204e+08	9.47085e+08	7.56055e+08	1.01129e+09	1.02913e+09	8.86655e+08	9.62444e+08	8.29557e+08	727475683	9.49441e+08	1.09154e+09	1468026487	9.06918e+08	1.79586e+09	1.42853e+09	1.45375e+09	8.10529e+08	9.43673e+08	9.50384e+08	9.46154e+08	1.17255
P70122	Ribosome maturation protein SBDS OS=Mus musculus OX=10090 GN=Sbds PE=1 SV=4 - [SBDS_MOUSE]	92.8	1	6	42	120	7.98966e+07	7.73119e+07	0	3.85529e+07	9.05557e+07	3.78784e+06	1.19041e+08	3.94742e+07	2.29728e+08	5.78111e+07	2.42178e+07	3.02765e+07	3.51092e+06	6.14374e+06	5.91844e+07	2.42798e+08	116219965	0	8.50663e+07	1.74855e+08	1.19182e+07	1.43376e+09	5.153e+06	9.86242e+07	24921200	1.72132e+06	9.62003e+07	109064530	4.41156e+07	2.21236e+07	5.30252e+07	2.99468e+07	8.04389e+07	1.24917e+09	3.44057e+07	3.29067e+07	59443083	1.3297e+08	5.72634e+07	8.99684e+07	2.46667e+07	1.23788e+08	0.430758
P62242	40S ribosomal protein S8 OS=Mus musculus OX=10090 GN=Rps8 PE=1 SV=2 - [RS8_MOUSE]	92.79	1	8	33	287	3.51629e+08	4.87609e+08	5.34196e+08	3.70915e+08	2.63462e+08	6.94231e+08	9.0928e+08	210059625	2.92625e+08	4.54652e+08	696374164	8.02519e+08	2.95842e+08	4.5385e+08	4.81983e+08	619271337	4.93839e+08	6.41421e+08	7.28827e+08	3.52294e+08	5.40617e+08	3.20927e+08	3.19915e+08	4.60508e+08	2.96634e+08	6.51132e+08	9.09215e+08	1.30367e+10	491559262	7.55171e+08	5.13876e+08	2.88449e+08	3.51282e+08	4.15486e+08	3.38523e+08	8.52422e+08	5.48471e+08	5.23925e+08	4.01562e+08	5.1217e+08	5.46114e+08	5.67131e+08	1.35997
P08030	Adenine phosphoribosyltransferase OS=Mus musculus OX=10090 GN=Aprt PE=1 SV=2 - [APT_MOUSE]	92.78	1	6	17	177	6.53645e+07	1.17051e+08	8.84762e+07	1.46745e+08	7.15387e+07	30819325	6.53675e+07	4.52755e+07	3.0152e+07	1.92474e+07	1.66051e+08	4.38463e+07	9.96861e+07	5.51045e+07	7.50769e+07	3.56988e+07	2.71114e+07	9.31676e+07	7.30758e+07	5.93538e+07	1.08237e+08	2.94461e+07	4.60477e+07	2.1568e+08	4.23401e+07	4.67632e+07	1.18038e+08	6.49365e+07	6.88981e+07	3.55679e+07	2.87884e+07	3.1131e+07	8.42441e+07	138726054	5.24277e+07	1.01637e+08	1.03946e+08	1.99417e+08	9.78353e+07	3.81723e+07	8.7953e+07	5.76815e+07	0.898991
Q99L45	Eukaryotic translation initiation factor 2 subunit 2 OS=Mus musculus OX=10090 GN=Eif2s2 PE=1 SV=1 - [IF2B_MOUSE]	92.75	1	11	58	343	1.30671e+08	1.34088e+08	1.06532e+08	1.02521e+08	79402103	98202149	2.74954e+08	7.57125e+07	1.02776e+08	7.21537e+07	7.95425e+07	1.67325e+08	9.2191e+07	2.80242e+08	2.25652e+08	5.28248e+07	1.18913e+08	95293258	2.43202e+08	2.3889e+08	3.47426e+07	4.44986e+07	8.82003e+07	2.56324e+08	4.03236e+07	8.84522e+07	3.62235e+08	167498159	2.27463e+08	8.72873e+07	1.21637e+08	147652778	1.26213e+08	8.31077e+07	8.97698e+07	1.88311e+08	7.60193e+07	1.05284e+08	1.10643e+08	1.2476e+08	1.68991e+08	1.49825e+08	1.52735
Q9CPW4	Actin-related protein 2/3 complex subunit 5 OS=Mus musculus OX=10090 GN=Arpc5 PE=1 SV=3 - [ARPC5_MOUSE]	92.72	1	6	20	151	4.96185e+08	2.79626e+08	2.13172e+08	2.5562e+08	2.01488e+08	430151605	3.83251e+08	3.4942e+08	3.30778e+08	1.83254e+08	4.49827e+08	2.01461e+09	2.1672e+08	3.61665e+08	2.81695e+08	2.86773e+08	312051677	2.5464e+08	2.84492e+08	1.14822e+09	2.77203e+08	2.86106e+08	2.82094e+08	311375970	351249044	3.04816e+08	4.4528e+08	6.73886e+08	7.59796e+08	3.50326e+08	2.74983e+08	3.37719e+08	7.43233e+08	339572305	3.24943e+08	3.76328e+08	3.96651e+08	3.90625e+08	2.89218e+08	3.35371e+08	6.64903e+08	4.57236e+08	2.29897
Q9JM76	Actin-related protein 2/3 complex subunit 3 OS=Mus musculus OX=10090 GN=Arpc3 PE=1 SV=3 - [ARPC3_MOUSE]	92.7	1	10	19	409	1.10708e+09	5.70755e+08	4.99689e+08	6.2329e+08	4.68197e+08	9.41383e+08	9.28743e+08	7.35695e+08	7.19243e+08	4.88026e+08	8.65942e+08	1.00216e+09	5.62768e+08	8.08647e+08	585408323	6.54832e+08	7.03389e+08	5.9756e+08	7.30765e+08	1.01135e+09	592099725	6.10877e+08	5.70509e+08	6.66688e+08	7.40559e+08	7.26868e+08	9.84768e+08	7.27984e+08	8.44223e+08	6.94174e+08	6.17066e+08	7.60971e+08	8.781e+08	9.45277e+08	7.63915e+08	1.09752e+09	7.77108e+08	8.26858e+08	6.53803e+08	7.62618e+08	7.64986e+08	7.39579e+08	1.17006
Q61686	Chromobox protein homolog 5 OS=Mus musculus OX=10090 GN=Cbx5 PE=1 SV=1 - [CBX5_MOUSE]	92.67	1	7	30	140	6.29482e+07	5.83103e+07	2.55465e+08	625622849	2.05126e+07	41891880	3.57102e+07	6.0083e+07	2.24915e+08	0	6.8937e+07	8.02643e+07	1.11613e+08	4.50796e+08	0	1.23956e+08	4.48681e+07	2.18209e+07	3.73306e+08	850481437	3.6625e+07	103931405	2.04416e+07	4.36861e+07	3.81098e+08	3.31651e+08	196141021	3.30173e+08	1.3004e+08	3.15598e+08	2.53961e+08	317923135	3.38262e+08	9.05191e+07	4.4883e+07	7.68457e+08	2.46153e+07	0	2.04572e+08	7.25199e+07	1.42322e+08	2.82887e+08	0.695707
Q80W21	Glutathione S-transferase Mu 7 OS=Mus musculus OX=10090 GN=Gstm7 PE=1 SV=1 - [GSTM7_MOUSE]	92.66	1	4	26	256	1.33646e+09	1.02337e+09	1.05341e+09	1.40268e+09	1135801723	1.35785e+09	1.86012e+09	1.19472e+09	1.0071e+09	8.61825e+08	1.6134e+09	1.76088e+09	1.0525e+09	1614089054	1.42167e+09	1.41644e+09	1.21938e+09	1293955494	1.49368e+09	1.15541e+09	1.14402e+09	7.84553e+08	1192641233	1.03335e+09	1.43122e+09	1.60008e+09	1.82968e+09	1.35975e+09	1.28646e+09	1.42517e+09	1.10936e+09	1279464849	1.63787e+09	1.87653e+09	1.58239e+09	2.43232e+09	1.50024e+09	1.60132e+09	1.19034e+09	1.25632e+09	1.49251e+09	1.31577e+09	1.25385
Q99LD8	N(G),N(G)-dimethylarginine dimethylaminohydrolase 2 OS=Mus musculus OX=10090 GN=Ddah2 PE=1 SV=1 - [DDAH2_MOUSE]	92.63	1	10	27	273	5.83676e+08	2.73462e+08	1.91308e+08	3.90337e+08	2.1142e+08	6.33495e+08	1.08066e+09	5.14793e+08	2.36218e+08	1.57358e+08	6.48947e+08	6.9677e+08	3.02131e+08	4.35315e+08	5.20961e+08	301620913	1.09991e+09	2.421e+08	3.82713e+08	4.98466e+08	7.86354e+08	2.58831e+08	2.07064e+08	4.17138e+08	2.92847e+08	649465139	5.10907e+08	1.06552e+09	6.86555e+08	3.00237e+08	2.84533e+08	3.99711e+08	5.05545e+08	5.59697e+08	459080616	7.28515e+08	4.30211e+08	5.63883e+08	3.30041e+08	5.24504e+08	5.20825e+08	5.04963e+08	1.57806
Q9Z2D8	Methyl-CpG-binding domain protein 3 OS=Mus musculus OX=10090 GN=Mbd3 PE=1 SV=1 - [MBD3_MOUSE]	92.63	1	5	38	202	1.26584e+08	3.94264e+08	2.76463e+09	3.36614e+09	2.10617e+09	4.05789e+09	525718727	2.95581e+08	3.39911e+09	2.74002e+08	3.08277e+07	5.28334e+08	3.62145e+08	3.60172e+09	2.04437e+09	139316250	2.0282e+09	3.80399e+08	3.5866e+09	3.80209e+09	1.83897e+09	4.23816e+08	4.3536e+08	3.2171e+08	3.03854e+07	2.27346e+09	4.37162e+07	2.77781e+09	1.3439e+08	1.29776e+09	2.43889e+09	2.35647e+09	2.2058e+09	3.61067e+09	3.26599e+08	2.25222e+09	1.77215e+08	4.99227e+09	1.75156e+09	1.71046e+09	1.31348e+09	1.98732e+09	0.749892
P08551	Neurofilament light polypeptide OS=Mus musculus OX=10090 GN=Nefl PE=1 SV=5 - [NFL_MOUSE]	92.63	1	27	92	880	4.01927e+08	180894213	2.02174e+08	4.14614e+08	2.99614e+08	5.99118e+08	7.84413e+08	3.65332e+08	4.72424e+08	1.74938e+08	3.06637e+08	6.55809e+08	3.13387e+08	5.43264e+08	3.45624e+08	2.53261e+08	4.39126e+08	2.41707e+08	5.2572e+08	4.76439e+08	2.39221e+08	3.65254e+08	3.07051e+08	2.02852e+08	3.83094e+08	600421488	5.51553e+08	4.73742e+08	516443660	6.21512e+08	2.89954e+08	3.15838e+08	3.25912e+08	7.65362e+08	4.62177e+08	1.13778e+09	3.02873e+08	3.28649e+08	2.99845e+08	4.79245e+08	4.32944e+08	3.87251e+08	1.4439
Q8CJ67	Double-stranded RNA-binding protein Staufen homolog 2 OS=Mus musculus OX=10090 GN=Stau2 PE=1 SV=1 - [STAU2_MOUSE]	92.63	1	2	82	312	526198899	3.58528e+08	3.25305e+08	5.41943e+08	3.11845e+08	5.13708e+08	463297654	3.78267e+08	3.25622e+08	4.02684e+08	2.74777e+08	6.79559e+08	5.91903e+07	480506901	176172663	1.14547e+09	2.44524e+08	1.02307e+09	5.32296e+08	2.83184e+08	5.12738e+08	3.0999e+08	304525393	5.85672e+08	4.37465e+08	5.2737e+08	564550650	3.11502e+08	4.59927e+08	4.20122e+08	1.24522e+09	5.78174e+08	2.70671e+08	558768962	5.83831e+08	7.3476e+08	4.04604e+08	1.83142e+08	4.12764e+08	4.16716e+08	3.34041e+08	6.45708e+08	0.809279
Q8R0P4	Mth938 domain-containing protein OS=Mus musculus OX=10090 GN=Aamdc PE=1 SV=1 - [AAMDC_MOUSE]	92.62	1	3	17	110	7554821536	2.32678e+09	1.63968e+09	3.01487e+09	2.13082e+09	245313542	2935540077	140450726	2891443669	1.18533e+09	236140606	1.97244e+08	3.19461e+07	1.99091e+08	2.07504e+09	221918149	9.16988e+07	1.78337e+09	215193356	2.76646e+09	2.69038e+09	3262688933	2396163910	3.31017e+07	2.13622e+09	2.77635e+09	7.02516e+07	2.06812e+09	3.48183e+09	3.51931e+09	1.48976e+08	1.33715e+08	2.69499e+08	11283224672	2.22164e+09	3.22532e+08	1.65007e+08	2.74945e+09	3.3334e+09	1.47961e+09	5.47892e+08	1.01573e+09	0.164365
Q9CQE8	RNA transcription, translation and transport factor protein OS=Mus musculus OX=10090 GN=RTRAF PE=1 SV=1 - [RTRAF_MOUSE]	92.62	2	11	27	447	2.00737e+08	1.43804e+08	1.31075e+08	1.58967e+08	1.11054e+08	2.00048e+08	2.08765e+08	1.51929e+08	1.44503e+08	7.82547e+07	171332669	2.33313e+08	1.46578e+08	1.92137e+08	1.8198e+08	1.5178e+08	149472837	1.47463e+08	1.59066e+08	2.09576e+08	1.24797e+08	1.21458e+08	1.67269e+08	1.35286e+08	1.4027e+08	1.75806e+08	2.4639e+08	1.89284e+08	2.3901e+08	172392038	1.11483e+08	1.80907e+08	1.70683e+08	2.41748e+08	1.68084e+08	3.41946e+08	1.49782e+08	2.03708e+08	1.49127e+08	1.567e+08	1.85068e+08	1.63472e+08	1.24101
P40142	Transketolase OS=Mus musculus OX=10090 GN=Tkt PE=1 SV=1 - [TKT_MOUSE]	92.62	2	34	65	1486	1.67684e+09	9.14908e+08	8.39337e+08	973374080	7.06216e+08	1.49479e+09	1.38037e+09	9.6299e+08	1.05507e+09	7.83206e+08	1.34441e+09	1.52571e+09	9.45627e+08	1.35687e+09	1.03179e+09	1.06916e+09	9.95034e+08	9.54702e+08	1.15314e+09	1548223144	1.02182e+09	1.0499e+09	9.26375e+08	8.96324e+08	1.27763e+09	1.11898e+09	1.36329e+09	1.12169e+09	1.38258e+09	1.2483e+09	8.03418e+08	1.13192e+09	1.27497e+09	1499306476	1.12929e+09	1.82186e+09	1.16052e+09	1068776956	1.02214e+09	1.13528e+09	1.24088e+09	1.14405e+09	1.21401
P62908	40S ribosomal protein S3 OS=Mus musculus OX=10090 GN=Rps3 PE=1 SV=1 - [RS3_MOUSE]	92.59	1	15	37	480	4.62208e+08	3.19638e+08	3.09562e+08	3.87842e+08	2.77234e+08	3.89886e+08	4.10422e+08	3.72736e+08	3.9122e+08	2.6475e+08	3.04468e+08	4.94536e+08	324243747	534660821	3.79249e+08	2.89412e+08	3.27407e+08	3.09161e+08	4.60458e+08	5.50115e+08	3.09734e+08	3.79916e+08	2.77438e+08	3.95205e+08	2.86727e+08	4.15729e+08	5.0416e+08	340116138	4.26595e+08	3.62136e+08	2.9939e+08	3.16383e+08	7.37927e+08	4.26608e+08	3.13263e+08	5.24903e+08	4.41633e+08	4.85829e+08	3.51297e+08	3.65803e+08	4.07431e+08	3.87311e+08	1.15979
P62334	26S proteasome regulatory subunit 10B OS=Mus musculus OX=10090 GN=Psmc6 PE=1 SV=1 - [PRS10_MOUSE]	92.54	1	22	61	512	2.3482e+08	2.19393e+08	1.92167e+08	2.37058e+08	162435101	2.93453e+08	266933407	2.57452e+08	2.23662e+08	1.24033e+08	2.54402e+08	3.21779e+08	2.15783e+08	2.69348e+08	2.50174e+08	1.66035e+08	2.12589e+08	2.2672e+08	2.59768e+08	2.9757e+08	1.60644e+08	2.0357e+08	2.2215e+08	232960404	2.2078e+08	2.41487e+08	3.22473e+08	234072305	2.69221e+08	2.28558e+08	1.83296e+08	2.44099e+08	2.61013e+08	318613584	2.26424e+08	4.3083e+08	2.15236e+08	2.82036e+08	2.09174e+08	2.33107e+08	2.62297e+08	2.32536e+08	1.25396
Q99KJ8	Dynactin subunit 2 OS=Mus musculus OX=10090 GN=Dctn2 PE=1 SV=3 - [DCTN2_MOUSE]	92.54	1	22	41	855	6.98958e+08	5.96935e+08	4.81567e+08	6.47637e+08	3.91656e+08	8.03797e+08	7.16541e+08	7.63213e+08	6.12799e+08	3.55681e+08	646924432	9.76234e+08	5.58629e+08	7.91155e+08	5.25445e+08	5.41688e+08	6.53629e+08	5.50547e+08	7.38985e+08	7.57984e+08	4.9002e+08	5.39259e+08	577263534	7.37907e+08	5.65274e+08	6.4473e+08	9.36985e+08	6.01264e+08	7.64786e+08	6.7509e+08	4.62287e+08	6.68769e+08	7.69956e+08	876668425	5.99518e+08	1.30993e+09	7.34247e+08	8.10365e+08	5.63351e+08	6.50406e+08	6.99677e+08	6.48567e+08	1.24199
P02088	Hemoglobin subunit beta-1 OS=Mus musculus OX=10090 GN=Hbb-b1 PE=1 SV=2 - [HBB1_MOUSE]	92.52	2	11	18	1600	3.69356e+10	2.2351e+10	1.30889e+10	17697734675	1.72675e+10	34764215538	2.27315e+10	3.87356e+10	20630388445	15956198063	22028116790	3.16867e+10	1.68721e+10	3.03513e+10	2.01839e+10	2.24597e+10	4.35115e+10	3.64084e+10	4.58029e+10	27353601565	15572022538	2.1355e+10	1.71407e+10	2.08813e+10	17505142237	1.80686e+10	2.63775e+10	2.49666e+10	2.14814e+10	2.40932e+10	1.66327e+10	2.47506e+10	2.47927e+10	2.39497e+10	2.18293e+10	3.88565e+10	27221648880	2.53631e+10	2.14681e+10	2.65636e+10	2.42244e+10	3.51072e+10	1.12839
Q9DBJ1	Phosphoglycerate mutase 1 OS=Mus musculus OX=10090 GN=Pgam1 PE=1 SV=3 - [PGAM1_MOUSE]	92.52	1	16	35	1771	6.0937e+09	5.12893e+09	3.69859e+09	4.82812e+09	3.22893e+09	7.30495e+09	6548294376	5617582342	4828339554	2.97481e+09	5.38683e+09	8644390476	3.91113e+09	6.02083e+09	4.53568e+09	4.56767e+09	5.6006e+09	4.1827e+09	5.30312e+09	6.08611e+09	4.2171e+09	5052350962	3.91929e+09	5.195e+09	5.05486e+09	5948821452	7508046628	5.03485e+09	5.68504e+09	5345004372	3913072288	4.80528e+09	5474021320	8.15711e+09	5038267280	9.50228e+09	5.10093e+09	6365836907	4.59565e+09	5.4548e+09	5.69977e+09	5.14804e+09	1.24025
P70236	Dual specificity mitogen-activated protein kinase kinase 6 OS=Mus musculus OX=10090 GN=Map2k6 PE=1 SV=1 - [MP2K6_MOUSE]	92.51	1	6	38	215	5.64431e+07	8.69211e+07	2.30433e+08	8.49381e+07	6.81819e+07	2.53442e+07	5.87158e+08	98807757	7.65144e+07	5.38499e+07	8.48113e+08	8.46282e+08	8.31377e+07	4.09039e+08	1.83252e+08	4.35011e+08	1004594421	9.06601e+07	1.39184e+08	1.5089e+08	1073684978	1.24502e+08	7.10245e+07	6.84466e+07	4.01853e+08	5.1866e+08	1.05614e+08	6.8495e+07	5.93957e+07	1.12246e+08	3.77328e+07	9.14605e+07	5.8442e+08	7.10332e+08	6.46414e+07	5.95282e+07	8.10699e+07	9.21e+07	1.05383e+08	1.68335e+08	4.73965e+08	3.64068e+08	4.49753
Q9ES28	Rho guanine nucleotide exchange factor 7 OS=Mus musculus OX=10090 GN=Arhgef7 PE=1 SV=2 - [ARHG7_MOUSE]	92.46	1	25	91	532	1.91567e+08	1.4097e+08	8.50655e+07	1.09027e+08	7.52867e+07	1.86274e+08	2.43962e+08	1.40945e+08	1.68e+08	7.27336e+07	2.02603e+08	2.25428e+08	9.54435e+07	1.32373e+08	1.60333e+08	1.96346e+08	1.19137e+08	1.18306e+08	1.14085e+08	1.29664e+08	1.45337e+08	1.21855e+08	4.91539e+08	9.28593e+07	1.19639e+08	1.24293e+08	2.2372e+08	417604155	7.39333e+08	1.32255e+08	5.04284e+08	1.42423e+08	1.74735e+08	1.99182e+08	3.1173e+08	2.31831e+08	1.00391e+08	1.37047e+08	1.20383e+08	1.62383e+08	1.63236e+08	1.35508e+08	1.35597
Q9Z1M8	Protein Red OS=Mus musculus OX=10090 GN=Ik PE=1 SV=2 - [RED_MOUSE]	92.46	1	3	83	506	8.53132e+08	5.66501e+08	4.52693e+08	4.16672e+08	3.24039e+08	480101971	623504557	3.41487e+08	5.93876e+08	4.19684e+08	3.31263e+08	4.58688e+08	2.71373e+08	1.48118e+08	7.34391e+08	4.29614e+08	3.08808e+08	3.58531e+08	5.66026e+08	9.60225e+08	3.394e+08	2.70633e+08	3.41178e+08	2.48455e+08	4.32339e+08	1.49953e+08	5.56502e+08	5.78726e+08	8.02212e+08	4.1795e+08	3.03174e+08	3.93654e+08	500943902	2.91285e+08	1.30918e+08	1.30564e+09	7.47231e+08	4.26145e+08	5.22607e+08	4.91731e+08	3.88767e+08	5.24641e+08	0.743898
O70311	Glycylpeptide N-tetradecanoyltransferase 2 OS=Mus musculus OX=10090 GN=Nmt2 PE=1 SV=1 - [NMT2_MOUSE]	92.44	1	12	61	367	3.95909e+08	1.77898e+08	6.6939e+07	1.68689e+08	5.67171e+07	1.63105e+08	1.27462e+08	1.38316e+08	1.59769e+08	1.00803e+08	3.72754e+08	1.24551e+08	1.80213e+08	5.64223e+08	4.05576e+08	1.72553e+08	9.53924e+07	8.54672e+07	1.56276e+08	5.10811e+08	1.50691e+08	4.53507e+08	8.21604e+07	9.47027e+07	3.98434e+08	3.799e+08	795831913	4.06861e+08	4.90842e+08	1.34932e+08	7.092e+07	1.36905e+08	1.5593e+08	2.19078e+08	1.72928e+08	6.2816e+08	2.34721e+08	1.49881e+08	1.7323e+08	1.37891e+08	3.29463e+08	2.041e+08	1.90188
Q66JS6	Eukaryotic translation initiation factor 3 subunit J-B OS=Mus musculus OX=10090 GN=Eif3j2 PE=1 SV=1 - [EI3JB_MOUSE]	92.4	2	11	34	344	2.9805e+08	2.62084e+08	2.49918e+08	2.98561e+08	2.19424e+08	3.42664e+08	3.73383e+08	3.32404e+08	3.43651e+08	1.4849e+08	2.37509e+08	3.65292e+08	280385417	3.87012e+08	3.38573e+08	2.25219e+08	1.18388e+08	2.34511e+08	3.42412e+08	3.72063e+08	267856479	138951031	2.45366e+08	3.3051e+08	2.69333e+08	2.58522e+08	4.60669e+08	3.24474e+08	3.73467e+08	3.42423e+08	2.42853e+08	1.2819e+08	3.49638e+08	3.51946e+08	239868597	8.12332e+08	3.05142e+08	3.51636e+08	2.65607e+08	3.08118e+08	3.21754e+08	2.58519e+08	1.21139
Q9CWJ9	Bifunctional purine biosynthesis protein ATIC OS=Mus musculus OX=10090 GN=Atic PE=1 SV=2 - [PUR9_MOUSE]	92.4	1	28	74	730	3.02037e+08	1.43501e+08	1.27852e+08	1.78333e+08	1.49598e+08	3.23222e+08	1.71193e+08	2.57919e+08	2.01426e+08	8.00586e+07	187188862	2.19204e+08	1.11914e+08	2.03622e+08	1.35654e+09	1.08508e+08	2.03975e+08	3.08809e+08	4.47945e+08	2.71489e+08	1.07972e+08	1.13668e+08	157725220	1.8766e+08	1.44297e+08	2.42335e+08	1.78927e+08	1.63315e+08	2.25952e+08	1.50476e+08	1.58488e+08	1.67696e+08	225602489	2.31899e+08	188469398	2.61376e+08	2.0746e+08	221126378	1.80265e+08	2.06764e+08	4.15694e+08	2.68145e+08	2.30602
P70441	Na(+)/H(+) exchange regulatory cofactor NHE-RF1 OS=Mus musculus OX=10090 GN=Slc9a3r1 PE=1 SV=3 - [NHRF1_MOUSE]	92.39	1	16	39	524	5.72616e+08	5.318e+08	2.5941e+08	3.72133e+08	1.74733e+08	793629153	3.54887e+08	5.53052e+08	4.26348e+08	3.52368e+08	3.60923e+08	6.71542e+08	3.86315e+08	5.55974e+08	2.69023e+08	2.48152e+08	2.29709e+08	2.58556e+08	5.30112e+08	4.37671e+08	4.04015e+08	2.31471e+08	2.56e+08	3.62364e+08	2.73407e+08	2.74565e+08	7.08651e+08	3.85643e+08	3.97608e+08	2.17048e+08	2.98233e+08	3.36744e+08	589403593	2.89709e+08	2.30736e+08	6.07846e+08	6.02055e+08	8.27955e+08	3.82138e+08	4.96057e+08	4.48755e+08	3.4084e+08	1.17433
P97371	Proteasome activator complex subunit 1 OS=Mus musculus OX=10090 GN=Psme1 PE=1 SV=2 - [PSME1_MOUSE]	92.37	1	11	38	267	1.15656e+08	7.00939e+07	8.74936e+07	7.39346e+07	7.87963e+07	1.74054e+08	1.27704e+08	1.25426e+08	9.07593e+07	8.60744e+07	145542136	1.44333e+08	1.03048e+08	1.19093e+08	7.72868e+07	8.13357e+07	1.058e+08	1.27127e+08	7.15023e+07	9.80118e+07	8.56033e+07	9.71286e+07	1.14781e+08	7.84682e+07	1.00962e+08	8.99834e+07	1.38698e+08	120528178	1.14163e+08	1.12414e+08	8.62624e+07	1.19808e+08	1.02542e+08	7.18662e+08	8.85406e+07	125685399	1.01439e+08	1.01822e+08	8.51949e+07	1.20803e+08	1.17861e+08	9.67553e+07	1.38342
Q8BMJ3	Eukaryotic translation initiation factor 1A, X-chromosomal OS=Mus musculus OX=10090 GN=Eif1ax PE=2 SV=3 - [IF1AX_MOUSE]	92.36	2	4	22	143	3.40094e+08	8.98525e+07	4.05326e+07	8.05921e+07	6.39087e+07	3.46501e+08	1.96417e+08	6.72369e+07	9.1213e+07	2.07563e+07	1.25392e+08	8.52554e+07	7.47914e+07	9.38341e+07	1.23396e+08	6.80544e+07	5.18128e+07	5.68217e+07	76707074	1.19852e+08	6.81059e+07	4.51638e+07	7.84607e+07	100429029	1.05853e+08	1.17923e+08	1.10847e+08	3.59508e+07	1.12248e+08	1.90055e+08	1.07893e+08	6.32887e+07	5.22625e+07	2.09294e+08	1.06365e+08	1.72245e+08	7.42368e+07	89593736	1.22996e+08	1.44425e+08	1.00534e+08	7.46496e+07	0.817374
P61264	Syntaxin-1B OS=Mus musculus OX=10090 GN=Stx1b PE=1 SV=1 - [STX1B_MOUSE]	92.36	3	14	46	871	7.87749e+08	6.1563e+08	800082268	6.97102e+08	4.67311e+08	8.3231e+08	8.79515e+08	1.01734e+09	4.8472e+08	2.43786e+08	5.67362e+08	9.511e+08	1.07822e+09	9.50089e+08	697283735	5.8558e+08	4.89733e+08	7.7442e+08	6.70688e+08	695245079	4.17907e+08	4.87201e+08	4.40843e+08	6.77191e+08	5.69117e+08	5.73531e+08	7.38144e+08	5.32601e+08	5.96239e+08	1.01576e+09	4.23127e+08	3.77684e+08	1.01604e+09	1184947054	6.84707e+08	1.70908e+09	1.50634e+09	8.79437e+08	6.73575e+08	6.91535e+08	8.48811e+08	6.43133e+08	1.26016
P46467	Vacuolar protein sorting-associated protein 4B OS=Mus musculus OX=10090 GN=Vps4b PE=1 SV=2 - [VPS4B_MOUSE]	92.34	2	2	40	147	1.42717e+08	3.41316e+07	2.45681e+07	1.13409e+07	2.49909e+07	4.2522e+07	3.2309e+07	1.67435e+07	3.45155e+07	6.10682e+07	44354173	2.8108e+07	6.49369e+07	3.583e+07	3.76642e+07	4.55786e+07	5.31146e+07	3.58692e+07	3.97497e+07	3.60942e+07	2.60819e+07	2.97323e+07	3.70682e+07	3.83482e+07	5.13172e+07	3.15179e+07	4.7095e+07	4.79586e+07	1.63825e+08	4.03767e+07	1.62158e+07	5.99414e+07	6.97694e+07	5.10848e+07	1.8773e+07	7.36751e+07	37846430	5.77835e+07	4.75496e+07	3.74317e+07	4.21787e+07	4.20813e+07	0.887046
Q6QWF9	Calcium/calmodulin-dependent protein kinase II inhibitor 1 OS=Mus musculus OX=10090 GN=Camk2n1 PE=1 SV=1 - [CK2N1_MOUSE]	92.31	2	2	8	59	7.03883e+07	6.5583e+07	5.36433e+07	9.55176e+07	4.8939e+07	0	66935574	87432918	131953618	3.42373e+07	55690536	130432614	7.72058e+07	67714365	7.68814e+07	76764897	7.15866e+07	64886010	17241117193	8.69477e+07	1.06079e+07	1.15036e+08	4.20062e+07	0	4.73986e+07	59856453	1.51678e+08	5.12789e+07	77914540	77637162	49960012	1.17821e+08	122434538	4.58123e+07	66950410	194383850	8.72829e+07	130330946	6.68142e+07	6.41119e+07	8.15849e+07	3.50826e+09	1.22107
Q80XU3	Nuclear ubiquitous casein and cyclin-dependent kinase substrate 1 OS=Mus musculus OX=10090 GN=Nucks1 PE=1 SV=1 - [NUCKS_MOUSE]	92.31	1	3	42	213	1.70328e+08	1.46029e+08	7.08784e+07	5.26984e+07	3.8699e+07	9.96713e+07	1.09317e+08	9.38029e+07	5.67155e+07	0	1.78273e+08	7.71521e+07	7.72635e+07	8.61597e+07	1.69464e+09	5.25531e+07	4.39413e+07	6.78589e+07	6.67037e+07	7.14234e+07	132532676	1.53546e+08	6.70368e+07	164016767	1.46138e+08	5.34184e+07	9.98323e+07	5.9141e+07	4.15644e+07	1.4468e+08	0	2.56265e+07	4.30355e+07	5.37623e+07	143906284	9.41e+07	110696849	6.98408e+07	9.57266e+07	7.19012e+07	4.22697e+08	6.04961e+07	4.41567
Q9D820	Prolyl-tRNA synthetase associated domain-containing protein 1 OS=Mus musculus OX=10090 GN=Prorsd1 PE=1 SV=1 - [PRXD1_MOUSE]	92.31	1	1	17	118	2.8931e+08	1.63755e+08	4.9563e+08	5.16275e+08	1.45378e+08	86574352	759159850	2.43662e+08	3.06207e+08	9.84314e+08	772189810	477805411	1.41225e+08	2.23911e+08	90562232	6.87598e+08	9.52905e+07	1.79705e+08	2.87119e+08	5.33965e+08	2.09414e+08	1.77249e+08	4.68335e+08	1.50311e+08	5.183e+07	6.13194e+08	2.19322e+08	1.22654e+08	5.30775e+08	9.08246e+08	1.82923e+09	8.85203e+07	3.14145e+09	3.26626e+09	706279059	3.45522e+08	1.06327e+09	4.86287e+08	3.22069e+08	4.75983e+08	3.41139e+08	3.56736e+08	1.05921
Q99JI4	26S proteasome non-ATPase regulatory subunit 6 OS=Mus musculus OX=10090 GN=Psmd6 PE=1 SV=1 - [PSMD6_MOUSE]	92.29	1	16	52	448	2.2243e+08	1.21825e+09	1.06562e+08	1.85259e+08	80659079	2.0325e+08	3.59879e+08	105222256	8.6897e+07	8.70533e+07	1.93359e+08	2.19261e+08	8.48849e+07	2.29887e+08	1.90156e+08	3.20782e+08	2.44657e+08	8.55238e+07	1.08308e+08	2.42211e+08	7.8799e+07	2.09272e+08	8.32496e+07	9.02311e+07	1.41566e+08	1.48375e+08	1.30486e+08	106883381	1.26082e+08	1.0355e+09	7.34552e+07	9.19944e+07	5.51792e+08	7.61067e+08	2.53829e+08	5.48999e+08	1.05157e+08	1.93013e+08	3.62633e+08	1.6846e+08	1.8351e+08	2.00296e+08	0.506048
Q80UG5	Septin-9 OS=Mus musculus OX=10090 GN=Septin9 PE=1 SV=1 - [SEPT9_MOUSE]	92.28	1	22	88	791	3.12214e+08	1.4303e+08	1.57337e+08	8.91496e+08	1.22703e+08	5.95764e+08	2.23724e+08	2.05692e+08	173206005	1.2476e+08	1.91915e+09	1.63511e+09	1.64954e+08	1.22086e+09	3.75955e+09	5.29669e+08	1.24334e+09	4.68882e+08	1.82299e+08	2.49887e+08	1.68188e+08	9.84768e+08	1.68209e+08	1109934271	1.72914e+08	161765421	1.47178e+09	1.68216e+08	6.91091e+08	1.00316e+09	1.60135e+08	6.62225e+08	2.48469e+08	2.57362e+08	2.16412e+08	9.32713e+08	7.66886e+08	2.46148e+08	3.25356e+08	2.64629e+08	1.73992e+09	5.34815e+08	5.34776
Q9CQE5	Regulator of G-protein signaling 10 OS=Mus musculus OX=10090 GN=Rgs10 PE=1 SV=1 - [RGS10_MOUSE]	92.27	1	4	25	378	1.86138e+09	1.12913e+07	6.99142e+06	1.67326e+07	5.42236e+06	2.13931e+09	1.92596e+07	1.21468e+09	1.37881e+07	2.79128e+07	2019253105	1.96961e+07	1.2606e+09	20644758	1.79941e+07	2.22873e+09	1.63228e+09	9.10553e+06	2.27563e+09	1733914883	1.88111e+09	1.2306e+07	8.43765e+06	1.74337e+09	1.83042e+09	4.20154e+07	3.78714e+07	1.28289e+07	7.62829e+07	1.82746e+09	1.75689e+09	1.53178e+07	9.16408e+06	2.81069e+09	1.92069e+09	2.07029e+09	1.16387e+07	1.16017e+07	3.80364e+08	6.8299e+08	6.67638e+08	1.57593e+09	1.75526
P59999	Actin-related protein 2/3 complex subunit 4 OS=Mus musculus OX=10090 GN=Arpc4 PE=1 SV=3 - [ARPC4_MOUSE]	92.26	1	9	28	300	1.10431e+09	654002118	5.62467e+08	7.31091e+08	4.96028e+08	1.04332e+09	1.00593e+09	7.46302e+08	6.84527e+08	4.13773e+08	7.89092e+08	1.10115e+09	6.19297e+08	8.92642e+08	6.92613e+08	7.2962e+08	6.29322e+08	6.38324e+08	784984354	9.03688e+08	6.58635e+08	6.78519e+08	5.84309e+08	7.40801e+08	6.87779e+08	7.64242e+08	1.02539e+09	7.43027e+08	8.28174e+08	8.17098e+08	6.19128e+08	7.1337e+08	8.27643e+08	1.0068e+09	8.4809e+08	1.22957e+09	8.72855e+08	9.15325e+08	7.0958e+08	7.78771e+08	8.18959e+08	7.37188e+08	1.15415
Q8R570	Synaptosomal-associated protein 47 OS=Mus musculus OX=10090 GN=Snap47 PE=1 SV=1 - [SNP47_MOUSE]	92.25	1	24	56	501	3.92065e+08	2.74867e+08	2.214e+08	1.96025e+08	1.13072e+08	8.00195e+08	3.81682e+08	6.31252e+08	2.84873e+08	7.51741e+07	2.62817e+08	3.76847e+08	265331367	2.13528e+08	1.70093e+08	2.91869e+08	2.3957e+08	2.17634e+08	1.78939e+08	1.27614e+09	2.21003e+08	2.32817e+08	2.21804e+08	1.2129e+09	2.68336e+08	3.32808e+08	2.58032e+08	1.63055e+08	1.56159e+08	3.13733e+08	1.989e+08	2.71844e+08	2.14161e+08	427521770	3.00879e+08	2.84045e+08	1.36486e+08	167089327	2.39486e+08	4.34635e+08	2.57723e+08	4.4083e+08	1.07615
Q9CQQ8	U6 snRNA-associated Sm-like protein LSm7 OS=Mus musculus OX=10090 GN=Lsm7 PE=1 SV=1 - [LSM7_MOUSE]	92.23	1	2	13	59	7.14475e+07	0	3.54108e+07	4.17889e+07	57160093	7.04774e+07	216898052	1.41784e+07	7.60462e+07	9.1605e+07	0	0	1.68441e+08	0	1.38526e+08	3.80168e+07	4.6899e+07	1.24063e+08	2.63603e+07	7.35842e+07	8.22093e+06	0	71215032	3.82816e+07	2.1762e+08	135370509	0	1.6e+08	1.29605e+08	66261290	0	5.75771e+07	0	0	1.09553e+08	189497346	3.3319e+07	5.63739e+07	4.11615e+07	9.3841e+07	6.13933e+07	6.17846e+07	1.49152
P63024	Vesicle-associated membrane protein 3 OS=Mus musculus OX=10090 GN=Vamp3 PE=1 SV=1 - [VAMP3_MOUSE]	92.23	1	1	14	211	1.68761e+09	1.08903e+09	1.02546e+09	933253881	5.63288e+08	1.45752e+09	1.56206e+09	1.535e+09	8.23612e+08	3.21943e+08	1.39769e+09	1857938598	1293415779	1375590141	1.00718e+09	1.03055e+09	1.10041e+09	5.48708e+08	8.57571e+08	7.89743e+08	8.14256e+08	9.65387e+08	5.04821e+08	5.99925e+08	1.07833e+09	1.35876e+09	1.64606e+09	1.10243e+09	1.49511e+09	1.26433e+09	9.67868e+08	4.81957e+08	6.5864e+08	1967346603	1.20008e+09	2.82732e+09	1.56911e+09	1710764173	1.05973e+09	1.14003e+09	1.38636e+09	8.65396e+08	1.30823
Q8CHP8	Glycerol-3-phosphate phosphatase OS=Mus musculus OX=10090 GN=Pgp PE=1 SV=1 - [PGP_MOUSE]	92.21	1	17	32	566	5.706e+08	2.76336e+08	5.89036e+08	2.90791e+08	5.52501e+08	5.07851e+08	4.58263e+08	5.38833e+08	3.59841e+08	4.71516e+08	4.5965e+08	3.80188e+08	3.41025e+08	4.1457e+08	2.41174e+08	2.47287e+08	3.12042e+08	536247554	3.65949e+08	8.15563e+08	2.8953e+08	2.28122e+08	3.09871e+08	6.41907e+08	6.64347e+08	3.31588e+08	4.88357e+08	3.58323e+08	4.93312e+08	240682181	2.8848e+08	3.4079e+08	4.20822e+08	3.45101e+08	2.59919e+08	4.54335e+08	8.38606e+08	6.6754e+08	4.55853e+08	4.67261e+08	3.67321e+08	4.55418e+08	0.80579
Q8BUV3	Gephyrin OS=Mus musculus OX=10090 GN=Gphn PE=1 SV=2 - [GEPH_MOUSE]	92.2	1	24	86	732	2.6908e+08	1.68023e+08	1.66424e+08	1.81305e+08	1.30438e+08	3.50949e+08	2.54576e+08	205210370	1.99352e+08	1.21927e+08	3.3328e+08	2.87646e+08	1.41711e+08	2.13353e+08	1.954e+08	2.49919e+08	1.86867e+08	1.46316e+08	3.21172e+08	2.9509e+08	1.55108e+08	1.75233e+08	1.63612e+08	1.83807e+08	2.21555e+08	2.15562e+08	2.63969e+08	2.06915e+08	1.95342e+08	2.17415e+08	1.67654e+08	1.95082e+08	2.55281e+08	2.41294e+08	2.00458e+08	3.65166e+08	2.38362e+08	1.93532e+08	1.83054e+08	2.26403e+08	2.34278e+08	2.39873e+08	1.27983
P10649	Glutathione S-transferase Mu 1 OS=Mus musculus OX=10090 GN=Gstm1 PE=1 SV=2 - [GSTM1_MOUSE]	92.2	3	16	40	919	7199846232	1.15027e+09	1.11678e+09	1.45946e+09	1.01562e+09	7236683889	6.27502e+09	4530625272	1.3394e+09	2.25442e+09	1.6134e+09	1.96791e+09	1.09433e+09	4.5093e+09	1.46487e+09	1.41644e+09	1.29494e+09	1293955494	4.07664e+09	5156029153	4.4041e+09	3.51517e+09	4.02576e+09	1.17752e+09	5.35248e+09	1.75915e+09	2.0015e+09	1.39154e+09	6.13307e+09	4.85702e+09	1116353241	4.78748e+09	4.93117e+09	2.15262e+09	5.88055e+09	2.74373e+09	4.20177e+09	1.73532e+09	2.38839e+09	4.32723e+09	2.12996e+09	2.6476e+09	0.891796
P70380	Interleukin-18 OS=Mus musculus OX=10090 GN=Il18 PE=1 SV=2 - [IL18_MOUSE]	92.19	1	1	16	49	4.95104e+07	1.77576e+07	1.95714e+07	0	3.673e+07	44802569	0	3.08681e+07	2.4971e+07	1.58941e+07	2.05462e+07	4.09109e+07	2.74924e+07	0	0	25935717	3.66684e+07	0	0	0	5.59956e+07	5.12406e+07	0	2.41325e+07	2.36692e+07	0	30425295	0	0	0	2.19221e+07	0	312980017	2.42052e+07	3.08419e+07	9.33122e+07	1.96839e+07	2.63467e+07	2.47139e+07	2.33072e+07	1.77899e+07	1.25208e+07	0.719834
Q9R1T4	Septin-6 OS=Mus musculus OX=10090 GN=Septin6 PE=1 SV=4 - [SEPT6_MOUSE]	92.17	1	16	54	1035	1.91062e+09	1.13913e+09	1.14032e+09	1.4885e+09	1.09341e+09	1.74646e+09	1.64995e+09	1.50883e+09	1.49832e+09	8.78541e+08	1.42571e+09	1.8208e+09	1.47167e+09	1.86853e+09	1.81564e+09	1.29152e+09	1.33949e+09	1.28609e+09	1.6553e+09	1.99448e+09	1312253461	1.5114e+09	1.08424e+09	1.48583e+09	1442622271	1.33651e+09	2.15339e+09	1.53499e+09	1.63446e+09	1.35858e+09	1.3653e+09	1608715252	1.93344e+09	1.82188e+09	1.33398e+09	2.31937e+09	1899072703	1.90109e+09	1.35439e+09	1.45642e+09	1.68047e+09	1.51338e+09	1.24075
P22005	Proenkephalin-A OS=Mus musculus OX=10090 GN=Penk PE=1 SV=2 - [PENK_MOUSE]	92.16	1	2	39	71	2.1482e+08	1.57231e+07	71523524	0	3.48242e+07	4.70259e+07	9.04556e+07	4.39569e+07	1.2664e+09	0	1.22693e+07	195751336	1.19661e+08	1.26461e+09	20138109	0	39077944	0	8.69156e+07	6.84421e+08	43028833	4.33782e+07	2.19106e+08	3.32653e+07	37900423	4.85376e+07	3.40757e+07	5.97695e+08	141357660	1.32845e+08	2.12152e+07	0	21788035	7.9839e+07	5.97701e+07	1.90257e+08	79794990	8.02586e+07	6.73781e+07	2.89568e+08	3.22486e+08	1.62083e+08	4.78622
Q9D706	RNA polymerase II-associated protein 3 OS=Mus musculus OX=10090 GN=Rpap3 PE=1 SV=1 - [RPAP3_MOUSE]	92.12	1	4	85	201	2.1286e+08	2.23723e+07	8.80439e+07	7.05973e+07	1.24619e+08	1.38908e+09	1.31687e+08	8.25867e+07	8.45097e+07	7.3083e+07	1.90398e+08	2.05964e+08	3.5699e+08	2.58175e+08	7.44985e+07	1.2336e+08	3.33643e+07	1.09431e+07	5.31662e+06	3.44614e+07	3.29803e+08	2.16679e+08	1.98561e+09	2.47369e+07	1.21217e+08	1.19629e+08	1.15784e+07	2.64918e+08	1.6531e+08	2.02123e+08	5.99212e+07	1.72915e+08	1.58135e+08	1.73809e+08	85131259	4.71686e+08	8.04313e+07	6.4098e+07	1.03699e+08	3.5219e+08	2.17205e+08	4.14892e+07	2.09458
Q63844	Mitogen-activated protein kinase 3 OS=Mus musculus OX=10090 GN=Mapk3 PE=1 SV=5 - [MK03_MOUSE]	92.11	11	12	47	534	4.11644e+08	2.93255e+08	255140690	2.66993e+08	1.79413e+08	4.5295e+08	3.98e+08	297779393	2.85633e+08	1.68777e+08	3.84931e+08	4.62692e+08	2.53205e+08	2.72602e+08	2.06407e+08	2.71893e+08	2.7838e+08	2.75557e+08	3.18273e+08	425160550	2.76011e+08	2.3937e+08	2.52574e+08	279524191	3.22153e+08	8.39888e+08	401982311	2.23347e+08	2.8835e+08	3.5585e+08	2.44355e+08	2.43457e+08	1.85993e+08	4.46926e+08	3.34486e+08	5.33584e+08	2.77786e+08	352339650	2.81289e+08	3.20628e+08	3.15967e+08	3.13853e+08	1.12328
P12970	60S ribosomal protein L7a OS=Mus musculus OX=10090 GN=Rpl7a PE=1 SV=2 - [RL7A_MOUSE]	92.11	2	10	53	496	3.35073e+08	8.82767e+09	6.63277e+09	8.22124e+09	6.24895e+09	2.5281e+08	1.05152e+10	1.27522e+08	1.83112e+08	5.29547e+09	9.17788e+09	1.20771e+10	7.66486e+09	9.26375e+09	6.16406e+09	7.94661e+09	7.00251e+09	6.98932e+09	1.03746e+10	1.12229e+10	8.54784e+09	9.14454e+09	6882407532	7.92712e+09	8.66443e+09	1.57884e+08	1.17443e+10	8.51331e+09	1.00189e+10	1.10598e+10	1.44995e+08	7.26585e+09	9571550289	1.18328e+10	7.58427e+09	1.28825e+10	8.15563e+09	1.01646e+10	6.05314e+09	3.27483e+09	8.86954e+09	8.7072e+09	1.46528
Q9WTP7	GTP:AMP phosphotransferase AK3, mitochondrial OS=Mus musculus OX=10090 GN=Ak3 PE=1 SV=3 - [KAD3_MOUSE]	92.07	1	15	29	312	1.83586e+09	1.01242e+08	1.02468e+08	141130008	6.07731e+08	6.55055e+08	1.62757e+08	1.4576e+08	1.41886e+08	6.37456e+08	1.12762e+09	9.16603e+08	7.41695e+08	1.24095e+09	1.10882e+08	1.12515e+08	7.82945e+07	814921156	1.43995e+08	1.71467e+08	8.47853e+07	6.48012e+08	8.02442e+08	1.47314e+08	1.04294e+09	9.81091e+07	1.60441e+08	9.55414e+08	1.27016e+08	1.19675e+08	1.12639e+08	2.3545e+08	9.92423e+08	1.59365e+08	1.30334e+08	1.94988e+08	2.03097e+08	1.33263e+08	5.57687e+08	348583010	8.2755e+08	2.64239e+08	1.4839
Q6ZWV3	60S ribosomal protein L10 OS=Mus musculus OX=10090 GN=Rpl10 PE=1 SV=3 - [RL10_MOUSE]	92.06	2	7	33	260	5.82577e+08	2.09095e+08	2.22833e+08	1.52398e+08	1.13371e+08	2.51752e+08	2.55099e+08	1.25771e+08	2.27411e+08	2.5331e+08	1.98163e+08	443542683	4.46955e+08	2.05351e+08	2.67058e+08	142926484	3.06478e+08	2.59202e+08	3.23814e+08	1.99286e+08	1.25294e+08	7.34128e+08	2.37683e+08	3.31144e+08	2.65411e+08	1.43355e+08	4.10683e+08	7.13881e+08	3.34855e+08	236650673	2.92163e+08	442613843	1.42309e+08	163943300	1.49305e+08	564629780	1.59663e+08	2.37417e+08	2.56055e+08	2.22668e+08	3.12214e+08	2.46341e+08	1.21932
P56812	Programmed cell death protein 5 OS=Mus musculus OX=10090 GN=Pdcd5 PE=1 SV=3 - [PDCD5_MOUSE]	92.06	1	5	21	170	2.1777e+08	5.85221e+07	1.6112e+08	1.48383e+08	90651379	2.0743e+08	2.85263e+08	289597487	1.3123e+08	7.17293e+07	1.62798e+08	180901574	8.53486e+07	1.66128e+08	1.28042e+08	2.37691e+08	1.49678e+08	1.46487e+08	1.67871e+08	2.54325e+08	1.24538e+08	1.3793e+08	2.0135e+08	1.06957e+08	171720699	2.84167e+08	1.40624e+08	1.33658e+08	1.18615e+08	1.56315e+08	1.21837e+08	1.67794e+08	2.67583e+08	3.691e+08	1.54725e+08	1.84587e+08	8.34058e+07	2.22998e+08	1.35289e+08	1.9705e+08	1.44644e+08	1.9121e+08	1.06914
Q62448	Eukaryotic translation initiation factor 4 gamma 2 OS=Mus musculus OX=10090 GN=Eif4g2 PE=1 SV=2 - [IF4G2_MOUSE]	92.05	1	9	110	537	9.68854e+07	5.85419e+08	4.84578e+08	7.28142e+08	3.73461e+08	7.68407e+08	7.79562e+08	6.58939e+08	1.33918e+08	8.72486e+07	6.43811e+08	1.02655e+09	5.8724e+08	9.88091e+08	5.13466e+07	4.13183e+08	7.08586e+08	5.64717e+08	6.8229e+08	6.94063e+08	9.7733e+07	4.63198e+08	4.42083e+08	6.4709e+08	1.20386e+08	9.64673e+07	8.46741e+07	5.27498e+08	836653987	6.30398e+08	5.10244e+08	5.90007e+08	2.08592e+08	797418923	4.70752e+08	1215657620	1.24225e+08	1.49022e+08	4.53697e+08	4.85615e+08	6.59408e+08	6.12568e+08	1.45341
P62900	60S ribosomal protein L31 OS=Mus musculus OX=10090 GN=Rpl31 PE=1 SV=1 - [RL31_MOUSE]	92	1	7	21	189	8.02513e+08	6.72251e+08	1.06893e+08	6.00957e+08	3.80815e+08	9.86943e+07	1874487048	4.05757e+09	1.0179e+08	6.08778e+07	2.70567e+08	5.9274e+08	8.26838e+07	7.43565e+08	5.55663e+08	4.66156e+07	9.68232e+08	5.20136e+08	6.67508e+08	7.20542e+08	2.51582e+08	8.75108e+08	2.42928e+08	1.38361e+09	8.33562e+08	427857859	1.28725e+08	5.44567e+08	718087575	7.41376e+08	6.15665e+08	5.61677e+08	6.65291e+08	1.1917e+09	1.12325e+08	1.24712e+09	8.0172e+08	7.99525e+08	5.12686e+08	1.23868e+09	4.49044e+08	5.84607e+08	0.875865
P63017	Heat shock cognate 71 kDa protein OS=Mus musculus OX=10090 GN=Hspa8 PE=1 SV=1 - [HSP7C_MOUSE]	91.95	1	31	83	3612	8.99039e+09	6.90271e+09	5.6598e+09	6.90911e+09	4.86765e+09	8.61703e+09	8.09793e+09	7.88518e+09	6.60519e+09	4.73076e+09	7.54146e+09	1.07356e+10	6.36686e+09	8.2051e+09	6.74462e+09	6.50759e+09	6.88804e+09	5.92202e+09	7.62668e+09	8.45593e+09	5607379498	6.64857e+09	5.82974e+09	8.36707e+09	7.18345e+09	8073736143	1.0368e+10	7.15232e+09	8.66099e+09	7.63803e+09	5.85368e+09	7.28791e+09	8322727774	10699425404	7.49185e+09	1.31119e+10	8.60323e+09	9466829090	6.66593e+09	7.18722e+09	7.91872e+09	7.08005e+09	1.18794
Q8CAA7	Glucose 1,6-bisphosphate synthase OS=Mus musculus OX=10090 GN=Pgm2l1 PE=1 SV=1 - [PGM2L_MOUSE]	91.95	1	29	76	1048	6.13692e+08	3.92923e+08	3.14399e+08	4.20342e+08	3.01524e+08	578764692	5.85366e+08	4.41544e+08	4.83085e+08	2.30528e+08	4.73705e+08	6.8151e+08	4.06463e+08	5.79074e+08	437675129	3.8722e+08	4.38887e+08	3.33474e+08	4.87599e+08	5.53048e+08	4.16648e+08	4.64042e+08	3.12361e+08	5.24281e+08	4.56591e+08	4.88839e+08	6.80254e+08	500006798	5.04601e+08	4.11334e+08	5.13905e+08	3.98083e+08	5.26264e+08	5.39456e+08	4.52133e+08	8.02771e+08	4.94697e+08	6.31218e+08	4.08576e+08	4.63857e+08	5.15685e+08	4.40046e+08	1.26215
Q9Z0Y1	Dynactin subunit 3 OS=Mus musculus OX=10090 GN=Dctn3 PE=1 SV=2 - [DCTN3_MOUSE]	91.94	1	10	21	283	2.3166e+08	9.16518e+07	1.07419e+08	1.25516e+08	8.55573e+07	1.9234e+08	1.9123e+08	1.30945e+08	1.23813e+08	1.13646e+08	1.90839e+08	1.81106e+08	1.21693e+08	1.47701e+08	8.86846e+07	1.50079e+08	1.17767e+08	123507288	1.38872e+08	2.03999e+08	1.22968e+08	1.1044e+08	1.19426e+08	1.17344e+08	1.90186e+08	1.20343e+08	170302497	1.39593e+08	1.81172e+08	1.56847e+08	1.19523e+08	1.43631e+08	1.82714e+08	1.84654e+08	1.6771e+08	2.03814e+08	1.60764e+08	1.47789e+08	1.28361e+08	1.50395e+08	1.46005e+08	1.46845e+08	1.13745
Q61035	Histidine--tRNA ligase, cytoplasmic OS=Mus musculus OX=10090 GN=Hars1 PE=1 SV=2 - [HARS1_MOUSE]	91.94	2	20	59	526	2.09345e+08	1.35141e+08	1.40515e+08	2.28601e+08	1.28399e+08	2.09727e+08	2.19299e+08	2.10695e+08	2.21566e+08	1.43569e+08	2.37213e+08	3.40542e+08	2.45493e+08	2.77026e+08	198839224	3.5862e+08	3.16582e+08	1.58094e+08	2.03465e+08	2.35668e+08	3.48846e+08	1.48926e+08	1.65601e+08	1.7043e+08	1.97686e+08	1.89626e+08	246674832	1.95483e+08	2.26713e+08	1.82368e+08	1.49858e+08	2.40569e+08	2.05563e+08	2.6475e+08	1.69685e+08	370104684	2.02262e+08	3.46892e+08	1.684e+08	2.00971e+08	2.59823e+08	2.54486e+08	1.54289
Q9CQJ6	Density-regulated protein OS=Mus musculus OX=10090 GN=Denr PE=1 SV=1 - [DENR_MOUSE]	91.92	1	5	25	212	1.941e+08	1.33933e+08	1.06065e+08	3.00488e+08	9.10996e+07	2.11518e+08	2.01741e+08	1.38239e+08	1.57038e+08	8.2772e+07	1.3038e+08	2.43615e+08	138150399	1.88117e+08	1.47168e+08	9.58517e+07	2.74969e+08	2.73492e+08	1.63888e+08	2.11809e+08	1.16458e+08	1.45373e+08	1.09934e+08	4.51725e+08	4.86064e+08	3.56554e+08	1.82336e+08	3.27255e+08	1.86577e+08	173336462	1.38783e+08	1.57861e+08	1.85858e+08	263118563	1.99409e+08	2.92555e+08	1.67669e+08	1.99603e+08	1.65137e+08	1.58262e+08	1.69486e+08	2.04002e+08	1.02633
Q9DCB1	High mobility group nucleosome-binding domain-containing protein 3 OS=Mus musculus OX=10090 GN=Hmgn3 PE=1 SV=1 - [HMGN3_MOUSE]	91.92	1	1	14	48	2.89802e+09	0	3.5368e+07	6.06164e+07	1.97548e+07	0	6.36304e+06	4.74035e+07	5.0632e+07	32192276	46323314	0	5.09946e+07	4.1009e+07	4.16553e+07	6.43363e+06	0	1.90278e+07	1.75775e+06	2.66951e+07	1.64675e+07	3.14254e+07	1.22644e+08	0	4.63779e+07	7.1838e+06	1.13231e+08	2.27224e+07	0	2.88698e+07	4.08996e+07	4.74864e+07	2.75579e+07	7941351	6.88501e+07	6.29294e+07	7.75842e+06	0	6.02752e+08	2.73182e+07	3.59964e+07	10782865	0.0597202
Q5RJI5	Serine/threonine-protein kinase BRSK1 OS=Mus musculus OX=10090 GN=Brsk1 PE=1 SV=1 - [BRSK1_MOUSE]	91.9	1	6	96	476	2.31112e+09	2.16202e+09	1.02658e+09	9.34871e+08	3.30052e+08	1.03823e+09	1.61238e+09	9.99333e+08	7.2441e+08	2.89517e+08	1.6488e+09	2.23575e+09	5.58932e+08	1.30678e+09	9.09935e+08	6.20862e+07	8.85674e+08	1048699726	1700036054	8.80372e+08	5.37004e+08	9.88824e+08	1.04969e+09	7.49789e+08	1.86127e+09	1.82331e+09	2.75081e+09	1840712210	8.49714e+08	1.67502e+09	7.06008e+08	8.60477e+08	1.20466e+09	6.81636e+08	1.08425e+09	2.92676e+09	1.41769e+09	1.03828e+09	1352928474	9.32775e+08	1.33204e+09	9.15374e+08	0.984559
Q8BH58	TIP41-like protein OS=Mus musculus OX=10090 GN=Tiprl PE=1 SV=1 - [TIPRL_MOUSE]	91.88	1	12	27	357	1.69873e+09	9.12132e+08	2.24871e+09	1.34558e+08	8.96498e+07	3.35217e+08	2.57339e+09	1.37122e+09	1.42965e+08	9.22883e+07	141852072	1.5566e+08	2.70376e+09	4078278542	146041836	1.67187e+09	1.27485e+09	1.65822e+09	1.563e+08	251203113	2.53216e+09	3.10769e+09	1.59749e+08	1.43067e+09	2.2294e+09	2.0696e+08	1.67875e+08	2.54954e+09	2.48693e+08	2.09797e+09	1.19217e+08	1.53312e+08	1.9929e+08	1.82179e+08	1.08858e+09	2.93442e+08	3.95855e+09	2.60575e+09	1.01676e+09	9.03015e+08	1.44512e+09	1.00249e+09	1.4213
Q3UJP5	Cilia- and flagella-associated protein 418 OS=Mus musculus OX=10090 GN=Cfap418 PE=1 SV=1 - [CF418_MOUSE]	91.87	1	4	26	80	51035857	0	5.30641e+07	7.27756e+07	4.03325e+07	5.77393e+07	2.70199e+08	8.36239e+07	1.36691e+08	4.37047e+07	6.66638e+07	47117583	6.28359e+07	69648569	6.46824e+07	75241240	9.5635e+06	5.30006e+07	62443150	7.24373e+07	114679795	0	2.73932e+07	5.72503e+07	7.15225e+07	0	68400221	89612781	1.02381e+08	7.6962e+07	460528879	6.59382e+07	293000565	0	3.84498e+08	9.58299e+07	7.0094e+07	7.52329e+07	4.34416e+07	1.18392e+08	6.21897e+07	5.45372e+07	1.43157
Q61233	Plastin-2 OS=Mus musculus OX=10090 GN=Lcp1 PE=1 SV=4 - [PLSL_MOUSE]	91.87	1	11	79	443	2.41737e+09	4.74437e+08	1359181962	1.80334e+08	1.24837e+08	2.80767e+09	2.61933e+08	2.18053e+08	3.11716e+08	1.00854e+08	5.1217e+08	3.05134e+09	1.60309e+09	2.35675e+08	2.01705e+09	1876530229	2.0514e+09	1.65491e+09	1.95964e+08	2.3701e+09	1.70961e+09	1.89872e+09	1.30613e+08	1.62611e+08	1.88598e+08	1.43537e+08	2.88395e+08	1.84032e+08	657305664	2.20897e+09	1.46278e+09	1.15429e+08	2.69376e+08	2806182552	1925124660	3.52561e+08	2.29632e+08	4.03122e+08	9.11233e+08	7.40045e+08	1.48386e+09	1.62978e+09	1.62841
Q9R1K9	Centrin-2 OS=Mus musculus OX=10090 GN=Cetn2 PE=1 SV=1 - [CETN2_MOUSE]	91.86	1	5	27	292	1.82012e+08	36658535	1.24032e+08	5.14762e+07	1.69147e+08	5.57472e+07	5.49104e+07	1.36424e+07	2.63999e+08	3.42175e+07	1.71697e+08	1.95918e+08	1.22169e+08	8.28532e+07	2.25075e+07	3.83759e+07	3.41195e+08	2.58275e+07	3.86807e+07	6.21615e+07	8.5291e+07	8.99233e+07	1.61854e+08	2.57081e+08	3.8075e+07	1.67585e+08	55575105	1.29043e+08	4.9942e+08	4.43402e+07	2.03455e+08	4.50813e+07	4.67601e+07	2.44996e+08	3.84655e+08	1.21796e+08	4.97508e+07	2.91637e+08	1.12665e+08	8.45032e+07	1.19029e+08	1.01248e+08	1.05648
Q9CQB5	CDGSH iron-sulfur domain-containing protein 2 OS=Mus musculus OX=10090 GN=Cisd2 PE=1 SV=1 - [CISD2_MOUSE]	91.85	1	1	12	27	0	0	0	0	6.59498e+07	0	8.55344e+07	3.61477e+07	3.06506e+07	6.73628e+07	0	0	66137294	7.40146e+06	8.75229e+08	0	0	0	8.16327e+07	4.21252e+07	21941485	0	73821798	9.41739e+07	0	0	1.2018e+08	7.09494e+07	121063869	61079423	32311986	2.32609e+08	2.18276e+08	0	1.02887e+07	139160697	1.87407e+08	1.18189e+08	1.319e+07	43939100	1.89754e+08	2.47516e+07	14.3862
Q3UHD6	Sorting nexin-27 OS=Mus musculus OX=10090 GN=Snx27 PE=1 SV=2 - [SNX27_MOUSE]	91.84	2	11	42	242	5.45054e+07	2.3281e+08	9.9062e+07	5.50574e+08	6.33477e+07	4.36328e+07	6.36625e+08	4.7329e+07	3.20982e+07	4673254	7.38675e+08	4.43105e+08	3.5351e+07	3.20518e+07	1.51905e+07	4.94349e+07	9.6125e+07	5.84454e+07	9.43754e+08	6.84616e+08	3.31626e+07	1.19858e+07	4.87995e+08	3.90547e+07	1.46879e+08	3.5877e+08	132476113	3.31027e+07	883241534	3.96998e+07	1.22361e+08	2.30613e+07	7.19969e+08	119450382	1.46954e+08	5.95637e+08	7.60251e+07	4.66458e+08	2.0006e+08	1.52872e+08	2.52875e+08	3.66475e+08	1.264
P61226	Ras-related protein Rap-2b OS=Mus musculus OX=10090 GN=Rap2b PE=1 SV=1 - [RAP2B_MOUSE]	91.8	1	1	19	88	49209368	6.77786e+07	5.21387e+07	7.48466e+07	0	50368536	7.09555e+07	5.75171e+07	3.52259e+07	3.63025e+07	2.91357e+07	6.00726e+07	8.90924e+07	1.17169e+08	4.25252e+07	5.83297e+07	4.15532e+07	6.8528e+07	4.66074e+07	75699809	26890757	22870680	4.05031e+07	7.94578e+07	1.17722e+08	4.23915e+07	0	0	3.66538e+07	5.82761e+07	2.62867e+07	2.66829e+07	1.46758e+08	1.14547e+08	9.16097e+07	1.77752e+08	5.43569e+07	81129329	4.87947e+07	5.00739e+07	6.75991e+07	5.81436e+07	1.38538
P28352	DNA-(apurinic or apyrimidinic site) endonuclease OS=Mus musculus OX=10090 GN=Apex1 PE=1 SV=2 - [APEX1_MOUSE]	91.8	1	10	41	260	1.06044e+08	7.1479e+07	6.09914e+07	9.93575e+07	4.29217e+07	1.81637e+08	5.18236e+07	7.36657e+07	6.50493e+07	4.69054e+07	6.09549e+07	118539149	4.30245e+07	1.05475e+08	8.60621e+07	1.39232e+08	8.14289e+07	4.53394e+07	9.04561e+07	1.34753e+08	103819281	4.72091e+07	8.43716e+07	5.09035e+07	66148821	1.19227e+08	8.90695e+07	1.0699e+08	5.48466e+07	5.15364e+07	5.30675e+07	1.07255e+08	8.54194e+07	1.19039e+08	1.52712e+08	1.87649e+08	1.02304e+08	70082272	7.61586e+07	8.38162e+07	8.28111e+07	9.82418e+07	1.08735
Q9CWM4	Prefoldin subunit 1 OS=Mus musculus OX=10090 GN=Pfdn1 PE=1 SV=1 - [PFD1_MOUSE]	91.8	1	6	22	131	109328867	3.73036e+07	3.69786e+07	8.49835e+07	5.58141e+07	1.63565e+08	1.30721e+08	3.92603e+07	5.03674e+07	3.56336e+07	2.05897e+08	1.00579e+08	5.9405e+07	95876845	8.38173e+07	5.06622e+07	9.52072e+07	6.26494e+07	26753507	1.49968e+08	8.86084e+07	7.93238e+07	6.0537e+07	42276828	71559139	5.51384e+07	16275561	7.39613e+07	1.64585e+08	1.41668e+08	84747924	5.01308e+07	1.16576e+08	1.33554e+08	6.33079e+07	5.16954e+06	9.51064e+07	1.29056e+08	6.48817e+07	8.39095e+07	1.09115e+08	7.7048e+07	1.68175
Q8BZ98	Dynamin-3 OS=Mus musculus OX=10090 GN=Dnm3 PE=1 SV=1 - [DYN3_MOUSE]	91.77	1	27	118	2144	5.21267e+09	3.39217e+09	2.47872e+09	3.0939e+09	2.34042e+09	5.36466e+09	4.57284e+09	3.3871e+09	3117440882	2.23911e+09	4.21482e+09	4.91132e+09	2.88642e+09	3.74209e+09	3.14088e+09	3.70998e+09	3205911092	2.82014e+09	3.61824e+09	4.191e+09	3.36888e+09	3.21467e+09	2.60427e+09	3.74205e+09	3.88376e+09	3.89558e+09	4.78786e+09	3.5866e+09	3.59752e+09	3.86004e+09	2.98347e+09	3.6094e+09	4.19066e+09	5.03228e+09	3.87723e+09	5.69101e+09	3.86192e+09	4.3834e+09	3.30358e+09	3.73623e+09	3.77911e+09	3.50905e+09	1.14394
O35551	Rab GTPase-binding effector protein 1 OS=Mus musculus OX=10090 GN=Rabep1 PE=1 SV=2 - [RABE1_MOUSE]	91.76	1	29	114	608	1.93839e+08	2.05407e+08	190020476	2.45165e+08	5.85547e+08	260563798	2.98136e+08	1.75809e+08	2.70717e+09	2.63022e+08	1.6109e+08	3.90257e+08	3.28228e+08	12104892033	3.46168e+08	1.63473e+08	7.39638e+07	1.59212e+08	3.40059e+09	1.18992e+08	1.26941e+08	1.76966e+08	1.01881e+08	2.26631e+08	1.80314e+08	2.03219e+08	3.90666e+08	9.4037e+09	1.04913e+10	1.89687e+08	1.44107e+08	216947662	1.17176e+10	1.39778e+08	1.23974e+08	3.19914e+08	8.58318e+08	2.12396e+08	2.83996e+08	7.4094e+08	2.66613e+09	7.83247e+08	9.38791
Q9DC77	Small muscular protein OS=Mus musculus OX=10090 GN=Smpx PE=1 SV=2 - [SMPX_MOUSE]	91.76	1	1	11	100	6.25087e+06	4.46082e+07	3.33671e+07	0	1.56357e+07	3.49885e+07	9.28273e+07	5.07065e+06	2.95823e+07	1.77153e+07	5.46305e+07	4.25559e+07	7.3416e+07	5.63734e+07	0	2.62494e+07	4.08615e+06	7.20808e+07	2.42e+07	3.66347e+07	8.57171e+07	65069118	34254860	2.93327e+07	3.80524e+07	1.01563e+08	5.57843e+07	8.72532e+07	73647349	2.57551e+07	5.1124e+07	32153806	3.50052e+07	1.11588e+08	1.02157e+08	5.70292e+07	1.7218e+07	0	1.99724e+07	3.60368e+07	4.53951e+07	3.26502e+07	2.2729
Q7TNC9	Inositol polyphosphate-5-phosphatase A OS=Mus musculus OX=10090 GN=Inpp5a PE=1 SV=1 - [I5P1_MOUSE]	91.75	1	2	34	97	5.98943e+08	1.42002e+09	117472061	4.69133e+08	9.02447e+07	1.77986e+09	2.00691e+09	7.12881e+07	5.13594e+08	1.45275e+08	1.15575e+08	1.73564e+09	2.70659e+08	5.32268e+08	5.34235e+08	6.42252e+08	1.26976e+09	1009339315	1.2534e+08	882727526	1.57357e+08	6.203e+08	7.79226e+06	5.71326e+07	5.88452e+08	1.25049e+08	1.67208e+08	8.89494e+07	250649943	5.13875e+08	9.15808e+08	0	755826618	1.65388e+09	1.19044e+09	1.08844e+08	8.08239e+07	7.97575e+08	5.39162e+08	9.03386e+08	6.37676e+08	7.85884e+08	1.18272
Q8BSL7	ADP-ribosylation factor 2 OS=Mus musculus OX=10090 GN=Arf2 PE=1 SV=2 - [ARF2_MOUSE]	91.71	3	2	25	748	3.93808e+09	2.07425e+09	1888446199	2.28853e+09	1.68178e+09	3.70672e+09	3.50611e+09	2.00986e+09	7.05069e+09	1.26068e+09	2.79168e+09	3.3698e+09	2.25383e+09	3.26383e+09	2.27855e+09	2.35144e+09	2.03732e+09	1.9534e+09	2.86896e+09	3002524855	2.21444e+09	2.17148e+09	1.79964e+09	2.5775e+09	2.41657e+09	2760740614	3.74645e+09	2.67453e+09	8.21182e+09	2.77661e+09	1.90235e+09	1.84981e+09	2.34877e+09	2.49165e+09	2667158976	3.97932e+09	3120084348	7.73424e+09	2.37422e+09	3.50681e+09	2.79154e+09	2.44273e+09	1.17577
Q3TIR3	Synembryn-A OS=Mus musculus OX=10090 GN=Ric8a PE=1 SV=2 - [RIC8A_MOUSE]	91.7	1	7	50	183	94546524	5.20318e+07	9.5111e+07	7.64997e+07	1.79288e+07	2.17255e+08	9.41837e+07	5.47008e+07	1.28669e+08	45734506	1.04661e+08	1.54386e+08	7.82505e+07	191515516	9.47541e+08	6.44165e+07	7.36234e+07	6.95528e+07	1.22372e+08	0	2.51228e+07	8.36722e+07	2.60931e+07	7.93492e+07	3.47737e+07	4.66761e+07	1.11261e+08	1.04575e+08	3.71298e+07	1.21888e+08	9.44743e+07	1.01799e+07	1.20818e+08	1.65612e+08	8.15871e+07	3.70774e+07	7.18297e+07	2.94715e+07	6.72236e+07	1.08109e+08	2.95271e+08	6.59929e+07	4.39237
Q9QXS1	Plectin OS=Mus musculus OX=10090 GN=Plec PE=1 SV=3 - [PLEC_MOUSE]	91.69	4	121	654	3274	2172314139	1.0872e+09	1.87122e+09	1505831884	1.51029e+09	1.44892e+09	1.98279e+09	1038694269	1.36627e+09	1.02249e+09	1.67355e+09	1.34684e+09	1.9978e+09	9.77731e+08	3.36259e+09	1.28288e+10	1.62632e+09	2.12646e+09	4.11394e+09	4.78566e+09	1.94864e+09	2.20071e+09	2.5674e+09	2.21412e+09	1.34828e+09	2.50959e+09	2.53296e+09	1.18021e+09	2.56928e+09	1.58958e+09	1.93158e+09	1.68726e+09	1.17834e+09	1.7946e+09	1.55988e+09	3.11066e+09	2.49689e+09	5.06483e+09	1.62937e+09	1.37183e+09	1.8717e+09	5.09624e+09	1.14873
P97351	40S ribosomal protein S3a OS=Mus musculus OX=10090 GN=Rps3a PE=1 SV=3 - [RS3A_MOUSE]	91.67	1	17	49	582	4.20193e+08	1.97108e+08	2.09765e+08	1.90839e+08	1.49894e+08	2.65291e+08	3.84107e+08	1.68952e+08	2.21706e+08	1.54653e+08	3.12726e+08	6.17907e+08	1.94621e+08	3.48176e+08	2.56517e+08	2.15582e+08	1.94847e+08	2.31688e+08	3.41758e+08	3.80013e+08	2.02013e+08	1.83336e+08	2.07816e+08	1.74121e+08	2.42329e+08	2.57168e+08	3.26211e+08	3.19868e+08	2.94102e+08	3.0154e+08	2.39183e+08	2.05941e+08	2.75554e+08	3.67911e+08	3.36684e+08	2.55621e+08	293015290	2.41214e+08	2.3356e+08	2.38942e+08	3.45989e+08	2.72778e+08	1.48137
Q99LB6	Methionine adenosyltransferase 2 subunit beta OS=Mus musculus OX=10090 GN=Mat2b PE=1 SV=1 - [MAT2B_MOUSE]	91.62	1	12	25	291	140374349	1.05135e+08	1.01361e+08	3.57487e+08	9.89169e+07	3.54161e+08	1.80992e+08	1.13913e+08	1.41437e+08	2.19699e+08	1.58341e+08	153651120	1.25598e+08	1.82464e+08	160563967	3.0609e+08	1.03767e+08	3.15639e+08	1.43149e+08	475839825	3.33129e+08	3.56582e+08	3.13269e+08	138027431	1.47423e+08	1.35904e+08	3.16704e+08	1.83712e+08	2.14022e+08	1.46832e+08	1.28109e+08	3.76907e+08	1.68239e+08	1.77374e+08	1.2539e+08	2.10097e+08	1.41891e+08	1.54065e+08	1.60655e+08	2.02041e+08	1.56124e+08	2.68897e+08	0.971794
Q9D9V3	Ethylmalonyl-CoA decarboxylase OS=Mus musculus OX=10090 GN=Echdc1 PE=1 SV=2 - [ECHD1_MOUSE]	91.61	1	4	33	111	8.02281e+07	56091312	3.7647e+07	3.62552e+07	1.35354e+08	7.59989e+07	4.43764e+07	57236746	2.73168e+07	1.15605e+07	0	4.49248e+07	4.48533e+07	8.15129e+07	1.34012e+08	3.74616e+07	4.35291e+07	3.84179e+07	1.40259e+08	1.98305e+08	3.94729e+07	4.57959e+07	3.00285e+07	64618566	51950712	6.54135e+07	39996800	1.09796e+08	1.52872e+08	53901350	1.27124e+08	50635860	37654657	6.00876e+07	4.91504e+07	7.74305e+07	2.10061e+08	56643400	6.91152e+07	4.32979e+07	6.10605e+07	9.15946e+07	0.88346
Q9QUH0	Glutaredoxin-1 OS=Mus musculus OX=10090 GN=Glrx PE=1 SV=3 - [GLRX1_MOUSE]	91.59	1	4	13	110	3.47448e+08	9.89601e+07	2.53009e+08	1.67975e+08	1.22118e+08	2.14235e+08	216758468	1.14905e+08	1.94038e+08	225395808	1.59681e+08	2.1752e+08	182439811	4.96913e+08	2.07516e+08	162307284	1.126e+08	3.33823e+08	358413199	2.14186e+08	1.71507e+08	4.13497e+08	1.56296e+08	1.53706e+08	291007276	1.02781e+08	245524931	2.10609e+08	2.40456e+08	3.22528e+08	1.22056e+08	2.17615e+08	2.24875e+08	211154525	1.89161e+08	1.91316e+08	3.14318e+08	119195764	1.97902e+08	1.93067e+08	2.52814e+08	2.36266e+08	1.27747
Q922Y1	UBX domain-containing protein 1 OS=Mus musculus OX=10090 GN=Ubxn1 PE=1 SV=1 - [UBXN1_MOUSE]	91.58	1	8	28	203	1.01226e+08	3.56701e+07	1.19471e+08	1.7391e+08	1.28488e+08	1.24092e+08	1.27037e+08	5.22037e+07	1.57498e+08	9.64242e+07	6.24102e+07	115670751	1.08325e+08	80712283	1.76955e+08	9.2589e+07	8.39802e+07	1.68269e+08	140550353	1.27405e+08	3.52322e+08	1.00077e+08	7.16136e+07	1.07196e+08	1.44235e+08	1.07989e+08	204042004	2.40297e+08	1.65095e+08	1.8545e+08	4.28326e+07	2.25766e+08	2.06737e+08	8.41187e+07	8.53581e+07	255638804	191982222	8.52507e+07	1.11753e+08	1.11451e+08	1.08815e+08	1.22559e+08	0.973705
P97825	Jupiter microtubule associated homolog 1 OS=Mus musculus OX=10090 GN=Jpt1 PE=1 SV=3 - [JUPI1_MOUSE]	91.56	1	5	17	141	2.22419e+08	8.92776e+07	8.74488e+07	1.14821e+08	9.7176e+07	2.06947e+08	1.43221e+08	1.31451e+08	1.27947e+08	7.16341e+07	1.27676e+08	1.32641e+08	1.12798e+08	147294063	1.39515e+08	1.58439e+08	1.3228e+08	8.51081e+07	135759389	1.83453e+08	1.48484e+08	1.2247e+08	7.69588e+07	7.1173e+07	2.06516e+08	1.13893e+08	1.58054e+08	1.10287e+08	127501262	8.42597e+08	92689774	1.01104e+08	7.39114e+07	1.33298e+08	8.17889e+08	1.91338e+08	6.3143e+07	201439782	1.22228e+08	1.3624e+08	1.31985e+08	1.39008e+08	1.07982
Q6GSS7	Histone H2A type 2-A OS=Mus musculus OX=10090 GN=Hist2h2aa1 PE=1 SV=3 - [H2A2A_MOUSE]	91.54	2	2	21	315	8.75941e+09	5.60067e+09	7.05104e+09	5.10888e+09	3.1533e+09	8690715324	6979241919	4.44484e+09	3.98687e+09	4.21252e+09	5.88936e+09	8.45823e+09	3625935620	6.02789e+09	5.38304e+09	6371951419	4.89065e+09	6.39114e+09	6.03918e+09	6.61583e+09	4.9816e+09	3.97458e+09	6.57092e+09	3.61583e+09	4.6526e+09	6.72216e+09	5.12491e+09	4.40983e+09	6.29047e+09	6.30477e+09	3.54662e+09	4.075e+09	4.72037e+09	1.08882e+10	6.87198e+09	1.00167e+10	5.51305e+09	4.45501e+09	5.93466e+09	5.66284e+09	5.87689e+09	6.06175e+09	0.990266
P35486	Pyruvate dehydrogenase E1 component subunit alpha, somatic form, mitochondrial OS=Mus musculus OX=10090 GN=Pdha1 PE=1 SV=1 - [ODPA_MOUSE]	91.54	1	22	53	648	5.47062e+08	4.96341e+08	5.95749e+08	5.57699e+08	3.28214e+08	4.73471e+08	5.139e+08	5.3055e+08	554719264	2.73443e+08	4.53418e+08	472239811	5.17521e+08	240066240	1.81146e+08	3.22062e+08	2.7799e+08	4.4246e+08	2.52686e+08	5.63452e+08	3.77633e+08	1.67031e+08	4.38488e+08	5.45976e+08	2.60754e+08	3.28625e+08	7.20798e+08	5.09178e+08	7.22587e+08	2.98254e+08	4.16768e+08	2.11035e+08	5.91901e+08	4.30647e+08	4.6382e+08	6.52006e+08	851210873	6.30414e+08	5.05013e+08	4.69217e+08	3.72878e+08	3.7173e+08	0.738353
Q9D5V5	Cullin-5 OS=Mus musculus OX=10090 GN=Cul5 PE=1 SV=3 - [CUL5_MOUSE]	91.54	1	21	117	756	5.80919e+08	1.0049e+08	1.87083e+08	8.25943e+07	7.07712e+07	2.66942e+08	1.63284e+08	5.35464e+08	85630167	2.35902e+08	270755014	1.45806e+08	5.93957e+08	7.71122e+07	1.0851e+08	8.90145e+08	4.71313e+08	6.44626e+07	8.18273e+07	1.44816e+08	1.04775e+09	5.14449e+08	1.24778e+08	7.57206e+07	1.0173e+09	6.23688e+08	8.63499e+08	1.33864e+08	6.95701e+08	9.43621e+07	8.36392e+07	4.16158e+08	5.87948e+08	5.29957e+08	556524366	345321374	9.66898e+07	1.055e+08	2.04372e+08	2.57444e+08	2.39228e+08	3.30513e+08	1.17055
P63325	40S ribosomal protein S10 OS=Mus musculus OX=10090 GN=Rps10 PE=1 SV=1 - [RS10_MOUSE]	91.52	1	6	30	285	3.08137e+08	1.69644e+08	8.6692e+07	2.32792e+08	263402474	2.57475e+08	2.34589e+08	281493448	2.33547e+08	1.58819e+08	1.83442e+08	263355838	1.91428e+08	2.33371e+08	2.5751e+08	1.79455e+08	2.62403e+08	146242666	2.97611e+08	2.56347e+08	1.7874e+08	2.24395e+08	4.11577e+08	1.79949e+08	1.66786e+08	8.96611e+07	7.02619e+08	2.10289e+08	2.74568e+08	1.70205e+08	1.87035e+08	1.71897e+08	2.38287e+08	2.76661e+08	6.229e+07	3.22979e+08	2.68445e+08	2.12442e+08	2.12134e+08	2.33185e+08	2.25821e+08	2.28412e+08	1.06452
P56375	Acylphosphatase-2 OS=Mus musculus OX=10090 GN=Acyp2 PE=1 SV=2 - [ACYP2_MOUSE]	91.51	1	6	17	171	1.7263e+08	8.4315e+07	5.94659e+07	9.57258e+07	60870997	1.5499e+08	146098353	7.48231e+07	1.35425e+08	74319474	1.43834e+08	1.14753e+08	6.09692e+07	1.07446e+08	1.03101e+08	8.72932e+07	9.07091e+07	7.5868e+07	1.07352e+08	1.57518e+08	6.95078e+07	8.88306e+07	73491275	1.1388e+08	1.31657e+08	5.9535e+07	1.61574e+08	9.41731e+07	1.65329e+08	7.74874e+07	7.54586e+07	8.89961e+07	1.26065e+08	1.33194e+08	9.10237e+07	1.80783e+08	1.59721e+08	1.35928e+08	9.46016e+07	1.17131e+08	1.06021e+08	1.03748e+08	1.12071
P61087	Ubiquitin-conjugating enzyme E2 K OS=Mus musculus OX=10090 GN=Ube2k PE=1 SV=3 - [UBE2K_MOUSE]	91.5	2	11	20	288	1.92656e+08	1.75231e+08	1.30319e+08	1.56396e+08	1.18563e+08	2.34563e+08	2.13297e+08	167584709	1.56439e+08	1.05711e+08	1.84276e+08	2.35815e+08	1.35467e+08	1.9087e+08	1.21126e+08	1.15294e+08	1.52148e+08	1.30005e+08	1.74296e+08	218212238	1.55123e+08	1.51928e+08	1.39816e+08	1.7937e+08	1.65036e+08	1.84127e+08	256776860	1.70846e+08	1.95814e+08	1.87637e+09	126691574	2.05009e+09	1.72358e+08	2.32243e+08	1.54519e+08	3.20368e+08	197002959	2.20454e+08	1.54633e+08	1.75519e+08	1.73511e+08	1.57991e+08	1.12208
Q8R1M2	Histone H2A.J OS=Mus musculus OX=10090 GN=H2aj PE=1 SV=1 - [H2AJ_MOUSE]	91.47	6	1	22	326	8.75941e+09	5.60067e+09	7.05104e+09	5.10888e+09	3.1533e+09	8690715324	6979241919	4.44484e+09	3.98687e+09	4.21252e+09	5.88936e+09	8.45823e+09	3625935620	6.02789e+09	5.38304e+09	6371951419	4.89065e+09	6.39114e+09	6.03918e+09	6.61583e+09	4.9816e+09	3.97458e+09	6.57092e+09	3.61583e+09	4.6526e+09	6.72216e+09	5.12491e+09	4.40983e+09	6.29047e+09	6.30477e+09	3.54662e+09	4.075e+09	4.72037e+09	1.08882e+10	6.87198e+09	1.00167e+10	5.51305e+09	4.45501e+09	5.93466e+09	5.66284e+09	5.87689e+09	6.06175e+09	0.990266
Q80Y14	Glutaredoxin-related protein 5, mitochondrial OS=Mus musculus OX=10090 GN=Glrx5 PE=1 SV=2 - [GLRX5_MOUSE]	91.45	2	4	16	95	6.42972e+07	7.59409e+07	6.9436e+07	5.46858e+07	1.85551e+07	8.52393e+07	8.35359e+07	1.28308e+08	3.76741e+07	5.76767e+07	9.24396e+07	160261002	7.74686e+07	5.63364e+07	1.97965e+08	7.41398e+07	1.61845e+08	5.12686e+07	50298165	77826760	5.09007e+07	73744129	9.01897e+07	1.20009e+08	1.27342e+08	8.56022e+07	4.79088e+07	3.84525e+07	6.56314e+07	6.88312e+07	6.25e+07	3.93567e+07	3.08888e+07	1.29578e+08	111694095	1.06429e+08	1.48298e+08	2.21071e+07	5.6583e+07	7.84868e+07	1.16894e+08	8.30758e+07	2.06589
Q7M753	Pantothenate kinase 2, mitochondrial OS=Mus musculus OX=10090 GN=Pank2 PE=1 SV=1 - [PANK2_MOUSE]	91.45	1	2	45	172	8.5612e+09	9.34844e+07	7.47253e+09	1.95703e+08	398562679	281738380	3.80114e+07	16194612982	1.97255e+08	1.83204e+07	1.77078e+08	2.6487e+08	3.1459e+08	83669816	1.76923e+08	1.32022e+08	8.90963e+07	49398527	1.47323e+10	1.09632e+10	1.56559e+08	3.32792e+07	6.81059e+09	247120514	2.38466e+07	1.5554e+08	56401957	2.92872e+07	1.03114e+10	65370850	36594667	0	5.56995e+07	1.87158e+08	1.42301e+08	3.12381e+08	2.7951e+07	335318910	3.3443e+09	3.34599e+09	2.03426e+08	5.19321e+09	0.0608278
Q9R1T2	SUMO-activating enzyme subunit 1 OS=Mus musculus OX=10090 GN=Sae1 PE=1 SV=1 - [SAE1_MOUSE]	91.43	1	16	49	516	5.41268e+08	2.1064e+08	8.20684e+07	1.15848e+08	8.76545e+07	3.5793e+08	1.54435e+08	8.6231e+07	9.82943e+07	1.22581e+08	1.89136e+08	1.21666e+08	2.07125e+08	1.11562e+08	1.07575e+08	1.1354e+08	8.2816e+07	8.88076e+07	4.77091e+08	1.26467e+08	2.18234e+08	2.68415e+08	9.46919e+07	1.26181e+08	1.41701e+08	2.83411e+08	1.37276e+08	1.00113e+08	1.49686e+08	1.03974e+08	7.55558e+07	8.0154e+07	7.8525e+07	1.43477e+08	1.10297e+08	1.71415e+08	1.31771e+08	1.34929e+08	2.07496e+08	1.63894e+08	1.47413e+08	1.77744e+08	0.710437
Q78J03	Methionine-R-sulfoxide reductase B2, mitochondrial OS=Mus musculus OX=10090 GN=Msrb2 PE=1 SV=1 - [MSRB2_MOUSE]	91.43	1	1	18	36	0	7.23908e+07	0	1.16138e+07	1.61617e+08	3.35999e+07	3.9825e+07	5.05001e+07	0	45625749	1.39138e+08	0	6.67154e+07	4.97939e+07	1.90691e+07	2.39055e+08	0	0	0	39030349	37612553	2.77064e+07	0	0	0	0	2.0577e+07	0	0	2.47433e+07	2.3307e+07	35460965	1.19258e+08	2.59586e+07	0	49477988	2.52709e+07	9.26212e+07	4.91244e+07	3.39102e+07	5.49432e+07	5.56172e+07	1.11845
Q61655	ATP-dependent RNA helicase DDX19A OS=Mus musculus OX=10090 GN=Ddx19a PE=1 SV=2 - [DD19A_MOUSE]	91.42	2	7	50	236	2.34769e+08	2.79968e+08	1.12205e+08	4.39616e+08	6.7831e+07	3.1954e+08	3.74311e+08	2.29386e+08	2.55886e+08	1.85686e+07	1.18214e+08	1.9162e+08	4.11659e+08	7.48726e+07	5.18206e+07	180253121	1.09951e+08	2.8788e+08	3.44045e+07	5.70343e+07	9.28481e+07	343144901	4.19973e+07	8.92318e+07	4.11725e+08	284631238	2.4641e+08	3.57324e+08	52618117	2.50777e+08	2.9855e+08	378551546	2.38175e+07	2.39427e+08	4.81112e+08	1.24885e+08	2.32943e+08	2.7512e+08	2.26878e+08	2.39538e+08	1.69637e+08	1.33905e+08	0.747704
Q9DCS3	Enoyl-[acyl-carrier-protein] reductase, mitochondrial OS=Mus musculus OX=10090 GN=Mecr PE=1 SV=2 - [MECR_MOUSE]	91.42	1	5	28	105	2.41851e+08	130925167	8.56723e+07	50217031	6.55697e+07	1.55876e+08	1.41282e+08	9.30165e+07	1.55263e+08	1.44299e+07	1.33707e+08	6.71043e+07	0	2.94327e+07	1.62889e+08	5.69551e+07	9.02804e+07	1.0915e+08	1.27016e+08	5.02044e+07	1.06048e+08	4.32955e+07	1.08304e+08	3.68245e+07	2.24099e+08	6.00081e+07	1.7378e+08	2.47296e+07	7.54596e+07	1.20707e+08	7.91281e+07	1.68727e+08	89356549	140159863	0	6.16185e+07	2.02686e+07	1.75151e+08	1.14847e+08	1.11973e+08	7.86266e+07	8.67212e+07	0.68462
Q8K2Q0	COMM domain-containing protein 9 OS=Mus musculus OX=10090 GN=Commd9 PE=1 SV=3 - [COMD9_MOUSE]	91.41	1	2	15	66	155442860	1.0676e+07	1.10613e+07	36814635	1.67384e+07	17497911	2.0311e+07	4.67843e+07	4.2729e+07	1.61523e+07	24276689	0	4.25484e+07	24703134	1.26749e+07	94151861	1.98617e+07	3.31985e+07	39202763	2.49979e+07	3.9589e+07	1.627e+07	1.1e+07	1.12414e+07	89650733	1.79115e+07	7.38163e+07	4.86791e+07	4.36891e+07	73031129	8.02517e+07	8.55152e+06	3.32546e+07	9.67728e+07	2.69166e+07	3.14722e+07	6.26115e+09	6.14418e+07	4.61466e+07	2.86949e+07	2.08406e+07	4.22826e+07	0.451617
P47856	Glutamine--fructose-6-phosphate aminotransferase [isomerizing] 1 OS=Mus musculus OX=10090 GN=Gfpt1 PE=1 SV=3 - [GFPT1_MOUSE]	91.39	2	3	75	201	2.49048e+08	1.31192e+08	1.14577e+08	3.22782e+08	2.34377e+08	2.5404e+08	1.40103e+08	2.41968e+08	170791484	2.04635e+08	2.05624e+08	2.76898e+08	1.45939e+08	4.08586e+08	3.25528e+08	3.76722e+08	3.00398e+08	2.96481e+08	3.65802e+08	3.22322e+08	5.59737e+08	3.12563e+08	1.39342e+08	1.56736e+08	3.45242e+08	2.2893e+08	3.50661e+08	4.05265e+08	5.65463e+08	6.96641e+08	2.50277e+08	2.0728e+08	5.2241e+08	4.21236e+08	3.98674e+08	7.33638e+08	4.53169e+08	2.0095e+08	2.10395e+08	2.02308e+08	2.72515e+08	3.32345e+08	1.29525
Q9D1E6	Tubulin-folding cofactor B OS=Mus musculus OX=10090 GN=Tbcb PE=1 SV=2 - [TBCB_MOUSE]	91.39	1	12	28	303	4.67423e+08	1.14165e+08	1.17633e+08	1.02353e+09	9.26606e+07	1.3586e+09	1.31658e+08	1.0888e+08	1.48732e+08	7.87521e+07	1.31634e+08	2.12274e+08	1.26172e+08	1.72098e+08	2.87554e+08	1.07526e+08	1.34517e+08	2.61153e+08	1.52524e+08	1.88016e+08	8.73021e+07	7.93766e+07	1.34899e+08	1.50809e+08	1.40444e+08	2.24266e+08	2.14084e+08	1.55447e+08	1.36326e+08	1.09968e+08	6.29178e+07	1.52586e+08	1.57812e+08	1.83255e+08	1.47257e+08	3.23636e+08	2.04903e+08	1.46433e+09	3.63083e+08	3.65325e+08	1.85947e+08	1.68747e+08	0.512132
P80318	T-complex protein 1 subunit gamma OS=Mus musculus OX=10090 GN=Cct3 PE=1 SV=1 - [TCPG_MOUSE]	91.38	2	29	75	1102	2.06145e+09	9.42352e+08	3.73639e+08	6.9615e+08	667411536	1.41196e+09	6.53025e+08	1.3397e+09	3.69147e+08	6.18148e+08	4.98171e+08	7.6175e+08	3.06095e+08	985776140	1.61383e+09	4.54178e+08	1.60028e+09	1.21163e+09	781177308	1.28561e+09	7.63367e+08	7.78863e+08	1.02738e+09	878169174	4.69006e+08	1.84782e+09	1.18983e+09	1.06014e+09	1.15374e+09	4.95473e+08	407942318	1.73375e+09	1292610041	2288619567	2.33731e+09	2526368493	4.15552e+08	9.62522e+08	9.48201e+08	8.78395e+08	8.33124e+08	1.06658e+09	0.878636
P63328	Serine/threonine-protein phosphatase 2B catalytic subunit alpha isoform OS=Mus musculus OX=10090 GN=Ppp3ca PE=1 SV=1 - [PP2BA_MOUSE]	91.36	1	15	64	1496	4.2948e+09	2.44016e+09	2.25449e+09	3160031010	2.19247e+09	3.97287e+09	3742489052	2.98895e+09	3.2805e+09	1.74408e+09	3.52821e+09	4.3963e+09	2.62395e+09	4.07357e+09	3.02881e+09	2.92008e+09	2.48658e+09	2.60987e+09	3545253988	3.80251e+09	2.89244e+09	4.20426e+09	2.25748e+09	3.33979e+09	4.26161e+09	4.7405e+09	6568010110	3.04342e+09	3507412522	3197451576	2.75503e+09	3481054607	4811729651	5.72851e+09	3.22823e+09	5.09796e+09	5.35739e+09	3872000935	2.86839e+09	3.14578e+09	3.53017e+09	3.07286e+09	1.23071
O70492	Sorting nexin-3 OS=Mus musculus OX=10090 GN=Snx3 PE=1 SV=3 - [SNX3_MOUSE]	91.36	1	6	19	195	1.30828e+08	1.37495e+08	1.57214e+08	1.36443e+08	1.14689e+08	2.7339e+08	9.08459e+07	1.23973e+08	1.14677e+08	8.38468e+07	1.54985e+08	1.44729e+08	121810513	1.3178e+08	1.65216e+08	2.12669e+08	1.17032e+08	91428274	1.16406e+08	2.36661e+08	9.32474e+07	9.43933e+07	1.09062e+08	1.41509e+08	5.27084e+07	9.62124e+07	1.73611e+08	1.08288e+08	2.3969e+08	1.83603e+08	1.23422e+08	5.93588e+07	2.03805e+08	1.12464e+08	1.04165e+08	187302439	1.65782e+08	1.53259e+08	1.35334e+08	1.37346e+08	1.43704e+08	1.54839e+08	1.06185
P83917	Chromobox protein homolog 1 OS=Mus musculus OX=10090 GN=Cbx1 PE=1 SV=1 - [CBX1_MOUSE]	91.35	1	3	22	132	4.19938e+08	2.31217e+08	1.6361e+08	2.08248e+08	1.89086e+08	3.43531e+08	3.25664e+08	2.4979e+08	488701090	1.32283e+08	2.70367e+08	3.79861e+08	1.78592e+08	1.79951e+08	2.68563e+08	2.73023e+08	2.28044e+08	2.73355e+08	1.57595e+08	0	1.80366e+08	2.42919e+08	2.05795e+08	431652580	1.83177e+08	412800304	3.21317e+08	1.88317e+08	3.67278e+08	398396209	1.9043e+08	1.97039e+08	351554668	3.74337e+08	2.43695e+08	2.96816e+08	371380107	463976273	2.4242e+08	3.07994e+08	2.55467e+08	1.86403e+08	1.05382
Q78PG9	Coiled-coil domain-containing protein 25 OS=Mus musculus OX=10090 GN=Ccdc25 PE=1 SV=1 - [CCD25_MOUSE]	91.35	1	2	32	263	4.42305e+09	1.95556e+09	3.59172e+09	4.4909e+09	2315303712	4.4725e+09	5.44212e+09	1.90758e+09	1.29161e+10	4.18703e+09	8.34947e+09	3.66891e+09	5.1639e+09	7.09938e+09	4.19628e+09	3.40949e+09	1.89111e+09	2.55936e+09	6.99511e+09	4.58427e+09	6.28656e+09	3.29588e+09	2698004517	3.5004e+09	5.34983e+09	1.36037e+09	5.60077e+09	3.65616e+09	5.73856e+09	5.46161e+09	3.00547e+09	2.41462e+09	2.96559e+09	1.78402e+09	1.7328e+09	2.8395e+09	7.03779e+09	4.27192e+09	3.35531e+09	5.78507e+09	5.69559e+09	3.88787e+09	1.69749
P38647	Stress-70 protein, mitochondrial OS=Mus musculus OX=10090 GN=Hspa9 PE=1 SV=3 - [GRP75_MOUSE]	91.31	1	28	97	1023	4.86323e+08	2.72438e+08	3.08672e+08	7.60256e+08	2.42303e+08	4.12648e+08	4.49526e+08	3.95245e+08	3.5277e+08	2.4714e+08	2.99427e+08	5204644621	1.47693e+09	3.78604e+08	2.63061e+08	3.06245e+08	2.64177e+08	2.85526e+08	3.39516e+08	1.02856e+09	248969996	1.19775e+09	2.63387e+08	4.54657e+08	1.25688e+09	287919314	3.99536e+08	4.44256e+08	4.23215e+08	1304023007	1.20157e+09	5.40523e+08	3.57262e+08	462393130	4.54687e+08	5.96676e+08	5.83412e+08	3.79278e+08	4.13998e+08	3.71466e+08	1.52453e+09	4.44806e+08	3.68246
P51150	Ras-related protein Rab-7a OS=Mus musculus OX=10090 GN=Rab7a PE=1 SV=2 - [RAB7A_MOUSE]	91.3	1	12	30	404	3.16963e+08	396774119	388013795	2.63895e+08	1.3254e+09	555007456	3.77276e+08	3.01812e+08	2.34238e+08	1.13819e+08	2.80686e+08	4.05447e+08	2.43139e+08	3.11497e+08	2.76169e+08	4.67217e+08	364510169	2.38718e+08	2.70942e+08	2.76502e+08	188371045	5.85137e+08	2.0116e+08	2.72142e+08	216532542	4.69255e+08	3.30449e+08	2.64678e+08	2.65852e+08	593457877	203874248	1995364218	2.56914e+08	4.78019e+08	3.34643e+08	9.03419e+08	2.7766e+08	3.56689e+08	5.38209e+08	3.1643e+08	3.03388e+08	3.23578e+08	0.563698
Q8CI43	Myosin light chain 6B OS=Mus musculus OX=10090 GN=Myl6b PE=1 SV=1 - [MYL6B_MOUSE]	91.3	1	2	23	96	2.14194e+08	8.66954e+07	1.29772e+08	316503807	231424576	238762840	2.30314e+08	293337399	1.81687e+08	1.3014e+08	2.08276e+08	499934119	300516139	2.08944e+08	1.02952e+08	1.69367e+08	1.91187e+08	1.48064e+08	1.5554e+08	2.17891e+08	1.74812e+08	180636433	1.65065e+08	186027664	2.32973e+08	3.72418e+08	3.02458e+08	1.3312e+08	506201902	2.14945e+08	1.54447e+08	1.9175e+08	203062325	5.25043e+08	2.50497e+08	227070295	1.32115e+08	3.60463e+08	1.95718e+08	2.14848e+08	2.64124e+08	1.7641e+08	1.34952
P70349	Adenosine 5'-monophosphoramidase HINT1 OS=Mus musculus OX=10090 GN=Hint1 PE=1 SV=3 - [HINT1_MOUSE]	91.27	1	8	13	346	1.80633e+09	8.57958e+08	1.34514e+09	1.59661e+09	1.15676e+09	1.46742e+09	1.78664e+09	1.07816e+09	1.69066e+09	1.12422e+09	1.94786e+09	1.44041e+09	1513903178	2.56571e+09	1873406346	1.30498e+09	1.2316e+09	1.50836e+09	1.93229e+09	2.18496e+09	1.41956e+09	1.45986e+09	1.62844e+09	1.16015e+09	1.56922e+09	1.21769e+09	1.47217e+09	1.74158e+09	2.35258e+09	1518517549	1.31257e+09	1.80619e+09	2.08544e+09	1.45555e+09	1.43574e+09	1.66846e+09	1.80516e+09	1.56692e+09	1.35256e+09	1.42942e+09	1.86826e+09	1.63244e+09	1.38128
P35293	Ras-related protein Rab-18 OS=Mus musculus OX=10090 GN=Rab18 PE=1 SV=2 - [RAB18_MOUSE]	91.26	1	8	31	218	8.99229e+07	5.33053e+07	4.95561e+07	7.94625e+07	4.23126e+07	9.92574e+07	97459246	6.36486e+07	8.53641e+07	43356489	1.03802e+08	9.15421e+07	6.65123e+07	8.46559e+07	6.07724e+07	1.1214e+08	7.02606e+07	7.16349e+07	5.90766e+07	7.63874e+07	4.41724e+07	41192155	3.60396e+07	5.63523e+07	5.66694e+07	8.57095e+07	8.88429e+07	3.2941e+08	8.05454e+07	8.69705e+07	3.67575e+07	2.70201e+07	1.01219e+08	127937946	9.22453e+07	1.23366e+08	6.65625e+07	1.12189e+08	6.29119e+07	7.78172e+07	8.14569e+07	7.78999e+07	1.29478
Q99LP6	GrpE protein homolog 1, mitochondrial OS=Mus musculus OX=10090 GN=Grpel1 PE=1 SV=1 - [GRPE1_MOUSE]	91.24	1	6	22	121	7.0095e+07	9.87007e+07	76410258	7.33839e+07	5.40804e+07	4.44092e+07	8.06524e+07	8.84627e+07	6.89714e+07	7.36148e+07	5.61068e+07	1.0538e+08	8.36451e+07	73190087	6.35501e+07	5.26006e+07	1.23457e+08	6.59294e+07	5.97942e+07	1.33056e+08	48028673	6.17888e+07	1.06467e+08	7.56296e+07	5.74046e+07	6.3538e+07	8.32495e+07	8.24139e+07	6.5094e+07	9.41993e+07	5.50109e+07	8.05028e+07	8.23725e+07	1.15183e+08	8.13909e+07	1.43532e+08	1.04983e+08	9.37712e+07	7.45341e+07	7.12221e+07	7.63744e+07	8.69673e+07	1.02469
Q8R016	Bleomycin hydrolase OS=Mus musculus OX=10090 GN=Blmh PE=1 SV=1 - [BLMH_MOUSE]	91.21	1	16	44	377	1.82317e+08	113693734	1.10127e+08	1.30138e+08	9.99069e+07	1.42952e+08	2.70069e+08	1.038e+08	1.55225e+08	7.85831e+07	1.65834e+08	1.75583e+08	1.49225e+08	1.56558e+08	1.54403e+08	1.27758e+08	1.83951e+08	1.05488e+08	1.27467e+08	1.85604e+08	7.98732e+07	2.06267e+08	1.43135e+08	2.79939e+08	1.06994e+08	1.43319e+08	1.53337e+08	206844195	3.06827e+08	1.54052e+08	197776432	1.57744e+08	3.34687e+08	2.06494e+08	151245766	2.76324e+08	1.19388e+08	1.52945e+08	1.27237e+08	1.50126e+08	1.60321e+08	1.46054e+08	1.26002
F6XLV1	Ciliary rootlet coiled-coil protein 2 OS=Mus musculus OX=10090 GN=Crocc2 PE=3 SV=2 - [CRCC2_MOUSE]	91.21	1	1	194	739	3.42117e+09	3.88129e+08	2.24002e+08	531759036	296447675	5.35478e+08	2.02135e+08	1.49052e+09	2.1134e+09	3.3167e+08	8.4013e+07	2.78322e+09	8.95604e+08	6.97553e+08	1.32497e+08	3.91529e+08	3.91593e+08	5.21559e+08	3.21321e+08	3.3578e+08	2.78039e+08	3.64113e+08	3.27337e+08	760429185	1.50038e+08	1.1515e+09	1232854436	2.8206e+08	2.33722e+08	2.2645e+08	142994651	6.00066e+08	2.88687e+08	3.10762e+08	1.34304e+09	1.20557e+09	4.95282e+08	3.9597e+08	9.72303e+08	9.3464e+08	9.18578e+08	3.92356e+08	0.944744
Q8JZN5	Complex I assembly factor ACAD9, mitochondrial OS=Mus musculus OX=10090 GN=Acad9 PE=1 SV=2 - [ACAD9_MOUSE]	91.2	1	8	75	274	75348921	3.51916e+07	6.80027e+07	1.27645e+09	2.75828e+07	1.29856e+08	104223539	1.08066e+09	6.88278e+07	5.8869e+07	7.94857e+08	9.4141e+07	2.91306e+08	1.53911e+08	5.36822e+07	1.03263e+08	1.51654e+07	1.32637e+08	1.42538e+09	6.01914e+07	2.2217e+07	5.83637e+07	1.06221e+08	9.66502e+07	90267587	2.61824e+06	1.48984e+09	1.28982e+09	93731837	5.60823e+07	8.05529e+07	6.83685e+07	9.14762e+07	65860511	6.02743e+07	4.65819e+08	7.2497e+07	1.08364e+08	2.96515e+08	2.88487e+08	2.7758e+08	3.47326e+08	0.93614
Q6PGF7	Exocyst complex component 8 OS=Mus musculus OX=10090 GN=Exoc8 PE=1 SV=1 - [EXOC8_MOUSE]	91.2	1	19	79	580	223519214	121900593	4.11092e+08	156711155	9.86441e+07	2.21758e+08	2.35565e+08	3.54657e+08	2.7491e+08	8.80551e+07	183312460	2.0173e+08	1.42223e+08	4.80265e+08	4.69321e+08	1.27298e+08	1.44774e+08	1.29083e+08	1.7807e+08	3.72477e+08	7.56505e+08	1.41589e+08	1.31343e+08	178341363	1.81489e+08	1.32006e+08	2.12097e+08	1.77759e+08	1.7493e+08	2.0152e+08	1.15385e+08	1.45784e+08	1.67782e+08	1.65995e+08	1.57739e+08	2.21841e+08	3.00452e+08	1.47625e+08	2.02374e+08	2.34989e+08	2.9537e+08	1.9034e+08	1.45953
Q9CQV6	Microtubule-associated proteins 1A/1B light chain 3B OS=Mus musculus OX=10090 GN=Map1lc3b PE=1 SV=3 - [MLP3B_MOUSE]	91.2	1	2	13	178	1.18623e+09	6.71962e+08	6.60163e+08	8.25774e+08	5.64452e+08	9.88786e+08	1.16307e+09	6.8117e+08	861617489	5.39435e+08	1.14523e+09	1081579994	6.88167e+08	1.05149e+09	6.7681e+08	9.14233e+08	6.95177e+08	7.04227e+08	9.46401e+08	1.1521e+09	8.05333e+08	7.61719e+08	7.57146e+08	6.80968e+08	1.02755e+09	8.56389e+08	1.10779e+09	8.56917e+08	1.04325e+09	1.04522e+09	7.7609e+08	8.11247e+08	991928373	1.29977e+09	9.02125e+08	1.26803e+09	1.01535e+09	947030048	7.81716e+08	8.46817e+08	9.28655e+08	8.82428e+08	1.18797
Q9ES97	Reticulon-3 OS=Mus musculus OX=10090 GN=Rtn3 PE=1 SV=2 - [RTN3_MOUSE]	91.18	1	32	89	1096	1.44535e+09	5.34161e+08	9.61029e+08	908497813	5.3846e+08	8.38443e+08	1.46202e+09	7.16782e+08	7.1105e+08	6.13576e+08	1.22321e+09	1.12188e+09	742498520	8.63744e+08	7.65895e+08	6.78882e+08	4.97122e+08	738459979	7.52732e+08	1.05691e+09	7.25505e+08	5.60583e+08	6.23824e+08	6.05534e+08	9.32234e+08	7.36368e+08	6.67674e+08	8.49485e+08	9.86606e+08	8.59959e+08	6.82427e+08	8.05692e+08	8.51401e+08	1246907912	1.10265e+09	1.51876e+09	1.06304e+09	8.3347e+08	8.775e+08	8.68374e+08	9.43447e+08	7.44822e+08	1.07515
Q8CGC4	Protein LSM14 homolog B OS=Mus musculus OX=10090 GN=Lsm14b PE=1 SV=3 - [LS14B_MOUSE]	91.17	1	1	29	185	3.83485e+09	5.50653e+08	1.4095e+09	3.82467e+09	2.89223e+09	1.43158e+09	0	2.0218e+09	1.03577e+10	3.34386e+09	4.2209e+09	3.49085e+09	1.21689e+08	9.50063e+07	1.34265e+08	2.81123e+09	6.45634e+07	2.32625e+09	5.55403e+09	4.28124e+09	3.77535e+09	9.365e+07	2.25279e+09	184275126	4.58028e+09	1447237934	5.17036e+09	4.57735e+09	1.44506e+08	3.08161e+09	1.80354e+09	1.97707e+09	1.97741e+08	2.56362e+08	1.68145e+09	2.68687e+09	1.09419e+08	4.43571e+09	2.50238e+09	3.43098e+09	1.61254e+09	3.00746e+09	0.644404
Q99M28	RNA-binding protein with serine-rich domain 1 OS=Mus musculus OX=10090 GN=Rnps1 PE=1 SV=1 - [RNPS1_MOUSE]	91.15	1	2	51	174	1.60504e+08	8.59681e+07	8.94854e+07	1.65004e+08	4.48124e+07	1.43731e+08	1.22713e+08	1.19973e+08	5.91518e+07	5.88141e+07	2.09066e+08	1.48061e+08	3.07083e+07	1.19387e+08	8.35441e+08	7.7825e+08	5.17966e+07	7.2117e+07	6.99342e+07	3.0661e+08	8.55149e+08	53252211	1.39377e+08	82866688	1.52505e+08	2.84613e+08	1.73059e+08	8.95812e+07	2.24952e+08	9.40441e+07	2.54566e+08	2.27114e+08	5.78953e+07	3.54746e+08	6.9049e+07	2.32077e+08	1.98387e+08	1.2802e+08	1.09155e+08	1.00877e+08	2.68533e+08	2.55742e+08	2.46011
Q9CQH7	Transcription factor BTF3 homolog 4 OS=Mus musculus OX=10090 GN=Btf3l4 PE=1 SV=1 - [BT3L4_MOUSE]	91.14	1	4	15	117	1.13487e+08	1.25639e+08	6.27759e+07	9.65668e+07	5.86995e+07	53142413	8.60678e+07	1.62751e+08	6.77708e+07	8.06513e+07	117469575	71230895	1.28875e+08	7.98175e+07	4.94203e+07	1.37017e+08	1.43001e+08	9.38756e+07	1.10514e+08	8.23088e+07	84185198	123385073	5.83653e+07	9.62094e+07	47788735	1.22738e+08	1.68392e+08	116201255	1.37505e+07	8.24491e+07	7.58913e+07	1.02288e+08	9.83095e+07	247562056	70709379	1.57958e+08	1.25503e+08	1.37184e+08	91433812	9.00767e+07	8.93626e+07	1.13343e+08	0.977348
Q9Z1S5	Neuronal-specific septin-3 OS=Mus musculus OX=10090 GN=Septin3 PE=1 SV=2 - [SEPT3_MOUSE]	91.14	1	17	36	768	1.02959e+09	5.12988e+08	5.9519e+08	7.81673e+08	5.40226e+08	1.07429e+09	9.13233e+08	662013738	1.23599e+09	5.6393e+08	1.04414e+09	9.71764e+08	8.94258e+08	1.04521e+09	8.016e+08	6.95666e+08	7.55083e+08	6.85759e+08	9.88973e+08	1.01704e+09	9.82333e+08	7.30888e+08	5.94899e+08	6.43731e+08	7.32948e+08	6.52418e+08	9.28933e+08	8.22302e+08	8.57461e+08	8.96155e+08	7.12327e+08	8.72074e+08	1.02999e+09	9.35536e+08	7.81809e+08	1.1197e+09	8.38353e+08	8.09898e+08	6.91934e+08	8.89891e+08	9.51395e+08	8.28505e+08	1.37498
Q9QZQ8	Core histone macro-H2A.1 OS=Mus musculus OX=10090 GN=Macroh2a1 PE=1 SV=3 - [H2AY_MOUSE]	91.13	1	7	44	315	3.80633e+08	3.65328e+08	2.90834e+08	2.40429e+08	1.6195e+08	5.45487e+08	4.33962e+08	2.4556e+08	5.61665e+08	2.44836e+08	4.46301e+08	415743218	1.71757e+08	394850435	2.35525e+08	3.43347e+08	2.10817e+08	3.56998e+08	2.92727e+08	3.46047e+08	313465755	522744078	4.03354e+08	2.02037e+08	2.40493e+08	3.79318e+08	3.7625e+08	2.43092e+08	3.54195e+08	324700651	1.284e+08	1.49392e+08	213994988	6.37552e+08	2.57953e+08	6.73555e+08	2.98956e+08	1.82423e+08	2.87835e+08	4.06302e+08	3.32835e+08	3.09987e+08	1.15634
P31938	Dual specificity mitogen-activated protein kinase kinase 1 OS=Mus musculus OX=10090 GN=Map2k1 PE=1 SV=2 - [MP2K1_MOUSE]	91.09	1	14	53	1081	1005032352	5.41035e+08	5.60499e+08	6.3067e+08	4.59904e+08	8.85541e+08	8.82102e+08	5.77266e+08	7.07491e+08	5.8704e+08	939846394	9.07761e+08	5.95768e+08	921637560	7.22121e+08	6.05393e+08	700477733	5.99471e+08	7.43663e+08	8.85828e+08	5.99629e+08	5.73329e+08	6.50023e+08	6.11231e+08	8.06041e+08	7.16521e+08	9.78446e+08	7.74388e+08	9.24765e+08	7.60837e+08	8.61547e+08	7.1114e+08	8.94057e+08	9.3681e+08	7.22698e+08	1.04202e+09	9.08226e+08	9.04581e+08	6.39428e+08	7.27888e+08	8.17427e+08	7.06966e+08	1.27837
P57746	V-type proton ATPase subunit D OS=Mus musculus OX=10090 GN=Atp6v1d PE=1 SV=1 - [VATD_MOUSE]	91.09	1	19	48	807	8.05517e+09	5.46257e+09	4.50502e+09	6.00523e+09	3.56939e+09	8.60278e+09	7096750143	4.84036e+09	6.88803e+09	1.5333e+08	5.93538e+09	7.30433e+09	5.24861e+09	6.87276e+09	3892802236	5025379532	3.26188e+09	4.18048e+09	6.76383e+09	7.1574e+09	1.7954e+08	6122647952	4.39858e+09	4.81212e+09	5.44415e+09	5477375920	7.95754e+09	5.86426e+09	6.72033e+09	7.76111e+09	4.57779e+09	4.25863e+09	6567692999	7.30852e+09	4.88242e+09	7.94897e+09	7216170254	7.13961e+09	5.51948e+09	5.51625e+09	5.85078e+09	5.27779e+09	1.06002
Q80V91	Probable E3 ubiquitin-protein ligase DTX3 OS=Mus musculus OX=10090 GN=Dtx3 PE=1 SV=2 - [DTX3_MOUSE]	91.07	1	1	32	91	2.54686e+08	9.96841e+07	1.33229e+08	2.51009e+07	9.82179e+07	7.22756e+07	1.24641e+08	1.18988e+08	2.5047e+08	7.95012e+07	2.41043e+08	1.7418e+08	1.36887e+08	1.438e+07	322629340	1.98055e+08	8.75308e+07	157960602	1.4141e+08	3.51022e+08	179502207	1.45e+08	1.41278e+08	1.39411e+07	1.26018e+08	1.35202e+08	2.10894e+08	1.37287e+08	4.36944e+08	1.88708e+08	1.29171e+08	1.65342e+08	5.81699e+08	8.57169e+07	3.89041e+07	2.50881e+08	1.46142e+08	3.16808e+08	1.22183e+08	1.29175e+08	1.77824e+08	1.87196e+08	1.45538
Q9CQ62	2,4-dienoyl-CoA reductase [(3E)-enoyl-CoA-producing], mitochondrial OS=Mus musculus OX=10090 GN=Decr1 PE=1 SV=1 - [DECR_MOUSE]	91.04	1	7	32	175	2.67101e+09	2.96904e+09	1.59212e+09	1.84059e+09	1.88849e+09	3.97286e+09	2.59588e+09	2.37967e+09	2185234709	1.22308e+09	2.76896e+09	3.29892e+09	1.68952e+09	2.5589e+09	1.95418e+09	1.74523e+09	2.71287e+09	2.50061e+09	2.07469e+09	4116786657	2.31399e+09	3193178334	1.55863e+09	3.66034e+09	3.01336e+09	2.55505e+09	3.225e+09	2.76539e+09	2.74637e+09	2327159563	1.53901e+09	3.29966e+09	2.25178e+09	2.97974e+09	2.11754e+09	3.66451e+09	2.55562e+09	4.17663e+09	2.19225e+09	2.47135e+09	2.4541e+09	2.63004e+09	1.11944
Q6NZF1	Zinc finger CCCH domain-containing protein 11A OS=Mus musculus OX=10090 GN=Zc3h11a PE=1 SV=1 - [ZC11A_MOUSE]	91.04	1	1	99	347	7.56839e+08	1.4039e+08	9.24212e+06	7.80397e+07	671791544	1.48083e+09	5.58867e+07	9.69653e+07	8.39142e+08	4.87884e+08	1.73918e+08	1.82708e+09	7.47337e+08	1.57574e+08	2.25422e+07	1.39209e+07	1403970070	1.40243e+08	2.11186e+08	1.24874e+09	8.49181e+07	4.57949e+07	1.4016e+08	9.26105e+08	1.5358e+08	1.36212e+08	8.18547e+07	2.6934e+08	1.26061e+09	9.95272e+07	8.65426e+07	1.75666e+07	9.28934e+08	1.5953e+09	6.12689e+07	2.1027e+09	979516257	7.18359e+08	3.3126e+08	5.92142e+08	5.8569e+08	6.03611e+08	1.76806
Q9QX11	Cytohesin-1 OS=Mus musculus OX=10090 GN=Cyth1 PE=1 SV=2 - [CYH1_MOUSE]	90.95	2	1	46	222	7.978e+08	1.85557e+08	8.63914e+07	5.2817e+08	2.338e+08	5.37873e+08	605903102	3.4396e+08	1.54843e+08	8.48798e+07	7.42464e+08	2.05988e+08	3.38707e+08	1.70108e+08	2.89462e+08	1.86872e+08	1.94249e+08	3.18189e+08	2.24176e+08	1.94905e+08	2.23558e+08	4.83136e+08	1.31594e+08	3.13581e+08	1.70625e+08	3.33036e+08	4.63664e+08	2.97013e+08	3.90415e+08	3.56196e+08	2.46969e+08	5.28461e+07	1.31808e+08	4.02911e+08	3.18956e+08	3.50847e+08	6.22727e+08	252421304	3.66344e+08	3.45492e+08	3.49346e+08	2.23678e+08	0.953601
Q9Z2I9	Succinate--CoA ligase [ADP-forming] subunit beta, mitochondrial OS=Mus musculus OX=10090 GN=Sucla2 PE=1 SV=2 - [SUCB1_MOUSE]	90.93	1	27	62	980	8.68208e+08	5.20223e+08	4.48574e+08	6.65881e+08	4.91946e+08	6.5193e+08	7.94541e+08	5.36961e+08	7.78754e+08	4.53896e+08	6.88739e+08	688392373	6.94912e+08	7.31666e+08	7.55589e+08	7.05577e+08	3.43614e+08	6.24228e+08	8.0383e+08	7.95765e+08	459672981	3.40628e+08	5.17799e+08	5.35725e+08	7.42042e+08	2.9968e+08	7.64321e+08	697206867	8.30947e+08	4.7423e+08	5.76158e+08	7.25426e+08	8.77268e+08	632453788	7.67901e+08	8.52319e+08	8.0536e+08	5.77707e+08	5.98966e+08	6.43216e+08	7.1186e+08	6.54603e+08	1.18848
Q9D8E6	60S ribosomal protein L4 OS=Mus musculus OX=10090 GN=Rpl4 PE=1 SV=3 - [RL4_MOUSE]	90.93	1	15	66	540	1.53878e+10	1.97649e+08	1.00534e+10	1.14609e+10	8.95343e+09	1.89251e+10	3.11766e+08	2.17449e+08	2.72918e+08	7200494892	2.59875e+08	315518869	1.09409e+10	1.27298e+10	1.18971e+10	1.38867e+10	2.17986e+08	3.1686e+08	1.36835e+10	1.67647e+10	11099038741	1.13318e+10	1.15549e+10	1.37384e+10	2.73797e+08	1.54107e+10	17456670955	1.33599e+10	1.60757e+10	3.14498e+08	1.01841e+10	12611075198	1.43372e+10	2.66301e+08	1.48269e+10	24195485736	1.34653e+10	1.61163e+10	9.21063e+09	5.38554e+09	7.22866e+09	8.97395e+09	0.784817
Q9CQ71	Replication protein A 14 kDa subunit OS=Mus musculus OX=10090 GN=Rpa3 PE=1 SV=1 - [RFA3_MOUSE]	90.91	1	2	9	90	1.6325e+09	3350052868	2948897461	3269808586	1142817012	5216247881	4662750328	7.5156e+07	4.19436e+09	2331345594	1.87826e+09	5420280511	3.1167e+09	2.30694e+09	3.70713e+09	3176772614	3398719412	3.00199e+09	4.02286e+09	1.6232e+09	1.76482e+09	3293022220	2.68524e+09	2.17645e+09	1.3779e+09	4118317260	6027593666	1.70364e+09	4.24888e+09	10371076	2962348333	1.76449e+09	4.35342e+09	1.73754e+09	1.60425e+09	3101984760	4.79455e+09	5030152884	2.46881e+09	3.29597e+09	3.28586e+09	3.04471e+09	1.33095
O88544	COP9 signalosome complex subunit 4 OS=Mus musculus OX=10090 GN=Cops4 PE=1 SV=1 - [CSN4_MOUSE]	90.89	1	26	47	753	4.18153e+08	2.66423e+08	1.64193e+08	2.04361e+08	1.39901e+08	3.73856e+08	2.76089e+08	2.34071e+08	1.96929e+08	1.4696e+08	3.86308e+08	325644749	1.84556e+08	261568382	1.72172e+08	2.26977e+08	2.09323e+08	1.75507e+08	2.22767e+08	3.28258e+08	1.66465e+08	2.10072e+08	1.78796e+08	2.39527e+08	2.9913e+08	3.36771e+08	305219148	2.07568e+08	2.44671e+08	3.26855e+08	2.62438e+08	2.14036e+08	2.56037e+08	320315745	2.21066e+08	3.72114e+08	243345313	2.66823e+08	2.38606e+08	2.45581e+08	2.6605e+08	2.32567e+08	1.11502
Q9ERH4	Nucleolar and spindle-associated protein 1 OS=Mus musculus OX=10090 GN=Nusap1 PE=1 SV=1 - [NUSAP_MOUSE]	90.87	1	1	52	426	1498673935	1.24618e+09	540617066	1.00878e+09	4.63406e+08	1.86443e+09	4.31781e+09	877585058	1.04659e+09	2.8439e+09	1.0749e+09	2.18766e+09	9.78027e+08	5.53359e+09	6.9971e+08	1.0049e+09	7.89919e+08	1.95794e+09	1.03355e+09	1.51287e+09	7.41053e+08	860718148	4.87324e+08	1.04015e+09	9.79891e+08	1378747985	1.15147e+09	1.2527e+09	2.50121e+09	1.38967e+09	6.39987e+08	5.8932e+08	1096505807	2162061699	1.13499e+09	1270312969	1.04754e+09	1.46258e+09	9.51532e+08	2.19006e+09	2.09478e+09	1.25984e+09	2.20148
P07356	Annexin A2 OS=Mus musculus OX=10090 GN=Anxa2 PE=1 SV=2 - [ANXA2_MOUSE]	90.86	1	3	42	102	0	389357444	799100362	9.45839e+08	8.67479e+08	0	7.98787e+08	1.12115e+09	1.08942e+09	4.0776e+08	1.82162e+09	9.10445e+08	8.75368e+08	1077461015	1.13985e+09	5.58937e+07	6.73478e+08	1.14671e+09	1.10529e+09	685144290	4.44755e+08	9.3204e+08	8.40705e+08	6.8283e+08	6.57019e+08	0	1.04626e+09	7.80201e+08	1.07085e+08	6.25073e+08	5.83053e+08	8.57222e+08	1.49569e+09	603761634	6.4448e+08	2236012079	490086806	7.84734e+08	6.00355e+08	6.83423e+08	1.16495e+09	7.33304e+08	1.94043
Q9DBG5	Perilipin-3 OS=Mus musculus OX=10090 GN=Plin3 PE=1 SV=1 - [PLIN3_MOUSE]	90.85	1	3	42	125	8.65912e+07	1.07037e+08	6.92608e+07	120237796	1.42546e+07	1.28361e+08	2.0636e+08	9.12802e+07	2.13916e+07	1894784	6.24753e+07	222089664	2.28757e+08	77251536	1.4453e+06	3.3909e+07	7.73769e+06	1.39366e+08	2.12193e+08	3.24499e+08	5.73242e+07	4.87797e+07	1.20715e+07	7.37791e+07	2.1644e+07	7.30095e+07	9.58236e+07	6.22201e+07	180152645	1.17833e+07	3.90181e+07	2.22684e+08	27291072	9.11903e+07	8.54822e+07	5.48457e+07	1.71015e+07	64754769	7.94764e+07	8.98576e+07	1.18404e+08	1.43541e+08	1.4898
Q6P8M1	Putative deoxyribonuclease TATDN1 OS=Mus musculus OX=10090 GN=Tatdn1 PE=1 SV=1 - [TATD1_MOUSE]	90.85	1	2	28	105	558011384	2.74843e+08	209950724	1.2985e+08	2.30351e+08	4.37233e+08	4.89057e+08	2.5325e+08	473896206	1.1609e+08	568209618	2.34362e+08	3.90422e+08	430469746	3.91712e+07	3.39134e+08	1.79534e+08	8.20106e+07	1.80589e+08	6.49674e+08	4.18361e+08	3.46502e+08	5.99397e+08	1.25245e+08	906351264	5.2914e+08	258455432	402437120	3.71799e+08	2.1096e+08	2.96097e+08	2.91295e+08	1488129431	9.27592e+07	2.67293e+08	1.86388e+08	4.0461e+08	2.44967e+08	2.80601e+08	3.53905e+08	3.32527e+08	2.86188e+08	1.18505
P55302	Alpha-2-macroglobulin receptor-associated protein OS=Mus musculus OX=10090 GN=Lrpap1 PE=1 SV=1 - [AMRP_MOUSE]	90.83	1	5	53	288	5.40081e+08	3.16391e+08	4.46952e+08	3.06924e+08	2.7984e+08	6.43943e+08	9.38359e+07	3.59497e+08	423270138	2.19976e+08	613705045	3.9272e+08	5.07224e+08	4.58331e+08	3.56053e+08	3.11295e+08	3.22983e+08	3.16818e+08	6.30646e+08	6.67045e+08	3.9255e+08	2.64948e+08	3.33841e+08	3.55844e+08	326440295	7.44646e+07	4.69153e+08	4.30864e+08	4.47929e+08	5.17936e+07	1.862e+08	2.77586e+08	4.12525e+08	6.9783e+07	5.1599e+08	6.30946e+08	4.13923e+08	4.99587e+08	3.78038e+08	3.48104e+08	4.65607e+08	4.49757e+08	1.23164
O54998	Peptidyl-prolyl cis-trans isomerase FKBP7 OS=Mus musculus OX=10090 GN=Fkbp7 PE=1 SV=1 - [FKBP7_MOUSE]	90.83	1	1	23	192	784343575	4.72509e+08	2.87547e+08	4.55902e+08	2.76217e+08	8.54694e+08	6.57396e+08	3.50974e+08	3.53156e+08	2.36998e+08	2.01905e+09	6.15417e+08	4.63989e+08	4.51886e+08	2.37282e+08	5.49096e+08	7.61317e+07	3.80254e+08	7.66479e+08	5.37438e+08	395461551	3.71527e+08	2.63115e+08	4.13204e+08	6.23536e+08	6.46029e+08	5.69974e+08	3.88167e+08	5.33289e+08	6.83692e+08	3.67266e+08	79845785	4.30511e+08	8.38314e+08	6.13188e+08	7.17289e+08	5.52045e+08	6.88997e+08	4.55304e+08	4.90644e+08	7.57525e+08	4.6188e+08	1.66378
Q8VEB3	Macrophage immunometabolism regulator OS=Mus musculus OX=10090 GN=MACIR PE=2 SV=1 - [MACIR_MOUSE]	90.82	1	1	29	151	0	889602260	3.03266e+08	8.92128e+08	3.07453e+08	5.4961e+07	3.52742e+08	5.79592e+08	458368897	731786936	0	1142846532	3.08041e+08	5.01703e+08	859753791	6.17675e+07	240991457	4.24957e+08	1075296984	6.83018e+08	4.92602e+08	62791819	2.7563e+08	5.95315e+08	5.98627e+08	5.38556e+08	6.77094e+08	4.95112e+08	3.99649e+08	1129287120	0	1002640668	741201227	943616840	519250058	718866078	827937964	6.97038e+08	4.7849e+08	4.3549e+08	5.62469e+08	4.97206e+08	1.17551
Q91WN4	Kynurenine 3-monooxygenase OS=Mus musculus OX=10090 GN=Kmo PE=1 SV=1 - [KMO_MOUSE]	90.81	1	1	45	218	5.19127e+08	7.45306e+07	3.19633e+08	5.65474e+08	2.42338e+08	7.71602e+08	5.60991e+07	5.3239e+08	3.61498e+08	1.31861e+08	9.05612e+08	4.43883e+08	4.06646e+08	4.42173e+08	8.7439e+08	4.49971e+08	5.9319e+07	3.39227e+08	3.96491e+08	20972275	4.35164e+08	6.1922e+08	3.60362e+08	7.18227e+08	4.49596e+08	4.62908e+08	8.88539e+08	5.4583e+08	5.61506e+08	6.37041e+08	3.66493e+08	5.32208e+08	4.05139e+08	7.44703e+08	6.48905e+08	7.56567e+08	3.55241e+08	4.34142e+08	3.4422e+08	3.7069e+08	6.14541e+08	2.53196e+08	1.78531
Q9CQM9	Glutaredoxin-3 OS=Mus musculus OX=10090 GN=Glrx3 PE=1 SV=1 - [GLRX3_MOUSE]	90.8	1	13	38	357	5.49841e+08	1.24828e+08	3.67258e+08	1.99004e+08	1.05015e+08	7.79174e+08	2.10753e+08	1.65779e+08	139062084	9.9438e+07	4.62157e+08	8.41024e+08	1.30254e+08	3.43219e+08	374812223	2.28902e+08	4.68362e+08	1.43107e+08	1.87649e+08	2.10262e+08	1.2966e+08	4.41597e+08	1.57637e+08	222481141	1.24197e+08	2.72283e+08	1.72058e+08	449200924	2.12338e+08	2.46605e+08	1.15645e+08	1.84006e+08	5.23719e+08	6.62144e+08	1.49652e+08	2.49479e+08	573953830	2.14683e+08	2.69189e+08	2.78841e+08	4.30293e+08	2.47656e+08	1.59848
Q61598	Rab GDP dissociation inhibitor beta OS=Mus musculus OX=10090 GN=Gdi2 PE=1 SV=1 - [GDIB_MOUSE]	90.79	1	26	63	1608	3593350811	2.10377e+09	1.57839e+09	1.93549e+09	1.47031e+09	3.24637e+09	3.28489e+09	2.03404e+09	2.0768e+09	1.73897e+09	1.87395e+09	3.30937e+09	1.78697e+09	2.66887e+09	2.63742e+09	2.23732e+09	2.46395e+09	1.91091e+09	2.35655e+09	2.93511e+09	1.95834e+09	1.71931e+09	1.84877e+09	2.35488e+09	2.60928e+09	2.69031e+09	3.20305e+09	2.17179e+09	2.78153e+09	2.37992e+09	1.86436e+09	2.25576e+09	2.98106e+09	3.20846e+09	2.49629e+09	3.78677e+09	2.3523e+09	2.98234e+09	2.13626e+09	2.47621e+09	2.45531e+09	2.38077e+09	1.14935
Q61699	Heat shock protein 105 kDa OS=Mus musculus OX=10090 GN=Hsph1 PE=1 SV=2 - [HS105_MOUSE]	90.79	2	37	112	1823	8.27632e+08	6.01799e+08	5.39679e+08	1435812762	1.05241e+09	1.16653e+09	2.35603e+09	6.49437e+08	5.15513e+08	1.33959e+09	7.05617e+08	1.12526e+09	4.88938e+08	7.40161e+08	6.14024e+08	1.84453e+09	641570271	457300041	5.80753e+08	1.96717e+09	1.30794e+09	5.68861e+08	4.73821e+08	6.52932e+08	6.21226e+08	1.7623e+09	2.05752e+09	6.68525e+08	7.89324e+08	7.77749e+08	1.30182e+09	1.40045e+09	1.59955e+09	1.01977e+09	2.03377e+09	1.22453e+09	2.12317e+09	833457783	8.91467e+08	1.20542e+09	7.34801e+08	1.09827e+09	0.82426
Q6NXN1	SUZ domain-containing protein 1 OS=Mus musculus OX=10090 GN=Szrd1 PE=1 SV=1 - [SZRD1_MOUSE]	90.79	1	1	11	19	154590103	0	95566875	0	0	8.88739e+07	157806821	1.97557e+07	0	1.02577e+07	103349689	189235628	94735089	1.22821e+07	0	1.50911e+07	114310633	86355572	1.15136e+08	0	7.73763e+07	1.06463e+08	88828588	4.41632e+07	5.20905e+07	1.68012e+08	0	0	6.89827e+07	78493527	0	47918212	0	186454528	6.26951e+07	1.752e+07	8.50442e+06	0	5.00314e+07	5.53388e+07	7.99205e+07	6.61786e+07	1.59741
Q91Z31	Polypyrimidine tract-binding protein 2 OS=Mus musculus OX=10090 GN=Ptbp2 PE=1 SV=2 - [PTBP2_MOUSE]	90.77	1	15	46	435	1.94098e+08	2451226481	172477709	1.64233e+09	7.80945e+07	2.00397e+08	2.54135e+08	1.83291e+08	1.45199e+08	1.12969e+09	1.6879e+08	3.43694e+08	1.47182e+08	2.12333e+09	1.84279e+09	1.65729e+08	2.43603e+09	1.57395e+08	168464717	2.27542e+08	1.57506e+08	1.46438e+09	1.41703e+08	1.80704e+08	1.65936e+08	300161597	2.28327e+08	1.31931e+09	2.03767e+09	2.12455e+08	2.12696e+08	1.25288e+09	1.95391e+08	285682081	2139681733	4.63461e+09	1.80529e+08	2.28049e+08	9.07646e+08	3.82542e+08	9.25158e+08	6.31031e+08	1.01929
Q8BG32	26S proteasome non-ATPase regulatory subunit 11 OS=Mus musculus OX=10090 GN=Psmd11 PE=1 SV=3 - [PSD11_MOUSE]	90.76	1	20	59	518	2.3255e+08	1.48797e+08	1.68168e+08	192677910	193817505	1.96382e+08	2.64005e+08	2.05169e+08	169735577	1.46126e+08	7.0877e+08	3.06713e+08	1.72355e+08	2.30872e+08	2.84495e+08	1.8239e+08	2.09169e+08	1.90956e+08	3.39913e+08	2.45988e+08	2.21272e+08	4.48825e+08	2.00864e+08	2.47848e+08	166433321	2.37313e+08	3.13704e+08	2.11017e+08	2.45828e+08	2.8571e+09	1.60206e+08	2.55359e+08	2.36486e+08	310816204	2.16175e+08	405114926	2.23802e+08	2.40136e+08	1.87202e+08	1.96284e+08	3.40641e+08	2.33683e+08	1.81964
Q4VAA2	Protein CDV3 OS=Mus musculus OX=10090 GN=Cdv3 PE=1 SV=2 - [CDV3_MOUSE]	90.75	1	10	40	308	1.67319e+08	2.3923e+08	1.45792e+08	1.64098e+08	1.15055e+08	1.36519e+08	1.8831e+08	1.69615e+08	2.59586e+08	1.11115e+08	1.70313e+08	2.62602e+08	1.24467e+08	214454314	1.63345e+08	1.52133e+08	1.84883e+08	1.53652e+08	1.91962e+08	204260541	1.66382e+08	157075837	1.54477e+08	1.1128e+08	2.36576e+08	1.74008e+08	1.00016e+08	1.4076e+08	1.86147e+08	1.93116e+08	1.30772e+08	1.7665e+08	1.56632e+08	1.66915e+08	3.8346e+08	2.06707e+08	1.57117e+08	1.28647e+08	1.66299e+08	1.73029e+08	1.87036e+08	1.77378e+08	1.1247
P48428	Tubulin-specific chaperone A OS=Mus musculus OX=10090 GN=Tbca PE=1 SV=3 - [TBCA_MOUSE]	90.74	1	7	26	317	2.25323e+08	1.40404e+08	1.25689e+08	6.32858e+07	8.37566e+07	1.06088e+08	1.46495e+08	5.5307e+07	1.31128e+08	1.09344e+08	1.51734e+08	8.31425e+07	1.18652e+08	1.25567e+08	1.42934e+08	1.45028e+08	8.51198e+07	1.87808e+08	1.49017e+08	1.51692e+08	1.34741e+08	8.32379e+07	1.0921e+08	6.2137e+07	1.40077e+08	6.58185e+07	3.04135e+08	1.30799e+08	1.63133e+08	1.29969e+08	7.16976e+07	1.31999e+08	1.40555e+08	9.66603e+07	2.3472e+08	1.03346e+08	1.22247e+08	1.08478e+08	1.27692e+08	1.09672e+08	1.24406e+08	1.43733e+08	0.974268
P30999	Catenin delta-1 OS=Mus musculus OX=10090 GN=Ctnnd1 PE=1 SV=2 - [CTND1_MOUSE]	90.72	1	13	112	471	307102374	2.0653e+08	157823823	1.43355e+08	1.11514e+08	5.76638e+09	2.47686e+08	6.00631e+07	2.37249e+08	7.55373e+07	2.50655e+08	2.24477e+08	2.82488e+08	1.35531e+08	2.75565e+08	4.93156e+09	1.86827e+08	9.9669e+07	3.59649e+08	2.9997e+08	3.28224e+09	1.45535e+08	1.95418e+08	1.62958e+08	1.33405e+08	2.11465e+08	1.19519e+08	8.49423e+07	3.62147e+08	223809577	2.19519e+08	2.37392e+08	5.47677e+08	1.03237e+08	1.71861e+08	1.43049e+08	2.31188e+08	1.93178e+09	1.85265e+08	1.27738e+09	2.33743e+08	1.17554e+09	1.26167
O08788	Dynactin subunit 1 OS=Mus musculus OX=10090 GN=Dctn1 PE=1 SV=3 - [DCTN1_MOUSE]	90.71	2	55	165	1889	8.08559e+08	3.48654e+08	1.96708e+08	3.6373e+08	1.51923e+08	6.593e+08	8.28547e+08	2.92975e+08	2.25527e+08	264573388	283884792	3.9466e+08	251316465	3.12838e+08	2.11355e+08	2.48611e+08	2.86987e+08	4.71858e+08	2.57121e+08	3.14767e+08	2.26184e+08	2.82483e+08	4.63459e+08	5.21927e+08	2.30025e+08	3.06551e+08	360300993	458012317	2.88846e+08	3.1054e+08	287691148	2.50604e+08	2.80406e+08	4.04351e+08	3.29107e+08	4.48352e+08	2.71293e+08	2.55962e+08	3.73915e+08	4.54184e+08	2.90811e+08	3.15869e+08	0.777746
Q8BGQ7	Alanine--tRNA ligase, cytoplasmic OS=Mus musculus OX=10090 GN=Aars1 PE=1 SV=1 - [SYAC_MOUSE]	90.7	1	38	108	1189	3.64407e+08	4.0099e+08	2.43834e+08	2.79601e+08	1.93651e+08	5.4414e+08	4.36722e+08	4.7203e+08	2.55e+08	1.64622e+08	2.70823e+08	3.6785e+08	2.91601e+08	8.9611e+08	2.50463e+08	2.28104e+08	2.73568e+08	2.95504e+08	4.3205e+08	3.50972e+08	200010318	4.24883e+08	2.29704e+08	2.95872e+08	2.76866e+08	5.48983e+08	4.32729e+08	2.76835e+08	323129543	4.42688e+08	2.76123e+08	305859095	354052671	5.57388e+08	338415213	6.33477e+08	2.69862e+08	3.74724e+08	2.96497e+08	3.74503e+08	4.15369e+08	3.16039e+08	1.40092
C0HKD8	Microfibrillar-associated protein 1A OS=Mus musculus OX=10090 GN=Mfap1a PE=1 SV=1 - [MFA1A_MOUSE]	90.66	1	3	55	314	3.51171e+07	2950634752	0	1.19117e+08	2.33154e+09	1.78877e+07	5.27526e+06	2.11574e+07	1.05235e+08	2.52732e+08	1.53776e+08	3.67621e+09	3.59301e+07	5.30645e+07	2.70459e+09	3.76628e+09	3.01449e+07	2.98992e+07	8.69176e+07	2.70414e+07	1.57474e+07	2.57924e+09	3.3611e+07	1.51929e+07	2.2455e+07	2.19711e+07	2.94638e+07	2.3617e+08	5.46025e+08	5.88966e+06	2.98484e+06	1.72604e+07	8.00836e+07	1.5317e+07	3.44687e+07	1.08706e+08	4.13034e+07	5.67815e+07	1.08728e+09	8.04576e+07	1.32471e+09	7.88056e+08	1.21837
P17095	High mobility group protein HMG-I/HMG-Y OS=Mus musculus OX=10090 GN=Hmga1 PE=1 SV=4 - [HMGA1_MOUSE]	90.65	1	3	13	76	0	3.3257e+08	1.16704e+08	1.11756e+08	1.4419e+08	7.76074e+08	3.36428e+07	1.05671e+09	119981170	165630630	0	2.85384e+07	1.117e+08	6.43871e+08	0	1376028329	5.65939e+07	5.72143e+07	1.1886e+08	1.66752e+08	0	1.17752e+07	6.99183e+07	1.85852e+08	8.32895e+08	6.74895e+07	225295309	1.86562e+08	141654598	1.32644e+09	1.05232e+08	0	0	6.68926e+07	8.58116e+07	1.09605e+09	214151855	788625095	1.41044e+08	4.30407e+08	1.56822e+08	3.5509e+08	1.11186
Q91WG5	5'-AMP-activated protein kinase subunit gamma-2 OS=Mus musculus OX=10090 GN=Prkag2 PE=1 SV=2 - [AAKG2_MOUSE]	90.64	1	1	56	277	4.24884e+08	1.47481e+08	3.2564e+08	2.75646e+08	1.83883e+08	2.94748e+08	2.34395e+08	2.00439e+08	1.19949e+08	226443668	3.38812e+07	3.27933e+08	4.72789e+08	7.34279e+08	3.30196e+08	2.28808e+08	1.23415e+08	4.59736e+08	6.05671e+08	5.32869e+08	5.50639e+08	1.82786e+08	4.01131e+08	6.64587e+07	7.93366e+08	1.37985e+08	1.53153e+08	8.98911e+07	7.18786e+08	3.6052e+08	3.65148e+08	7.10867e+07	4.0612e+08	5.69007e+07	3.0606e+08	2.06469e+08	4.36736e+08	2.48952e+08	2.71507e+08	2.15195e+08	3.79815e+08	3.901e+08	1.39892
O88508	DNA (cytosine-5)-methyltransferase 3A OS=Mus musculus OX=10090 GN=Dnmt3a PE=1 SV=2 - [DNM3A_MOUSE]	90.64	1	1	103	491	4.32382e+08	8.43499e+08	1.05025e+09	3.89598e+08	1.37997e+08	1.46458e+08	4.91334e+08	4.09184e+08	4.0218e+08	1.74987e+08	5.42593e+08	1.09024e+08	3.53994e+08	447200153	3.33288e+08	1.70459e+08	1.94211e+08	4.8755e+07	4.79125e+08	4.51975e+08	1.17708e+08	3.38321e+08	1.32515e+08	2.09211e+08	1.52986e+08	3.78477e+08	7.22272e+08	397915360	4.45434e+08	4.07155e+08	3.41806e+08	2.28604e+08	3.38565e+08	1.5299e+08	3.71079e+08	299794228	329301424	3.48366e+08	5.70744e+08	3.24828e+08	3.5722e+08	2.68905e+08	0.625884
Q0VBL3	RNA-binding protein 15 OS=Mus musculus OX=10090 GN=Rbm15 PE=1 SV=1 - [RBM15_MOUSE]	90.64	3	4	117	513	2.92923e+08	1.36763e+08	1.3729e+08	5.1483e+08	3.46968e+08	3.87082e+08	1.99796e+08	1.12748e+08	2.25463e+08	2.47763e+08	4.94945e+08	7.66547e+07	1.07227e+08	1.52574e+09	2.58179e+08	3.24501e+08	2.8534e+08	4.43545e+08	4.47791e+08	3.75714e+08	1.78241e+08	1.27057e+08	3.29298e+08	4.02118e+08	1.48345e+08	2.1601e+08	4.3363e+08	5.5367e+08	3.36825e+08	2.51743e+08	8.87986e+07	8.39325e+08	561099600	4.00184e+08	5.46691e+08	3.33642e+08	5.30174e+08	1.91587e+08	2.85755e+08	2.3457e+08	4.92549e+08	3.75378e+08	1.72368
Q8VEJ9	Vacuolar protein sorting-associated protein 4A OS=Mus musculus OX=10090 GN=Vps4a PE=1 SV=1 - [VPS4A_MOUSE]	90.62	2	3	59	285	6.4787e+08	2.30982e+08	3.67473e+08	8.61967e+07	9.36688e+07	1.70819e+08	1.8042e+08	1.11888e+08	8.70959e+07	2.89703e+08	4.58562e+08	1.21113e+08	2.68784e+08	9.50224e+08	1.47825e+08	3.8872e+08	1.01251e+08	2.23866e+08	1.01399e+08	2.03642e+08	3.27589e+08	8.55638e+07	2.99384e+08	403959978	147714056	8.07923e+07	4.6222e+08	159570056	5.54987e+08	4.41365e+08	9.6604e+07	4.2593e+08	4.32551e+08	5.09372e+08	3.04414e+08	1.39409e+08	1.70477e+08	5.46257e+08	2.85238e+08	1.67985e+08	3.89302e+08	2.03776e+08	1.36483
Q69Z98	Serine/threonine-protein kinase BRSK2 OS=Mus musculus OX=10090 GN=Brsk2 PE=1 SV=2 - [BRSK2_MOUSE]	90.61	2	9	94	397	6.91313e+09	2.82522e+08	1.91718e+08	4.14531e+09	2.85765e+09	7.57479e+09	3.35404e+08	833844870	3.33311e+09	2.71982e+09	6.09737e+09	6.14988e+08	1.97519e+08	4.40067e+09	9.43773e+07	5.24294e+09	5.98362e+08	3.96525e+09	5.672e+08	3.83186e+08	3.16145e+08	1.64874e+08	4.12841e+08	3.46648e+08	4.65353e+09	4.32915e+08	6.26463e+09	832149877	7.64185e+08	3.05123e+08	3.89839e+09	4.26278e+08	4.98498e+09	5.59906e+08	6.82385e+08	9.38617e+08	1.05209e+08	4.83801e+09	2.87807e+09	2.95939e+09	2.28099e+09	2.15139e+09	0.792541
Q8CI32	BAG family molecular chaperone regulator 5 OS=Mus musculus OX=10090 GN=Bag5 PE=1 SV=1 - [BAG5_MOUSE]	90.6	1	6	44	207	1095419672	6.0257e+08	6.24512e+08	7.51461e+08	8.22452e+08	1042786707	9.92951e+08	7.71393e+08	793164479	4.30272e+08	7.7711e+08	9.81933e+08	6.53699e+08	1.11317e+09	6.83685e+07	1.04715e+09	6.83139e+08	6.73969e+08	7.65337e+07	8.51545e+07	6.77602e+08	7.18909e+08	6.3087e+08	8.36101e+08	7.80812e+08	9.18012e+08	7.59715e+07	8.39061e+08	8.40854e+07	8.22998e+08	9.66276e+08	8.91255e+08	5.69086e+07	9.38886e+07	8.5203e+08	92639736	5.11372e+07	8.23029e+07	7.79283e+08	8.06113e+08	7.18856e+08	5.13189e+08	0.922459
P32067	Lupus La protein homolog OS=Mus musculus OX=10090 GN=Ssb PE=1 SV=1 - [LA_MOUSE]	90.6	2	16	76	601	8.31119e+08	547915384	6.95429e+09	8.15891e+09	346884438	5.83777e+08	1.06951e+10	7.82945e+09	8.09147e+09	6.48753e+09	4.33163e+08	9.1032e+08	7.64902e+09	9.97987e+09	3.97593e+08	5.68016e+08	5.14422e+08	7.26663e+09	9226304133	870649061	6.01077e+08	7501780311	3.60631e+08	546449337	624042614	5.235e+08	1.1817e+10	9.82258e+09	6.89496e+08	5.76365e+08	3.54536e+08	9.14746e+09	4.32036e+08	8.89327e+08	6.81275e+08	1.05184e+09	9.24675e+09	5.91943e+08	3.36782e+09	6.73746e+09	3.87399e+09	3.6892e+09	1.1503
Q9DCW4	Electron transfer flavoprotein subunit beta OS=Mus musculus OX=10090 GN=Etfb PE=1 SV=3 - [ETFB_MOUSE]	90.59	1	12	32	312	2.85506e+08	1.66971e+08	2.07823e+08	2.48621e+08	1.82293e+08	2.68422e+08	2.5549e+08	2.76979e+08	2.4271e+08	1.8467e+08	2.20513e+08	315259953	145162056	2.46929e+08	1.98011e+08	203938614	1.77113e+08	218224188	2.48491e+08	2.96712e+08	1.67018e+08	1.40597e+08	2.04977e+08	2.53028e+08	2.06494e+08	1.83618e+08	2.18608e+08	2.41184e+08	253691636	2.15764e+08	2.24722e+08	291754768	242920550	3.13341e+08	2.16784e+08	3.3012e+08	3.60563e+08	2.46028e+08	2.18243e+08	2.45654e+08	2.25175e+08	2.28896e+08	1.03176
P15864	Histone H1.2 OS=Mus musculus OX=10090 GN=H1-2 PE=1 SV=2 - [H12_MOUSE]	90.57	3	3	52	452	1.61915e+09	7.67174e+08	1476891810	9.3731e+08	617376421	1.37071e+09	1.49571e+09	8.41813e+08	8.88715e+08	1.28016e+09	1.41625e+09	1.1811e+09	8.16529e+08	1.35434e+09	9.34654e+08	1.23686e+09	7.50357e+08	1.32266e+09	1.40109e+09	1.93175e+09	7.07919e+08	7.52004e+08	1.4005e+09	843684397	1.03399e+09	1.09316e+09	1.27535e+09	1.04208e+09	1451906522	1.54537e+09	6.59282e+08	8.52976e+08	1.08545e+09	1.36878e+09	1.24587e+09	1.7395e+09	1.6139e+09	1.05948e+09	1.08358e+09	1.17542e+09	1.14057e+09	1.32854e+09	1.0526
Q9JIL4	Na(+)/H(+) exchange regulatory cofactor NHE-RF3 OS=Mus musculus OX=10090 GN=Pdzk1 PE=1 SV=1 - [NHRF3_MOUSE]	90.56	1	1	64	274	3.02199e+08	4.50383e+08	2.02454e+08	1.49495e+08	5.27996e+07	5.16589e+08	5.22544e+08	3.58476e+08	1.60808e+08	9.96018e+07	3.32162e+08	1.47848e+09	8.2025e+08	6.37907e+08	3.62528e+08	8.98703e+08	6.48274e+08	2.90663e+08	1.72656e+08	7.83179e+07	6.07918e+08	2.83129e+08	2.73079e+08	9.07449e+06	1.01383e+09	1.01739e+09	760265220	8.37558e+07	1.36515e+08	5.66662e+08	1.00195e+09	177661655	5.66536e+08	1.41384e+09	1.41602e+08	4.14186e+08	1.02828e+08	9.48778e+07	2.31466e+08	3.31604e+08	7.26266e+08	4.17723e+08	3.13768
Q3UMT1	Protein phosphatase 1 regulatory subunit 12C OS=Mus musculus OX=10090 GN=Ppp1r12c PE=1 SV=1 - [PP12C_MOUSE]	90.54	1	7	101	361	6.33674e+08	4.32113e+07	8.1575e+08	4.8201e+08	4.68812e+07	8.64665e+08	1.42307e+08	8.99592e+08	3.99206e+08	2.80841e+08	2.37645e+08	1.29687e+09	4.41403e+07	7.40197e+07	1.12244e+09	1.21064e+08	1.56933e+09	8.23077e+08	1.02714e+09	206807444	1.60057e+08	2.66894e+08	8.24281e+08	5.45243e+08	2.15422e+08	1.31705e+08	1.81767e+09	1.46371e+08	244345766	1.53237e+09	2.01073e+08	2.47895e+08	1.12094e+08	2.50687e+08	1.16142e+09	9.10425e+08	1.32435e+09	2.49361e+09	4.04305e+08	5.17322e+08	5.55021e+08	7.49482e+08	1.37278
Q8CGK3	Lon protease homolog, mitochondrial OS=Mus musculus OX=10090 GN=Lonp1 PE=1 SV=2 - [LONM_MOUSE]	90.52	1	17	99	477	2.94338e+08	5.55902e+07	6.10744e+07	9.38629e+07	5.82633e+07	3.51044e+08	2.73317e+08	9.89621e+07	3.88735e+09	5.04929e+07	2.133e+08	2.02163e+08	1.38852e+08	1.35253e+08	1.8347e+09	6.83728e+07	4.97114e+07	6.78001e+07	1.74542e+08	2.1721e+08	7.01203e+07	6.63311e+07	5.74707e+07	9.07204e+07	177855755	1.18435e+08	1.23321e+08	9.40596e+07	2.91555e+08	7.17505e+07	8.27666e+07	3.17679e+08	2.03185e+08	3.31416e+08	1.131e+08	3.39285e+08	2.69788e+08	8.87506e+07	1.12626e+08	9.32232e+08	5.04853e+08	1.15527e+08	4.48257
P00015	Cytochrome c, testis-specific OS=Mus musculus OX=10090 GN=Cyct PE=1 SV=3 - [CYC2_MOUSE]	90.48	1	1	12	229	2.06654e+09	7.13416e+08	8.90767e+08	1.08944e+09	7.76714e+08	2.19481e+09	1.51639e+09	9.32371e+08	1221846960	6.88187e+08	1.31601e+09	1.41321e+09	9.61121e+08	1.38308e+09	1.23991e+09	1.78503e+09	8.63154e+08	1.10294e+09	1.29586e+09	1.47919e+09	1.15709e+09	1.04954e+09	8.67726e+08	1.11393e+09	1204040908	9.63008e+08	1458944894	1.15403e+09	1.42391e+09	1.1133e+09	1.134e+09	1.26045e+09	1.31048e+09	1.13927e+09	1.06684e+09	1.40074e+09	1.66154e+09	2.01456e+09	1.10738e+09	1.31072e+09	1.26266e+09	1.30524e+09	1.14023
P11499	Heat shock protein HSP 90-beta OS=Mus musculus OX=10090 GN=Hsp90ab1 PE=1 SV=3 - [HS90B_MOUSE]	90.47	1	36	122	3250	6.12874e+09	4.30097e+09	3.62434e+09	4.42374e+09	3.25143e+09	5.01753e+09	5.34689e+09	4.7173e+09	4.15555e+09	3.12026e+09	5.1893e+09	6.1797e+09	3.74531e+09	5.10628e+09	4125933702	4.0844e+09	4018285995	3.80909e+09	4.79301e+09	5.80712e+09	3736304249	3.95954e+09	3.99124e+09	5.39255e+09	5.21019e+09	5.35651e+09	6.45709e+09	4.49511e+09	6.06576e+09	5.05596e+09	3.71235e+09	4161444454	4.93238e+09	6.28015e+09	4.89346e+09	7.84706e+09	5.97643e+09	6.01527e+09	4.34585e+09	4.4715e+09	4.86931e+09	4.50238e+09	1.12045
P07724	Albumin OS=Mus musculus OX=10090 GN=Alb PE=1 SV=3 - [ALBU_MOUSE]	90.46	1	40	76	2117	5205488379	2.46173e+09	2.35125e+09	3.21495e+09	1.78762e+09	5.21936e+09	3.46241e+09	4.27795e+09	3.09763e+09	2.5364e+09	3.39379e+09	3.89141e+09	2.87353e+09	4.49869e+09	2.44379e+09	2.62695e+09	5.11277e+09	3.49303e+09	5.41291e+09	4.63108e+09	3.327e+09	3.08987e+09	2.88594e+09	3.03743e+09	3.26472e+09	3.42405e+09	5191996646	3.84154e+09	4.15637e+09	4.19527e+09	3.03251e+09	4.69575e+09	4.149e+09	4358753057	3.49202e+09	4994401499	4.41044e+09	3.77348e+09	3.00421e+09	3.71875e+09	3.42024e+09	4.25535e+09	1.13848
Q9CQC6	Basic leucine zipper and W2 domain-containing protein 1 OS=Mus musculus OX=10090 GN=Bzw1 PE=1 SV=1 - [BZW1_MOUSE]	90.45	1	12	54	371	1.07391e+09	2.82465e+08	4.12678e+08	7.34463e+08	4.01101e+08	1.03148e+09	7.62862e+08	7.88496e+07	7.36597e+08	4.61892e+08	8.35081e+08	1.36362e+09	743446829	7.361e+07	1.74474e+08	5.68647e+08	4.52209e+08	9.7105e+08	7.77851e+07	6.68425e+08	656294291	7.57916e+08	7.52753e+08	3.80102e+08	5.70826e+08	7.77415e+07	931376072	919212800	1286209616	5.8969e+08	5.66437e+08	1.08813e+09	2.70237e+08	6.77561e+08	9.44104e+08	4.29493e+08	3.53801e+08	1.2561e+08	5.80923e+08	6.14337e+08	6.38046e+08	5.47623e+08	1.09833
Q91WU5	Arsenite methyltransferase OS=Mus musculus OX=10090 GN=As3mt PE=1 SV=2 - [AS3MT_MOUSE]	90.43	1	4	36	155	2.15158e+09	1.23424e+09	1.13214e+09	2.07559e+09	1644252501	1825745682	1.74225e+09	1.53016e+09	1.44074e+09	1.26745e+09	4860729029	1.75453e+09	1.28909e+09	1.70531e+09	1.46458e+09	2186370056	9.24153e+08	1.31089e+09	2.19025e+09	1.71954e+09	1.3216e+09	1.59815e+09	1.24338e+09	9.70321e+08	1.37797e+09	1.17475e+09	1.59267e+09	1.62399e+09	5.05236e+09	2.57612e+09	1.3275e+09	1.81179e+09	2.57142e+09	1.30451e+09	1.57032e+09	2.29373e+09	4.05936e+09	1.06059e+09	1.64756e+09	1.56127e+09	2.21485e+09	1.66624e+09	1.34432
Q03265	ATP synthase subunit alpha, mitochondrial OS=Mus musculus OX=10090 GN=Atp5f1a PE=1 SV=1 - [ATPA_MOUSE]	90.42	1	21	71	727	4.17827e+08	7.49031e+08	7.39552e+08	1.04533e+09	6.92293e+08	494667479	5.53437e+08	7.48743e+08	8.88494e+08	5.83289e+08	3.45397e+08	459193638	7.42751e+08	8.78814e+08	8.99352e+08	3.19679e+08	4.72397e+08	8.74581e+08	8.37552e+08	1.4578e+09	6.21865e+08	5.66974e+08	7.72542e+08	1.1414e+09	9.87118e+08	7.1823e+08	1.07868e+09	1.08768e+09	1.08553e+09	7.74356e+08	4.18942e+08	1.26486e+09	1.3164e+09	557898788	8.4452e+08	1.84768e+09	3.0815e+08	8.9997e+08	7.28806e+08	6.53726e+08	6.65101e+08	7.92402e+08	0.91259
Q8VD63	Testis-specific Y-encoded-like protein 4 OS=Mus musculus OX=10090 GN=Tspyl4 PE=1 SV=1 - [TSYL4_MOUSE]	90.39	1	3	47	174	8.60102e+07	59400416	1.58561e+07	6.84384e+07	5.01519e+07	3.3437e+08	5.14273e+07	3.43317e+07	6.55955e+07	2.1708e+07	7.00797e+08	1.11645e+09	5.95121e+07	5.37507e+07	25904306	426060614	4.34557e+07	1.25429e+08	9.63702e+07	2.02447e+07	4.67872e+07	1.00835e+08	3.89155e+07	1.03398e+08	4.10176e+07	3.60778e+07	9.79041e+07	0	4.26488e+07	8.45161e+07	9.7691e+07	5.72587e+08	1.8331e+08	7.97265e+08	5.64844e+08	0	2.41049e+07	1.73007e+07	5.59714e+07	1.01486e+08	3.91282e+08	1.42312e+08	6.99075
Q80W15	Insulin-like growth factor-binding protein-like 1 OS=Mus musculus OX=10090 GN=Igfbpl1 PE=2 SV=1 - [IBPL1_MOUSE]	90.37	1	1	26	123	0	5.55423e+07	2.51895e+07	1.09212e+08	3.974e+07	7.54849e+07	8.50129e+07	5.53694e+07	6.24063e+07	50206317	0	2.26433e+06	43276560	1.03618e+08	2.67311e+08	0	3.63779e+07	4.89751e+07	143357650	4.67203e+07	7.80304e+07	8.35687e+07	23574704	7.36583e+07	81096195	6.17878e+07	1.44797e+08	6.05376e+07	0	54927657	5.25177e+07	3.19976e+07	3.70352e+07	5.52019e+07	8.84312e+07	7.85962e+07	3.43739e+07	81150893	4.59367e+07	6.5696e+07	8.32941e+07	5.50862e+07	1.81324
O88952	Protein lin-7 homolog C OS=Mus musculus OX=10090 GN=Lin7c PE=1 SV=2 - [LIN7C_MOUSE]	90.36	3	3	24	277	2.24422e+08	1.79995e+08	2.69753e+08	3.52757e+08	1.49298e+08	1.69533e+08	2.0229e+08	252989628	3.75214e+08	1.7026e+08	2.73826e+08	3.03626e+08	189418889	248104550	316098040	9.45688e+07	2.45276e+08	3.13843e+08	2.35884e+08	2.42093e+08	1.88055e+08	2.4613e+08	3.35115e+08	3.30213e+08	1.52605e+08	3.25916e+08	2.57735e+08	2.2415e+08	2.10079e+08	3.51348e+08	2.92784e+08	1.77029e+08	2.91359e+08	1.75026e+08	1.44421e+08	2.22999e+08	3.59152e+08	2.01761e+08	2.35245e+08	2.34057e+08	2.66215e+08	2.26333e+08	1.13165
P62754	40S ribosomal protein S6 OS=Mus musculus OX=10090 GN=Rps6 PE=1 SV=1 - [RS6_MOUSE]	90.36	1	7	40	275	332443192	1.89325e+08	1.86051e+08	4.02687e+08	2.9443e+08	3.17902e+08	6.00899e+08	3.70675e+08	4.23427e+08	2.4136e+08	1.46735e+08	3.6009e+08	3.36756e+08	9.77585e+07	2.54459e+08	4.55903e+08	2.30823e+08	3.69029e+08	457198350	1.20861e+08	3.2989e+08	1.84459e+08	3.26419e+08	6.14164e+08	4.33968e+08	3.26498e+08	7.37256e+08	3.74499e+08	194536210	248524883	1.64506e+08	3.42386e+08	2.03232e+08	3.34092e+08	4.50507e+08	2.69393e+08	2.40992e+08	1.9272e+08	2.80987e+08	3.90853e+08	2.39159e+08	3.26763e+08	0.85114
P62843	40S ribosomal protein S15 OS=Mus musculus OX=10090 GN=Rps15 PE=1 SV=2 - [RS15_MOUSE]	90.34	1	4	18	130	142827390	63874891	7.65274e+07	7.79797e+07	3.46776e+07	1.32068e+08	8.79197e+07	8.608e+07	1.57483e+08	1.17268e+08	5.26687e+07	1.13142e+08	1.42535e+08	2.16953e+08	2.25533e+08	1.04421e+07	6.7913e+07	152772410	1.38551e+08	1.15966e+08	1.09487e+08	3.86578e+07	1.42963e+08	61581920	1.75552e+07	118071804	7.78619e+07	1.81707e+08	0	3.46934e+07	1.16805e+08	2.09608e+09	163478680	8.69566e+07	6.08696e+07	1.55717e+08	5.99407e+07	80975572	7.91774e+07	1.16164e+08	1.50166e+08	9.7129e+07	1.89658
[truncated: 4,144 more rows]
[truncated: 210 more columns]
