# Supplementary material for: Disruption of Reelin signaling in a dual-hit mouse model of schizophrenia: impact of postnatal Δ9-tetrahydrocannabinol exposure in a maternal immune activation model
Source: Research Square preprint supplement (doi:10.21203/rs.3.rs-7299003/v1), 2026-01-13
Supplement: Supplementary file 4 [file cc556fda6db013d166f90df8.docx]

**Disruption of Reelin signaling in a dual-hit mouse model of schizophrenia: impact of postnatal Δ9-tetrahydrocannabinol exposure in a maternal immune activation model**

**Celia Martín-Cuevas a,b , Víctor Darío Ramos-Herrero a 1 , Álvaro Flores-Martínez a 1, Irene González-Recio d , María Luz Martínez-Chantar d , Juan Carlos Leza e, J. Javier Meana b,f, Benedicto Crespo-Facorro a,b,c 2 *, Ana C. Sánchez-Hidalgo a,b 2**

**Supplementary material 1 (PDF)**

This supplementary file includes detailed validation of the maternal immune activation model, behavioral test protocols and outcomes, statistical analyses of non-significant tests, and proteomic profiling data. It provides supporting evidence for physiological, molecular, and behavioral changes observed in the dual-hit mouse model of schizophrenia following postnatal THC exposure.

**Supplementary material 2 (Excel)**

This supplementary spreadsheet lists the pregnant female mice used to generate the experimental cohorts for the dual-hit schizophrenia mouse model. It includes identification numbers, treatment conditions, and breeding details relevant to the maternal immune activation and postnatal THC exposure protocol described in the study.

**Supplementary material 3 (Excel)**

This supplementary file contains the raw proteomic data obtained from prefrontal cortex samples in the dual-hit mouse model of schizophrenia. The dataset includes quantified protein expression values across experimental groups and serves as the basis for the comparative analysis reported in the main manuscript.

**Supplementary material 4 (Excel)**

This supplementary file lists the differentially expressed proteins identified in the prefrontal cortex of the dual-hit mouse model of schizophrenia. It includes proteins exclusively altered in males or females, as well as those commonly affected in both sexes, providing insight into sex-specific and shared proteomic alterations.
